# Supplementary material for: Correlation between high ratio of circulating PMN-MDSCs and poor prognosis in metastatic hormone sensitive prostate cancer
Source: Research Square preprint supplement (doi:10.21203/rs.3.rs-1452049/v1), 2022-03-16
Supplement: Supplementary file 1 [file bff419ceb20021c008a21186.xlsx]

## Sheet: All significance data
Cenetoral Memory CD4 T cells (CD27+CCR7+CD62L+CD3e+CD4+TRAC+ cells)			Cenetoral Memory CD8 T cells (CD27+CCR7+CD62L+CD3e+CD8+TRAC+ cells)			Effectorl Memory CD4 T cells (CD27–CCR7–CD62L–CD3e+CD4+TRAC+ cells)			Effectorl Memory CD8 T cells (CD27–CCR7–CD62L–CD3e+CD8+TRAC+ cells)			CD4D8DN T cells (CD3e+TRAC+TRGC–TRDC–NKG7–CD4–CD8– cells)			Naive B cells (IgM+IgD+IgG1-4–IgE–IgA1,2–CD3e-CD56– cells)			IgG+ B cells (IgG1-G+IgM,D,E,A1, 2–cells)			gd T cells (CD3e+TRDC+TRGC1,2+CD4–CD8–TRAC– cells)			NK cells (CD3e–NKG7+CD16+ cells)			NKT cells (CD3e+NKG7+CD16+CD4+ or CD8+ TRDC– cells)			Classical Monocytes (CD11b+CD14+CD15+CD16a+HLA-DRB1+Lineage–)			Intermediate Monocytes (CD11b+CD14+CD16a+HLA-DRB1+CD15–Lineage–)			Neutrophils (CD11b+CD15+CD16a+CD32+ cells)			Basophils (FceRIA+CD11c+CD63+Lineage– cells)			PMN-MDSCs (CD3e–CD14–CD11b+ CD15+ cells)			M-MDSCs (CD14+CD11b+CD3e–CD15–HLA-DRB1– cells)			e-MDSCs (Lineage–CD11b+ CD33+ cells)
FeatureID	FeatureName	Log2 Fold Change	FeatureID	FeatureName	Log2 Fold Change	FeatureID	FeatureName	Log2 Fold Change	FeatureID	FeatureName	Log2 Fold Change	FeatureID	FeatureName	Log2 Fold Change	FeatureID	FeatureName	Log2 Fold Change	FeatureID	FeatureName	Log2 Fold Change	FeatureID	FeatureName	Log2 Fold Change	FeatureID	FeatureName	Log2 Fold Change	FeatureID	FeatureName	Log2 Fold Change	FeatureID	FeatureName	Log2 Fold Change	FeatureID	FeatureName	Log2 Fold Change	FeatureID	FeatureName	Log2 Fold Change	FeatureID	FeatureName	Log2 Fold Change	FeatureID	FeatureName	Log2 Fold Change	FeatureID	FeatureName	Log2 Fold Change	FeatureID	FeatureName
ENSG00000197728	RPS26	3.00094	ENSG00000163221	S100A12	3.81882	ENSG00000143546	S100A8	6.82223	ENSG00000090382	LYZ	2.72272	ENSG00000197728	RPS26	2.85042	ENSG00000143546	S100A8	5.6061	ENSG00000224137	LINC01857	3.55166	ENSG00000160307	S100B	5.5878	ENSG00000160307	S100B	3.94282	ENSG00000100453	GZMB	3.1525	ENSG00000256618	MTRNR2L1	3.63127	ENSG00000256618	MTRNR2L1	3.31651	ENSG00000271503	CCL5	5.82959	ENSG00000100721	TCL1A	4.49706	ENSG00000129757	CDKN1C	4.00323	ENSG00000169100	SLC25A6	3.22261	ENSG00000173369	C1QB
ENSG00000137312	FLOT1	2.67952	ENSG00000038427	VCAN	3.57613	ENSG00000090382	LYZ	6.1557	ENSG00000197728	RPS26	2.04345	ENSG00000172725	CORO1B	1.14613	ENSG00000163220	S100A9	5.06221	ENSG00000165997	ARL5B	3.5033	ENSG00000107317	PTGDS	4.40011	ENSG00000107317	PTGDS	1.86555	ENSG00000204389	HSPA1A	2.59728	ENSG00000124491	F13A1	1.92373	ENSG00000124491	F13A1	2.5522	ENSG00000256618	MTRNR2L1	5.14154	ENSG00000256618	MTRNR2L1	4.01423	ENSG00000205269	TMEM170B	3.20572	ENSG00000277443	MARCKS	2.92982	ENSG00000105699	LSR
ENSG00000184260	HIST2H2AC	1.62507	ENSG00000085265	FCN1	3.47722	ENSG00000257764	AC020656.1	6.08527	ENSG00000237541	HLA-DQA2	1.49932	ENSG00000067082	KLF6	1.02998	ENSG00000256618	MTRNR2L1	4.25965	ENSG00000211893	IGHG2	3.17315	ENSG00000132965	ALOX5AP	2.0737	ENSG00000237541	HLA-DQA2	1.64918	ENSG00000134539	KLRD1	2.33927	ENSG00000197728	RPS26	1.68394	ENSG00000019169	MARCO	2.4014	ENSG00000109321	AREG	3.98953	ENSG00000198848	CES1	3.14322	ENSG00000081041	CXCL2	3.20572	ENSG00000177700	POLR2L	2.85582	ENSG00000163221	S100A12
ENSG00000076641	PAG1	1.41649	ENSG00000143546	S100A8	3.29252	ENSG00000163220	AC020656.2	6.00537	ENSG00000204389	HSPA1A	1.11622	ENSG00000160213	CSTB	0.867093	ENSG00000169429	CXCL8	4.23541	ENSG00000128626	MRPS12	2.85122	ENSG00000159674	SPON2	1.94949	ENSG00000198502	HLA-DRB5	1.62381	ENSG00000197728	RPS26	2.10527	ENSG00000198848	CES1	1.67512	ENSG00000119922	IFIT2	2.36203	ENSG00000154451	GBP5	3.18884	ENSG00000124491	F13A1	2.08512	ENSG00000005810	MYCBP2	3.09881	ENSG00000155090	KLF10	2.77782	ENSG00000072694	FCGR2B
ENSG00000184557	SOCS3	1.39645	ENSG00000169429	CXCL8	3.28638	ENSG00000085265	AC020656.3	5.48688	ENSG00000100300	TSPO	1.02232	ENSG00000213145	CRIP1	0.834467	ENSG00000163563	MNDA	3.90735	ENSG00000138670	RASGEF1B	2.85122	ENSG00000197728	RPS26	1.82074	ENSG00000197728	RPS26	1.55469	ENSG00000100097	LGALS1	1.9693	ENSG00000096060	FKBP5	1.14132	ENSG00000124882	EREG	2.1492	ENSG00000137959	IFI44L	3.00723	ENSG00000197728	RPS26	1.73796	ENSG00000048649	RSF1	3.09881	ENSG00000105374	NKG7	2.75764	ENSG00000256618	MTRNR2L1
ENSG00000143183	TMCO1	1.36204	ENSG00000163220	S100A9	3.12086	ENSG00000158869	AC020656.4	5.2742	ENSG00000204287	HLA-DRA	0.986551	ENSG00000197448	GSTK1	0.821157	ENSG00000090382	LYZ	3.46243	ENSG00000143297	FCRL5	2.5033	ENSG00000137441	FGFBP2	1.69908	ENSG00000170458	CD14	1.39316	ENSG00000137441	FGFBP2	1.96276	ENSG00000119138	KLF9	1.12555	ENSG00000109321	AREG	1.6636	ENSG00000100450	GZMH	2.98597	ENSG00000096060	FKBP5	1.69461	ENSG00000169429	CXCL8	3.03064	ENSG00000100097	LGALS1	2.57752	ENSG00000186470	BTN3A2
ENSG00000163191	S100A11	1.34434	ENSG00000090382	LYZ	2.88554	ENSG00000101439	AC020656.5	5.00787	ENSG00000231389	HLA-DPA1	0.914966	ENSG00000100911	PSME2	0.812287	ENSG00000245532	NEAT1	2.88465	ENSG00000198356	ASNA1	2.31065	ENSG00000173221	GLRX	1.55656	ENSG00000106066	CPVL	1.31057	ENSG00000100450	GZMH	1.73103	ENSG00000081041	CXCL2	1.03993	ENSG00000137959	IFI44L	1.55764	ENSG00000124882	EREG	2.73715	ENSG00000160789	LMNA	1.60008	ENSG00000256618	MTRNR2L1	2.98333	ENSG00000198888	MT-ND1	2.49523	ENSG00000184900	SUMO3
ENSG00000099341	PSMD8	1.21004	ENSG00000197728	RPS26	2.67645	ENSG00000127951	AC020656.6	4.77516	ENSG00000163131	CTSS	0.784265	ENSG00000136810	TXN	0.796219	ENSG00000025708	TYMP	2.34211	ENSG00000147872	PLIN2	2.31065	ENSG00000198821	CD247	1.43711	ENSG00000110077	MS4A6A	1.27952	ENSG00000120694	HSPH1	1.37489	ENSG00000166825	ANPEP	0.979387	ENSG00000197728	RPS26	1.53738	ENSG00000124491	F13A1	2.45704	ENSG00000142089	IFITM3	1.35782	ENSG00000140406	TLNRD1	2.98333	ENSG00000103994	ZNF106	2.41525	ENSG00000085719	CPNE3
ENSG00000196154	S100A4	1.21004	ENSG00000120738	EGR1	2.67426	ENSG00000221869	AC020656.7	3.89742	ENSG00000245532	NEAT1	0.686199	ENSG00000196154	S100A4	0.783328	ENSG00000196154	S100A4	2.21603	ENSG00000211679	IGLC3	2.2433	ENSG00000203747	FCGR3A	1.37579	ENSG00000090382	LYZ	1.22681	ENSG00000231389	HLA-DPA1	1.36944	ENSG00000101307	SIRPB1	0.964002	ENSG00000237541	HLA-DQA2	1.42549	ENSG00000169155	ZBTB43	2.32775	ENSG00000157601	MX1	1.09656	ENSG00000186088	GSAP	2.98333	ENSG00000115523	GNLY	2.38926	ENSG00000168172	HOOK3
ENSG00000135535	CD164	1.16697	ENSG00000235576	LINC01871	2.56714	ENSG00000204472	AC020656.8	3.67352	ENSG00000160932	LY6E	0.677501	ENSG00000163191	S100A11	0.762526	ENSG00000143384	MCL1	2.14612	ENSG00000105819	PMPCB	2.22319	ENSG00000100453	GZMB	1.19181	ENSG00000169429	CXCL8	1.15143	ENSG00000232388	SMIM26	1.22289	ENSG00000183486	MX2	0.952636	ENSG00000117228	GBP1	1.2463	ENSG00000137965	IFI44	2.30503	ENSG00000105808	RASA4	1.06254	ENSG00000116871	MAP7D1	2.98333	ENSG00000107968	MAP3K8	2.36278	ENSG00000171860	C3AR1
ENSG00000157873	TNFRSF14	1.16273	ENSG00000163563	MNDA	2.47856	ENSG00000011600	AC020656.9	3.53489	ENSG00000275302	CCL4	0.611854	ENSG00000175550	DRAP1	0.737325	ENSG00000197728	RPS26	2.02457	ENSG00000197728	RPS26	2.12759	ENSG00000011600	TYROBP	1.1865	ENSG00000197405	C5AR1	1.12061	ENSG00000101972	STAG2	1.21646	ENSG00000133106	EPSTI1	0.933832	ENSG00000111912	NCOA7	1.22957	ENSG00000137393	RNF144B	2.25849	ENSG00000132530	XAF1	1.0466	ENSG00000065000	AP3D1	2.8578	ENSG00000277632	CCL3	2.33582	ENSG00000100697	DICER1
ENSG00000125347	IRF1	1.13965	ENSG00000257764	AC020656.1	2.28246	ENSG00000142089	AC020656.10	3.48238	ENSG00000223865	HLA-DPB1	0.602874	ENSG00000054654	SYNE2	0.731473	ENSG00000054654	SYNE2	1.99217	ENSG00000179632	MAF1	2.12623	ENSG00000275302	CCL4	1.17023	ENSG00000118515	SGK1	1.1001	ENSG00000105374	NKG7	1.20046	ENSG00000198502	HLA-DRB5	0.916945	ENSG00000148803	FUOM	1.22696	ENSG00000059804	SLC2A3	2.15218	ENSG00000119138	KLF9	1.03968	ENSG00000187630	DHRS4L2	2.8578	ENSG00000189043	NDUFA4	2.33582	ENSG00000146676	PURB
ENSG00000067900	ROCK1	1.11693	ENSG00000124942	AHNAK	2.05351	ENSG00000204287	AC020656.11	3.44968	ENSG00000100097	LGALS1	0.593996	ENSG00000135046	ANXA1	0.728018	ENSG00000197746	PSAP	1.9752	ENSG00000203667	COX20	2.12623	ENSG00000180644	PRF1	1.12896	ENSG00000172322	CLEC12A	1.04536	ENSG00000135048	CEMIP2	1.15606	ENSG00000132530	XAF1	0.863851	ENSG00000205269	TMEM170B	1.21252	ENSG00000188906	LRRK2	1.90925	ENSG00000124882	EREG	1.00907	ENSG00000060982	BCAT1	2.8578	ENSG00000079246	XRCC5	2.30834	ENSG00000108219	TSPAN14
ENSG00000245532	NEAT1	1.05803	ENSG00000197746	PSAP	2.00796	ENSG00000237541	AC020656.12	3.34745	ENSG00000125148	MT2A	0.574891	ENSG00000118503	TNFAIP3	0.724286	ENSG00000197956	S100A6	1.95384	ENSG00000136997	MYC	2.07361	ENSG00000100300	TSPO	1.10782	ENSG00000245532	NEAT1	0.999139	ENSG00000135404	CD63	1.13869	ENSG00000055332	EIF2AK2	0.808645	ENSG00000002549	LAP3	1.20187	ENSG00000138496	PARP9	1.84608	ENSG00000198502	HLA-DRB5	0.990336	ENSG00000197353	LYPD2	2.8578	ENSG00000159388	BTG2	2.26611	ENSG00000125952	MAX
ENSG00000160213	CSTB	1.04011	ENSG00000025708	TYMP	1.929	ENSG00000163131	AC020656.13	3.244	ENSG00000198763	MT-ND2	0.550104	ENSG00000150093	ITGB1	0.688652	ENSG00000124942	AHNAK	1.94398	ENSG00000185432	METTL7A	2.02115	ENSG00000125868	DSTN	1.08454	ENSG00000127951	FGL2	0.962107	ENSG00000275302	CCL4	1.1341	ENSG00000285437	POLR2J3	0.796536	ENSG00000198502	HLA-DRB5	1.19478	ENSG00000137441	FGFBP2	1.81961	ENSG00000162636	FAM102B	0.98018	ENSG00000126070	AGO3	2.8578	ENSG00000138668	HNRNPD	2.25175	ENSG00000133706	LARS
ENSG00000160014	CALM3	1.0065	ENSG00000245532	NEAT1	1.91136	ENSG00000204482	AC020656.14	3.05007	ENSG00000116824	CD2	0.545744	ENSG00000198763	MT-ND2	0.669618	ENSG00000122862	SRGN	1.93077	ENSG00000102172	SMS	2.02115	ENSG00000100321	SYNGR1	1.07834	ENSG00000011422	PLAUR	0.9234	ENSG00000204388	HSPA1B	1.12696	ENSG00000124882	EREG	0.795278	ENSG00000136689	IL1RN	1.18567	ENSG00000096060	FKBP5	1.76942	ENSG00000237541	HLA-DQA2	0.972313	ENSG00000065526	SPEN	2.8578	ENSG00000123146	ADGRE5	2.22261	ENSG00000111647	UHRF1BP1L
ENSG00000124575	HIST1H1D	0.932501	ENSG00000163131	CTSS	1.74026	ENSG00000231389	AC020656.15	2.81406	ENSG00000100450	GZMH	0.542243	ENSG00000122034	GTF3A	0.663796	ENSG00000130066	SAT1	1.89773	ENSG00000169021	UQCRFS1	1.98872	ENSG00000125148	MT2A	1.03278	ENSG00000100450	GZMH	0.885692	ENSG00000100028	SNRPD3	1.12008	ENSG00000181381	DDX60L	0.782836	ENSG00000166825	ANPEP	1.11621	ENSG00000072274	TFRC	1.73715	ENSG00000160932	LY6E	0.969868	ENSG00000162444	RBP7	2.8578	ENSG00000183726	TMEM50A	2.22261	ENSG00000110077	MS4A6A
ENSG00000128951	DUT	0.920528	ENSG00000187837	HIST1H1C	1.72862	ENSG00000203747	AC020656.16	2.59887	ENSG00000175567	UCP2	0.525611	ENSG00000087074	PPP1R15A	0.64143	ENSG00000118503	TNFAIP3	1.88526	ENSG00000172270	BSG	1.91833	ENSG00000150093	ITGB1	1.00849	ENSG00000030582	GRN	0.834878	ENSG00000213145	CRIP1	1.08071	ENSG00000115415	STAT1	0.781746	ENSG00000157601	MX1	1.06942	ENSG00000111331	OAS3	1.67522	ENSG00000172939	OXSR1	0.90428	ENSG00000142188	TMEM50B	2.7203	ENSG00000198886	MT-ND4	2.20568	ENSG00000158517	NCF1
ENSG00000173141	MRPL57	0.910475	ENSG00000122033	MTIF3	1.69683	ENSG00000197746	AC020656.17	2.54577	ENSG00000127603	MACF1	0.500623	ENSG00000124942	AHNAK	0.638922	ENSG00000198888	MT-ND1	1.75524	ENSG00000214078	CPNE1	1.89561	ENSG00000175567	UCP2	0.975769	ENSG00000026025	VIM	0.818106	ENSG00000131495	NDUFA2	1.07896	ENSG00000237541	HLA-DQA2	0.74795	ENSG00000148730	EIF4EBP2	1.05454	ENSG00000118564	FBXL5	1.67205	ENSG00000186407	CD300E	0.902583	ENSG00000130726	TRIM28	2.7203	ENSG00000159128	IFNGR2	2.16249	ENSG00000062650	WAPL
ENSG00000139644	TMBIM6	0.901913	ENSG00000102007	PLP2	1.65835	ENSG00000245532	AC020656.18	2.49445	ENSG00000109861	CTSC	0.493284	ENSG00000136732	GYPC	0.634232	ENSG00000198763	MT-ND2	1.70705	ENSG00000135048	CEMIP2	1.89561	ENSG00000277632	CCL3	0.899385	ENSG00000175567	UCP2	0.793506	ENSG00000175567	UCP2	1.07314	ENSG00000188906	LRRK2	0.742295	ENSG00000177575	CD163	1.01587	ENSG00000197728	RPS26	1.65138	ENSG00000185950	IRS2	0.902583	ENSG00000134153	EMC7	2.7203	ENSG00000065978	YBX1	2.16249	ENSG00000147526	TACC1
ENSG00000145247	OCIAD2	0.898833	ENSG00000163191	S100A11	1.61253	ENSG00000105835	AC020656.19	2.23599	ENSG00000099624	ATP5F1D	0.485669	ENSG00000130066	SAT1	0.620916	ENSG00000228253	MT-ATP8	1.61224	ENSG00000105254	TBCB	1.87769	ENSG00000084207	GSTP1	0.892965	ENSG00000142089	IFITM3	0.783813	ENSG00000255112	CHMP1B	1.05296	ENSG00000180817	PPA1	0.723883	ENSG00000173230	GOLGB1	0.984967	ENSG00000157601	MX1	1.5931	ENSG00000133657	ATP13A3	0.897024	ENSG00000073614	KDM5A	2.7203	ENSG00000186407	CD300E	2.13146	ENSG00000169967	MAP3K2
ENSG00000111775	COX6A1	0.888107	ENSG00000213145	CRIP1	1.43612	ENSG00000197728	AC020656.20	2.21679	ENSG00000125868	DSTN	0.480052	ENSG00000170345	FOS	0.609445	ENSG00000198804	MT-CO1	1.52912	ENSG00000115825	PRKD3	1.85122	ENSG00000163131	CTSS	0.890529	ENSG00000025708	TYMP	0.78336	ENSG00000115523	GNLY	1.02813	ENSG00000197081	IGF2R	0.701324	ENSG00000115415	STAT1	0.984967	ENSG00000187193	MT1X	1.58042	ENSG00000145632	PLK2	0.88707	ENSG00000013563	DNASE1L1	2.7203	ENSG00000228474	OST4	2.13146	ENSG00000249437	NAIP
ENSG00000170345	FOS	0.885763	ENSG00000105835	NAMPT	1.43447	ENSG00000019582	AC020656.21	2.14198	ENSG00000019582	CD74	0.467681	ENSG00000198888	MT-ND1	0.561766	ENSG00000270022	Z93241.1	1.40167	ENSG00000118308	LRMP	1.81589	ENSG00000172216	CEBPB	0.871391	ENSG00000125868	DSTN	0.766514	ENSG00000067064	IDI1	1.00857	ENSG00000111144	LTA4H	0.68625	ENSG00000188906	LRRK2	0.962114	ENSG00000164442	CITED2	1.58042	ENSG00000115590	IL1R2	0.880983	ENSG00000049860	HEXB	2.7203	ENSG00000147526	TACC1	2.09975	ENSG00000146007	ZMAT2
ENSG00000136732	GYPC	0.873	ENSG00000135046	ANXA1	1.37307	ENSG00000115956	AC020656.22	1.99173	ENSG00000178980	SELENOW	0.465925	ENSG00000026297	RNASET2	0.546063	ENSG00000198727	MT-CYB	1.36671	ENSG00000198833	UBE2J1	1.78014	ENSG00000169583	CLIC3	0.863456	ENSG00000125148	MT2A	0.763332	ENSG00000142634	EFHD2	0.9506	ENSG00000175567	UCP2	0.685542	ENSG00000161203	AP2M1	0.960794	ENSG00000169895	SYAP1	1.55657	ENSG00000057657	PRDM1	0.852889	ENSG00000181788	SIAH2	2.7203	ENSG00000070831	CDC42	2.08902	ENSG00000114573	ATP6V1A
ENSG00000213145	CRIP1	0.838941	ENSG00000164691	TAGAP	1.34105	ENSG00000025708	AC020656.23	1.94851	ENSG00000160255	ITGB2	0.444457	ENSG00000002586	CD99	0.545307	ENSG00000198840	MT-ND3	1.28997	ENSG00000132704	FCRL2	1.72569	ENSG00000168209	DDIT4	0.836681	ENSG00000112096	SOD2	0.756234	ENSG00000164463	CREBRF	0.941069	ENSG00000160932	LY6E	0.677787	ENSG00000145012	LPP	0.943448	ENSG00000145012	LPP	1.52415	ENSG00000152229	PSTPIP2	0.845604	ENSG00000136536	MARCHF7	2.7203	ENSG00000104894	CD37	2.06733	ENSG00000096060	FKBP5
ENSG00000114416	FXR1	0.831523	ENSG00000011600	TYROBP	1.32252	ENSG00000196126	AC020656.24	1.82449	ENSG00000115165	CYTIP	0.443345	ENSG00000132002	DNAJB1	0.538017	ENSG00000269028	MTRNR2L12	1.27773	ENSG00000136573	BLK	1.68616	ENSG00000101084	RAB5IF	0.81691	ENSG00000231389	HLA-DPA1	0.755009	ENSG00000019582	CD74	0.913898	ENSG00000163823	CCR1	0.663956	ENSG00000135018	UBQLN1	0.932879	ENSG00000205413	SAMD9	1.45704	ENSG00000164687	FABP5	0.842197	ENSG00000158062	UBXN11	2.7203	ENSG00000088986	DYNLL1	2.06733	ENSG00000170275	CRTAP
ENSG00000184076	UQCR10	0.829763	ENSG00000130066	SAT1	1.29485	ENSG00000130066	AC020656.25	1.79412	ENSG00000222041	CYTOR	0.43272	ENSG00000092010	PSME1	0.538017	ENSG00000198938	MT-CO3	1.26073	ENSG00000213722	DDAH2	1.67322	ENSG00000160255	ITGB2	0.793934	ENSG00000101439	CST3	0.74613	ENSG00000187118	CMC1	0.910668	ENSG00000126709	IFI6	0.656905	ENSG00000096060	FKBP5	0.914257	ENSG00000129757	CDKN1C	1.4411	ENSG00000143546	S100A8	0.841788	ENSG00000141524	TMC6	2.56829	ENSG00000184897	H1FX	2.06733	ENSG00000126709	IFI6
ENSG00000068831	RASGRP2	0.828164	ENSG00000123146	ADGRE5	1.29485	ENSG00000223865	AC020656.26	1.63681	ENSG00000235576	LINC01871	0.432295	ENSG00000183172	SMDT1	0.528739	ENSG00000255823	MTRNR2L8	1.20611	ENSG00000023734	STRAP	1.61021	ENSG00000160310	PRMT2	0.791551	ENSG00000163131	CTSS	0.740331	ENSG00000083799	CYLD	0.870758	ENSG00000090376	IRAK3	0.653766	ENSG00000101916	TLR8	0.899493	ENSG00000168394	TAP1	1.39384	ENSG00000154001	PPP2R5E	0.82129	ENSG00000188906	LRRK2	2.52765	ENSG00000115355	CCDC88A	2.06733	ENSG00000184602	SNN
ENSG00000002586	CD99	0.828164	ENSG00000059804	SLC2A3	1.27692	ENSG00000028137	AC020656.27	1.60103	ENSG00000172116	CD8B	0.429437	ENSG00000122862	SRGN	0.511013	ENSG00000198786	MT-ND5	1.18492	ENSG00000105926	MPP6	1.61021	ENSG00000107742	SPOCK2	0.771565	ENSG00000143546	S100A8	0.722842	ENSG00000160213	CSTB	0.86263	ENSG00000137462	TLR2	0.637291	ENSG00000118503	TNFAIP3	0.893874	ENSG00000151726	ACSL1	1.38992	ENSG00000125148	MT2A	0.818123	ENSG00000101307	SIRPB1	2.39837	ENSG00000065135	GNAI3	2.06733	ENSG00000159377	PSMB4
ENSG00000034713	GABARAPL2	0.825371	ENSG00000160255	ITGB2	1.26966	ENSG00000140575	AC020656.28	1.58112	ENSG00000034510	TMSB10	0.423968	ENSG00000157514	TSC22D3	0.507257	ENSG00000198886	MT-ND4	1.15075	ENSG00000137478	FCHSD2	1.52638	ENSG00000112576	CCND3	0.760843	ENSG00000038427	VCAN	0.718704	ENSG00000133574	GIMAP4	0.86263	ENSG00000162645	GBP2	0.630363	ENSG00000169926	KLF13	0.888694	ENSG00000039319	ZFYVE16	1.38008	ENSG00000055332	EIF2AK2	0.818123	ENSG00000122986	HVCN1	2.39837	ENSG00000136167	LCP1	2.04086	ENSG00000131759	RARA
ENSG00000067082	KLF6	0.794998	ENSG00000067082	KLF6	1.26325	ENSG00000100450	AC020656.29	1.55091	ENSG00000196154	S100A4	0.423178	ENSG00000204642	HLA-F	0.494927	ENSG00000212907	MT-ND4L	1.146	ENSG00000145734	BDP1	1.52638	ENSG00000235576	LINC01871	0.754728	ENSG00000204287	HLA-DRA	0.707541	ENSG00000197448	GSTK1	0.86263	ENSG00000265972	TXNIP	0.621678	ENSG00000169508	GPR183	0.881145	ENSG00000044115	CTNNA1	1.3624	ENSG00000072501	SMC1A	0.81227	ENSG00000137393	RNF144B	2.39837	ENSG00000160014	CALM3	2.03416	ENSG00000139970	RTN1
ENSG00000115484	CCT4	0.794998	ENSG00000171988	JMJD1C	1.26044	ENSG00000163931	AC020656.30	1.5445	ENSG00000265972	TXNIP	0.417801	ENSG00000026025	VIM	0.482714	ENSG00000198899	MT-ATP6	1.14391	ENSG00000125910	S1PR4	1.51924	ENSG00000116741	RGS2	0.743258	ENSG00000160932	LY6E	0.695004	ENSG00000196924	FLNA	0.862278	ENSG00000245532	NEAT1	0.616069	ENSG00000162645	GBP2	0.875938	ENSG00000133106	EPSTI1	1.35012	ENSG00000133106	EPSTI1	0.81158	ENSG00000163221	S100A12	2.39837	ENSG00000090376	IRAK3	2.01729	ENSG00000149212	SESN3
ENSG00000215021	PHB2	0.794998	ENSG00000122257	RBBP6	1.23595	ENSG00000169554	AC020656.31	1.47031	ENSG00000111537	IFNG	0.412178	ENSG00000110848	CD69	0.482293	ENSG00000163131	CTSS	1.10203	ENSG00000213145	CRIP1	1.51095	ENSG00000100097	LGALS1	0.738731	ENSG00000105835	NAMPT	0.683091	ENSG00000153563	CD8A	0.860317	ENSG00000213145	CRIP1	0.614418	ENSG00000110395	CBL	0.854405	ENSG00000198502	HLA-DRB5	1.34084	ENSG00000105339	DENND3	0.804526	ENSG00000261371	PECAM1	2.3459	ENSG00000064601	CTSA	2.00021	ENSG00000164830	OXR1
ENSG00000132432	SEC61G	0.794998	ENSG00000197694	SPTAN1	1.23184	ENSG00000105374	AC020656.32	1.43495	ENSG00000150093	ITGB1	0.408072	ENSG00000078304	PPP2R5C	0.476561	ENSG00000198712	MT-CO2	1.07556	ENSG00000130724	CHMP2A	1.5033	ENSG00000115165	CYTIP	0.72062	ENSG00000165168	CYBB	0.680246	ENSG00000205531	NAP1L4	0.842395	ENSG00000142089	IFITM3	0.605373	ENSG00000101307	SIRPB1	0.844063	ENSG00000177409	SAMD9L	1.34	ENSG00000143702	CEP170	0.795755	ENSG00000104093	DMXL2	2.33697	ENSG00000140612	SEC11A	2.00021	ENSG00000138433	CIR1
ENSG00000111832	RWDD1	0.771151	ENSG00000144802	NFKBIZ	1.20109	ENSG00000100453	AC020656.33	1.38669	ENSG00000235162	C12orf75	0.405141	ENSG00000128340	RAC2	0.471431	ENSG00000026025	VIM	1.04156	ENSG00000134717	BTF3L4	1.5033	ENSG00000021355	SERPINB1	0.712097	ENSG00000019582	CD74	0.679362	ENSG00000197971	MBP	0.839968	ENSG00000177575	CD163	0.600285	ENSG00000285437	POLR2J3	0.837127	ENSG00000111335	OAS2	1.33774	ENSG00000163221	S100A12	0.790109	ENSG00000183486	MX2	2.30526	ENSG00000013441	CLK1	1.96545	ENSG00000055332	EIF2AK2
ENSG00000183172	SMDT1	0.763971	ENSG00000125148	MT2A	1.18381	ENSG00000125148	AC020656.34	1.34715	ENSG00000100911	PSME2	0.4042	ENSG00000145675	PIK3R1	0.469845	ENSG00000067082	KLF6	0.952831	ENSG00000185043	CIB1	1.46563	ENSG00000169230	PRELID1	0.711932	ENSG00000120738	EGR1	0.678975	ENSG00000154723	ATP5PF	0.811954	ENSG00000133657	ATP13A3	0.587683	ENSG00000171522	PTGER4	0.831769	ENSG00000181381	DDX60L	1.32428	ENSG00000175826	CTDNEP1	0.788376	ENSG00000196730	DAPK1	2.30526	ENSG00000140379	BCL2A1	1.96545	ENSG00000123684	LPGAT1
ENSG00000112695	COX7A2	0.758161	ENSG00000054654	SYNE2	1.17908	ENSG00000143110	AC020656.35	1.309	ENSG00000204525	HLA-C	0.39633	ENSG00000124795	DEK	0.469845	ENSG00000111640	GAPDH	0.949502	ENSG00000106355	LSM5	1.4565	ENSG00000196154	S100A4	0.697231	ENSG00000132334	PTPRE	0.674075	ENSG00000077984	CST7	0.811954	ENSG00000100596	SPTLC2	0.586474	ENSG00000169895	SYAP1	0.812585	ENSG00000181722	ZBTB20	1.31265	ENSG00000169756	LIMS1	0.775709	ENSG00000182054	IDH2	2.20572	ENSG00000198755	RPL10A	1.96545	ENSG00000158825	CDA
ENSG00000172115	CYCS	0.730867	ENSG00000197102	DYNC1H1	1.15997	ENSG00000167996	AC020656.36	1.30298	ENSG00000162704	ARPC5	0.391139	ENSG00000158710	TAGLN2	0.466023	ENSG00000026508	CD44	0.927308	ENSG00000008324	SS18L2	1.45267	ENSG00000115738	ID2	0.695897	ENSG00000197629	MPEG1	0.654667	ENSG00000078304	PPP2R5C	0.809036	ENSG00000111275	ALDH2	0.579506	ENSG00000138061	CYP1B1	0.810135	ENSG00000117228	GBP1	1.28711	ENSG00000131374	TBC1D5	0.774796	ENSG00000055609	KMT2C	2.20572	ENSG00000162444	RBP7	1.94775	ENSG00000141429	GALNT1
ENSG00000241343	RPL36A	0.727021	ENSG00000069667	RORA	1.10289	ENSG00000235576	AC020656.37	1.23846	ENSG00000198888	MT-ND1	0.386576	ENSG00000099860	GADD45B	0.459472	ENSG00000169045	HNRNPH1	0.842147	ENSG00000107290	SETX	1.44558	ENSG00000143119	CD53	0.675294	ENSG00000172243	CLEC7A	0.643301	ENSG00000185862	EVI2B	0.807849	ENSG00000145012	LPP	0.570705	ENSG00000105967	TFEC	0.807099	ENSG00000180776	ZDHHC20	1.24662	ENSG00000120738	EGR1	0.773419	ENSG00000118482	PHF3	2.20572	ENSG00000198727	MT-CYB	1.93963	ENSG00000198502	HLA-DRB5
ENSG00000240065	PSMB9	0.724608	ENSG00000067225	PKM	1.08777	ENSG00000137441	AC020656.38	1.21973	ENSG00000142669	SH3BGRL3	0.384125	ENSG00000143119	CD53	0.459341	ENSG00000198695	MT-ND6	0.788211	ENSG00000198502	HLA-DRB5	1.44392	ENSG00000204525	HLA-C	0.673588	ENSG00000131981	LGALS3	0.641574	ENSG00000271503	CCL5	0.805401	ENSG00000059804	SLC2A3	0.562729	ENSG00000183486	MX2	0.79684	ENSG00000008517	IL32	1.23465	ENSG00000135821	GLUL	0.766776	ENSG00000164211	STARD4	2.20572	ENSG00000132965	ALOX5AP	1.92982	ENSG00000163823	CCR1
ENSG00000076662	ICAM3	0.701888	ENSG00000107372	ZFAND5	1.08428	ENSG00000172216	AC020656.39	1.17917	ENSG00000101182	PSMA7	0.376626	ENSG00000269893	SNHG8	0.457751	ENSG00000161547	SRSF2	0.749279	ENSG00000237541	HLA-DQA2	1.44071	ENSG00000134996	OSTF1	0.672366	ENSG00000137441	FGFBP2	0.637499	ENSG00000204287	HLA-DRA	0.801423	ENSG00000148730	EIF4EBP2	0.559744	ENSG00000105339	DENND3	0.790442	ENSG00000128228	SDF2L1	1.23465	ENSG00000133318	RTN3	0.74529	ENSG00000058262	SEC61A1	2.20572	ENSG00000241468	ATP5MF	1.92982	ENSG00000162645	GBP2
ENSG00000117592	PRDX6	0.695462	ENSG00000124575	HIST1H1D	1.07912	ENSG00000087086	AC020656.40	1.1715	ENSG00000183172	SMDT1	0.371716	ENSG00000213719	CLIC1	0.456425	ENSG00000119707	RBM25	0.715332	ENSG00000108639	SYNGR2	1.43618	ENSG00000179218	CALR	0.625842	ENSG00000185650	ZFP36L1	0.629173	ENSG00000132965	ALOX5AP	0.800574	ENSG00000152229	PSTPIP2	0.55479	ENSG00000109133	TMEM33	0.784016	ENSG00000124214	STAU1	1.2104	ENSG00000177409	SAMD9L	0.739172	ENSG00000117362	APH1A	2.20572	ENSG00000231925	TAPBP	1.92982	ENSG00000143546	S100A8
ENSG00000204569	PPP1R10	0.688082	ENSG00000153113	CAST	1.0505	ENSG00000084207	AC020656.41	1.16821	ENSG00000145649	GZMA	0.369274	ENSG00000106803	SEC61B	0.456039	ENSG00000117616	RSRP1	0.702096	ENSG00000105379	ETFB	1.40376	ENSG00000245532	NEAT1	0.61107	ENSG00000112149	CD83	0.623809	ENSG00000243147	MRPL33	0.797705	ENSG00000172322	CLEC12A	0.554274	ENSG00000138279	ANXA7	0.769857	ENSG00000108582	CPD	1.2104	ENSG00000184900	SUMO3	0.73827	ENSG00000125538	IL1B	2.18264	ENSG00000018280	SLC11A1	1.90558	ENSG00000102910	LONP2
ENSG00000213203	GIMAP1	0.67952	ENSG00000227507	LTB	1.05037	ENSG00000160255	AC020656.42	1.13995	ENSG00000204642	HLA-F	0.35909	ENSG00000118640	VAMP8	0.446277	ENSG00000099860	GADD45B	0.636858	ENSG00000130312	MRPL34	1.40376	ENSG00000163191	S100A11	0.60885	ENSG00000167996	FTH1	0.594162	ENSG00000172543	CTSW	0.795574	ENSG00000197329	PELI1	0.544876	ENSG00000170525	PFKFB3	0.765868	ENSG00000165671	NSD1	1.2104	ENSG00000141367	CLTC	0.736069	ENSG00000148737	TCF7L2	2.17096	ENSG00000198786	MT-ND5	1.90252	ENSG00000176953	NFATC2IP
ENSG00000137876	RSL24D1	0.663753	ENSG00000140575	IQGAP1	1.04996	ENSG00000103187	AC020656.43	1.11124	ENSG00000197956	S100A6	0.344158	ENSG00000197747	S100A10	0.441731	ENSG00000134294	SLC38A2	0.621697	ENSG00000166669	ATF7IP2	1.39311	ENSG00000134539	KLRD1	0.602197	ENSG00000166927	MS4A7	0.588557	ENSG00000197061	HIST1H4C	0.786361	ENSG00000152818	UTRN	0.536513	ENSG00000113916	BCL6	0.758925	ENSG00000133657	ATP13A3	1.17324	ENSG00000198053	SIRPA	0.721505	ENSG00000160216	AGPAT3	2.09881	ENSG00000167460	TPM4	1.8933	ENSG00000132485	ZRANB2
ENSG00000185262	UBALD2	0.662547	ENSG00000168234	TTC39C	1.03967	ENSG00000131236	AC020656.44	1.08102	ENSG00000157514	TSC22D3	0.341989	ENSG00000166598	HSP90B1	0.439645	ENSG00000089280	FUS	0.583229	ENSG00000161929	SCIMP	1.38465	ENSG00000140575	IQGAP1	0.598284	ENSG00000182718	ANXA2	0.587698	ENSG00000087088	BAX	0.785481	ENSG00000109321	AREG	0.535343	ENSG00000110717	NDUFS8	0.751448	ENSG00000081041	CXCL2	1.15748	ENSG00000126709	IFI6	0.721505	ENSG00000157637	SLC38A10	2.09881	ENSG00000167863	ATP5PD	1.8933	ENSG00000227507	LTB
ENSG00000125977	EIF2S2	0.657494	ENSG00000109046	WSB1	1.01389	ENSG00000116741	AC020656.45	1.07556	ENSG00000163479	SSR2	0.341572	ENSG00000142669	SH3BGRL3	0.434281	ENSG00000100664	EIF5	0.582948	ENSG00000211896	IGHG1	1.38465	ENSG00000110934	BIN2	0.596282	ENSG00000197956	S100A6	0.587147	ENSG00000162924	REL	0.785481	ENSG00000035403	VCL	0.534406	ENSG00000171862	PTEN	0.743723	ENSG00000113369	ARRDC3	1.14445	ENSG00000183486	MX2	0.718587	ENSG00000033800	PIAS1	2.09881	ENSG00000197102	DYNC1H1	1.8933	ENSG00000167460	TPM4
ENSG00000180817	PPA1	0.657494	ENSG00000118971	CCND2	1.00944	ENSG00000109861	AC020656.46	1.05284	ENSG00000102879	CORO1A	0.341011	ENSG00000112514	CUTA	0.425864	ENSG00000163660	CCNL1	0.568491	ENSG00000169062	UPF3A	1.35646	ENSG00000265972	TXNIP	0.585745	ENSG00000204103	MAFB	0.571669	ENSG00000127528	KLF2	0.777482	ENSG00000183172	SMDT1	0.530608	ENSG00000197081	IGF2R	0.741532	ENSG00000129071	MBD4	1.13511	ENSG00000090376	IRAK3	0.718243	ENSG00000076513	ANKRD13A	2.09881	ENSG00000137161	CNPY3	1.8933	ENSG00000167470	MIDN
ENSG00000026297	RNASET2	0.657494	ENSG00000196154	S100A4	1.00678	ENSG00000179218	AC020656.47	1.03646	ENSG00000228253	MT-ATP8	0.337976	ENSG00000204525	HLA-C	0.423795	ENSG00000157514	TSC22D3	0.546478	ENSG00000015285	WAS	1.35646	ENSG00000127603	MACF1	0.583226	ENSG00000177156	TALDO1	0.568716	ENSG00000164104	HMGB2	0.763455	ENSG00000002549	LAP3	0.529004	ENSG00000171159	C9orf16	0.741311	ENSG00000166164	BRD7	1.12542	ENSG00000049860	HEXB	0.715246	ENSG00000076641	PAG1	2.09881	ENSG00000198189	HSD17B11	1.85582	ENSG00000164405	UQCRQ
ENSG00000164032	H2AFZ	0.653642	ENSG00000204256	BRD2	1.00206	ENSG00000127603	AC020656.48	1.02805	ENSG00000026025	VIM	0.337896	ENSG00000133321	RARRES3	0.417953	ENSG00000081320	STK17B	0.542865	ENSG00000174780	SRP72	1.31065	ENSG00000172183	ISG20	0.579546	ENSG00000119655	NPC2	0.567971	ENSG00000143774	GUK1	0.756569	ENSG00000197943	PLCG2	0.522792	ENSG00000100364	KIAA0930	0.72045	ENSG00000156587	UBE2L6	1.11681	ENSG00000109321	AREG	0.712554	ENSG00000126005	MMP24OS	2.06133	ENSG00000198804	MT-CO1	1.8305	ENSG00000183172	SMDT1
ENSG00000183648	NDUFB1	0.635799	ENSG00000116824	CD2	1.00119	ENSG00000136238	AC020656.49	1.02193	ENSG00000167996	FTH1	0.334201	ENSG00000173436	MINOS1	0.40762	ENSG00000211679	IGLC3	0.52481	ENSG00000115541	HSPE1	1.29273	ENSG00000051523	CYBA	0.574448	ENSG00000066336	SPI1	0.560789	ENSG00000145649	GZMA	0.753995	ENSG00000120868	APAF1	0.522404	ENSG00000132530	XAF1	0.718562	ENSG00000132530	XAF1	1.10911	ENSG00000168461	RAB31	0.708315	ENSG00000188290	HES4	1.98333	ENSG00000066336	SPI1	1.81735	ENSG00000118689	FOXO3
ENSG00000173915	ATP5MD	0.625073	ENSG00000170345	FOS	0.999495	ENSG00000164111	AC020656.50	1.01644	ENSG00000269893	SNHG8	0.333322	ENSG00000163463	KRTCAP2	0.40475	ENSG00000163466	ARPC2	0.497509	ENSG00000147905	ZCCHC7	1.26626	ENSG00000171476	HOPX	0.549265	ENSG00000103187	COTL1	0.557566	ENSG00000182718	ANXA2	0.753401	ENSG00000157514	TSC22D3	0.521272	ENSG00000181381	DDX60L	0.717706	ENSG00000205269	TMEM170B	1.10911	ENSG00000123636	BAZ2B	0.702646	ENSG00000063245	EPN1	1.98333	ENSG00000138670	RASGEF1B	1.81735	ENSG00000151726	ACSL1
ENSG00000107742	SPOCK2	0.625073	ENSG00000128016	ZFP36	0.993676	ENSG00000164713	AC020656.51	0.979373	ENSG00000132002	DNAJB1	0.327448	ENSG00000086061	DNAJA1	0.40475	ENSG00000149311	ATM	0.481346	ENSG00000023902	PLEKHO1	1.25176	ENSG00000197956	S100A6	0.542952	ENSG00000163563	MNDA	0.553581	ENSG00000125148	MT2A	0.748107	ENSG00000171298	GAA	0.518324	ENSG00000143622	RIT1	0.701174	ENSG00000057657	PRDM1	1.10911	ENSG00000130779	CLIP1	0.702646	ENSG00000141867	BRD4	1.98333	ENSG00000271503	CCL5	1.77782	ENSG00000138688	KIAA1109
ENSG00000171530	TBCA	0.61666	ENSG00000026297	RNASET2	0.991654	ENSG00000114353	AC020656.52	0.962773	ENSG00000176340	COX8A	0.318721	ENSG00000166794	PPIB	0.395634	ENSG00000167996	FTH1	0.449833	ENSG00000176788	BASP1	1.24026	ENSG00000105374	NKG7	0.535839	ENSG00000198763	MT-ND2	0.543781	ENSG00000197943	PLCG2	0.746553	ENSG00000266412	NCOA4	0.51824	ENSG00000205937	RNPS1	0.699895	ENSG00000114439	BBX	1.10034	ENSG00000269893	SNHG8	0.698294	ENSG00000100596	SPTLC2	1.98333	ENSG00000178719	GRINA	1.77782	ENSG00000133657	ATP13A3
ENSG00000111678	C12orf57	0.595926	ENSG00000122862	SRGN	0.980318	ENSG00000173221	AC020656.53	0.933488	ENSG00000076662	ICAM3	0.316639	ENSG00000187239	FNBP1	0.390675	ENSG00000117523	PRRC2C	0.441767	ENSG00000179912	R3HDM2	1.22319	ENSG00000100450	GZMH	0.53424	ENSG00000198888	MT-ND1	0.524581	ENSG00000111775	COX6A1	0.724636	ENSG00000269893	SNHG8	0.515934	ENSG00000035403	VCL	0.690906	ENSG00000173575	CHD2	1.09714	ENSG00000110077	MS4A6A	0.695648	ENSG00000171860	C3AR1	1.98333	ENSG00000055609	KMT2C	1.77782	ENSG00000142684	ZNF593
ENSG00000115091	ACTR3	0.593364	ENSG00000100097	LGALS1	0.953809	ENSG00000131171	AC020656.54	0.920094	ENSG00000111640	GAPDH	0.314406	ENSG00000197956	S100A6	0.388965	ENSG00000125740	FOSB	0.438623	ENSG00000145337	PYURF	1.22319	ENSG00000145649	GZMA	0.526799	ENSG00000150093	ITGB1	0.521189	ENSG00000170906	NDUFA3	0.71416	ENSG00000108582	CPD	0.5132	ENSG00000266412	NCOA4	0.680564	ENSG00000186407	CD300E	1.08826	ENSG00000140455	USP3	0.692304	ENSG00000136869	TLR4	1.98333	ENSG00000163565	IFI16	1.77782	ENSG00000137462	TLR2
ENSG00000142546	NOSIP	0.587402	ENSG00000134248	LAMTOR5	0.953809	ENSG00000048740	AC020656.55	0.90192	ENSG00000169442	CD52	0.307642	ENSG00000241343	RPL36A	0.384734	ENSG00000131051	RBM39	0.401501	ENSG00000143924	EML4	1.22319	ENSG00000153113	CAST	0.516303	ENSG00000169230	PRELID1	0.519473	ENSG00000092820	EZR	0.710569	ENSG00000131724	IL13RA1	0.511788	ENSG00000213203	GIMAP1	0.680564	ENSG00000049860	HEXB	1.08709	ENSG00000172322	CLEC12A	0.689935	ENSG00000005844	ITGAL	1.98333	ENSG00000255823	MTRNR2L8	1.75764	ENSG00000141580	WDR45B
ENSG00000089220	PEBP1	0.57868	ENSG00000002586	CD99	0.952084	ENSG00000105887	AC020656.56	0.898186	ENSG00000147123	NDUFB11	0.293744	ENSG00000197061	HIST1H4C	0.383021	ENSG00000136758	YME1L1	0.395197	ENSG00000116741	RGS2	1.18727	ENSG00000162704	ARPC5	0.510945	ENSG00000116741	RGS2	0.518144	ENSG00000160255	ITGB2	0.702464	ENSG00000158869	FCER1G	0.501704	ENSG00000184897	H1FX	0.67785	ENSG00000132780	NASP	1.07853	ENSG00000100813	ACIN1	0.684944	ENSG00000197728	RPS26	1.92444	ENSG00000197728	RPS26	1.74891	ENSG00000141367	CLTC
ENSG00000136938	ANP32B	0.577767	ENSG00000087074	PPP1R15A	0.951154	ENSG00000145649	AC020656.57	0.888374	ENSG00000162511	LAPTM5	0.289594	ENSG00000103363	ELOB	0.377997	ENSG00000089737	DDX24	0.391443	ENSG00000165312	OTUD1	1.18137	ENSG00000100612	DHRS7	0.510464	ENSG00000197746	PSAP	0.51616	ENSG00000116824	CD2	0.691324	ENSG00000112576	CCND3	0.499527	ENSG00000081154	PCNP	0.670868	ENSG00000101596	SMCHD1	1.07853	ENSG00000139687	RB1	0.681272	ENSG00000243449	C4orf48	1.90087	ENSG00000100612	DHRS7	1.73718	ENSG00000086065	CHMP5
ENSG00000147274	RBMX	0.572605	ENSG00000091039	OSBPL8	0.933779	ENSG00000153113	AC020656.58	0.86571	ENSG00000106829	TLE4	0.287225	ENSG00000169442	CD52	0.372705	ENSG00000080824	HSP90AA1	0.390005	ENSG00000134453	RBM17	1.17315	ENSG00000142669	SH3BGRL3	0.506472	ENSG00000223865	HLA-DPB1	0.514893	ENSG00000217555	CKLF	0.670492	ENSG00000185022	MAFF	0.493125	ENSG00000152291	TGOLN2	0.670148	ENSG00000197102	DYNC1H1	1.07595	ENSG00000245532	NEAT1	0.679907	ENSG00000187446	CHP1	1.90087	ENSG00000168172	HOOK3	1.73718	ENSG00000146112	PPP1R18
ENSG00000177733	HNRNPA0	0.572605	ENSG00000150093	ITGB1	0.931351	ENSG00000111229	AC020656.59	0.842813	ENSG00000136167	LCP1	0.286653	ENSG00000114353	GNAI2	0.371757	ENSG00000159388	BTG2	0.374091	ENSG00000143222	UFC1	1.17315	ENSG00000176340	COX8A	0.503226	ENSG00000142669	SH3BGRL3	0.514449	ENSG00000183918	SH2D1A	0.670492	ENSG00000163171	CDC42EP3	0.487492	ENSG00000205413	SAMD9	0.669373	ENSG00000055332	EIF2AK2	1.06472	ENSG00000213523	SRA1	0.677111	ENSG00000108061	SHOC2	1.90087	ENSG00000158869	FCER1G	1.71642	ENSG00000129351	ILF3
ENSG00000166794	PPIB	0.566179	ENSG00000127603	MACF1	0.925612	ENSG00000134308	AC020656.60	0.842514	ENSG00000163191	S100A11	0.284899	ENSG00000142227	EMP3	0.371197	ENSG00000110321	EIF4G2	0.372444	ENSG00000138639	ARHGAP24	1.15865	ENSG00000172543	CTSW	0.501381	ENSG00000196154	S100A4	0.510754	ENSG00000172183	ISG20	0.667308	ENSG00000173744	AGFG1	0.482875	ENSG00000221963	APOL6	0.651242	ENSG00000179912	R3HDM2	1.06472	ENSG00000145416	2021-03-01	0.672589	ENSG00000266412	NCOA4	1.90087	ENSG00000198840	MT-ND3	1.71429	ENSG00000120594	PLXDC2
ENSG00000038219	BOD1L1	0.562337	ENSG00000250479	CHCHD10	0.912512	ENSG00000087088	AC020656.61	0.824487	ENSG00000198786	MT-ND5	0.282022	ENSG00000173915	ATP5MD	0.36516	ENSG00000109332	UBE2D3	0.349204	ENSG00000265241	RBM8A	1.15537	ENSG00000155368	DBI	0.493914	ENSG00000100097	LGALS1	0.501476	ENSG00000175550	DRAP1	0.653031	ENSG00000155629	PIK3AP1	0.480516	ENSG00000163823	CCR1	0.645818	ENSG00000185475	TMEM179B	1.06472	ENSG00000214046	SMIM7	0.672272	ENSG00000106780	MEGF9	1.90087	ENSG00000173559	NABP1	1.69536	ENSG00000143420	ENSA
ENSG00000229833	PET100	0.55399	ENSG00000228253	MT-ATP8	0.90769	ENSG00000127314	AC020656.62	0.82254	ENSG00000084207	GSTP1	0.281973	ENSG00000240972	MIF	0.360883	ENSG00000143549	TPM3	0.345809	ENSG00000090104	RGS1	1.12845	ENSG00000197943	PLCG2	0.475081	ENSG00000163931	TKT	0.495377	ENSG00000132002	DNAJB1	0.652874	ENSG00000143013	LMO4	0.480216	ENSG00000121316	PLBD1	0.643985	ENSG00000074842	MYDGF	1.05178	ENSG00000116044	NFE2L2	0.670224	ENSG00000038427	VCAN	1.90087	ENSG00000025708	TYMP	1.68827	ENSG00000169508	GPR183
ENSG00000127540	UQCR11	0.55399	ENSG00000169508	GPR183	0.90088	ENSG00000122862	AC020656.63	0.82108	ENSG00000134308	YWHAQ	0.27776	ENSG00000177606	JUN	0.359763	ENSG00000142227	EMP3	0.345494	ENSG00000129968	ABHD17A	1.12302	ENSG00000002586	CD99	0.469151	ENSG00000277443	MARCKS	0.485715	ENSG00000163191	S100A11	0.652782	ENSG00000169429	CXCL8	0.477636	ENSG00000265972	TXNIP	0.64132	ENSG00000112576	CCND3	1.04561	ENSG00000121858	TNFSF10	0.662568	ENSG00000142347	MYO1F	1.87642	ENSG00000198899	MT-ATP6	1.68224	ENSG00000197728	RPS26
ENSG00000215845	TSTD1	0.54707	ENSG00000088986	DYNLL1	0.898786	ENSG00000142634	AC020656.64	0.81855	ENSG00000137876	RSL24D1	0.277488	ENSG00000100353	EIF3D	0.357053	ENSG00000075624	ACTB	0.342597	ENSG00000211592	IGKC	1.12063	ENSG00000136167	LCP1	0.46692	ENSG00000082074	FYB1	0.484197	ENSG00000198763	MT-ND2	0.651884	ENSG00000170525	PFKFB3	0.472607	ENSG00000145416	MARCHF1	0.641296	ENSG00000100647	SUSD6	1.042	ENSG00000177663	IL17RA	0.656842	ENSG00000166927	MS4A7	1.87642	ENSG00000100079	LGALS2	1.65229	ENSG00000170581	STAT2
ENSG00000138071	ACTR2	0.54707	ENSG00000163931	TKT	0.882064	ENSG00000180353	AC020656.65	0.817366	ENSG00000143549	TPM3	0.272726	ENSG00000134294	SLC38A2	0.350546	ENSG00000101109	STK4	0.323907	ENSG00000114315	HES1	1.1042	ENSG00000235162	C12orf75	0.465045	ENSG00000130066	SAT1	0.461438	ENSG00000197540	GZMM	0.648962	ENSG00000101596	SMCHD1	0.464511	ENSG00000120686	UFM1	0.639067	ENSG00000115415	STAT1	1.04014	ENSG00000170581	STAT2	0.648875	ENSG00000159110	IFNAR2	1.8578	ENSG00000180776	ZDHHC20	1.65229	ENSG00000152558	TMEM123
ENSG00000143110	C1orf162	0.541241	ENSG00000125347	IRF1	0.875561	ENSG00000123146	AC020656.66	0.802749	ENSG00000130066	SAT1	0.271407	ENSG00000172183	ISG20	0.346741	ENSG00000113558	SKP1	0.2839	ENSG00000171456	ASXL1	1.1012	ENSG00000115523	GNLY	0.458468	ENSG00000114353	GNAI2	0.455342	ENSG00000173915	ATP5MD	0.644497	ENSG00000125827	TMX4	0.462453	ENSG00000154518	ATP5MC3	0.634217	ENSG00000118482	PHF3	1.02819	ENSG00000169895	SYAP1	0.648606	ENSG00000090863	GLG1	1.8578	ENSG00000182196	ARL6IP4	1.65229	ENSG00000005302	MSL3
ENSG00000127528	KLF2	0.538089	ENSG00000188229	TUBB4B	0.861886	ENSG00000227191	AC020656.67	0.797883	ENSG00000112576	CCND3	0.265803	ENSG00000104904	OAZ1	0.343411	ENSG00000251562	MALAT1	0.271313	ENSG00000146007	ZMAT2	1.1012	ENSG00000129968	ABHD17A	0.453435	ENSG00000164111	ANXA5	0.454975	ENSG00000185201	IFITM2	0.637924	ENSG00000092841	MYL6	0.457764	ENSG00000184203	PPP1R2	0.632012	ENSG00000019169	MARCO	1.02819	ENSG00000113575	PPP2CA	0.646936	ENSG00000139668	WDFY2	1.8578	ENSG00000211450	SELENOH	1.65229	ENSG00000177556	ATOX1
ENSG00000185088	RPS27L	0.536263	ENSG00000162783	IER5	0.861886	ENSG00000137076	AC020656.68	0.790363	ENSG00000143119	CD53	0.265712	ENSG00000245532	NEAT1	0.342466	ENSG00000158710	TAGLN2	0.271148	ENSG00000197622	CDC42SE1	1.08035	ENSG00000075624	ACTB	0.452127	ENSG00000026297	RNASET2	0.453749	ENSG00000110852	CLEC2B	0.628464	ENSG00000135899	SP110	0.454306	ENSG00000132842	AP3B1	0.614454	ENSG00000085832	EPS15	1.02472	ENSG00000129968	ABHD17A	0.641245	ENSG00000166130	IKBIP	1.8578	ENSG00000059377	TBXAS1	1.65229	ENSG00000163902	RPN1
ENSG00000131171	SH3BGRL	0.531963	ENSG00000026025	VIM	0.856779	ENSG00000135441	AC020656.69	0.788229	ENSG00000197943	PLCG2	0.264251	ENSG00000127528	KLF2	0.342096	ENSG00000215301	DDX3X	0.246745	ENSG00000164096	C4orf3	1.07361	ENSG00000142634	EFHD2	0.450891	ENSG00000137575	SDCBP	0.451301	ENSG00000223865	HLA-DPB1	0.624118	ENSG00000171051	FPR1	0.444643	ENSG00000269893	SNHG8	0.613944	ENSG00000140526	ABHD2	1.02314	ENSG00000183172	SMDT1	0.635183	ENSG00000172725	CORO1B	1.8578	ENSG00000085514	PILRA	1.65229	ENSG00000197329	PELI1
ENSG00000117616	RSRP1	0.531963	ENSG00000141232	TOB1	0.842778	ENSG00000130592	AC020656.70	0.782505	ENSG00000179218	CALR	0.260915	ENSG00000143549	TPM3	0.332069	ENSG00000125347	IRF1	0.244702	ENSG00000116489	CAPZA1	1.06964	ENSG00000196924	FLNA	0.450695	ENSG00000107738	VSIR	0.444851	ENSG00000067560	RHOA	0.623277	ENSG00000126247	CAPNS1	0.443315	ENSG00000111275	ALDH2	0.611598	ENSG00000184743	ATL3	1.02314	ENSG00000132792	CTNNBL1	0.632257	ENSG00000214753	HNRNPUL2	1.8578	ENSG00000112149	CD83	1.65229	ENSG00000117151	CTBS
ENSG00000120742	SERP1	0.525537	ENSG00000168264	IRF2BP2	0.838803	ENSG00000196924	AC020656.71	0.77492	ENSG00000183648	NDUFB1	0.259312	ENSG00000150991	UBC	0.317878	ENSG00000128016	ZFP36	0.23938	ENSG00000172081	MOB3A	1.06272	ENSG00000148362	PAXX	0.449299	ENSG00000140575	IQGAP1	0.442964	ENSG00000198888	MT-ND1	0.616743	ENSG00000155463	OXA1L	0.439726	ENSG00000117425	PTCH2	0.609029	ENSG00000115523	GNLY	1.02052	ENSG00000149091	DGKZ	0.630496	ENSG00000169155	ZBTB43	1.8578	ENSG00000123636	BAZ2B	1.65229	ENSG00000113070	HBEGF
ENSG00000100138	SNU13	0.497317	ENSG00000038219	BOD1L1	0.837224	ENSG00000100097	AC020656.72	0.771888	ENSG00000173915	ATP5MD	0.258691	ENSG00000113811	SELENOK	0.317356	ENSG00000153187	HNRNPU	0.233799	ENSG00000141522	ARHGDIA	1.06272	ENSG00000130592	LSP1	0.446897	ENSG00000160255	ITGB2	0.442377	ENSG00000235162	C12orf75	0.612389	ENSG00000127481	UBR4	0.435932	ENSG00000103994	ZNF106	0.608891	ENSG00000086758	HUWE1	1.01892	ENSG00000163468	CCT3	0.625241	ENSG00000078674	PCM1	1.8578	ENSG00000143543	JTB	1.65229	ENSG00000112893	MAN2A1
ENSG00000197111	PCBP2	0.486875	ENSG00000086061	DNAJA1	0.81126	ENSG00000075624	AC020656.73	0.767208	ENSG00000147677	EIF3H	0.25775	ENSG00000162434	JAK1	0.314114	ENSG00000070756	PABPC1	0.221953	ENSG00000188229	TUBB4B	1.05431	ENSG00000183726	TMEM50A	0.445693	ENSG00000129226	CD68	0.441718	ENSG00000065518	NDUFB4	0.612389	ENSG00000221963	APOL6	0.43269	ENSG00000159216	RUNX1	0.606017	ENSG00000258289	CHURC1	1.01647	ENSG00000123338	NCKAP1L	0.620184	ENSG00000043462	LCP2	1.8578	ENSG00000081041	CXCL2	1.63026	ENSG00000163565	IFI16
ENSG00000100353	EIF3D	0.47307	ENSG00000124795	DEK	0.805743	ENSG00000197956	AC020656.74	0.754855	ENSG00000166848	TERF2IP	0.247424	ENSG00000152558	TMEM123	0.312744	ENSG00000100201	DDX17	0.206783	ENSG00000153147	SMARCA5	1.05431	ENSG00000147065	MSN	0.442395	ENSG00000143384	MCL1	0.441611	ENSG00000123416	TUBA1B	0.611124	ENSG00000172795	DCP2	0.431891	ENSG00000214046	SMIM7	0.604606	ENSG00000180817	PPA1	1.00516	ENSG00000090382	LYZ	0.618609	ENSG00000114302	PRKAR2A	1.8578	ENSG00000127540	UQCR11	1.6079	ENSG00000018280	SLC11A1
ENSG00000079246	XRCC5	0.47307	ENSG00000171791	BCL2	0.804984	ENSG00000185862	AC020656.75	0.753235	ENSG00000118640	VAMP8	0.247143	ENSG00000124831	LRRFIP1	0.312304	ENSG00000170345	FOS	0.205137	ENSG00000184588	PDE4B	1.05431	ENSG00000189067	LITAF	0.434671	ENSG00000087086	FTL	0.433924	ENSG00000179218	CALR	0.608177	ENSG00000112096	SOD2	0.431213	ENSG00000131724	IL13RA1	0.604194	ENSG00000148730	EIF4EBP2	1.00332	ENSG00000104903	LYL1	0.616231	ENSG00000131389	SLC6A6	1.8578	ENSG00000166523	CLEC4E	1.6079	ENSG00000172725	CORO1B
ENSG00000101347	SAMHD1	0.47307	ENSG00000168685	IL7R	0.801171	ENSG00000169230	AC020656.76	0.752684	ENSG00000175390	EIF3F	0.242793	ENSG00000167863	ATP5PD	0.311508	ENSG00000152601	MBNL1	0.200759	ENSG00000169508	GPR183	1.02772	ENSG00000223865	HLA-DPB1	0.43341	ENSG00000021355	SERPINB1	0.433255	ENSG00000067048	DDX3Y	0.606705	ENSG00000177556	ATOX1	0.430881	ENSG00000270629	NBPF14	0.601639	ENSG00000112893	MAN2A1	0.997606	ENSG00000166340	TPP1	0.614419	ENSG00000069424	KCNAB2	1.8578	ENSG00000138279	ANXA7	1.6079	ENSG00000172795	DCP2
ENSG00000129559	NEDD8	0.47307	ENSG00000118503	TNFAIP3	0.798999	ENSG00000198763	AC020656.77	0.75154	ENSG00000198727	MT-CYB	0.240269	ENSG00000129562	DAD1	0.311289	ENSG00000234745	HLA-B	0.16624	ENSG00000171681	ATF7IP	1.02525	ENSG00000196405	EVL	0.428673	ENSG00000104763	ASAH1	0.429405	ENSG00000067082	KLF6	0.60656	ENSG00000198763	MT-ND2	0.415231	ENSG00000133106	EPSTI1	0.601639	ENSG00000137462	TLR2	0.997606	ENSG00000205413	SAMD9	0.614109	ENSG00000020633	RUNX3	1.8578	ENSG00000073921	PICALM	1.6079	ENSG00000158481	CD1C
ENSG00000170315	UBB	0.47307	ENSG00000136238	RAC1	0.797035	ENSG00000136167	AC020656.78	0.748264	ENSG00000075624	ACTB	0.237612	ENSG00000160888	IER2	0.310637	ENSG00000092841	MYL6	0.161621	ENSG00000100221	JOSD1	1.02115	ENSG00000111775	COX6A1	0.428395	ENSG00000158869	FCER1G	0.429309	ENSG00000110934	BIN2	0.603654	ENSG00000059728	MXD1	0.414971	ENSG00000115977	AAK1	0.599932	ENSG00000075539	FRYL	0.993637	ENSG00000157514	TSC22D3	0.611223	ENSG00000245532	NEAT1	1.83223	ENSG00000002586	CD99	1.6079	ENSG00000214046	SMIM7
ENSG00000204642	HLA-F	0.47307	ENSG00000197448	GSTK1	0.793174	ENSG00000067082	AC020656.79	0.745416	ENSG00000131236	CAP1	0.235297	ENSG00000166136	NDUFB8	0.309761	ENSG00000276216	AC245014.3	0.153453	ENSG00000130511	SSBP4	1.02115	ENSG00000167004	PDIA3	0.42729	ENSG00000117091	CD48	0.423169	ENSG00000255823	MTRNR2L8	0.598396	ENSG00000152291	TGOLN2	0.413628	ENSG00000143337	TOR1AIP1	0.59846	ENSG00000151694	ADAM17	0.993637	ENSG00000138594	TMOD3	0.611223	ENSG00000149311	ATM	1.83133	ENSG00000197448	GSTK1	1.6079	ENSG00000103024	NME3
ENSG00000175390	EIF3F	0.461097	ENSG00000120129	DUSP1	0.790746	ENSG00000127824	AC020656.80	0.745416	ENSG00000130811	EIF3G	0.228108	ENSG00000117091	CD48	0.309464	ENSG00000101745	ANKRD12	0.148052	ENSG00000070831	CDC42	0.988724	ENSG00000198763	MT-ND2	0.424706	ENSG00000204472	AIF1	0.420542	ENSG00000136732	GYPC	0.596897	ENSG00000152332	UHMK1	0.410726	ENSG00000120690	ELF1	0.59137	ENSG00000136867	SLC31A2	0.99072	ENSG00000163527	STT3B	0.609537	ENSG00000184602	SNN	1.81341	ENSG00000112406	HECA	1.6079	ENSG00000106244	PDAP1
ENSG00000101608	MYL12A	0.458948	ENSG00000132002	DNAJB1	0.790679	ENSG00000162511	AC020656.81	0.741037	ENSG00000110651	CD81	0.227872	ENSG00000143774	GUK1	0.308482	ENSG00000166913	YWHAB	0.144175	ENSG00000198786	MT-ND5	0.957473	ENSG00000116824	CD2	0.422672	ENSG00000162511	LAPTM5	0.415072	ENSG00000166595	FAM96B	0.59353	ENSG00000117091	CD48	0.41065	ENSG00000111011	RSRC2	0.587813	ENSG00000111144	LTA4H	0.978154	ENSG00000168894	RNF181	0.597153	ENSG00000103024	NME3	1.81341	ENSG00000113070	HBEGF	1.58518	ENSG00000038427	VCAN
ENSG00000136758	YME1L1	0.452605	ENSG00000214253	FIS1	0.786598	ENSG00000189067	AC020656.82	0.730916	ENSG00000122034	GTF3A	0.227435	ENSG00000134825	TMEM258	0.303263	ENSG00000081237	PTPRC	0.139082	ENSG00000103811	CTSH	0.9531	ENSG00000204642	HLA-F	0.422149	ENSG00000136238	RAC1	0.414376	ENSG00000132963	POMP	0.59353	ENSG00000169021	UQCRFS1	0.406437	ENSG00000173457	PPP1R14B	0.587813	ENSG00000105401	CDC37	0.971611	ENSG00000214941	ZSWIM7	0.595731	ENSG00000120708	TGFBI	1.81341	ENSG00000196419	XRCC6	1.56209	ENSG00000138434	SSFA2
ENSG00000198763	MT-ND2	0.447074	ENSG00000115310	RTN4	0.777822	ENSG00000143119	AC020656.83	0.725048	ENSG00000105887	MTPN	0.226715	ENSG00000197943	PLCG2	0.303242	ENSG00000134884	ARGLU1	0.12308	ENSG00000164031	DNAJB14	0.9531	ENSG00000118640	VAMP8	0.419012	ENSG00000269893	SNHG8	0.408179	ENSG00000047410	TPR	0.580893	ENSG00000187608	ISG15	0.404373	ENSG00000009307	CSDE1	0.586763	ENSG00000137815	RTF1	0.971611	ENSG00000072786	STK10	0.593021	ENSG00000172243	CLEC7A	1.79069	ENSG00000170906	NDUFA3	1.56209	ENSG00000099341	PSMD8
ENSG00000171791	BCL2	0.447074	ENSG00000076641	PAG1	0.776997	ENSG00000163191	AC020656.84	0.712131	ENSG00000185201	IFITM2	0.225172	ENSG00000110321	EIF4G2	0.303026	ENSG00000177410	ZFAS1	0.118688	ENSG00000196396	PTPN1	0.937194	ENSG00000163466	ARPC2	0.416347	ENSG00000204482	LST1	0.406932	ENSG00000141293	SKAP1	0.57903	ENSG00000198840	MT-ND3	0.402756	ENSG00000163512	AZI2	0.585296	ENSG00000110931	CAMKK2	0.971611	ENSG00000246705	H2AFJ	0.592463	ENSG00000143384	MCL1	1.79069	ENSG00000100811	YY1	1.56209	ENSG00000059377	TBXAS1
ENSG00000100387	RBX1	0.4445	ENSG00000241553	ARPC4	0.776997	ENSG00000169564	AC020656.85	0.703768	ENSG00000143543	JTB	0.224544	ENSG00000159388	BTG2	0.302544	ENSG00000087086	FTL	0.086588	ENSG00000175567	UCP2	0.935613	ENSG00000099624	ATP5F1D	0.41268	ENSG00000091317	CMTM6	0.405545	ENSG00000164548	TRA2A	0.559922	ENSG00000166927	MS4A7	0.40099	ENSG00000197448	GSTK1	0.583991	ENSG00000106948	AKNA	0.971611	ENSG00000099875	MKNK2	0.589435	ENSG00000163171	CDC42EP3	1.77688	ENSG00000169413	RNASE6	1.56209	ENSG00000179218	CALR
ENSG00000086061	DNAJA1	0.435102	ENSG00000255302	EID1	0.773659	ENSG00000143384	AC020656.86	0.698495	ENSG00000166794	PPIB	0.222971	ENSG00000177700	POLR2L	0.302388	ENSG00000198502	HLA-DRB5	0.0632555	ENSG00000104131	EIF3J	0.925988	ENSG00000130066	SAT1	0.411712	ENSG00000092841	MYL6	0.398883	ENSG00000120727	PAIP2	0.548169	ENSG00000171314	PGAM1	0.400799	ENSG00000069275	NUCKS1	0.580126	ENSG00000188994	ZNF292	0.971611	ENSG00000163565	IFI16	0.588989	ENSG00000100422	CERK	1.7203	ENSG00000165669	FAM204A	1.56209	ENSG00000090104	RGS1
ENSG00000150991	UBC	0.429713	ENSG00000107581	EIF3A	0.773448	ENSG00000101347	AC020656.87	0.676153	ENSG00000196126	HLA-DRB1	0.216354	ENSG00000255302	EID1	0.300593	ENSG00000162511	LAPTM5	0.0615532	ENSG00000105669	COPE	0.923629	ENSG00000131236	CAP1	0.391531	ENSG00000111640	GAPDH	0.396604	ENSG00000165527	ARF6	0.547726	ENSG00000166523	CLEC4E	0.399866	ENSG00000164125	FAM198B	0.574653	ENSG00000170776	AKAP13	0.960251	ENSG00000122692	SMU1	0.585832	ENSG00000104824	HNRNPL	1.7203	ENSG00000198624	CCDC69	1.56209	ENSG00000165669	FAM204A
ENSG00000130811	EIF3G	0.419958	ENSG00000158710	TAGLN2	0.761484	ENSG00000114978	AC020656.88	0.675875	ENSG00000111775	COX6A1	0.215899	ENSG00000158050	DUSP2	0.298441	ENSG00000204592	HLA-E	0.0551537	ENSG00000079246	XRCC5	0.918335	ENSG00000169442	CD52	0.389238	ENSG00000163220	S100A9	0.390272	ENSG00000115935	WIPF1	0.540512	ENSG00000120594	PLXDC2	0.394378	ENSG00000172270	BSG	0.572262	ENSG00000213145	CRIP1	0.951712	ENSG00000105402	NAPA	0.584809	ENSG00000104915	STX10	1.7203	ENSG00000130255	RPL36	1.54806	ENSG00000263001	GTF2I
ENSG00000100632	ERH	0.416486	ENSG00000111276	CDKN1B	0.755687	ENSG00000005022	AC020656.89	0.673625	ENSG00000277734	TRAC	0.21516	ENSG00000166710	B2M	0.296961	ENSG00000160888	IER2	0.049435	ENSG00000197043	ANXA6	0.895614	ENSG00000128340	RAC2	0.387221	ENSG00000173221	GLRX	0.381065	ENSG00000081320	STK17B	0.535113	ENSG00000151726	ACSL1	0.393905	ENSG00000173141	MRPL57	0.570612	ENSG00000071553	ATP6AP1	0.950853	ENSG00000170296	GABARAP	0.583064	ENSG00000132824	SERINC3	1.7203	ENSG00000198763	MT-ND2	1.54078	ENSG00000092203	TOX4
ENSG00000102760	RGCC	0.416486	ENSG00000055044	NOP58	0.755687	ENSG00000100300	AC020656.90	0.668794	ENSG00000184009	ACTG1	0.213208	ENSG00000156411	ATP5MPL	0.288771	ENSG00000184009	ACTG1	0.0315466	ENSG00000164985	PSIP1	0.884387	ENSG00000231389	HLA-DPA1	0.386022	ENSG00000100300	TSPO	0.375813	ENSG00000153234	NR4A2	0.525715	ENSG00000084463	WBP11	0.389572	ENSG00000137409	MTCH1	0.56865	ENSG00000147416	ATP6V1B2	0.928218	ENSG00000178209	PLEC	0.582352	ENSG00000189159	JPT1	1.7203	ENSG00000130429	ARPC1B	1.53863	ENSG00000146247	PHIP
ENSG00000168066	SF1	0.416486	ENSG00000170571	EMB	0.73903	ENSG00000140941	AC020656.91	0.652306	ENSG00000127824	TUBA4A	0.210765	ENSG00000163479	SSR2	0.287197	ENSG00000119801	YPEL5	0.0148924	ENSG00000131174	COX7B	0.880664	ENSG00000109861	CTSC	0.385271	ENSG00000197766	CFD	0.371754	ENSG00000008018	PSMB1	0.522447	ENSG00000092964	DPYSL2	0.387445	ENSG00000162711	NLRP3	0.565375	ENSG00000171051	FPR1	0.923606	ENSG00000196576	PLXNB2	0.577115	ENSG00000168591	TMUB2	1.7203	ENSG00000269028	MTRNR2L12	1.53525	ENSG00000145354	CISD2
ENSG00000176731	C8orf59	0.412528	ENSG00000147548	NSD3	0.738504	ENSG00000124831	AC020656.92	0.646283	ENSG00000092841	MYL6	0.210105	ENSG00000089220	PEBP1	0.286664	ENSG00000122566	HNRNPA2B1	0.0122526	ENSG00000160948	VPS28	0.865867	ENSG00000166794	PPIB	0.383469	ENSG00000144746	ARL6IP5	0.369796	ENSG00000092841	MYL6	0.519877	ENSG00000156587	UBE2L6	0.387192	ENSG00000125810	CD93	0.562173	ENSG00000113441	LNPEP	0.918172	ENSG00000171051	FPR1	0.575411	ENSG00000007202	KIAA0100	1.7203	ENSG00000245532	NEAT1	1.51697	ENSG00000109323	MANBA
ENSG00000126267	COX6B1	0.410334	ENSG00000137642	SORL1	0.733153	ENSG00000077984	AC020656.93	0.64588	ENSG00000069275	NUCKS1	0.208612	ENSG00000111640	GAPDH	0.285576	ENSG00000108654	DDX5	0.00663042	ENSG00000115419	GLS	0.865867	ENSG00000077984	CST7	0.380755	ENSG00000028137	TNFRSF1B	0.36781	ENSG00000105993	DNAJB6	0.516909	ENSG00000198888	MT-ND1	0.386141	ENSG00000137815	RTF1	0.558803	ENSG00000111275	ALDH2	0.914386	ENSG00000136448	NMT1	0.568345	ENSG00000167703	SLC43A2	1.7203	ENSG00000155465	SLC7A7	1.51479	ENSG00000072274	TFRC
ENSG00000196199	MPHOSPH8	0.407974	ENSG00000267100	ILF3-DT	0.709883	ENSG00000138071	AC020656.94	0.639287	ENSG00000002586	CD99	0.207922	ENSG00000185885	IFITM1	0.281917	ENSG00000120742	SERP1	0.00643733	ENSG00000164405	UQCRQ	0.85122	ENSG00000123416	TUBA1B	0.377432	ENSG00000163191	S100A11	0.362761	ENSG00000204264	PSMB8	0.516909	ENSG00000112406	HECA	0.385914	ENSG00000123684	LPGAT1	0.556605	ENSG00000160932	LY6E	0.909245	ENSG00000152291	TGOLN2	0.56591	ENSG00000005339	CREBBP	1.7203	ENSG00000205352	PRR13	1.51479	ENSG00000161921	CXCL16
ENSG00000120690	ELF1	0.40268	ENSG00000101745	ANKRD12	0.705161	ENSG00000135404	AC020656.95	0.638501	ENSG00000171858	RPS21	0.207586	ENSG00000185088	RPS27L	0.281416	ENSG00000120129	DUSP1	0.00372214	ENSG00000217555	CKLF	0.85122	ENSG00000198786	MT-ND5	0.377393	ENSG00000198727	MT-CYB	0.362739	ENSG00000168298	HIST1H1E	0.515305	ENSG00000116679	IVNS1ABP	0.384497	ENSG00000175602	CCDC85B	0.555679	ENSG00000164125	FAM198B	0.908417	ENSG00000123505	AMD1	0.563669	ENSG00000166411	IDH3A	1.7203	ENSG00000107551	RASSF4	1.51479	ENSG00000100422	CERK
ENSG00000198888	MT-ND1	0.39891	ENSG00000003402	CFLAR	0.696827	ENSG00000107372	AC020656.96	0.637163	ENSG00000173821	RNF213	0.205046	ENSG00000234745	HLA-B	0.279284				ENSG00000228253	MT-ATP8	0.841167	ENSG00000154518	ATP5MC3	0.374897	ENSG00000182287	AP1S2	0.356516	ENSG00000158710	TAGLN2	0.512393	ENSG00000171159	C9orf16	0.383734	ENSG00000177663	IL17RA	0.551181	ENSG00000145649	GZMA	0.906023	ENSG00000149781	FERMT3	0.562788	ENSG00000165650	PDZD8	1.7203	ENSG00000113648	H2AFY	1.49867	ENSG00000196961	AP2A1
ENSG00000198168	SVIP	0.392899	ENSG00000185650	ZFP36L1	0.685009	ENSG00000172543	AC020656.97	0.63377	ENSG00000111348	ARHGDIB	0.203912	ENSG00000131174	COX7B	0.276352				ENSG00000132465	JCHAIN	0.836721	ENSG00000188042	ARL4C	0.36264	ENSG00000213145	CRIP1	0.356231	ENSG00000133398	MED10	0.505474	ENSG00000177663	IL17RA	0.38118	ENSG00000168610	STAT3	0.54955	ENSG00000100567	PSMA3	0.90207	ENSG00000130775	THEMIS2	0.562716	ENSG00000148290	SURF1	1.7203	ENSG00000105640	RPL18A	1.48748	ENSG00000008294	SPAG9
ENSG00000171223	JUNB	0.389005	ENSG00000183291	SELENOF	0.674259	ENSG00000124942	AC020656.98	0.632407	ENSG00000160310	PRMT2	0.201145	ENSG00000143543	JTB	0.274353				ENSG00000186010	NDUFA13	0.818799	ENSG00000074800	ENO1	0.35901	ENSG00000172216	CEBPB	0.355705	ENSG00000118680	MYL12B	0.503498	ENSG00000169896	ITGAM	0.380342	ENSG00000185650	ZFP36L1	0.539494	ENSG00000130731	METTL26	0.89761	ENSG00000077380	DYNC1I2	0.56147	ENSG00000146247	PHIP	1.7203	ENSG00000126267	COX6B1	1.48237	ENSG00000137364	TPMT
ENSG00000169567	HINT1	0.384978	ENSG00000100354	TNRC6B	0.671915	ENSG00000185201	AC020656.99	0.631511	ENSG00000077549	CAPZB	0.199992	ENSG00000169567	HINT1	0.272732				ENSG00000104763	ASAH1	0.818799	ENSG00000185088	RPS27L	0.357965	ENSG00000170776	AKAP13	0.355243	ENSG00000125870	SNRPB2	0.502765	ENSG00000171862	PTEN	0.378718	ENSG00000171298	GAA	0.538903	ENSG00000006459	KDM7A	0.89761	ENSG00000117862	TXNDC12	0.558256	ENSG00000096060	FKBP5	1.7203	ENSG00000101084	RAB5IF	1.46588	ENSG00000185022	MAFF
ENSG00000240972	MIF	0.37996	ENSG00000177606	JUN	0.669132	ENSG00000145833	AC020656.100	0.6244	ENSG00000185885	IFITM1	0.198217	ENSG00000227507	LTB	0.272024				ENSG00000089327	FXYD5	0.808152	ENSG00000172757	CFL1	0.354588	ENSG00000153113	CAST	0.354261	ENSG00000171530	TBCA	0.501166	ENSG00000146729	NIPSNAP2	0.376747	ENSG00000154589	LY96	0.538903	ENSG00000172845	SP3	0.89761	ENSG00000185201	IFITM2	0.558119	ENSG00000145901	TNIP1	1.7203	ENSG00000134758	RNF138	1.46588	ENSG00000171298	GAA
ENSG00000116560	SFPQ	0.37996	ENSG00000196924	FLNA	0.667876	ENSG00000165119	AC020656.101	0.613201	ENSG00000172543	CTSW	0.19695	ENSG00000182774	RPS17	0.27187				ENSG00000150093	ITGB1	0.808152	ENSG00000135404	CD63	0.354218	ENSG00000197249	SERPINA1	0.352962	ENSG00000181222	POLR2A	0.500421	ENSG00000103994	ZNF106	0.376144	ENSG00000151726	ACSL1	0.538903	ENSG00000243147	MRPL33	0.89761	ENSG00000100596	SPTLC2	0.557448	ENSG00000164104	HMGB2	1.7203	ENSG00000108669	CYTH1	1.46588	ENSG00000185262	UBALD2
ENSG00000164104	HMGB2	0.371786	ENSG00000084070	SMAP2	0.66687	ENSG00000147065	AC020656.102	0.612477	ENSG00000174718	KIAA1551	0.195155	ENSG00000089327	FXYD5	0.268801				ENSG00000132485	ZRANB2	0.79969	ENSG00000184009	ACTG1	0.344615	ENSG00000117410	ATP6V0B	0.341911	ENSG00000148362	PAXX	0.497443	ENSG00000152518	ZFP36L2	0.372808	ENSG00000135316	SYNCRIP	0.538903	ENSG00000132274	TRIM22	0.894305	ENSG00000130706	ADRM1	0.556795	ENSG00000168769	TET2	1.7203	ENSG00000185262	UBALD2	1.46588	ENSG00000187164	SHTN1
ENSG00000213654	GPSM3	0.371786	ENSG00000010244	ZNF207	0.658353	ENSG00000185650	AC020656.103	0.599565	ENSG00000065518	NDUFB4	0.192829	ENSG00000051523	CYBA	0.267464				ENSG00000162511	LAPTM5	0.796079	ENSG00000144746	ARL6IP5	0.344501	ENSG00000167470	MIDN	0.341555	ENSG00000013441	CLK1	0.497443	ENSG00000067334	DNTTIP2	0.371592	ENSG00000187164	SHTN1	0.536184	ENSG00000083223	TUT7	0.884148	ENSG00000100442	FKBP3	0.550643	ENSG00000151247	EIF4E	1.7203	ENSG00000275302	CCL4	1.46588	ENSG00000168010	ATG16L2
ENSG00000177606	JUN	0.368733	ENSG00000138767	CNOT6L	0.658353	ENSG00000162704	AC020656.104	0.597093	ENSG00000118181	RPS25	0.19129	ENSG00000171223	JUNB	0.260269				ENSG00000157106	SMG1	0.792804	ENSG00000163564	PYHIN1	0.341112	ENSG00000160213	CSTB	0.341136	ENSG00000197956	S100A6	0.496568	ENSG00000044115	CTNNA1	0.370609	ENSG00000086300	SNX10	0.529661	ENSG00000160310	PRMT2	0.878502	ENSG00000086062	B4GALT1	0.550643	ENSG00000118564	FBXL5	1.7203	ENSG00000072110	ACTN1	1.46588	ENSG00000123728	RAP2C
ENSG00000119801	YPEL5	0.366154	ENSG00000205352	PRR13	0.653778	ENSG00000204525	AC020656.105	0.594175	ENSG00000198840	MT-ND3	0.18709	ENSG00000080824	HSP90AA1	0.257493				ENSG00000117450	PRDX1	0.78709	ENSG00000137076	TLN1	0.340985	ENSG00000101182	PSMA7	0.341078	ENSG00000009790	TRAF3IP3	0.494231	ENSG00000213203	GIMAP1	0.369077	ENSG00000242574	HLA-DMB	0.5296	ENSG00000138085	ATRAID	0.877489	ENSG00000232119	MCTS1	0.550643	ENSG00000173193	PARP14	1.7203	ENSG00000035403	VCL	1.46588	ENSG00000163683	SMIM14
ENSG00000092010	PSME1	0.36501	ENSG00000044574	HSPA5	0.645075	ENSG00000084070	AC020656.106	0.588446	ENSG00000212907	MT-ND4L	0.18672	ENSG00000100129	EIF3L	0.256486				ENSG00000136003	ISCU	0.771493	ENSG00000110651	CD81	0.34047	ENSG00000107372	ZFAND5	0.338788	ENSG00000113088	GZMK	0.491945	ENSG00000090863	GLG1	0.364612	ENSG00000180817	PPA1	0.527126	ENSG00000155463	OXA1L	0.872075	ENSG00000163931	TKT	0.549323	ENSG00000138095	LRPPRC	1.7203	ENSG00000197622	CDC42SE1	1.46588	ENSG00000114302	PRKAR2A
ENSG00000169020	ATP5ME	0.36501	ENSG00000167996	FTH1	0.641845	ENSG00000182718	AC020656.107	0.586718	ENSG00000123416	TUBA1B	0.186268	ENSG00000111775	COX6A1	0.247275				ENSG00000163683	SMIM14	0.770084	ENSG00000100911	PSME2	0.336068	ENSG00000103490	PYCARD	0.331169	ENSG00000198840	MT-ND3	0.48879	ENSG00000071054	MAP4K4	0.363576	ENSG00000197329	PELI1	0.526519	ENSG00000023445	BIRC3	0.872075	ENSG00000105323	HNRNPUL1	0.544855	ENSG00000134371	CDC73	1.7203	ENSG00000116171	SCP2	1.46588	ENSG00000075292	ZNF638
ENSG00000129128	SPCS3	0.362038	ENSG00000007944	MYLIP	0.639494	ENSG00000198888	AC020656.108	0.58651	ENSG00000136810	TXN	0.184689	ENSG00000172757	CFL1	0.244285				ENSG00000205302	SNX2	0.760455	ENSG00000173821	RNF213	0.330966	ENSG00000081320	STK17B	0.329957	ENSG00000054654	SYNE2	0.486615	ENSG00000169403	PTAFR	0.36238	ENSG00000101596	SMCHD1	0.525947	ENSG00000173559	NABP1	0.86058	ENSG00000177575	CD163	0.543168	ENSG00000085832	EPS15	1.7203	ENSG00000172809	RPL38	1.46034	ENSG00000141232	TOB1
ENSG00000269893	SNHG8	0.360369	ENSG00000075884	ARHGAP15	0.639494	ENSG00000110321	AC020656.109	0.58462	ENSG00000213654	GPSM3	0.184515	ENSG00000111229	ARPC3	0.242741				ENSG00000177156	TALDO1	0.756063	ENSG00000241468	ATP5MF	0.330525	ENSG00000100387	RBX1	0.324372	ENSG00000128534	LSM8	0.485277	ENSG00000143878	RHOB	0.361819	ENSG00000090382	LYZ	0.523888	ENSG00000260916	CCPG1	0.859136	ENSG00000078674	PCM1	0.538015	ENSG00000117676	RPS6KA1	1.7203	ENSG00000089327	FXYD5	1.44079	ENSG00000155096	AZIN1
ENSG00000133574	GIMAP4	0.357592	ENSG00000184897	H1FX	0.639494	ENSG00000175567	AC020656.110	0.573052	ENSG00000130755	GMFG	0.18063	ENSG00000169020	ATP5ME	0.23951				ENSG00000198843	SELENOT	0.756063	ENSG00000131174	COX7B	0.330295	ENSG00000100911	PSME2	0.323129	ENSG00000125971	DYNLRB1	0.484119	ENSG00000168961	LGALS9	0.359551	ENSG00000111144	LTA4H	0.522783	ENSG00000140968	IRF8	0.856134	ENSG00000099337	KCNK6	0.527967	ENSG00000203747	FCGR3A	1.68489	ENSG00000157514	TSC22D3	1.44079	ENSG00000157191	NECAP2
ENSG00000220205	VAMP2	0.350213	ENSG00000100906	NFKBIA	0.638033	ENSG00000160213	AC020656.111	0.571697	ENSG00000127540	UQCR11	0.180171	ENSG00000240065	PSMB9	0.238051				ENSG00000113732	ATP6V0E1	0.751225	ENSG00000111640	GAPDH	0.330276	ENSG00000162704	ARPC5	0.322204	ENSG00000130066	SAT1	0.483106	ENSG00000115828	QPCT	0.359541	ENSG00000118855	MFSD1	0.52039	ENSG00000092201	SUPT16H	0.856134	ENSG00000122218	COPA	0.527967	ENSG00000141298	SSH2	1.6463	ENSG00000265972	TXNIP	1.42808	ENSG00000179639	FCER1A
ENSG00000135046	ANXA1	0.344336	ENSG00000136167	LCP1	0.635883	ENSG00000067560	AC020656.112	0.571386	ENSG00000080824	HSP90AA1	0.179547	ENSG00000116288	PARK7	0.2368				ENSG00000117410	ATP6V0B	0.749937	ENSG00000090266	NDUFB2	0.326019	ENSG00000198840	MT-ND3	0.321735	ENSG00000136810	TXN	0.482646	ENSG00000005810	MYCBP2	0.358405	ENSG00000198763	MT-ND2	0.51569	ENSG00000132824	SERINC3	0.854797	ENSG00000139163	ETNK1	0.524309	ENSG00000138061	CYP1B1	1.6463	ENSG00000100316	RPL3	1.42459	ENSG00000119900	OGFRL1
ENSG00000125740	FOSB	0.335566	ENSG00000143110	C1orf162	0.631589	ENSG00000204397	AC020656.113	0.566446	ENSG00000153563	CD8A	0.17808	ENSG00000132475	H3F3B	0.23677				ENSG00000198258	UBL5	0.746751	ENSG00000116209	TMEM59	0.325014	ENSG00000182774	RPS17	0.320569	ENSG00000188229	TUBB4B	0.480072	ENSG00000062716	VMP1	0.358107	ENSG00000173744	AGFG1	0.514829	ENSG00000162654	GBP4	0.854797	ENSG00000184863	RBM33	0.524309	ENSG00000198771	RCSD1	1.6463	ENSG00000113387	SUB1	1.41525	ENSG00000100596	SPTLC2
ENSG00000104894	CD37	0.322929	ENSG00000115419	GLS	0.631273	ENSG00000140612	AC020656.114	0.563809	ENSG00000102317	RBM3	0.177462	ENSG00000101608	MYL12A	0.235611				ENSG00000156738	MS4A1	0.740796	ENSG00000166710	B2M	0.324137	ENSG00000127528	KLF2	0.316432	ENSG00000143933	CALM2	0.477277	ENSG00000101782	RIOK3	0.357758	ENSG00000173575	CHD2	0.514408	ENSG00000071127	WDR1	0.851317	ENSG00000170275	CRTAP	0.522667	ENSG00000125910	S1PR4	1.62076	ENSG00000162244	RPL29	1.41157	ENSG00000198763	MT-ND2
ENSG00000111229	ARPC3	0.319913	ENSG00000165732	DDX21	0.625819	ENSG00000013441	AC020656.115	0.561704	ENSG00000129968	ABHD17A	0.177166	ENSG00000142541	RPL13A	0.235533				ENSG00000130332	LSM7	0.73911	ENSG00000126267	COX6B1	0.323966	ENSG00000154518	ATP5MC3	0.311897	ENSG00000204525	HLA-C	0.472543	ENSG00000164125	FAM198B	0.355496	ENSG00000176731	C8orf59	0.513368	ENSG00000100368	CSF2RB	0.84608	ENSG00000168769	TET2	0.521533	ENSG00000080371	RAB21	1.62076	ENSG00000188846	RPL14	1.4088	ENSG00000127022	CANX
ENSG00000121966	CXCR4	0.319264	ENSG00000135535	CD164	0.620878	ENSG00000154518	AC020656.116	0.559404	ENSG00000114353	GNAI2	0.176895	ENSG00000185201	IFITM2	0.234317				ENSG00000134046	MBD2	0.725689	ENSG00000174021	GNG5	0.322339	ENSG00000138071	ACTR2	0.310725	ENSG00000157514	TSC22D3	0.471675	ENSG00000090382	LYZ	0.35515	ENSG00000084093	REST	0.512814	ENSG00000265808	SEC22B	0.84608	ENSG00000105755	ETHE1	0.521199	ENSG00000149212	SESN3	1.62076	ENSG00000213719	CLIC1	1.39797	ENSG00000127528	KLF2
ENSG00000135968	GCC2	0.319264	ENSG00000021355	SERPINB1	0.620878	ENSG00000170776	AC020656.117	0.558538	ENSG00000183726	TMEM50A	0.175624	ENSG00000168685	IL7R	0.233975				ENSG00000175354	PTPN2	0.725689	ENSG00000213719	CLIC1	0.320626	ENSG00000140379	BCL2A1	0.310082	ENSG00000051523	CYBA	0.467999	ENSG00000158710	TAGLN2	0.351631	ENSG00000231389	HLA-DPA1	0.512451	ENSG00000070495	JMJD6	0.842328	ENSG00000265972	TXNIP	0.516634	ENSG00000110057	UNC93B1	1.62076	ENSG00000076662	ICAM3	1.38926	ENSG00000197102	DYNC1H1
ENSG00000166136	NDUFB8	0.313871	ENSG00000049618	ARID1B	0.605547	ENSG00000026297	AC020656.118	0.557789	ENSG00000143384	MCL1	0.174457	ENSG00000112576	CCND3	0.227131				ENSG00000053254	FOXN3	0.725689	ENSG00000092841	MYL6	0.313116	ENSG00000185862	EVI2B	0.309591	ENSG00000166337	TAF10	0.467999	ENSG00000214253	FIS1	0.351183	ENSG00000198888	MT-ND1	0.510436	ENSG00000150593	PDCD4	0.842328	ENSG00000115484	CCT4	0.512821	ENSG00000082996	RNF13	1.62076	ENSG00000086061	DNAJA1	1.38926	ENSG00000179388	EGR3
ENSG00000168028	RPSA	0.310304	ENSG00000111640	GAPDH	0.60517	ENSG00000092841	AC020656.119	0.552391	ENSG00000146278	PNRC1	0.173784	ENSG00000143933	CALM2	0.226529				ENSG00000164032	H2AFZ	0.708616	ENSG00000070831	CDC42	0.312313	ENSG00000084207	GSTP1	0.307642	ENSG00000141682	PMAIP1	0.467999	ENSG00000131389	SLC6A6	0.350425	ENSG00000113163	COL4A3BP	0.509841	ENSG00000118705	RPN2	0.840367	ENSG00000126934	MAP2K2	0.510001	ENSG00000144711	IQSEC1	1.62076	ENSG00000118640	VAMP8	1.38926	ENSG00000145416	2021-03-01
ENSG00000029363	BCLAF1	0.309571	ENSG00000100300	TSPO	0.598852	ENSG00000143549	AC020656.120	0.548453	ENSG00000172531	PPP1CA	0.17126	ENSG00000126524	SBDS	0.224513				ENSG00000186063	AIDA	0.699217	ENSG00000152818	UTRN	0.311685	ENSG00000084070	SMAP2	0.307541	ENSG00000235576	LINC01871	0.467999	ENSG00000205544	TMEM256	0.349609	ENSG00000132274	TRIM22	0.509156	ENSG00000228253	MT-ATP8	0.83731	ENSG00000044115	CTNNA1	0.510001	ENSG00000054267	ARID4B	1.62076	ENSG00000163191	S100A11	1.38208	ENSG00000011304	PTBP1
ENSG00000115165	CYTIP	0.303145	ENSG00000160932	LY6E	0.595371	ENSG00000196154	AC020656.121	0.539086	ENSG00000164483	SAMD3	0.169877	ENSG00000075624	ACTB	0.224281				ENSG00000130592	LSP1	0.686161	ENSG00000127314	RAP1B	0.309874	ENSG00000162191	UBXN1	0.306959	ENSG00000034510	TMSB10	0.467999	ENSG00000147416	ATP6V1B2	0.348356	ENSG00000146425	DYNLT1	0.508529	ENSG00000083168	KAT6A	0.831886	ENSG00000124588	NQO2	0.510001	ENSG00000152332	UHMK1	1.62076	ENSG00000178982	EIF3K	1.38049	ENSG00000141574	SECTM1
ENSG00000112081	SRSF3	0.299302	ENSG00000118058	KMT2A	0.590859	ENSG00000078596	AC020656.122	0.536469	ENSG00000008988	RPS20	0.167009	ENSG00000171858	RPS21	0.221954				ENSG00000164919	COX6C	0.680175	ENSG00000198727	MT-CYB	0.309652	ENSG00000070756	PABPC1	0.304305	ENSG00000169976	SF3B5	0.456026	ENSG00000123684	LPGAT1	0.347556	ENSG00000137767	SQOR	0.508253	ENSG00000068878	PSME4	0.831886	ENSG00000104164	BLOC1S6	0.510001	ENSG00000155465	SLC7A7	1.59101	ENSG00000231500	RPS18	1.37131	ENSG00000181274	FRAT2
ENSG00000096746	HNRNPH3	0.285984	ENSG00000114353	GNAI2	0.590213	ENSG00000123416	AC020656.123	0.535198	ENSG00000082074	FYB1	0.166762	ENSG00000205542	TMSB4X	0.21654				ENSG00000177733	HNRNPA0	0.678384	ENSG00000169020	ATP5ME	0.309212	ENSG00000144802	NFKBIZ	0.303067	ENSG00000184752	NDUFA12	0.452058	ENSG00000130414	NDUFA10	0.347021	ENSG00000126709	IFI6	0.506482	ENSG00000197043	ANXA6	0.830255	ENSG00000168209	DDIT4	0.508324	ENSG00000142512	SIGLEC10	1.56829	ENSG00000048740	CELF2	1.36278	ENSG00000180628	PCGF5
ENSG00000204387	C6orf48	0.285137	ENSG00000180817	PPA1	0.581778	ENSG00000051523	AC020656.124	0.513782	ENSG00000147168	IL2RG	0.164835	ENSG00000169714	CNBP	0.216493				ENSG00000125870	SNRPB2	0.673222	ENSG00000114353	GNAI2	0.308989	ENSG00000169554	ZEB2	0.297511	ENSG00000171476	HOPX	0.450926	ENSG00000039319	ZFYVE16	0.345928	ENSG00000116679	IVNS1ABP	0.50544	ENSG00000175166	PSMD2	0.830255	ENSG00000149923	PPP4C	0.506921	ENSG00000186350	RXRA	1.56829	ENSG00000204103	MAFB	1.35206	ENSG00000133318	RTN3
ENSG00000197061	HIST1H4C	0.285137	ENSG00000168421	RHOH	0.581778	ENSG00000173821	AC020656.125	0.509443	ENSG00000128340	RAC2	0.164369	ENSG00000116824	CD2	0.211982				ENSG00000196072	BLOC1S2	0.673222	ENSG00000132963	POMP	0.308244	ENSG00000124942	AHNAK	0.295357	ENSG00000134954	ETS1	0.447535	ENSG00000164615	CAMLG	0.34402	ENSG00000168175	MAPK1IP1L	0.502245	ENSG00000120265	PCMT1	0.82802	ENSG00000003756	RBM5	0.505609	ENSG00000173559	NABP1	1.56829	ENSG00000204628	RACK1	1.34486	ENSG00000119397	CNTRL
ENSG00000170906	NDUFA3	0.284036	ENSG00000197747	S100A10	0.578952	ENSG00000134996	AC020656.126	0.506477	ENSG00000155368	DBI	0.16423	ENSG00000101182	PSMA7	0.211005				ENSG00000115935	WIPF1	0.673222	ENSG00000183648	NDUFB1	0.308218	ENSG00000179218	CALR	0.291984	ENSG00000118640	VAMP8	0.439985	ENSG00000141522	ARHGDIA	0.343713	ENSG00000078674	PCM1	0.502245	ENSG00000177575	CD163	0.826006	ENSG00000148730	EIF4EBP2	0.503337	ENSG00000048740	CELF2	1.55037	ENSG00000138326	RPS24	1.34357	ENSG00000114450	GNB4
ENSG00000116288	PARK7	0.284036	ENSG00000143384	MCL1	0.574497	ENSG00000143933	AC020656.127	0.49906	ENSG00000117614	SYF2	0.161849	ENSG00000198668	CALM1	0.210635				ENSG00000142227	EMP3	0.668356	ENSG00000271503	CCL5	0.307983	ENSG00000158710	TAGLN2	0.286496	ENSG00000178980	SELENOW	0.439144	ENSG00000118855	MFSD1	0.338977	ENSG00000170776	AKAP13	0.501872	ENSG00000114450	GNB4	0.819608	ENSG00000197102	DYNC1H1	0.502708	ENSG00000213145	CRIP1	1.53587	ENSG00000187514	PTMA	1.33922	ENSG00000134313	KIDINS220
ENSG00000265972	TXNIP	0.281928	ENSG00000152518	ZFP36L2	0.566321	ENSG00000102144	AC020656.128	0.498776	ENSG00000115738	ID2	0.15922	ENSG00000102317	RBM3	0.210577				ENSG00000106803	SEC61B	0.662954	ENSG00000105993	DNAJB6	0.3058	ENSG00000159674	SPON2	0.283074	ENSG00000074800	ENO1	0.439144	ENSG00000105402	NAPA	0.338894	ENSG00000167460	TPM4	0.496871	ENSG00000143878	RHOB	0.816793	ENSG00000013374	NUB1	0.502347	ENSG00000120008	WDR11	1.51385	ENSG00000140988	RPS2	1.33438	ENSG00000154305	MIA3
ENSG00000198755	RPL10A	0.280971	ENSG00000143549	TPM3	0.565837	ENSG00000111669	AC020656.129	0.498501	ENSG00000144746	ARL6IP5	0.158462	ENSG00000136942	RPL35	0.208725				ENSG00000165527	ARF6	0.658575	ENSG00000204592	HLA-E	0.304957	ENSG00000085265	FCN1	0.279234	ENSG00000100300	TSPO	0.438252	ENSG00000159840	ZYX	0.335698	ENSG00000179094	PER1	0.492967	ENSG00000142089	IFITM3	0.813182	ENSG00000132842	AP3B1	0.502347	ENSG00000137500	CCDC90B	1.51385	ENSG00000172216	CEBPB	1.32671	ENSG00000173846	PLK3
ENSG00000110848	CD69	0.277149	ENSG00000100387	RBX1	0.56102	ENSG00000135535	AC020656.130	0.498501	ENSG00000185811	IKZF1	0.157482	ENSG00000089737	DDX24	0.207829				ENSG00000211450	SELENOH	0.65244	ENSG00000198668	CALM1	0.304136	ENSG00000075415	SLC25A3	0.276979	ENSG00000099795	NDUFB7	0.438252	ENSG00000165280	VCP	0.33543	ENSG00000145725	PPIP5K2	0.491597	ENSG00000131724	IL13RA1	0.810148	ENSG00000131238	PPT1	0.501315	ENSG00000136867	SLC31A2	1.51385	ENSG00000143933	CALM2	1.32214	ENSG00000099901	RANBP1
ENSG00000159023	EPB41	0.277149	ENSG00000083799	CYLD	0.553764	ENSG00000234545	AC020656.131	0.494608	ENSG00000140575	IQGAP1	0.155542	ENSG00000120727	PAIP2	0.206811				ENSG00000042753	AP2S1	0.647687	ENSG00000122862	SRGN	0.302871	ENSG00000183283	DAZAP2	0.274725	ENSG00000113732	ATP6V0E1	0.437625	ENSG00000169967	MAP3K2	0.335318	ENSG00000099977	DDT	0.491268	ENSG00000204386	NEU1	0.810148	ENSG00000135899	SP110	0.499113	ENSG00000129292	PHF20L1	1.51385	ENSG00000110955	ATP5F1B	1.28032	ENSG00000149781	FERMT3
ENSG00000167658	EEF2	0.276531	ENSG00000118640	VAMP8	0.553764	ENSG00000127528	AC020656.132	0.49425	ENSG00000154518	ATP5MC3	0.154884	ENSG00000142864	SERBP1	0.205802				ENSG00000178127	NDUFV2	0.647687	ENSG00000135940	COX5B	0.301402	ENSG00000221869	CEBPD	0.274006	ENSG00000187735	TCEA1	0.43629	ENSG00000167460	TPM4	0.333373	ENSG00000059377	TBXAS1	0.491268	ENSG00000010256	UQCRC1	0.810148	ENSG00000169032	MAP2K1	0.499113	ENSG00000025796	SEC63	1.51385	ENSG00000223865	HLA-DPB1	1.28032	ENSG00000285437	POLR2J3
ENSG00000176340	COX8A	0.266619	ENSG00000145675	PIK3R1	0.552342	ENSG00000074800	AC020656.133	0.493609	ENSG00000127528	KLF2	0.153131	ENSG00000123416	TUBA1B	0.205521				ENSG00000112799	LY86	0.647687	ENSG00000147168	IL2RG	0.300578	ENSG00000135441	BLOC1S1	0.268411	ENSG00000121966	CXCR4	0.434558	ENSG00000186407	CD300E	0.333328	ENSG00000122565	CBX3	0.490209	ENSG00000132792	CTNNBL1	0.807224	ENSG00000156030	ELMSAN1	0.498287	ENSG00000151694	ADAM17	1.51385	ENSG00000144713	RPL32	1.27378	ENSG00000142327	RNPEPL1
ENSG00000144746	ARL6IP5	0.255839	ENSG00000134294	SLC38A2	0.548728	ENSG00000183283	AC020656.134	0.488443	ENSG00000104979	C19orf53	0.146971	ENSG00000126267	COX6B1	0.205215				ENSG00000138495	COX17	0.647687	ENSG00000108518	PFN1	0.299893	ENSG00000271614	ATP2B1-AS1	0.26646	ENSG00000126777	KTN1	0.431473	ENSG00000135241	PNPLA8	0.33236	ENSG00000100796	PPP4R3A	0.489993	ENSG00000100813	ACIN1	0.807224	ENSG00000261371	PECAM1	0.497327	ENSG00000157916	RER1	1.51385	ENSG00000135046	ANXA1	1.27323	ENSG00000182831	C16orf72
ENSG00000130770	ATP5IF1	0.253104	ENSG00000111669	TPI1	0.547996	ENSG00000174021	AC020656.135	0.479604	ENSG00000092010	PSME1	0.145753	ENSG00000163466	ARPC2	0.204794				ENSG00000065413	ANKRD44	0.647687	ENSG00000127540	UQCR11	0.297078	ENSG00000241468	ATP5MF	0.264376	ENSG00000126264	HCST	0.428033	ENSG00000173821	RNF213	0.33189	ENSG00000198909	MAP3K3	0.487159	ENSG00000175567	UCP2	0.805802	ENSG00000184897	H1FX	0.496836	ENSG00000135677	GNS	1.51385	ENSG00000074800	ENO1	1.27086	ENSG00000126860	EVI2A
ENSG00000081320	STK17B	0.250677	ENSG00000142669	SH3BGRL3	0.545345	ENSG00000142669	AC020656.136	0.477469	ENSG00000123505	AMD1	0.145343	ENSG00000198258	UBL5	0.203834				ENSG00000254999	BRK1	0.647687	ENSG00000127528	KLF2	0.296347	ENSG00000074800	ENO1	0.264012	ENSG00000164924	YWHAZ	0.42493	ENSG00000162923	WDR26	0.330621	ENSG00000137752	CASP1	0.485522	ENSG00000101265	RASSF2	0.801686	ENSG00000115415	STAT1	0.496195	ENSG00000127528	KLF2	1.50416	ENSG00000108298	RPL19	1.26815	ENSG00000196230	TUBB
ENSG00000174748	RPL15	0.246471	ENSG00000130844	ZNF331	0.539958	ENSG00000118640	AC020656.137	0.470103	ENSG00000132963	POMP	0.144591	ENSG00000184007	PTP4A2	0.201832				ENSG00000099624	ATP5F1D	0.642273	ENSG00000162511	LAPTM5	0.29535	ENSG00000099624	ATP5F1D	0.262565	ENSG00000245532	NEAT1	0.423434	ENSG00000123338	NCKAP1L	0.33016	ENSG00000188313	PLSCR1	0.484455	ENSG00000167851	CD300A	0.79943	ENSG00000204103	MAFB	0.496195	ENSG00000101596	SMCHD1	1.4979	ENSG00000089157	RPLP0	1.26134	ENSG00000237541	HLA-DQA2
ENSG00000131469	RPL27	0.243093	ENSG00000101347	SAMHD1	0.539958	ENSG00000077549	AC020656.138	0.464864	ENSG00000241343	RPL36A	0.142322	ENSG00000125347	IRF1	0.199431				ENSG00000204642	HLA-F	0.642273	ENSG00000172531	PPP1CA	0.293212	ENSG00000164713	BRI3	0.26059	ENSG00000169442	CD52	0.422418	ENSG00000137767	SQOR	0.328429	ENSG00000087266	SH3BP2	0.48272	ENSG00000127125	PPCS	0.79943	ENSG00000121316	PLBD1	0.495646	ENSG00000140379	BCL2A1	1.4979	ENSG00000116741	RGS2	1.25997	ENSG00000185950	IRS2
ENSG00000277734	TRAC	0.2429	ENSG00000131171	SH3BGRL	0.53356	ENSG00000081320	AC020656.139	0.463809	ENSG00000182866	LCK	0.141832	ENSG00000167658	EEF2	0.197897				ENSG00000170873	MTSS1	0.638227	ENSG00000034510	TMSB10	0.292714	ENSG00000204525	HLA-C	0.258041	ENSG00000147274	RBMX	0.417373	ENSG00000152558	TMEM123	0.328413	ENSG00000143878	RHOB	0.481779	ENSG00000077147	TM9SF3	0.796524	ENSG00000055044	NOP58	0.495204	ENSG00000171051	FPR1	1.48583	ENSG00000136942	RPL35	1.25751	ENSG00000188906	LRRK2
ENSG00000215301	DDX3X	0.242457	ENSG00000099860	GADD45B	0.531619	ENSG00000184007	AC020656.140	0.461272	ENSG00000196531	NACA	0.141759	ENSG00000164096	C4orf3	0.196403				ENSG00000102007	PLP2	0.638227	ENSG00000123505	AMD1	0.292575	ENSG00000034510	TMSB10	0.256525	ENSG00000185043	CIB1	0.416925	ENSG00000160710	ADAR	0.328153	ENSG00000106682	EIF4H	0.478277	ENSG00000245532	NEAT1	0.792487	ENSG00000120063	GNA13	0.492079	ENSG00000180628	PCGF5	1.48583	ENSG00000198712	MT-CO2	1.25676	ENSG00000196954	CASP4
ENSG00000111348	ARHGDIB	0.240409	ENSG00000159388	BTG2	0.531546	ENSG00000144746	AC020656.141	0.457135	ENSG00000127184	COX7C	0.141172	ENSG00000132432	SEC61G	0.194395				ENSG00000127540	UQCR11	0.635087	ENSG00000116288	PARK7	0.289049	ENSG00000075624	ACTB	0.256475	ENSG00000168209	DDIT4	0.415532	ENSG00000110057	UNC93B1	0.32811	ENSG00000109743	BST1	0.476506	ENSG00000125844	RRBP1	0.791039	ENSG00000108774	RAB5C	0.491967	ENSG00000170525	PFKFB3	1.48583	ENSG00000197958	RPL12	1.24814	ENSG00000169896	ITGAM
ENSG00000204628	RACK1	0.237181	ENSG00000127483	HP1BP3	0.53068	ENSG00000075415	AC020656.142	0.455909	ENSG00000172809	RPL38	0.137032	ENSG00000107223	EDF1	0.193005				ENSG00000100353	EIF3D	0.63258	ENSG00000099795	NDUFB7	0.287046	ENSG00000111669	TPI1	0.255773	ENSG00000140941	MAP1LC3B	0.415532	ENSG00000151694	ADAM17	0.327644	ENSG00000113013	HSPA9	0.474773	ENSG00000067066	SP100	0.790164	ENSG00000197601	FAR1	0.491142	ENSG00000155096	AZIN1	1.48583	ENSG00000179820	MYADM	1.22261	ENSG00000132205	EMILIN2
ENSG00000175463	TBC1D10C	0.234283	ENSG00000150991	UBC	0.52907	ENSG00000156411	AC020656.143	0.455378	ENSG00000172757	CFL1	0.135852	ENSG00000109332	UBE2D3	0.187768				ENSG00000166136	NDUFB8	0.63258	ENSG00000105404	RABAC1	0.285333	ENSG00000173915	ATP5MD	0.254623	ENSG00000002586	CD99	0.414701	ENSG00000183011	NAA38	0.326267	ENSG00000163527	STT3B	0.474773	ENSG00000112343	TRIM38	0.789613	ENSG00000266412	NCOA4	0.491142	ENSG00000154589	LY96	1.48583	ENSG00000121064	SCPEP1	1.22261	ENSG00000150977	RILPL2
ENSG00000074800	ENO1	0.234283	ENSG00000130592	LSP1	0.528463	ENSG00000002586	AC020656.144	0.45231	ENSG00000182774	RPS17	0.135739	ENSG00000180879	SSR4	0.183874				ENSG00000067900	ROCK1	0.622596	ENSG00000101182	PSMA7	0.283024	ENSG00000165732	DDX21	0.253536	ENSG00000272256	AC044849.1	0.412504	ENSG00000153922	CHD1	0.325702	ENSG00000110057	UNC93B1	0.473948	ENSG00000179262	RAD23A	0.787186	ENSG00000169508	GPR183	0.490089	ENSG00000106003	LFNG	1.48583	ENSG00000103811	CTSH	1.22261	ENSG00000119979	FAM45A
ENSG00000159140	SON	0.227313	ENSG00000128739	SNRPN	0.527467	ENSG00000116288	AC020656.145	0.449214	ENSG00000105193	RPS16	0.13547	ENSG00000169976	SF3B5	0.182358				ENSG00000115944	COX7A2L	0.622596	ENSG00000020633	RUNX3	0.282231	ENSG00000196924	FLNA	0.241809	ENSG00000164919	COX6C	0.408442	ENSG00000105514	RAB3D	0.325334	ENSG00000104388	RAB2A	0.473315	ENSG00000138592	USP8	0.787186	ENSG00000178695	KCTD12	0.489242	ENSG00000117592	PRDX6	1.48583	ENSG00000126883	NUP214	1.22261	ENSG00000108179	PPIF
ENSG00000197958	RPL12	0.226739	ENSG00000144746	ARL6IP5	0.526283	ENSG00000164924	AC020656.146	0.445855	ENSG00000130592	LSP1	0.134558	ENSG00000112695	COX7A2	0.180108				ENSG00000101109	STK4	0.616755	ENSG00000134333	LDHA	0.281675	ENSG00000131171	SH3BGRL	0.239856	ENSG00000204642	HLA-F	0.40627	ENSG00000126860	EVI2A	0.323129	ENSG00000197943	PLCG2	0.472238	ENSG00000137767	SQOR	0.787186	ENSG00000110917	MLEC	0.488521	ENSG00000158869	FCER1G	1.47715	ENSG00000128524	ATP6V1F	1.22261	ENSG00000176101	SSNA1
ENSG00000116824	CD2	0.226155	ENSG00000139218	SCAF11	0.525459	ENSG00000104904	AC020656.147	0.442271	ENSG00000150459	SAP18	0.133844	ENSG00000101745	ANKRD12	0.178452				ENSG00000171159	C9orf16	0.610212	ENSG00000170776	AKAP13	0.280547	ENSG00000103363	ELOB	0.235926	ENSG00000124942	AHNAK	0.403459	ENSG00000179094	PER1	0.321721	ENSG00000163565	IFI16	0.470858	ENSG00000158710	TAGLN2	0.786222	ENSG00000150867	PIP4K2A	0.488141	ENSG00000149357	LAMTOR1	1.46876	ENSG00000158825	CDA	1.22261	ENSG00000173334	TRIB1
ENSG00000171858	RPS21	0.225569	ENSG00000115875	SRSF7	0.520392	ENSG00000116209	AC020656.148	0.442024	ENSG00000198830	HMGN2	0.129263	ENSG00000147274	RBMX	0.172262				ENSG00000131171	SH3BGRL	0.602833	ENSG00000143549	TPM3	0.280531	ENSG00000171530	TBCA	0.234132	ENSG00000198804	MT-CO1	0.401939	ENSG00000180776	ZDHHC20	0.320876	ENSG00000124357	NAGK	0.465551	ENSG00000162444	RBP7	0.780928	ENSG00000179119	SPTY2D1	0.487907	ENSG00000113441	LNPEP	1.46876	ENSG00000123349	PFDN5	1.21933	ENSG00000155090	KLF10
ENSG00000169100	SLC25A6	0.219685	ENSG00000154518	ATP5MC3	0.517932	ENSG00000141002	AC020656.149	0.439789	ENSG00000169230	PRELID1	0.128165	ENSG00000065518	NDUFB4	0.172045				ENSG00000143933	CALM2	0.600994	ENSG00000186469	GNG2	0.279624	ENSG00000124795	DEK	0.233395	ENSG00000111786	SRSF9	0.400885	ENSG00000153250	RBMS1	0.320524	ENSG00000139679	LPAR6	0.464135	ENSG00000183486	MX2	0.773065	ENSG00000111817	DSE	0.487907	ENSG00000130775	THEMIS2	1.46876	ENSG00000171858	RPS21	1.21455	ENSG00000078674	PCM1
ENSG00000171863	RPS7	0.216194	ENSG00000265241	RBM8A	0.516927	ENSG00000108518	AC020656.150	0.433408	ENSG00000137441	FGFBP2	0.126436	ENSG00000229117	RPL41	0.170957				ENSG00000132432	SEC61G	0.600159	ENSG00000167996	FTH1	0.27705	ENSG00000180353	HCLS1	0.233254	ENSG00000136819	C9orf78	0.400885	ENSG00000163565	IFI16	0.318843	ENSG00000144895	EIF2A	0.464135	ENSG00000121579	NAA50	0.773065	ENSG00000138592	USP8	0.486917	ENSG00000144802	NFKBIZ	1.46446	ENSG00000197756	RPL37A	1.20859	ENSG00000147202	DIAPH2
ENSG00000108298	RPL19	0.213934	ENSG00000172115	CYCS	0.514536	ENSG00000172428	AC020656.151	0.4316	ENSG00000168209	DDIT4	0.124787	ENSG00000134333	LDHA	0.169336				ENSG00000185088	RPS27L	0.597934	ENSG00000134294	SLC38A2	0.27357	ENSG00000116288	PARK7	0.227602	ENSG00000128016	ZFP36	0.395849	ENSG00000110422	HIPK3	0.31694	ENSG00000117151	CTBS	0.462637	ENSG00000169926	KLF13	0.772302	ENSG00000143226	FCGR2A	0.484645	ENSG00000172322	CLEC12A	1.45282	ENSG00000118181	RPS25	1.20781	ENSG00000145782	ATG12
ENSG00000111011	RSRC2	0.210035	ENSG00000132475	H3F3B	0.513083	ENSG00000198804	AC020656.152	0.427554	ENSG00000138071	ACTR2	0.124689	ENSG00000118680	MYL12B	0.161713				ENSG00000158710	TAGLN2	0.590174	ENSG00000092010	PSME1	0.271973	ENSG00000067082	KLF6	0.217906	ENSG00000099783	HNRNPM	0.39475	ENSG00000172115	CYCS	0.315393	ENSG00000183172	SMDT1	0.462087	ENSG00000092964	DPYSL2	0.771146	ENSG00000165813	CCDC186	0.484466	ENSG00000196961	AP2A1	1.39837	ENSG00000142541	RPL13A	1.20693	ENSG00000113163	COL4A3BP
ENSG00000047410	TPR	0.210035	ENSG00000113141	IK	0.512737	ENSG00000163466	AC020656.153	0.426797	ENSG00000188243	COMMD6	0.123363	ENSG00000077549	CAPZB	0.160824				ENSG00000143799	PARP1	0.588186	ENSG00000113732	ATP6V0E1	0.268011	ENSG00000198886	MT-ND4	0.216691	ENSG00000129562	DAD1	0.39205	ENSG00000091317	CMTM6	0.312677	ENSG00000160710	ADAR	0.458104	ENSG00000237541	HLA-DQA2	0.768469	ENSG00000131724	IL13RA1	0.484466	ENSG00000171298	GAA	1.39837	ENSG00000084207	GSTP1	1.20483	ENSG00000181381	DDX60L
ENSG00000075415	SLC25A3	0.210035	ENSG00000197061	HIST1H4C	0.506791	ENSG00000080824	AC020656.154	0.426618	ENSG00000164032	H2AFZ	0.122621	ENSG00000121966	CXCR4	0.15923				ENSG00000168421	RHOH	0.580259	ENSG00000172428	COPS9	0.26487	ENSG00000129003	VPS13C	0.215661	ENSG00000084207	GSTP1	0.385537	ENSG00000249437	NAIP	0.312538	ENSG00000116604	MEF2D	0.456441	ENSG00000173821	RNF213	0.768327	ENSG00000152518	ZFP36L2	0.483729	ENSG00000108622	ICAM2	1.39837	ENSG00000198938	MT-CO3	1.2045	ENSG00000002549	LAP3
ENSG00000129824	RPS4Y1	0.210035	ENSG00000162368	CMPK1	0.505401	ENSG00000125347	AC020656.155	0.425798	ENSG00000126267	COX6B1	0.122424	ENSG00000129824	RPS4Y1	0.158854				ENSG00000123505	AMD1	0.573686	ENSG00000173915	ATP5MD	0.262444	ENSG00000139644	TMBIM6	0.215582	ENSG00000213719	CLIC1	0.385537	ENSG00000120705	ETF1	0.311775	ENSG00000163902	RPN1	0.456441	ENSG00000275052	PPP4R3B	0.76516	ENSG00000168488	ATXN2L	0.482865	ENSG00000161654	LSM12	1.39837	ENSG00000174748	RPL15	1.20409	ENSG00000157500	APPL1
ENSG00000160888	IER2	0.210035	ENSG00000167863	ATP5PD	0.500889	ENSG00000081237	AC020656.156	0.4238	ENSG00000124942	AHNAK	0.121618	ENSG00000173272	MZT2A	0.158168				ENSG00000026297	RNASET2	0.573686	ENSG00000111229	ARPC3	0.262268	ENSG00000011600	TYROBP	0.213552	ENSG00000143549	TPM3	0.383935	ENSG00000103811	CTSH	0.311641	ENSG00000110446	SLC15A3	0.456441	ENSG00000059728	MXD1	0.761892	ENSG00000130748	TMEM160	0.482047	ENSG00000103249	CLCN7	1.39837	ENSG00000117984	CTSD	1.19286	ENSG00000104824	HNRNPL
ENSG00000124172	ATP5F1E	0.210035	ENSG00000135655	USP15	0.499316	ENSG00000235162	AC020656.157	0.423488	ENSG00000177954	RPS27	0.117886	ENSG00000130811	EIF3G	0.156702				ENSG00000247982	LINC00926	0.569185	ENSG00000197971	MBP	0.261334	ENSG00000127540	UQCR11	0.212071	ENSG00000010404	IDS	0.379772	ENSG00000169895	SYAP1	0.310923	ENSG00000108582	CPD	0.453867	ENSG00000162645	GBP2	0.761576	ENSG00000027697	IFNGR1	0.481356	ENSG00000139726	DENR	1.39837	ENSG00000034510	TMSB10	1.18684	ENSG00000166888	STAT6
ENSG00000184009	ACTG1	0.205234	ENSG00000164548	TRA2A	0.498248	ENSG00000183648	AC020656.158	0.422009	ENSG00000135048	CEMIP2	0.117563	ENSG00000146386	ABRACL	0.154343				ENSG00000198931	APRT	0.566491	ENSG00000103363	ELOB	0.25771	ENSG00000118503	TNFAIP3	0.20821	ENSG00000205542	TMSB4X	0.378637	ENSG00000165672	PRDX3	0.308671	ENSG00000149923	PPP4C	0.451967	ENSG00000103642	LACTB	0.75402	ENSG00000059728	MXD1	0.480253	ENSG00000110931	CAMKK2	1.39837	ENSG00000128016	ZFP36	1.18533	ENSG00000215021	PHB2
ENSG00000198786	MT-ND5	0.204253	ENSG00000120616	EPC1	0.495104	ENSG00000092010	AC020656.159	0.421413	ENSG00000135441	BLOC1S1	0.11733	ENSG00000164924	YWHAZ	0.152363				ENSG00000113811	SELENOK	0.566491	ENSG00000115956	PLEK	0.25244	ENSG00000183648	NDUFB1	0.206423	ENSG00000167286	CD3D	0.377688	ENSG00000140368	PSTPIP1	0.308412	ENSG00000173559	NABP1	0.446337	ENSG00000127603	MACF1	0.751221	ENSG00000100567	PSMA3	0.478214	ENSG00000139318	DUSP6	1.39837	ENSG00000118503	TNFAIP3	1.17775	ENSG00000181467	RAP2B
ENSG00000168685	IL7R	0.201907	ENSG00000100911	PSME2	0.494155	ENSG00000197111	AC020656.160	0.421144	ENSG00000134884	ARGLU1	0.117122	ENSG00000171530	TBCA	0.152363				ENSG00000105887	MTPN	0.555764	ENSG00000185201	IFITM2	0.24865	ENSG00000067560	RHOA	0.202968	ENSG00000198786	MT-ND5	0.376178	ENSG00000071553	ATP6AP1	0.308001	ENSG00000114127	XRN1	0.443525	ENSG00000147649	MTDH	0.746545	ENSG00000123329	ARHGAP9	0.477579	ENSG00000182022	CHST15	1.39837	ENSG00000166927	MS4A7	1.16249	ENSG00000119535	CSF3R
ENSG00000065978	YBX1	0.194094	ENSG00000108669	CYTH1	0.490792	ENSG00000034510	AC020656.161	0.41238	ENSG00000078304	PPP2R5C	0.11669	ENSG00000130429	ARPC1B	0.150866				ENSG00000185262	UBALD2	0.555764	ENSG00000204264	PSMB8	0.244877	ENSG00000167658	EEF2	0.202633	ENSG00000198727	MT-CYB	0.375529	ENSG00000172845	SP3	0.307391	ENSG00000116539	ASH1L	0.443525	ENSG00000090376	IRAK3	0.745607	ENSG00000198843	SELENOT	0.477086	ENSG00000102081	FMR1	1.39837	ENSG00000177156	TALDO1	1.16249	ENSG00000170296	GABARAP
ENSG00000211450	SELENOH	0.191657	ENSG00000076662	ICAM3	0.489553	ENSG00000150093	AC020656.162	0.411099	ENSG00000116288	PARK7	0.116517	ENSG00000174748	RPL15	0.148389				ENSG00000250479	CHCHD10	0.54984	ENSG00000122545	2021-09-07	0.241875	ENSG00000084234	APLP2	0.202283	ENSG00000005483	KMT2E	0.37224	ENSG00000096968	JAK2	0.30622	ENSG00000100596	SPTLC2	0.442979	ENSG00000170581	STAT2	0.74484	ENSG00000054967	RELT	0.475875	ENSG00000169446	MMGT1	1.39837	ENSG00000106546	AHR	1.16249	ENSG00000140968	IRF8
ENSG00000225921	NOL7	0.190136	ENSG00000173821	RNF213	0.485096	ENSG00000131174	AC020656.163	0.40945	ENSG00000108107	RPL28	0.11628	ENSG00000168066	SF1	0.146257				ENSG00000125354	2021-09-06	0.54984	ENSG00000124942	AHNAK	0.241449	ENSG00000110321	EIF4G2	0.197862	ENSG00000115165	CYTIP	0.371784	ENSG00000149187	CELF1	0.304843	ENSG00000125995	ROMO1	0.435473	ENSG00000123358	NR4A1	0.743195	ENSG00000147684	NDUFB9	0.474694	ENSG00000055211	GINM1	1.39837	ENSG00000164346	NSA2	1.16249	ENSG00000090238	YPEL3
ENSG00000069275	NUCKS1	0.18834	ENSG00000106052	TAX1BP1	0.484917	ENSG00000197943	AC020656.164	0.409432	ENSG00000110321	EIF4G2	0.115653	ENSG00000221983	UBA52	0.144923				ENSG00000091490	SEL1L3	0.545117	ENSG00000126264	HCST	0.241323	ENSG00000130592	LSP1	0.197545	ENSG00000134294	SLC38A2	0.369819	ENSG00000183023	SLC8A1	0.304472	ENSG00000033800	PIAS1	0.433933	ENSG00000111142	METAP2	0.740831	ENSG00000171206	TRIM8	0.472348	ENSG00000112406	HECA	1.39837	ENSG00000163466	ARPC2	1.16249	ENSG00000110917	MLEC
ENSG00000149806	FAU	0.18786	ENSG00000078674	PCM1	0.478558	ENSG00000101182	AC020656.165	0.408021	ENSG00000105640	RPL18A	0.114611	ENSG00000076662	ICAM3	0.143724				ENSG00000113387	SUB1	0.545117	ENSG00000118363	SPCS2	0.240463	ENSG00000105193	RPS16	0.193556	ENSG00000075415	SLC25A3	0.369435	ENSG00000145819	ARHGAP26	0.301891	ENSG00000156587	UBE2L6	0.433108	ENSG00000110422	HIPK3	0.740286	ENSG00000126860	EVI2A	0.47132	ENSG00000111912	NCOA7	1.39837	ENSG00000161970	RPL26	1.14188	ENSG00000078668	VDAC3
ENSG00000113387	SUB1	0.187315	ENSG00000197956	S100A6	0.476455	ENSG00000212907	AC020656.166	0.406803	ENSG00000180879	SSR4	0.114313	ENSG00000167996	FTH1	0.143654				ENSG00000127528	KLF2	0.538811	ENSG00000101608	MYL12A	0.240236	ENSG00000111229	ARPC3	0.193524	ENSG00000169230	PRELID1	0.368463	ENSG00000273338	AC103591.3	0.301164	ENSG00000168438	CDC40	0.431262	ENSG00000135046	ANXA1	0.739972	ENSG00000165672	PRDX3	0.468181	ENSG00000248810	LINC02432	1.39837	ENSG00000149806	FAU	1.13928	ENSG00000106617	PRKAG2
ENSG00000140988	RPS2	0.17585	ENSG00000198888	MT-ND1	0.473408	ENSG00000197971	AC020656.167	0.402271	ENSG00000109971	HSPA8	0.113831	ENSG00000166913	YWHAB	0.141572				ENSG00000240972	MIF	0.536212	ENSG00000067560	RHOA	0.237312	ENSG00000048740	CELF2	0.193487	ENSG00000112576	CCND3	0.364906	ENSG00000119979	FAM45A	0.299809	ENSG00000085832	EPS15	0.431262	ENSG00000285437	POLR2J3	0.737146	ENSG00000171988	JMJD1C	0.466471	ENSG00000145241	CENPC	1.39837	ENSG00000164587	RPS14	1.13348	ENSG00000137393	RNF144B
ENSG00000177410	ZFAS1	0.173509	ENSG00000265972	TXNIP	0.472922	ENSG00000130429	AC020656.168	0.400768	ENSG00000239713	APOBEC3G	0.113306	ENSG00000127540	UQCR11	0.141392				ENSG00000166295	ANAPC16	0.531679	ENSG00000135048	CEMIP2	0.233601	ENSG00000143549	TPM3	0.191433	ENSG00000003402	CFLAR	0.364906	ENSG00000104131	EIF3J	0.298875	ENSG00000183291	SELENOF	0.43009	ENSG00000125148	MT2A	0.734764	ENSG00000179639	FCER1A	0.465501	ENSG00000178057	NDUFAF3	1.39837	ENSG00000148834	GSTO1	1.13146	ENSG00000170802	FOXN2
ENSG00000134825	TMEM258	0.173509	ENSG00000122566	HNRNPA2B1	0.470917	ENSG00000132963	AC020656.169	0.399919	ENSG00000198804	MT-CO1	0.110866	ENSG00000147123	NDUFB11	0.13981				ENSG00000125971	DYNLRB1	0.529292	ENSG00000138071	ACTR2	0.232329	ENSG00000104904	OAZ1	0.19049	ENSG00000168066	SF1	0.3618	ENSG00000163162	RNF149	0.298812	ENSG00000155115	GTF3C6	0.427872	ENSG00000167522	ANKRD11	0.730603	ENSG00000115232	ITGA4	0.464486	ENSG00000162909	CAPN2	1.39837	ENSG00000172354	GNB2	1.13146	ENSG00000055070	SZRD1
ENSG00000067560	RHOA	0.170507	ENSG00000100028	SNRPD3	0.470565	ENSG00000127922	AC020656.170	0.398858	ENSG00000182196	ARL6IP4	0.109869	ENSG00000255823	MTRNR2L8	0.139652				ENSG00000196628	TCF4	0.529292	ENSG00000173726	TOMM20	0.228257	ENSG00000146066	HIGD2A	0.189721	ENSG00000212907	MT-ND4L	0.357816	ENSG00000127603	MACF1	0.298451	ENSG00000062716	VMP1	0.427872	ENSG00000135124	P2RX4	0.730603	ENSG00000103342	GSPT1	0.463859	ENSG00000266028	SRGAP2	1.39837	ENSG00000113269	RNF130	1.13146	ENSG00000171159	C9orf16
ENSG00000132341	RAN	0.166966	ENSG00000198763	MT-ND2	0.470537	ENSG00000026025	AC020656.171	0.398663	ENSG00000124172	ATP5F1E	0.108862	ENSG00000148303	RPL7A	0.138608				ENSG00000135404	CD63	0.529292	ENSG00000106829	TLE4	0.226132	ENSG00000212907	MT-ND4L	0.188004	ENSG00000128340	RAC2	0.356638	ENSG00000185950	IRS2	0.298315	ENSG00000141298	SSH2	0.426529	ENSG00000138061	CYP1B1	0.730603	ENSG00000117984	CTSD	0.460673	ENSG00000143226	FCGR2A	1.39837	ENSG00000166441	RPL27A	1.12697	ENSG00000125810	CD93
ENSG00000112576	CCND3	0.166966	ENSG00000081320	STK17B	0.469569	ENSG00000115738	AC020656.172	0.39855	ENSG00000241468	ATP5MF	0.108519	ENSG00000188186	LAMTOR4	0.138424				ENSG00000182004	SNRPE	0.529292	ENSG00000115091	ACTR3	0.225985	ENSG00000198804	MT-CO1	0.18598	ENSG00000160654	CD3G	0.353893	ENSG00000204642	HLA-F	0.298181	ENSG00000120868	APAF1	0.42426	ENSG00000147526	TACC1	0.726499	ENSG00000138069	RAB1A	0.460445	ENSG00000100523	DDHD1	1.39837	ENSG00000051523	CYBA	1.12622	ENSG00000171206	TRIM8
ENSG00000148303	RPL7A	0.166888	ENSG00000125995	ROMO1	0.469569	ENSG00000183172	AC020656.173	0.398493	ENSG00000198755	RPL10A	0.104592	ENSG00000198242	RPL23A	0.130775				ENSG00000067064	IDI1	0.526381	ENSG00000198888	MT-ND1	0.225162	ENSG00000164346	NSA2	0.184606	ENSG00000113387	SUB1	0.351247	ENSG00000138814	PPP3CA	0.297917	ENSG00000138029	HADHB	0.424019	ENSG00000076662	ICAM3	0.724971	ENSG00000123066	MED13L	0.458227	ENSG00000170581	STAT2	1.39837	ENSG00000059804	SLC2A3	1.1104	ENSG00000175602	CCDC85B
ENSG00000100100	PIK3IP1	0.162729	ENSG00000067560	RHOA	0.468222	ENSG00000265972	AC020656.174	0.398051	ENSG00000148362	PAXX	0.103734	ENSG00000140988	RPS2	0.130355				ENSG00000070190	DAPP1	0.526381	ENSG00000234745	HLA-B	0.222103	ENSG00000197747	S100A10	0.184104	ENSG00000129968	ABHD17A	0.336755	ENSG00000076944	STXBP2	0.295613	ENSG00000176978	DPP7	0.423426	ENSG00000123505	AMD1	0.72423	ENSG00000130414	NDUFA10	0.457533	ENSG00000023318	ERP44	1.39837	ENSG00000034152	MAP2K3	1.09975	ENSG00000133106	EPSTI1
ENSG00000185811	IKZF1	0.159409	ENSG00000231925	TAPBP	0.462616	ENSG00000111640	AC020656.175	0.397492	ENSG00000172115	CYCS	0.103362	ENSG00000184009	ACTG1	0.129768				ENSG00000106028	SSBP1	0.524056	ENSG00000133321	RARRES3	0.221812	ENSG00000172115	CYCS	0.182438	ENSG00000137876	RSL24D1	0.336755	ENSG00000204592	HLA-E	0.295414	ENSG00000170515	PA2G4	0.421719	ENSG00000099875	MKNK2	0.720072	ENSG00000162368	CMPK1	0.457533	ENSG00000106400	ZNHIT1	1.39837	ENSG00000110324	IL10RA	1.09975	ENSG00000173141	MRPL57
ENSG00000231500	RPS18	0.155448	ENSG00000113712	CSNK1A1	0.461956	ENSG00000198840	AC020656.176	0.393552	ENSG00000229117	RPL41	0.100784	ENSG00000108107	RPL28	0.129205				ENSG00000029363	BCLAF1	0.524056	ENSG00000157514	TSC22D3	0.221071	ENSG00000271503	CCL5	0.179485	ENSG00000080824	HSP90AA1	0.333378	ENSG00000171867	PRNP	0.294942	ENSG00000104824	HNRNPL	0.42064	ENSG00000144579	CTDSP1	0.720072	ENSG00000159377	PSMB4	0.455553	ENSG00000134250	NOTCH2	1.39837	ENSG00000147123	NDUFB11	1.09975	ENSG00000172115	CYCS
ENSG00000118181	RPS25	0.155075	ENSG00000127540	UQCR11	0.456048	ENSG00000175550	AC020656.177	0.390751	ENSG00000111229	ARPC3	0.0994476	ENSG00000196776	CD47	0.129042				ENSG00000130844	ZNF331	0.522156	ENSG00000166598	HSP90B1	0.220718	ENSG00000117614	SYF2	0.17559	ENSG00000169020	ATP5ME	0.329671	ENSG00000127947	PTPN12	0.293522	ENSG00000149357	LAMTOR1	0.420052	ENSG00000144118	RALB	0.720072	ENSG00000170248	PDCD6IP	0.454718	ENSG00000117228	GBP1	1.39837	ENSG00000249437	NAIP	1.09975	ENSG00000220205	VAMP2
ENSG00000009790	TRAF3IP3	0.15454	ENSG00000105939	ZC3HAV1	0.453304	ENSG00000172531	AC020656.178	0.388722	ENSG00000213741	RPS29	0.0994267	ENSG00000115875	SRSF7	0.128475				ENSG00000124795	DEK	0.522156	ENSG00000099783	HNRNPM	0.219604	ENSG00000124831	LRRFIP1	0.170253	ENSG00000114861	FOXP1	0.325041	ENSG00000147454	SLC25A37	0.29309	ENSG00000115762	PLEKHB2	0.419604	ENSG00000162711	NLRP3	0.720072	ENSG00000162889	MAPKAPK2	0.454718	ENSG00000117713	ARID1A	1.39837	ENSG00000168769	TET2	1.09975	ENSG00000027697	IFNGR1
ENSG00000114942	EEF1B2	0.152131	ENSG00000115944	COX7A2L	0.452324	ENSG00000082074	AC020656.179	0.386962	ENSG00000196924	FLNA	0.0993213	ENSG00000136167	LCP1	0.12764				ENSG00000138668	HNRNPD	0.522156	ENSG00000102317	RBM3	0.217391	ENSG00000197111	PCBP2	0.168088	ENSG00000100911	PSME2	0.324264	ENSG00000111913	RIPOR2	0.292897	ENSG00000123338	NCKAP1L	0.418344	ENSG00000183023	SLC8A1	0.717428	ENSG00000213145	CRIP1	0.453534	ENSG00000130592	LSP1	1.36184	ENSG00000163823	CCR1	1.09975	ENSG00000114738	MAPKAPK3
ENSG00000100129	EIF3L	0.151141	ENSG00000129559	NEDD8	0.452163	ENSG00000215301	AC020656.180	0.385121	ENSG00000198899	MT-ATP6	0.0981371	ENSG00000113387	SUB1	0.126862				ENSG00000205581	HMGN1	0.521331	ENSG00000111348	ARHGDIB	0.214367	ENSG00000182196	ARL6IP4	0.165389	ENSG00000108518	PFN1	0.323156	ENSG00000174695	TMEM167A	0.292007	ENSG00000113742	CPEB4	0.418222	ENSG00000011422	PLAUR	0.716452	ENSG00000141429	GALNT1	0.452668	ENSG00000018280	SLC11A1	1.3459	ENSG00000197943	PLCG2	1.0746	ENSG00000164054	SHISA5
ENSG00000132475	H3F3B	0.151141	ENSG00000110848	CD69	0.446849	ENSG00000065978	AC020656.181	0.383424	ENSG00000162244	RPL29	0.0958118	ENSG00000065978	YBX1	0.126008				ENSG00000076662	ICAM3	0.503297	ENSG00000185811	IKZF1	0.212123	ENSG00000204397	CARD16	0.164989	ENSG00000198899	MT-ATP6	0.321496	ENSG00000168175	MAPK1IP1L	0.291691	ENSG00000177556	ATOX1	0.416731	ENSG00000152558	TMEM123	0.716178	ENSG00000144674	GOLGA4	0.451838	ENSG00000143771	CNIH4	1.33697	ENSG00000136490	LIMD2	1.06733	ENSG00000028137	TNFRSF1B
ENSG00000229117	RPL41	0.150309	ENSG00000115935	WIPF1	0.446849	ENSG00000188229	AC020656.182	0.378988	ENSG00000204592	HLA-E	0.0956635	ENSG00000168028	RPSA	0.125974				ENSG00000189067	LITAF	0.503297	ENSG00000196776	CD47	0.211795	ENSG00000169564	PCBP1	0.160578	ENSG00000127603	MACF1	0.321158	ENSG00000101265	RASSF2	0.291577	ENSG00000124795	DEK	0.415899	ENSG00000165678	GHITM	0.708577	ENSG00000156261	CCT8	0.451684	ENSG00000171862	PTEN	1.32437	ENSG00000131143	COX4I1	1.06733	ENSG00000163162	RNF149
ENSG00000167978	SRRM2	0.147299	ENSG00000198821	CD247	0.446849	ENSG00000271503	AC020656.183	0.375905	ENSG00000089327	FXYD5	0.0954212	ENSG00000100300	TSPO	0.122148				ENSG00000164104	HMGB2	0.503297	ENSG00000078304	PPP2R5C	0.208039	ENSG00000116209	TMEM59	0.160433	ENSG00000167552	TUBA1A	0.321158	ENSG00000221869	CEBPD	0.289784	ENSG00000027697	IFNGR1	0.413372	ENSG00000138814	PPP3CA	0.705536	ENSG00000198840	MT-ND3	0.450992	ENSG00000213585	VDAC1	1.32437	ENSG00000159720	ATP6V0D1	1.06733	ENSG00000205413	SAMD9
ENSG00000136942	RPL35	0.147006	ENSG00000188186	LAMTOR4	0.437134	ENSG00000158710	AC020656.184	0.374049	ENSG00000167658	EEF2	0.0943147	ENSG00000105193	RPS16	0.118183				ENSG00000182117	NOP10	0.503297	ENSG00000162191	UBXN1	0.206759	ENSG00000104408	EIF3E	0.159377	ENSG00000129128	SPCS3	0.320657	ENSG00000138061	CYP1B1	0.289217	ENSG00000158864	NDUFS2	0.412047	ENSG00000162923	WDR26	0.705536	ENSG00000172243	CLEC7A	0.450883	ENSG00000103381	CPPED1	1.31591	ENSG00000137801	THBS1	1.06733	ENSG00000057657	PRDM1
ENSG00000150593	PDCD4	0.145905	ENSG00000164924	YWHAZ	0.437001	ENSG00000169926	AC020656.185	0.372606	ENSG00000134419	RPS15A	0.0926764	ENSG00000008018	PSMB1	0.115508				ENSG00000135185	TMEM243	0.503297	ENSG00000165527	ARF6	0.204584	ENSG00000081237	PTPRC	0.158964	ENSG00000131236	CAP1	0.315996	ENSG00000164308	ERAP2	0.289104	ENSG00000241399	CD302	0.409457	ENSG00000168438	CDC40	0.702794	ENSG00000175348	TMEM9B	0.450459	ENSG00000182220	ATP6AP2	1.31591	ENSG00000266412	NCOA4	1.06733	ENSG00000111843	TMEM14C
ENSG00000137154	RPS6	0.140741	ENSG00000070831	CDC42	0.431348	ENSG00000155368	AC020656.186	0.372442	ENSG00000160654	CD3G	0.0919747	ENSG00000178980	SELENOW	0.113889				ENSG00000092820	EZR	0.491224	ENSG00000265241	RBM8A	0.200587	ENSG00000126267	COX6B1	0.153561	ENSG00000131174	COX7B	0.315996	ENSG00000188529	SRSF10	0.288228	ENSG00000243317	STMP1	0.409135	ENSG00000151923	TIAL1	0.700309	ENSG00000135829	DHX9	0.450459	ENSG00000260032	NORAD	1.30526	ENSG00000180879	SSR4	1.06733	ENSG00000172936	MYD88
ENSG00000126524	SBDS	0.139646	ENSG00000140941	MAP1LC3B	0.430547	ENSG00000142227	AC020656.187	0.371957	ENSG00000164346	NSA2	0.0911282	ENSG00000008988	RPS20	0.111488				ENSG00000198840	MT-ND3	0.48909	ENSG00000048740	CELF2	0.200351	ENSG00000131174	COX7B	0.152227	ENSG00000111229	ARPC3	0.314319	ENSG00000131236	CAP1	0.287813	ENSG00000162444	RBP7	0.408506	ENSG00000144228	SPOPL	0.700309	ENSG00000153914	SREK1	0.44988	ENSG00000160551	TAOK1	1.30526	ENSG00000153113	CAST	1.06733	ENSG00000184588	PDE4B
ENSG00000125743	SNRPD2	0.135073	ENSG00000172531	PPP1CA	0.430547	ENSG00000145287	AC020656.188	0.370271	ENSG00000087460	GNAS	0.0893275	ENSG00000099622	CIRBP	0.111063				ENSG00000172428	COPS9	0.484681	ENSG00000113811	SELENOK	0.199723	ENSG00000115165	CYTIP	0.151855	ENSG00000065978	YBX1	0.314259	ENSG00000136867	SLC31A2	0.287656	ENSG00000198624	CCDC69	0.407658	ENSG00000198399	ITSN2	0.700309	ENSG00000153827	TRIP12	0.44988	ENSG00000059377	TBXAS1	1.30526	ENSG00000169020	ATP5ME	1.06733	ENSG00000117118	SDHB
ENSG00000174444	RPL4	0.135073	ENSG00000115738	ID2	0.424481	ENSG00000105329	AC020656.189	0.369907	ENSG00000120727	PAIP2	0.0890491	ENSG00000171863	RPS7	0.107906				ENSG00000145287	PLAC8	0.483801	ENSG00000189403	HMGB1	0.199687	ENSG00000166913	YWHAB	0.151352	ENSG00000204569	PPP1R10	0.312204	ENSG00000086730	LAT2	0.28748	ENSG00000134250	NOTCH2	0.407306	ENSG00000124783	SSR1	0.700309	ENSG00000090104	RGS1	0.449431	ENSG00000109321	AREG	1.30526	ENSG00000117523	PRRC2C	1.06733	ENSG00000132530	XAF1
ENSG00000105372	RPS19	0.129417	ENSG00000133574	GIMAP4	0.424481	ENSG00000133574	AC020656.190	0.367611	ENSG00000196262	PPIA	0.0889838	ENSG00000189403	HMGB1	0.107275				ENSG00000180370	PAK2	0.482833	ENSG00000101109	STK4	0.199531	ENSG00000198786	MT-ND5	0.149971	ENSG00000187239	FNBP1	0.31188	ENSG00000163412	EIF4E3	0.287365	ENSG00000059804	SLC2A3	0.40667	ENSG00000125870	SNRPB2	0.698593	ENSG00000043462	LCP2	0.448889	ENSG00000114331	ACAP2	1.30526	ENSG00000197747	S100A10	1.06135	ENSG00000009307	CSDE1
ENSG00000008988	RPS20	0.126535	ENSG00000118680	MYL12B	0.423002	ENSG00000125868	AC020656.191	0.366904	ENSG00000108518	PFN1	0.0887154	ENSG00000265972	TXNIP	0.102975				ENSG00000164713	BRI3	0.477762	ENSG00000117614	SYF2	0.196818	ENSG00000176340	COX8A	0.149041	ENSG00000044574	HSPA5	0.31188	ENSG00000156261	CCT8	0.283929	ENSG00000127603	MACF1	0.404602	ENSG00000080371	RAB21	0.698046	ENSG00000115355	CCDC88A	0.446898	ENSG00000114450	GNB4	1.30526	ENSG00000092010	PSME1	1.0453	ENSG00000127507	ADGRE2
ENSG00000198242	RPL23A	0.12579	ENSG00000139193	CD27	0.42057	ENSG00000204592	AC020656.192	0.366519	ENSG00000255302	EID1	0.0884685	ENSG00000135390	ATP5MC2	0.101737				ENSG00000140941	MAP1LC3B	0.466303	ENSG00000129559	NEDD8	0.193224	ENSG00000092010	PSME1	0.147686	ENSG00000116754	SRSF11	0.31103	ENSG00000141367	CLTC	0.283244	ENSG00000025708	TYMP	0.40382	ENSG00000177663	IL17RA	0.695487	ENSG00000092020	PPP2R3C	0.44587	ENSG00000112096	SOD2	1.28589	ENSG00000160593	JAML	1.0453	ENSG00000157601	MX1
ENSG00000071082	RPL31	0.12028	ENSG00000172005	MAL	0.41828	ENSG00000126264	AC020656.193	0.364046	ENSG00000013441	CLK1	0.0884008	ENSG00000148700	ADD3	0.0956081				ENSG00000144746	ARL6IP5	0.465162	ENSG00000180879	SSR4	0.187268	ENSG00000101347	SAMHD1	0.14768	ENSG00000110848	CD69	0.306248	ENSG00000067829	IDH3G	0.283203	ENSG00000127540	UQCR11	0.403743	ENSG00000146676	PURB	0.694077	ENSG00000168918	INPP5D	0.44587	ENSG00000104823	ECH1	1.27284	ENSG00000105193	RPS16	1.04007	ENSG00000156299	TIAM1
ENSG00000234745	HLA-B	0.120003	ENSG00000273338	AC103591.3	0.40976	ENSG00000241468	AC020656.194	0.363168	ENSG00000197061	HIST1H4C	0.0880038	ENSG00000184076	UQCR10	0.094803				ENSG00000140575	IQGAP1	0.456503	ENSG00000143543	JTB	0.186206	ENSG00000156411	ATP5MPL	0.147362	ENSG00000135046	ANXA1	0.305728	ENSG00000263001	GTF2I	0.282472	ENSG00000083896	YTHDC1	0.402925	ENSG00000152061	RABGAP1L	0.692327	ENSG00000173334	TRIB1	0.444848	ENSG00000022277	RTF2	1.27284	ENSG00000161960	EIF4A1	1.03416	ENSG00000099995	SF3A1
ENSG00000108561	C1QBP	0.116926	ENSG00000138071	ACTR2	0.406207	ENSG00000165527	AC020656.195	0.362696	ENSG00000115541	HSPE1	0.0878165	ENSG00000150459	SAP18	0.0946205				ENSG00000133398	MED10	0.452671	ENSG00000169554	ZEB2	0.185742	ENSG00000143110	C1orf162	0.14723	ENSG00000122545	2021-09-07	0.30294	ENSG00000153827	TRIP12	0.281654	ENSG00000077147	TM9SF3	0.402145	ENSG00000103994	ZNF106	0.690097	ENSG00000180448	ARHGAP45	0.444578	ENSG00000149600	COMMD7	1.27284	ENSG00000041357	PSMA4	1.03416	ENSG00000186818	LILRB4
ENSG00000111371	SLC38A1	0.116926	ENSG00000145833	DDX46	0.402455	ENSG00000102879	AC020656.196	0.361405	ENSG00000131469	RPL27	0.086719	ENSG00000161970	RPL26	0.094363				ENSG00000184203	PPP1R2	0.452671	ENSG00000196262	PPIA	0.181972	ENSG00000136167	LCP1	0.140674	ENSG00000196154	S100A4	0.302102	ENSG00000130775	THEMIS2	0.281368	ENSG00000120705	ETF1	0.401993	ENSG00000137642	SORL1	0.687818	ENSG00000011304	PTBP1	0.444578	ENSG00000136451	VEZF1	1.27284	ENSG00000136758	YME1L1	1.03416	ENSG00000205544	TMEM256
ENSG00000198034	RPS4X	0.115766	ENSG00000125740	FOSB	0.386234	ENSG00000234745	AC020656.197	0.35805	ENSG00000103363	ELOB	0.0850607	ENSG00000105373	NOP53	0.0939625				ENSG00000155957	TMBIM4	0.442755	ENSG00000164032	H2AFZ	0.181808	ENSG00000112695	COX7A2	0.136144	ENSG00000088986	DYNLL1	0.29397	ENSG00000153113	CAST	0.281133	ENSG00000165997	ARL5B	0.401399	ENSG00000149357	LAMTOR1	0.681392	ENSG00000164691	TAGAP	0.443912	ENSG00000126581	BECN1	1.27284	ENSG00000115268	RPS15	1.02885	ENSG00000130731	METTL26
ENSG00000142541	RPL13A	0.114276	ENSG00000048740	CELF2	0.386153	ENSG00000105404	AC020656.198	0.353991	ENSG00000152082	MZT2B	0.0849795	ENSG00000173812	EIF1	0.0926183				ENSG00000002586	CD99	0.442755	ENSG00000175550	DRAP1	0.179871	ENSG00000118640	VAMP8	0.135574	ENSG00000198821	CD247	0.292912	ENSG00000198727	MT-CYB	0.279563	ENSG00000105202	FBL	0.400456	ENSG00000257923	CUX1	0.675218	ENSG00000197622	CDC42SE1	0.439612	ENSG00000184060	ADAP2	1.27284	ENSG00000184009	ACTG1	1.02856	ENSG00000092108	SCFD1
ENSG00000142676	RPL11	0.111407	ENSG00000147065	MSN	0.383839	ENSG00000204389	AC020656.199	0.348412	ENSG00000172183	ISG20	0.0825591	ENSG00000112081	SRSF3	0.0918478				ENSG00000161011	SQSTM1	0.442755	ENSG00000164096	C4orf3	0.176124	ENSG00000188186	LAMTOR4	0.133099	ENSG00000160932	LY6E	0.290461	ENSG00000041357	PSMA4	0.279374	ENSG00000084623	EIF3I	0.398725	ENSG00000085449	WDFY1	0.675218	ENSG00000135905	DOCK10	0.439612	ENSG00000126653	NSRP1	1.27284	ENSG00000198918	RPL39	1.02398	ENSG00000213203	GIMAP1
ENSG00000166441	RPL27A	0.111319	ENSG00000114857	NKTR	0.381557	ENSG00000078304	AC020656.200	0.345004	ENSG00000169976	SF3B5	0.0820422	ENSG00000008517	IL32	0.0884239				ENSG00000169020	ATP5ME	0.436183	ENSG00000109971	HSPA8	0.174317	ENSG00000131236	CAP1	0.131723	ENSG00000189067	LITAF	0.285135	ENSG00000136026	CKAP4	0.279288	ENSG00000223865	HLA-DPB1	0.398472	ENSG00000187605	TET3	0.675218	ENSG00000158716	DUSP23	0.435859	ENSG00000179094	PER1	1.27284	ENSG00000106153	CHCHD2	1.02293	ENSG00000106588	PSMA2
ENSG00000172005	MAL	0.110499	ENSG00000123505	AMD1	0.38076	ENSG00000132424	AC020656.201	0.343494	ENSG00000189403	HMGB1	0.0812887	ENSG00000162704	ARPC5	0.0872149				ENSG00000198727	MT-CYB	0.430994	ENSG00000189043	NDUFA4	0.173567	ENSG00000169714	CNBP	0.130388	ENSG00000188186	LAMTOR4	0.285135	ENSG00000160410	SHKBP1	0.278517	ENSG00000172322	CLEC12A	0.396634	ENSG00000137309	HMGA1	0.67353	ENSG00000221869	CEBPD	0.433882	ENSG00000180304	OAZ2	1.27284	ENSG00000115738	ID2	1.02293	ENSG00000106546	AHR
ENSG00000108107	RPL28	0.11006	ENSG00000140612	SEC11A	0.377954	ENSG00000070756	AC020656.202	0.33688	ENSG00000115268	RPS15	0.0773538	ENSG00000231500	RPS18	0.0854615				ENSG00000131370	SH3BP5	0.428009	ENSG00000168653	NDUFS5	0.169917	ENSG00000174021	GNG5	0.130221	ENSG00000163479	SSR2	0.283967	ENSG00000198668	CALM1	0.276691	ENSG00000198840	MT-ND3	0.3963	ENSG00000068366	ACSL4	0.672051	ENSG00000122694	GLIPR2	0.43365	ENSG00000260916	CCPG1	1.27284	ENSG00000174021	GNG5	1.02293	ENSG00000115677	HDLBP
ENSG00000156508	EEF1A1	0.106564	ENSG00000100129	EIF3L	0.37646	ENSG00000187109	AC020656.203	0.334908	ENSG00000147065	MSN	0.0772041	ENSG00000170315	UBB	0.0852487				ENSG00000196199	MPHOSPH8	0.423127	ENSG00000125356	NDUFA1	0.169835	ENSG00000117984	CTSD	0.124481	ENSG00000125743	SNRPD2	0.283846	ENSG00000131504	DIAPH1	0.276424	ENSG00000053254	FOXN3	0.39364	ENSG00000144597	EAF1	0.670745	ENSG00000035862	TIMP2	0.431344	ENSG00000118939	UCHL3	1.27284	ENSG00000169896	ITGAM	1.01729	ENSG00000136628	EPRS
ENSG00000089157	RPLP0	0.106412	ENSG00000183172	SMDT1	0.372172	ENSG00000118363	AC020656.204	0.33416	ENSG00000161970	RPL26	0.0771298	ENSG00000232112	TMA7	0.0839539				ENSG00000019582	CD74	0.421881	ENSG00000198840	MT-ND3	0.1678	ENSG00000105887	MTPN	0.124199	ENSG00000189043	NDUFA4	0.280829	ENSG00000140105	WARS	0.275888	ENSG00000113580	NR3C1	0.392825	ENSG00000119138	KLF9	0.669583	ENSG00000120594	PLXDC2	0.430274	ENSG00000102007	PLP2	1.27284	ENSG00000163682	RPL9	1.01648	ENSG00000158716	DUSP23
ENSG00000232112	TMA7	0.105066	ENSG00000089280	FUS	0.370378	ENSG00000204642	AC020656.205	0.330378	ENSG00000109332	UBE2D3	0.0763698	ENSG00000152795	HNRNPDL	0.0838831				ENSG00000068831	RASGRP2	0.414488	ENSG00000185043	CIB1	0.163225	ENSG00000008988	RPS20	0.121768	ENSG00000183172	SMDT1	0.277177	ENSG00000135018	UBQLN1	0.275815	ENSG00000169020	ATP5ME	0.392668	ENSG00000150977	RILPL2	0.669048	ENSG00000196924	FLNA	0.429163	ENSG00000197081	IGF2R	1.27284	ENSG00000170889	RPS9	1.00645	ENSG00000181817	LSM10
ENSG00000161970	RPL26	0.104799	ENSG00000213719	CLIC1	0.367897	ENSG00000087074	AC020656.206	0.330378	ENSG00000113387	SUB1	0.0758191	ENSG00000114902	SPCS1	0.0796676				ENSG00000005483	KMT2E	0.414488	ENSG00000125835	SNRPB	0.161819	ENSG00000135940	COX5B	0.120783	ENSG00000090266	NDUFB2	0.275354	ENSG00000156052	GNAQ	0.275462	ENSG00000174718	KIAA1551	0.391818	ENSG00000160410	SHKBP1	0.667605	ENSG00000139921	TMX1	0.429081	ENSG00000112679	DUSP22	1.27284	ENSG00000090013	BLVRB	1.00021	ENSG00000122034	GTF3A
ENSG00000063177	RPL18	0.103223	ENSG00000103187	COTL1	0.367622	ENSG00000182196	AC020656.207	0.326864	ENSG00000142676	RPL11	0.075757	ENSG00000198840	MT-ND3	0.0791563				ENSG00000205352	PRR13	0.412532	ENSG00000198899	MT-ATP6	0.161656	ENSG00000198258	UBL5	0.119826	ENSG00000087460	GNAS	0.271971	ENSG00000145416	2021-03-01	0.274633	ENSG00000174886	NDUFA11	0.389737	ENSG00000112851	ERBIN	0.662067	ENSG00000136051	WASHC4	0.429081	ENSG00000165671	NSD1	1.27284	ENSG00000130811	EIF3G	1.00021	ENSG00000044574	HSPA5
ENSG00000221983	UBA52	0.101368	ENSG00000189403	HMGB1	0.366283	ENSG00000100911	AC020656.208	0.326587	ENSG00000104529	EEF1D	0.0754579	ENSG00000092841	MYL6	0.0786881				ENSG00000204287	HLA-DRA	0.410094	ENSG00000124795	DEK	0.161375	ENSG00000257764	AC020656.1	0.117621	ENSG00000026508	CD44	0.270553	ENSG00000228253	MT-ATP8	0.274318	ENSG00000163349	HIPK1	0.389442	ENSG00000106829	TLE4	0.661656	ENSG00000160712	IL6R	0.429081	ENSG00000164615	CAMLG	1.27284	ENSG00000111775	COX6A1	1.00021	ENSG00000100354	TNRC6B
ENSG00000156411	ATP5MPL	0.101101	ENSG00000111832	RWDD1	0.362785	ENSG00000113732	AC020656.209	0.319151	ENSG00000205542	TMSB4X	0.0733647	ENSG00000206503	HLA-A	0.0785654				ENSG00000131508	UBE2D2	0.403761	ENSG00000135046	ANXA1	0.15976	ENSG00000171858	RPS21	0.115899	ENSG00000189403	HMGB1	0.269854	ENSG00000158050	DUSP2	0.273827	ENSG00000166523	CLEC4E	0.38925	ENSG00000105374	NKG7	0.659951	ENSG00000125304	TM9SF2	0.428024	ENSG00000153147	SMARCA5	1.27284	ENSG00000102007	PLP2	1.00021	ENSG00000163563	MNDA
ENSG00000100316	RPL3	0.0956003	ENSG00000143543	JTB	0.362126	ENSG00000123505	AC020656.210	0.317995	ENSG00000125835	SNRPB	0.0731578	ENSG00000137818	RPLP1	0.0762787				ENSG00000171222	SCAND1	0.393114	ENSG00000069275	NUCKS1	0.158236	ENSG00000241343	RPL36A	0.11548	ENSG00000198712	MT-CO2	0.269409	ENSG00000173915	ATP5MD	0.272177	ENSG00000047410	TPR	0.388172	ENSG00000198763	MT-ND2	0.656311	ENSG00000110395	CBL	0.427011	ENSG00000163902	RPN1	1.27284	ENSG00000109743	BST1	1.00021	ENSG00000082074	FYB1
ENSG00000205542	TMSB4X	0.0955232	ENSG00000117592	PRDX6	0.356817	ENSG00000163041	AC020656.211	0.310516	ENSG00000008018	PSMB1	0.0717023	ENSG00000174444	RPL4	0.0749932				ENSG00000231389	HLA-DPA1	0.38904	ENSG00000129128	SPCS3	0.15702	ENSG00000157514	TSC22D3	0.11527	ENSG00000092010	PSME1	0.269355	ENSG00000115760	BIRC6	0.271836	ENSG00000136026	CKAP4	0.386465	ENSG00000185825	BCAP31	0.649683	ENSG00000167460	TPM4	0.425992	ENSG00000066422	ZBTB11	1.27284	ENSG00000167526	RPL13	0.995299	ENSG00000152229	PSTPIP2
ENSG00000099624	ATP5F1D	0.0945579	ENSG00000101182	PSMA7	0.35319	ENSG00000120742	AC020656.212	0.309914	ENSG00000172428	COPS9	0.0705466	ENSG00000089157	RPLP0	0.0734513				ENSG00000101160	CTSZ	0.384653	ENSG00000106803	SEC61B	0.154609	ENSG00000142534	RPS11	0.110267	ENSG00000120616	EPC1	0.267086	ENSG00000118564	FBXL5	0.267684	ENSG00000067334	DNTTIP2	0.384575	ENSG00000090863	GLG1	0.649683	ENSG00000135363	LMO2	0.424738	ENSG00000173473	SMARCC1	1.27284	ENSG00000233927	RPS28	0.980189	ENSG00000257621	PSMA3-AS1
ENSG00000167863	ATP5PD	0.0945579	ENSG00000180353	HCLS1	0.350634	ENSG00000172757	AC020656.213	0.30806	ENSG00000182899	RPL35A	0.0690833	ENSG00000185043	CIB1	0.0733746				ENSG00000167863	ATP5PD	0.379915	ENSG00000129562	DAD1	0.153958	ENSG00000174444	RPL4	0.110064	ENSG00000197747	S100A10	0.266177	ENSG00000179388	EGR3	0.26741	ENSG00000122034	GTF3A	0.382275	ENSG00000166797	FAM96A	0.649683	ENSG00000116679	IVNS1ABP	0.42393	ENSG00000163788	SNRK	1.27284	ENSG00000028137	TNFRSF1B	0.977131	ENSG00000197353	LYPD2
ENSG00000188186	LAMTOR4	0.0945579	ENSG00000124831	LRRFIP1	0.349987	ENSG00000100387	AC020656.214	0.30773	ENSG00000150991	UBC	0.0688848	ENSG00000131469	RPL27	0.0733206				ENSG00000147274	RBMX	0.379915	ENSG00000182196	ARL6IP4	0.153593	ENSG00000172531	PPP1CA	0.109436	ENSG00000077549	CAPZB	0.265691	ENSG00000165025	SYK	0.266452	ENSG00000204642	HLA-F	0.381802	ENSG00000133321	RARRES3	0.649683	ENSG00000173221	GLRX	0.42367	ENSG00000163513	TGFBR2	1.27284	ENSG00000182899	RPL35A	0.973078	ENSG00000112531	QKI
ENSG00000265681	RPL17	0.0945579	ENSG00000026508	CD44	0.34786	ENSG00000176340	AC020656.215	0.306304	ENSG00000081237	PTPRC	0.0685745	ENSG00000130255	RPL36	0.0729718				ENSG00000173436	MINOS1	0.379915	ENSG00000164483	SAMD3	0.153463	ENSG00000265972	TXNIP	0.10736	ENSG00000010810	FYN	0.263381	ENSG00000120992	LYPLA1	0.264135	ENSG00000124783	SSR1	0.381153	ENSG00000135387	CAPRIN1	0.649683	ENSG00000137106	GRHPR	0.422538	ENSG00000159399	HK2	1.27284	ENSG00000212907	MT-ND4L	0.970467	ENSG00000169564	PCBP1
ENSG00000156976	EIF4A2	0.0945579	ENSG00000145779	TNFAIP8	0.344487	ENSG00000120616	AC020656.216	0.304044	ENSG00000122545	2021-09-07	0.0685086	ENSG00000100906	NFKBIA	0.0724288				ENSG00000100941	PNN	0.377766	ENSG00000089737	DDX24	0.152943	ENSG00000205542	TMSB4X	0.107197	ENSG00000124795	DEK	0.263381	ENSG00000135535	CD164	0.263914	ENSG00000156052	GNAQ	0.380755	ENSG00000093144	ECHDC1	0.649683	ENSG00000104131	EIF3J	0.422017	ENSG00000143924	EML4	1.27284	ENSG00000156508	EEF1A1	0.970313	ENSG00000073756	PTGS2
ENSG00000109475	RPL34	0.0920141	ENSG00000160213	CSTB	0.344038	ENSG00000129968	AC020656.217	0.302747	ENSG00000178982	EIF3K	0.068382	ENSG00000110958	PTGES3	0.0720612				ENSG00000212907	MT-ND4L	0.375447	ENSG00000198258	UBL5	0.15069	ENSG00000142227	EMP3	0.103407	ENSG00000162191	UBXN1	0.262415	ENSG00000154518	ATP5MC3	0.263297	ENSG00000101745	ANKRD12	0.379866	ENSG00000114331	ACAP2	0.649683	ENSG00000185022	MAFF	0.42191	ENSG00000103994	ZNF106	1.27284	ENSG00000137154	RPS6	0.968963	ENSG00000185624	P4HB
ENSG00000135390	ATP5MC2	0.0913906	ENSG00000081237	PTPRC	0.343982	ENSG00000159388	AC020656.218	0.300559	ENSG00000166710	B2M	0.066668	ENSG00000169100	SLC25A6	0.0699007				ENSG00000174021	GNG5	0.365793	ENSG00000205542	TMSB4X	0.150357	ENSG00000070831	CDC42	0.102896	ENSG00000211450	SELENOH	0.261548	ENSG00000174780	SRP72	0.262276	ENSG00000136867	SLC31A2	0.378693	ENSG00000081154	PCNP	0.649683	ENSG00000165030	NFIL3	0.421745	ENSG00000129534	MIS18BP1	1.27284	ENSG00000134046	MBD2	0.965449	ENSG00000156256	USP16
ENSG00000162244	RPL29	0.0890409	ENSG00000153187	HNRNPU	0.343755	ENSG00000173915	AC020656.219	0.300384	ENSG00000184076	UQCR10	0.0652292	ENSG00000142676	RPL11	0.0698749				ENSG00000057608	GDI2	0.356456	ENSG00000156411	ATP5MPL	0.147179	ENSG00000204264	PSMB8	0.102228	ENSG00000184007	PTP4A2	0.257102	ENSG00000117523	PRRC2C	0.262006	ENSG00000143612	C1orf43	0.378438	ENSG00000077097	TOP2B	0.649683	ENSG00000109046	WSB1	0.421464	ENSG00000011422	PLAUR	1.25897	ENSG00000169508	GPR183	0.965449	ENSG00000174917	C19orf70
ENSG00000130332	LSM7	0.0860464	ENSG00000173575	CHD2	0.342512	ENSG00000197540	AC020656.220	0.294914	ENSG00000213145	CRIP1	0.0646606	ENSG00000075415	SLC25A3	0.067474				ENSG00000074800	ENO1	0.356456	ENSG00000212907	MT-ND4L	0.146612	ENSG00000173726	TOMM20	0.102064	ENSG00000133321	RARRES3	0.252986	ENSG00000104093	DMXL2	0.261689	ENSG00000241343	RPL36A	0.378138	ENSG00000138385	SSB	0.649683	ENSG00000173442	EHBP1L1	0.419916	ENSG00000125753	VASP	1.25252	ENSG00000165030	NFIL3	0.965449	ENSG00000073921	PICALM
ENSG00000129562	DAD1	0.0845042	ENSG00000180879	SSR4	0.338719	ENSG00000130770	AC020656.221	0.292904	ENSG00000198918	RPL39	0.0642591	ENSG00000213741	RPS29	0.066234				ENSG00000183648	NDUFB1	0.35288	ENSG00000198804	MT-CO1	0.143587	ENSG00000065978	YBX1	0.101307	ENSG00000089248	ERP29	0.250194	ENSG00000160551	TAOK1	0.259551	ENSG00000106780	MEGF9	0.37744	ENSG00000127481	UBR4	0.649683	ENSG00000015285	WAS	0.414988	ENSG00000130724	CHMP2A	1.24637	ENSG00000231389	HLA-DPA1	0.965449	ENSG00000112773	TENT5A
ENSG00000233927	RPS28	0.082766	ENSG00000096060	FKBP5	0.336425	ENSG00000128016	AC020656.222	0.29124	ENSG00000142541	RPL13A	0.0619276	ENSG00000136758	YME1L1	0.06513				ENSG00000132963	POMP	0.351294	ENSG00000168298	HIST1H1E	0.142477	ENSG00000102317	RBM3	0.0981926	ENSG00000269028	MTRNR2L12	0.249576	ENSG00000118689	FOXO3	0.258573	ENSG00000105323	HNRNPUL1	0.37632	ENSG00000182718	ANXA2	0.642378	ENSG00000044574	HSPA5	0.414949	ENSG00000168172	HOOK3	1.24637	ENSG00000213741	RPS29	0.95536	ENSG00000090382	LYZ
ENSG00000139193	CD27	0.0807521	ENSG00000117091	CD48	0.327712	ENSG00000113811	AC020656.223	0.291065	ENSG00000143933	CALM2	0.0616558	ENSG00000162511	LAPTM5	0.06462				ENSG00000111229	ARPC3	0.347178	ENSG00000091527	CDV3	0.141164	ENSG00000166598	HSP90B1	0.0979346	ENSG00000198938	MT-CO3	0.24783	ENSG00000125107	CNOT1	0.258394	ENSG00000146247	PHIP	0.375642	ENSG00000106066	CPVL	0.639341	ENSG00000071127	WDR1	0.413139	ENSG00000130414	NDUFA10	1.24637	ENSG00000109475	RPL34	0.951851	ENSG00000140350	ANP32A
ENSG00000156467	UQCRB	0.0793314	ENSG00000080824	HSP90AA1	0.32286	ENSG00000103363	AC020656.224	0.28815	ENSG00000198258	UBL5	0.0612669	ENSG00000071082	RPL31	0.0603004				ENSG00000141002	TCF25	0.347178	ENSG00000204256	BRD2	0.140205	ENSG00000254087	LYN	0.0978627	ENSG00000185885	IFITM1	0.245607	ENSG00000049618	ARID1B	0.258191	ENSG00000125538	IL1B	0.375027	ENSG00000188313	PLSCR1	0.637192	ENSG00000177556	ATOX1	0.412196	ENSG00000117151	CTBS	1.24637	ENSG00000229117	RPL41	0.94923	ENSG00000101367	MAPRE1
ENSG00000165502	RPL36AL	0.0766041	ENSG00000197622	CDC42SE1	0.322521	ENSG00000116754	AC020656.225	0.287734	ENSG00000164919	COX6C	0.0610424	ENSG00000146066	HIGD2A	0.0600146				ENSG00000111786	SRSF9	0.347178	ENSG00000198886	MT-ND4	0.13855	ENSG00000150991	UBC	0.0969943	ENSG00000265972	TXNIP	0.244779	ENSG00000198625	MDM4	0.255591	ENSG00000005810	MYCBP2	0.373536	ENSG00000104824	HNRNPL	0.636262	ENSG00000243449	C4orf48	0.411745	ENSG00000160075	SSU72	1.24637	ENSG00000139644	TMBIM6	0.947747	ENSG00000109920	FNBP4
ENSG00000099783	HNRNPM	0.0761794	ENSG00000127922	SEM1	0.321318	ENSG00000147677	AC020656.226	0.28331	ENSG00000185088	RPS27L	0.060864	ENSG00000008952	SEC62	0.0599693				ENSG00000129559	NEDD8	0.343819	ENSG00000184007	PTP4A2	0.138404	ENSG00000153187	HNRNPU	0.0965818	ENSG00000140264	SERF2	0.242933	ENSG00000158062	UBXN11	0.255275	ENSG00000221869	CEBPD	0.373343	ENSG00000100796	PPP4R3A	0.635183	ENSG00000148803	FUOM	0.411597	ENSG00000129003	VPS13C	1.23487	ENSG00000121316	PLBD1	0.947747	ENSG00000147140	NONO
ENSG00000112306	RPS12	0.0761794	ENSG00000013441	CLK1	0.32074	ENSG00000115053	AC020656.227	0.280363	ENSG00000070831	CDC42	0.0593018	ENSG00000109971	HSPA8	0.0589303				ENSG00000163479	SSR2	0.343819	ENSG00000153310	FAM49B	0.135141	ENSG00000123416	TUBA1B	0.0961913	ENSG00000100664	EIF5	0.240047	ENSG00000148908	RGS10	0.254369	ENSG00000120594	PLXDC2	0.373118	ENSG00000054118	THRAP3	0.633195	ENSG00000106546	AHR	0.411415	ENSG00000110934	BIN2	1.23487	ENSG00000131469	RPL27	0.941797	ENSG00000070190	DAPP1
ENSG00000134884	ARGLU1	0.0751055	ENSG00000166794	PPIB	0.319737	ENSG00000164032	AC020656.228	0.278848	ENSG00000234745	HLA-B	0.0568001	ENSG00000149806	FAU	0.0586201				ENSG00000130770	ATP5IF1	0.341026	ENSG00000140264	SERF2	0.134589	ENSG00000005022	SLC25A5	0.0951932	ENSG00000110321	EIF4G2	0.23973	ENSG00000084070	SMAP2	0.254092	ENSG00000005020	SKAP2	0.373118	ENSG00000002549	LAP3	0.632809	ENSG00000103381	CPPED1	0.410005	ENSG00000197629	MPEG1	1.23126	ENSG00000204592	HLA-E	0.937818	ENSG00000138760	SCARB2
ENSG00000152601	MBNL1	0.0745201	ENSG00000234745	HLA-B	0.319205	ENSG00000110934	AC020656.229	0.278848	ENSG00000255823	MTRNR2L8	0.0561375	ENSG00000162244	RPL29	0.0571786				ENSG00000104904	OAZ1	0.340468	ENSG00000177700	POLR2L	0.132016	ENSG00000109861	CTSC	0.0936348	ENSG00000185650	ZFP36L1	0.238517	ENSG00000076662	ICAM3	0.253008	ENSG00000162521	RBBP4	0.368978	ENSG00000270647	TAF15	0.630574	ENSG00000204252	HLA-DOA	0.408199	ENSG00000271614	ATP2B1-AS1	1.2194	ENSG00000132530	XAF1	0.929825	ENSG00000114439	BBX
ENSG00000105640	RPL18A	0.0720856	ENSG00000171634	BPTF	0.317566	ENSG00000069493	AC020656.230	0.277911	ENSG00000198886	MT-ND4	0.0560942	ENSG00000198786	MT-ND5	0.0567639				ENSG00000198899	MT-ATP6	0.333704	ENSG00000185885	IFITM1	0.13058	ENSG00000153234	NR4A2	0.093266	ENSG00000111913	RIPOR2	0.237702	ENSG00000215021	PHB2	0.252845	ENSG00000136758	YME1L1	0.368978	ENSG00000163694	RBM47	0.630574	ENSG00000147872	PLIN2	0.40719	ENSG00000105835	NAMPT	1.2155	ENSG00000198931	APRT	0.929825	ENSG00000156171	DRAM2
ENSG00000105373	NOP53	0.0698575	ENSG00000099977	DDT	0.312199	ENSG00000100201	AC020656.231	0.276939	ENSG00000101608	MYL12A	0.0557665	ENSG00000177600	RPLP2	0.0558812				ENSG00000135655	USP15	0.333372	ENSG00000003402	CFLAR	0.130381	ENSG00000135390	ATP5MC2	0.0914335	ENSG00000170315	UBB	0.236973	ENSG00000198624	CCDC69	0.252217	ENSG00000214212	C19orf38	0.368978	ENSG00000064393	HIPK2	0.623688	ENSG00000103769	RAB11A	0.404965	ENSG00000158517	NCF1	1.20572	ENSG00000217555	CKLF	0.929825	ENSG00000130775	THEMIS2
ENSG00000198258	UBL5	0.068374	ENSG00000185043	CIB1	0.308288	ENSG00000152601	AC020656.232	0.273045	ENSG00000163463	KRTCAP2	0.0548597	ENSG00000118181	RPS25	0.0557248				ENSG00000167258	CDK12	0.32714	ENSG00000026025	VIM	0.130305	ENSG00000105329	TGFB1	0.0898568	ENSG00000122862	SRGN	0.2348	ENSG00000156030	ELMSAN1	0.251856	ENSG00000096968	JAK2	0.368978	ENSG00000149311	ATM	0.619309	ENSG00000166888	STAT6	0.404965	ENSG00000114738	MAPKAPK3	1.20572	ENSG00000167978	SRRM2	0.929825	ENSG00000103642	LACTB
ENSG00000131143	COX4I1	0.0661993	ENSG00000169714	CNBP	0.30706	ENSG00000164104	AC020656.233	0.272928	ENSG00000115935	WIPF1	0.0539446	ENSG00000198727	MT-CYB	0.0553902				ENSG00000169976	SF3B5	0.325759	ENSG00000142227	EMP3	0.128637	ENSG00000115956	PLEK	0.0878999	ENSG00000125356	NDUFA1	0.234408	ENSG00000059377	TBXAS1	0.251756	ENSG00000150681	RGS18	0.368978	ENSG00000010810	FYN	0.619309	ENSG00000166012	TAF1D	0.403086	ENSG00000162645	GBP2	1.20572	ENSG00000183283	DAZAP2	0.929825	ENSG00000089737	DDX24
ENSG00000163660	CCNL1	0.0611717	ENSG00000100138	SNU13	0.305837	ENSG00000009307	AC020656.234	0.272928	ENSG00000075415	SLC25A3	0.0531284	ENSG00000105640	RPL18A	0.0541074				ENSG00000008952	SEC62	0.322725	ENSG00000136950	ARPC5L	0.128147	ENSG00000132963	POMP	0.0871573	ENSG00000082074	FYB1	0.234408	ENSG00000109133	TMEM33	0.25155	ENSG00000090060	PAPOLA	0.36396	ENSG00000068305	MEF2A	0.616516	ENSG00000196396	PTPN1	0.403086	ENSG00000177663	IL17RA	1.20572	ENSG00000137642	SORL1	0.929825	ENSG00000110057	UNC93B1
ENSG00000147403	RPL10	0.0610448	ENSG00000197971	MBP	0.305837	ENSG00000070831	AC020656.235	0.272065	ENSG00000166136	NDUFB8	0.0529129	ENSG00000213654	GPSM3	0.0533086				ENSG00000124172	ATP5F1E	0.3128	ENSG00000008018	PSMB1	0.122948	ENSG00000166710	B2M	0.0861853	ENSG00000119801	YPEL5	0.233988	ENSG00000007237	GAS7	0.250833	ENSG00000147416	ATP6V1B2	0.363503	ENSG00000164308	ERAP2	0.616516	ENSG00000012779	ALOX5	0.403086	ENSG00000197766	CFD	1.20572	ENSG00000164919	COX6C	0.929825	ENSG00000147813	NAPRT
ENSG00000111716	LDHB	0.0600945	ENSG00000126524	SBDS	0.304669	ENSG00000054654	AC020656.236	0.271243	ENSG00000135046	ANXA1	0.0511812	ENSG00000188243	COMMD6	0.0530288				ENSG00000088986	DYNLL1	0.310652	ENSG00000159388	BTG2	0.122182	ENSG00000044574	HSPA5	0.0830328	ENSG00000167004	PDIA3	0.232783	ENSG00000159377	PSMB4	0.249256	ENSG00000153914	SREK1	0.362405	ENSG00000151247	EIF4E	0.611209	ENSG00000187608	ISG15	0.401892	ENSG00000177731	FLII	1.20572	ENSG00000156467	UQCRB	0.929825	ENSG00000225921	NOL7
ENSG00000120616	EPC1	0.058032	ENSG00000189067	LITAF	0.300007	ENSG00000198821	AC020656.237	0.270735	ENSG00000197111	PCBP2	0.0497535	ENSG00000164346	NSA2	0.0523184				ENSG00000163584	RPL22L1	0.310652	ENSG00000117091	CD48	0.120811	ENSG00000187109	NAP1L1	0.0805053	ENSG00000150459	SAP18	0.232511	ENSG00000138279	ANXA7	0.248784	ENSG00000143110	C1orf162	0.362221	ENSG00000145912	NHP2	0.609041	ENSG00000077549	CAPZB	0.401644	ENSG00000122257	RBBP6	1.20572	ENSG00000135604	STX11	0.929825	ENSG00000115271	GCA
ENSG00000164096	C4orf3	0.058032	ENSG00000204642	HLA-F	0.294846	ENSG00000185088	AC020656.238	0.270672	ENSG00000156976	EIF4A2	0.0494291	ENSG00000067560	RHOA	0.0512607				ENSG00000070961	ATP2B1	0.310652	ENSG00000122034	GTF3A	0.120467	ENSG00000135046	ANXA1	0.0789578	ENSG00000163463	KRTCAP2	0.231932	ENSG00000012779	ALOX5	0.247118	ENSG00000170542	SERPINB9	0.360941	ENSG00000112308	C6orf62	0.607863	ENSG00000145703	IQGAP2	0.40099	ENSG00000185950	IRS2	1.20572	ENSG00000169554	ZEB2	0.929825	ENSG00000115350	POLE4
ENSG00000145592	RPL37	0.0556559	ENSG00000172757	CFL1	0.292031	ENSG00000109332	AC020656.239	0.270636	ENSG00000167283	ATP5MG	0.0493237	ENSG00000169564	PCBP1	0.0504004				ENSG00000115165	CYTIP	0.310652	ENSG00000152795	HNRNPDL	0.119113	ENSG00000113732	ATP6V0E1	0.0763714	ENSG00000174886	NDUFA11	0.229839	ENSG00000138185	ENTPD1	0.24669	ENSG00000177156	TALDO1	0.35925	ENSG00000153914	SREK1	0.607863	ENSG00000117362	APH1A	0.399254	ENSG00000180776	ZDHHC20	1.20572	ENSG00000116288	PARK7	0.929825	ENSG00000180353	HCLS1
ENSG00000115268	RPS15	0.0525465	ENSG00000166012	TAF1D	0.288847	ENSG00000152795	AC020656.240	0.269886	ENSG00000071082	RPL31	0.0484441	ENSG00000175390	EIF3F	0.050072				ENSG00000177410	ZFAS1	0.310652	ENSG00000172115	CYCS	0.117654	ENSG00000164032	H2AFZ	0.0747991	ENSG00000188243	COMMD6	0.226212	ENSG00000106066	CPVL	0.245932	ENSG00000185950	IRS2	0.359197	ENSG00000012779	ALOX5	0.607455	ENSG00000159199	ATP5MC1	0.398493	ENSG00000213203	GIMAP1	1.20572	ENSG00000148303	RPL7A	0.921313	ENSG00000143384	MCL1
ENSG00000112514	CUTA	0.0508365	ENSG00000115524	SF3B1	0.285168	ENSG00000100345	AC020656.241	0.269575	ENSG00000065978	YBX1	0.0478452	ENSG00000135940	COX5B	0.049762				ENSG00000167468	GPX4	0.295702	ENSG00000112081	SRSF3	0.11517	ENSG00000102144	PGK1	0.0739954	ENSG00000130811	EIF3G	0.222887	ENSG00000136869	TLR4	0.245676	ENSG00000170275	CRTAP	0.359197	ENSG00000168461	RAB31	0.606614	ENSG00000198399	ITSN2	0.396543	ENSG00000152061	RABGAP1L	1.20572	ENSG00000063177	RPL18	0.915325	ENSG00000099977	DDT
ENSG00000204525	HLA-C	0.0488349	ENSG00000127528	KLF2	0.284229	ENSG00000174718	AC020656.242	0.267982	ENSG00000131143	COX4I1	0.0461963	ENSG00000100664	EIF5	0.0454477				ENSG00000173915	ATP5MD	0.29273	ENSG00000269893	SNHG8	0.113671	ENSG00000125691	RPL23	0.0737947	ENSG00000102317	RBM3	0.221084	ENSG00000181467	RAP2B	0.244629	ENSG00000119900	OGFRL1	0.359063	ENSG00000179119	SPTY2D1	0.606614	ENSG00000127603	MACF1	0.396219	ENSG00000090013	BLVRB	1.17598	ENSG00000142676	RPL11	0.909787	ENSG00000123505	AMD1
ENSG00000228474	OST4	0.0456483	ENSG00000126777	KTN1	0.28335	ENSG00000116824	AC020656.243	0.266555	ENSG00000170776	AKAP13	0.0457461	ENSG00000127184	COX7C	0.0435406				ENSG00000197746	PSAP	0.29273	ENSG00000054654	SYNE2	0.112336	ENSG00000172428	COPS9	0.0733607	ENSG00000185088	RPS27L	0.220072	ENSG00000111897	SERINC1	0.24384	ENSG00000143546	S100A8	0.358924	ENSG00000007237	GAS7	0.60574	ENSG00000103495	MAZ	0.395985	ENSG00000112576	CCND3	1.17598	ENSG00000108518	PFN1	0.90802	ENSG00000158050	DUSP2
ENSG00000130255	RPL36	0.0440928	ENSG00000047410	TPR	0.283102	ENSG00000240065	AC020656.244	0.264984	ENSG00000174444	RPL4	0.0435742	ENSG00000168653	NDUFS5	0.0433483				ENSG00000114902	SPCS1	0.290752	ENSG00000163041	H3F3A	0.112161	ENSG00000240065	PSMB9	0.0717938	ENSG00000134884	ARGLU1	0.21646	ENSG00000173559	NABP1	0.243353	ENSG00000048828	FAM120A	0.358007	ENSG00000081320	STK17B	0.603879	ENSG00000171867	PRNP	0.394524	ENSG00000184922	FMNL1	1.1639	ENSG00000103490	PYCARD	0.905577	ENSG00000165312	OTUD1
ENSG00000065518	NDUFB4	0.0401101	ENSG00000147274	RBMX	0.282873	ENSG00000139218	AC020656.245	0.256378	ENSG00000130255	RPL36	0.0433707	ENSG00000167283	ATP5MG	0.0428494				ENSG00000196924	FLNA	0.288284	ENSG00000105329	TGFB1	0.109722	ENSG00000154723	ATP5PF	0.0712139	ENSG00000101608	MYL12A	0.215436	ENSG00000154589	LY96	0.242741	ENSG00000141552	ANAPC11	0.355557	ENSG00000198887	SMC5	0.603879	ENSG00000197345	MRPL21	0.393318	ENSG00000165097	KDM1B	1.1639	ENSG00000174444	RPL4	0.905577	ENSG00000213639	PPP1CB
ENSG00000114391	RPL24	0.0379744	ENSG00000087086	FTL	0.282399	ENSG00000134480	AC020656.246	0.254429	ENSG00000174748	RPL15	0.0427264	ENSG00000130522	JUND	0.042359				ENSG00000214253	FIS1	0.288284	ENSG00000143774	GUK1	0.108649	ENSG00000129559	NEDD8	0.070845	ENSG00000129355	CDKN2D	0.214243	ENSG00000006459	KDM7A	0.241169	ENSG00000142089	IFITM3	0.354883	ENSG00000082996	RNF13	0.602377	ENSG00000217128	FNIP1	0.391717	ENSG00000117500	TMED5	1.1639	ENSG00000118816	CCNI	0.905577	ENSG00000100664	EIF5
ENSG00000105193	RPS16	0.0340993	ENSG00000147649	MTDH	0.282277	ENSG00000102317	AC020656.247	0.254075	ENSG00000173660	UQCRH	0.041673	ENSG00000096384	HSP90AB1	0.0419853				ENSG00000038219	BOD1L1	0.288284	ENSG00000110696	C11orf58	0.107769	ENSG00000231925	TAPBP	0.068872	ENSG00000124172	ATP5F1E	0.213185	ENSG00000103381	CPPED1	0.240911	ENSG00000172115	CYCS	0.35467	ENSG00000158985	CDC42SE2	0.599642	ENSG00000100030	MAPK1	0.390702	ENSG00000153113	CAST	1.15326	ENSG00000131238	PPT1	0.905577	ENSG00000157514	TSC22D3
ENSG00000107223	EDF1	0.0316979	ENSG00000136758	YME1L1	0.276924	ENSG00000198830	AC020656.248	0.241373	ENSG00000198668	CALM1	0.0397573	ENSG00000113732	ATP6V0E1	0.0408264				ENSG00000115758	ODC1	0.288284	ENSG00000081320	STK17B	0.105646	ENSG00000120742	SERP1	0.0624278	ENSG00000173113	TRMT112	0.209687	ENSG00000008294	SPAG9	0.24075	ENSG00000008294	SPAG9	0.354181	ENSG00000002586	CD99	0.597216	ENSG00000187840	EIF4EBP1	0.390702	ENSG00000139644	TMBIM6	1.15044	ENSG00000161547	SRSF2	0.893299	ENSG00000100034	PPM1F
ENSG00000189043	NDUFA4	0.0294629	ENSG00000173272	MZT2A	0.276924	ENSG00000184009	AC020656.249	0.240795	ENSG00000171863	RPS7	0.0389208	ENSG00000166441	RPL27A	0.039828				ENSG00000117091	CD48	0.287319	ENSG00000154723	ATP5PF	0.104455	ENSG00000189043	NDUFA4	0.0617679	ENSG00000115875	SRSF7	0.209687	ENSG00000152234	ATP5F1A	0.240638	ENSG00000115355	CCDC88A	0.354028	ENSG00000278311	GGNBP2	0.597216	ENSG00000073614	KDM5A	0.390702	ENSG00000105402	NAPA	1.13533	ENSG00000132510	KDM6B	0.893299	ENSG00000133246	PRAM1
ENSG00000173812	EIF1	0.0291993	ENSG00000129128	SPCS3	0.27026	ENSG00000131051	AC020656.250	0.240781	ENSG00000086061	DNAJA1	0.038107	ENSG00000152518	ZFP36L2	0.0355608				ENSG00000198763	MT-ND2	0.27823	ENSG00000143933	CALM2	0.103059	ENSG00000124172	ATP5F1E	0.0616418	ENSG00000110651	CD81	0.204965	ENSG00000136238	RAC1	0.240123	ENSG00000106066	CPVL	0.353482	ENSG00000126860	EVI2A	0.594541	ENSG00000155307	SAMSN1	0.388537	ENSG00000171940	ZNF217	1.13533	ENSG00000111144	LTA4H	0.893299	ENSG00000184207	PGP
ENSG00000104529	EEF1D	0.0283612	ENSG00000130332	LSM7	0.265519	ENSG00000160932	AC020656.251	0.24018	ENSG00000196405	EVL	0.0376691	ENSG00000215301	DDX3X	0.0351897				ENSG00000198888	MT-ND1	0.277229	ENSG00000130811	EIF3G	0.102766	ENSG00000115091	ACTR3	0.0594686	ENSG00000172757	CFL1	0.199894	ENSG00000137776	SLTM	0.240052	ENSG00000143106	PSMA5	0.352858	ENSG00000141867	BRD4	0.59158	ENSG00000141401	IMPA2	0.387773	ENSG00000108599	AKAP10	1.13533	ENSG00000139112	GABARAPL1	0.893299	ENSG00000140332	TLE3
ENSG00000089248	ERP29	0.0268133	ENSG00000152601	MBNL1	0.265185	ENSG00000189403	AC020656.252	0.239811	ENSG00000074800	ENO1	0.0373573	ENSG00000162191	UBXN1	0.0327812				ENSG00000147123	NDUFB11	0.275028	ENSG00000137876	RSL24D1	0.101872	ENSG00000143119	CD53	0.0589315	ENSG00000176340	COX8A	0.199803	ENSG00000170776	AKAP13	0.237275	ENSG00000137462	TLR2	0.350521	ENSG00000069974	RAB27A	0.59158	ENSG00000163683	SMIM14	0.387144	ENSG00000159720	ATP6V0D1	1.13533	ENSG00000107223	EDF1	0.893299	ENSG00000184863	RBM33
ENSG00000136527	TRA2B	0.0244795	ENSG00000204569	PPP1R10	0.263627	ENSG00000155957	AC020656.253	0.236664	ENSG00000122862	SRGN	0.0371427	ENSG00000034510	TMSB10	0.0323627				ENSG00000241468	ATP5MF	0.275028	ENSG00000120727	PAIP2	0.101872	ENSG00000167004	PDIA3	0.0575971	ENSG00000164543	STK17A	0.198812	ENSG00000183696	UPP1	0.236409	ENSG00000198160	MIER1	0.350362	ENSG00000103035	PSMD7	0.588282	ENSG00000165168	CYBB	0.386342	ENSG00000135720	DYNC1LI2	1.13533	ENSG00000164733	CTSB	0.893299	ENSG00000162511	LAPTM5
ENSG00000137818	RPLP1	0.0142275	ENSG00000134954	ETS1	0.262849	ENSG00000104894	AC020656.254	0.234376	ENSG00000104894	CD37	0.036975	ENSG00000172809	RPL38	0.0319108				ENSG00000147677	EIF3H	0.262289	ENSG00000118503	TNFAIP3	0.100809	ENSG00000198821	CD247	0.0568343	ENSG00000255302	EID1	0.197352	ENSG00000197601	FAR1	0.235961	ENSG00000122218	COPA	0.349869	ENSG00000148229	POLE3	0.588282	ENSG00000189266	PNRC2	0.385789	ENSG00000139496	NUP58	1.13533	ENSG00000198898	CAPZA2	0.893299	ENSG00000137642	SORL1
ENSG00000213741	RPS29	0.0121128	ENSG00000183283	DAZAP2	0.251501	ENSG00000139644	AC020656.255	0.225681	ENSG00000198821	CD247	0.0367453	ENSG00000128016	ZFP36	0.0305217				ENSG00000173660	UQCRH	0.254384	ENSG00000170144	HNRNPA3	0.0991082	ENSG00000127184	COX7C	0.0562362	ENSG00000165502	RPL36AL	0.197229	ENSG00000110446	SLC15A3	0.235703	ENSG00000105193	RPS16	0.349803	ENSG00000198771	RCSD1	0.586118	ENSG00000110880	CORO1C	0.384116	ENSG00000061987	MON2	1.13533	ENSG00000089009	RPL6	0.888466	ENSG00000106780	MEGF9
ENSG00000196531	NACA	0.0103033	ENSG00000198931	APRT	0.251389	ENSG00000205542	AC020656.256	0.224513	ENSG00000118363	SPCS2	0.0363044	ENSG00000156508	EEF1A1	0.0295405				ENSG00000122034	GTF3A	0.251758	ENSG00000005483	KMT2E	0.0981511	ENSG00000116560	SFPQ	0.0556411	ENSG00000166913	YWHAB	0.195796	ENSG00000110077	MS4A6A	0.235198	ENSG00000164691	TAGAP	0.349526	ENSG00000178951	ZBTB7A	0.584588	ENSG00000112773	TENT5A	0.384116	ENSG00000165813	CCDC186	1.13533	ENSG00000108107	RPL28	0.886557	ENSG00000143878	RHOB
ENSG00000167526	RPL13	0.00852646	ENSG00000120742	SERP1	0.251389	ENSG00000113387	AC020656.257	0.219522	ENSG00000110934	BIN2	0.0362592	ENSG00000105372	RPS19	0.0294477				ENSG00000198938	MT-CO3	0.246178	ENSG00000170315	UBB	0.0962426	ENSG00000165527	ARF6	0.0551918	ENSG00000183648	NDUFB1	0.190465	ENSG00000099977	DDT	0.234702	ENSG00000019582	CD74	0.348118	ENSG00000126247	CAPNS1	0.58042	ENSG00000131370	SH3BP5	0.380718	ENSG00000137642	SORL1	1.13533	ENSG00000161016	RPL8	0.882378	ENSG00000188529	SRSF10
ENSG00000198727	MT-CYB	0.00817151	ENSG00000160310	PRMT2	0.248909	ENSG00000115977	AC020656.258	0.215495	ENSG00000117091	CD48	0.03522	ENSG00000197958	RPL12	0.0291691				ENSG00000137076	TLN1	0.244563	ENSG00000136758	YME1L1	0.0946921	ENSG00000130755	GMFG	0.0545101	ENSG00000215845	TSTD1	0.189464	ENSG00000205937	RNPS1	0.234055	ENSG00000170458	CD14	0.347247	ENSG00000060971	ACAA1	0.579294	ENSG00000175567	UCP2	0.377246	ENSG00000160326	SLC2A6	1.13533	ENSG00000196154	S100A4	0.880915	ENSG00000221869	CEBPD
ENSG00000142168	SOD1	0.00740595	ENSG00000078304	PPP2R5C	0.247176	ENSG00000125835	AC020656.259	0.214901	ENSG00000169100	SLC25A6	0.0340998	ENSG00000089009	RPL6	0.0287153				ENSG00000115956	PLEK	0.240263	ENSG00000102879	CORO1A	0.094688	ENSG00000173821	RNF213	0.0544312	ENSG00000177606	JUN	0.188231	ENSG00000134308	YWHAQ	0.233373	ENSG00000130724	CHMP2A	0.34661	ENSG00000164022	AIMP1	0.575682	ENSG00000143878	RHOB	0.376046	ENSG00000107263	RAPGEF1	1.13533	ENSG00000198668	CALM1	0.877357	ENSG00000161929	SCIMP
ENSG00000142937	RPS8	0.0058944	ENSG00000132341	RAN	0.247176	ENSG00000198786	AC020656.260	0.214648	ENSG00000048740	CELF2	0.0336294	ENSG00000198931	APRT	0.0286885				ENSG00000213719	CLIC1	0.237403	ENSG00000164919	COX6C	0.0941616	ENSG00000130429	ARPC1B	0.0541586	ENSG00000126267	COX6B1	0.187891	ENSG00000101294	HM13	0.232799	ENSG00000086061	DNAJA1	0.346258	ENSG00000198160	MIER1	0.575682	ENSG00000140575	IQGAP1	0.375375	ENSG00000146834	MEPCE	1.13533	ENSG00000166710	B2M	0.874177	ENSG00000136040	PLXNC1
ENSG00000185885	IFITM1	0.00567662	ENSG00000160888	IER2	0.245801	ENSG00000122545	AC020656.261	0.214185	ENSG00000153113	CAST	0.0335434	ENSG00000123144	TRIR	0.0261229				ENSG00000189403	HMGB1	0.233208	ENSG00000082153	BZW1	0.0922275	ENSG00000197943	PLCG2	0.0533079	ENSG00000198668	CALM1	0.187527	ENSG00000172354	GNB2	0.232283	ENSG00000115053	NCL	0.344525	ENSG00000136436	CALCOCO2	0.572515	ENSG00000100345	MYH9	0.37476	ENSG00000198818	SFT2D1	1.13533	ENSG00000121552	CSTA	0.868424	ENSG00000143870	PDIA6
ENSG00000087086	FTL	0.00445098	ENSG00000185201	IFITM2	0.245215	ENSG00000143761	AC020656.262	0.214185	ENSG00000105993	DNAJB6	0.0334343	ENSG00000137154	RPS6	0.0237963				ENSG00000099977	DDT	0.232649	ENSG00000099622	CIRBP	0.0921417	ENSG00000091527	CDV3	0.0523886	ENSG00000162704	ARPC5	0.185599	ENSG00000132274	TRIM22	0.231715	ENSG00000082074	FYB1	0.343443	ENSG00000089127	OAS1	0.567221	ENSG00000135387	CAPRIN1	0.374592	ENSG00000146192	FGD2	1.13533	ENSG00000196352	CD55	0.868424	ENSG00000118418	HMGN3
ENSG00000131508	UBE2D2	0.00358424	ENSG00000182866	LCK	0.243315	ENSG00000150991	AC020656.263	0.212987	ENSG00000165119	HNRNPK	0.0330554	ENSG00000164919	COX6C	0.0219466				ENSG00000105369	CD79A	0.230086	ENSG00000135390	ATP5MC2	0.0883706	ENSG00000107581	EIF3A	0.0521889	ENSG00000182866	LCK	0.185599	ENSG00000135046	ANXA1	0.231458	ENSG00000119335	SET	0.342011	ENSG00000198408	OGA	0.567221	ENSG00000176101	SSNA1	0.370071	ENSG00000113580	NR3C1	1.13533	ENSG00000185950	IRS2	0.855824	ENSG00000125868	DSTN
ENSG00000169564	PCBP1	0.00358424	ENSG00000101608	MYL12A	0.243141	ENSG00000115165	AC020656.264	0.212809	ENSG00000169714	CNBP	0.0317133	ENSG00000124172	ATP5F1E	0.0206206				ENSG00000211897	IGHG3	0.223189	ENSG00000146278	PNRC1	0.0881169	ENSG00000102879	CORO1A	0.0521834	ENSG00000142227	EMP3	0.184827	ENSG00000105193	RPS16	0.230552	ENSG00000177189	RPS6KA3	0.340964	ENSG00000109320	NFKB1	0.565291	ENSG00000068305	MEF2A	0.370071	ENSG00000134982	APC	1.13533	ENSG00000177105	RHOG	0.855824	ENSG00000160551	TAOK1
ENSG00000198918	RPL39	0.00147287	ENSG00000188529	SRSF10	0.24249	ENSG00000198886	AC020656.265	0.208747	ENSG00000101745	ANKRD12	0.0309572	ENSG00000165502	RPL36AL	0.0195017				ENSG00000103275	UBE2I	0.223189	ENSG00000106153	CHCHD2	0.0864525	ENSG00000118181	RPS25	0.0515418	ENSG00000113558	SKP1	0.184466	ENSG00000110955	ATP5F1B	0.230232	ENSG00000069329	VPS35	0.339231	ENSG00000221869	CEBPD	0.5627	ENSG00000076944	STXBP2	0.368645	ENSG00000181381	DDX60L	1.13533	ENSG00000120533	ENY2	0.855824	ENSG00000164163	ABCE1
ENSG00000125356	NDUFA1	0.000581751	ENSG00000198668	CALM1	0.242029	ENSG00000090266	AC020656.266	0.208388	ENSG00000105372	RPS19	0.0294842	ENSG00000145592	RPL37	0.0188992				ENSG00000153064	BANK1	0.218206	ENSG00000110321	EIF4G2	0.0847122	ENSG00000169020	ATP5ME	0.0514096	ENSG00000127540	UQCR11	0.175973	ENSG00000178952	TUFM	0.229565	ENSG00000196735	HLA-DQA1	0.338604	ENSG00000147548	NSD3	0.56222	ENSG00000198727	MT-CYB	0.3659	ENSG00000109381	ELF2	1.13533	ENSG00000164405	UQCRQ	0.855824	ENSG00000177565	TBL1XR1
			ENSG00000005483	KMT2E	0.241734	ENSG00000164919	AC020656.267	0.207618	ENSG00000115053	NCL	0.0294565	ENSG00000108298	RPL19	0.0150085				ENSG00000112335	SNX3	0.217543	ENSG00000124172	ATP5F1E	0.083394	ENSG00000077549	CAPZB	0.0499875	ENSG00000126524	SBDS	0.17464	ENSG00000025708	TYMP	0.229402	ENSG00000166913	YWHAB	0.338482	ENSG00000173230	GOLGB1	0.56222	ENSG00000153815	CMIP	0.365611	ENSG00000010256	UQCRC1	1.13533	ENSG00000153922	CHD1	0.855824	ENSG00000169413	RNASE6
			ENSG00000152558	TMEM123	0.240398	ENSG00000188186	AC020656.268	0.20732	ENSG00000063046	EIF4B	0.0290472	ENSG00000142168	SOD1	0.0148593				ENSG00000213626	LBH	0.21379	ENSG00000130770	ATP5IF1	0.0821397	ENSG00000125356	NDUFA1	0.0464652	ENSG00000147123	NDUFB11	0.174268	ENSG00000116459	ATP5PB	0.229292	ENSG00000187555	USP7	0.337727	ENSG00000090382	LYZ	0.561824	ENSG00000112679	DUSP22	0.365611	ENSG00000135968	GCC2	1.13533	ENSG00000162909	CAPN2	0.855824	ENSG00000147416	ATP6V1B2
			ENSG00000187239	FNBP1	0.239997	ENSG00000117523	AC020656.269	0.20655	ENSG00000131174	COX7B	0.0290048	ENSG00000164985	PSIP1	0.0145039				ENSG00000197747	S100A10	0.213041	ENSG00000080824	HSP90AA1	0.0820733	ENSG00000089157	RPLP0	0.0450939	ENSG00000114857	NKTR	0.173816	ENSG00000116044	NFE2L2	0.228711	ENSG00000138085	ATRAID	0.337727	ENSG00000172322	CLEC12A	0.561735	ENSG00000182247	UBE2E2	0.365611	ENSG00000275052	PPP4R3B	1.13533	ENSG00000175390	EIF3F	0.855824	ENSG00000168769	TET2
			ENSG00000162511	LAPTM5	0.239886	ENSG00000100664	AC020656.270	0.204847	ENSG00000140264	SERF2	0.0286916	ENSG00000241837	ATP5PO	0.0123076				ENSG00000153187	HNRNPU	0.211116	ENSG00000145287	PLAC8	0.0818071	ENSG00000140264	SERF2	0.0442483	ENSG00000020633	RUNX3	0.173816	ENSG00000154146	NRGN	0.226861	ENSG00000163171	CDC42EP3	0.336917	ENSG00000086065	CHMP5	0.561146	ENSG00000169554	ZEB2	0.363937	ENSG00000084676	NCOA1	1.13533	ENSG00000241343	RPL36A	0.855824	ENSG00000054118	THRAP3
			ENSG00000245164	LINC00861	0.237395	ENSG00000153187	AC020656.271	0.196673	ENSG00000106803	SEC61B	0.0286419	ENSG00000189043	NDUFA4	0.0113788				ENSG00000149311	ATM	0.209114	ENSG00000197622	CDC42SE1	0.0805304	ENSG00000156467	UQCRB	0.0400873	ENSG00000171223	JUNB	0.172392	ENSG00000178209	PLEC	0.225678	ENSG00000179262	RAD23A	0.336798	ENSG00000170542	SERPINB9	0.560416	ENSG00000159216	RUNX1	0.363844	ENSG00000117691	NENF	1.13533	ENSG00000163221	S100A12	0.851351	ENSG00000164346	NSA2
			ENSG00000198786	MT-ND5	0.236366	ENSG00000255823	AC020656.272	0.195893	ENSG00000143774	GUK1	0.0277583	ENSG00000147403	RPL10	0.0107864				ENSG00000167978	SRRM2	0.206315	ENSG00000142864	SERBP1	0.0799432	ENSG00000111348	ARHGDIB	0.0399009	ENSG00000188612	SUMO2	0.17195	ENSG00000121316	PLBD1	0.225574	ENSG00000092841	MYL6	0.335031	ENSG00000005810	MYCBP2	0.558918	ENSG00000017797	RALBP1	0.36257	ENSG00000116747	TROVE2	1.13533	ENSG00000145592	RPL37	0.844389	ENSG00000204103	MAFB
			ENSG00000128340	RAC2	0.232724	ENSG00000166710	AC020656.273	0.195281	ENSG00000177700	POLR2L	0.0270123	ENSG00000110696	C11orf58	0.0104604				ENSG00000229117	RPL41	0.204824	ENSG00000185787	MORF4L1	0.0773391	ENSG00000078304	PPP2R5C	0.0389974	ENSG00000008517	IL32	0.159877	ENSG00000068650	ATP11A	0.225543	ENSG00000170581	STAT2	0.334213	ENSG00000071626	DAZAP1	0.556574	ENSG00000165795	NDRG2	0.36257	ENSG00000117862	TXNDC12	1.13533	ENSG00000186468	RPS23	0.833149	ENSG00000134056	MRPS36
			ENSG00000169442	CD52	0.229199	ENSG00000213719	AC020656.274	0.195219	ENSG00000189067	LITAF	0.0256623	ENSG00000120129	DUSP1	0.00872323				ENSG00000152795	HNRNPDL	0.204453	ENSG00000187514	PTMA	0.0722396	ENSG00000143933	CALM2	0.0381486	ENSG00000166710	B2M	0.158913	ENSG00000069275	NUCKS1	0.224487	ENSG00000030582	GRN	0.33401	ENSG00000111790	FGFR1OP2	0.556574	ENSG00000170017	ALCAM	0.36257	ENSG00000142684	ZNF593	1.13533	ENSG00000156273	BACH1	0.81735	ENSG00000144895	EIF2A
			ENSG00000129562	DAD1	0.226119	ENSG00000146066	AC020656.275	0.195026	ENSG00000221983	UBA52	0.0256261	ENSG00000165119	HNRNPK	0.00825055				ENSG00000180353	HCLS1	0.202127	ENSG00000197540	GZMM	0.0704712	ENSG00000172809	RPL38	0.0378046	ENSG00000099624	ATP5F1D	0.158144	ENSG00000169508	GPR183	0.224362	ENSG00000136754	ABI1	0.333354	ENSG00000105967	TFEC	0.556574	ENSG00000165527	ARF6	0.362306	ENSG00000119900	OGFRL1	1.13533	ENSG00000214212	C19orf38	0.81735	ENSG00000128272	ATF4
			ENSG00000142227	EMP3	0.223485	ENSG00000110696	AC020656.276	0.19362	ENSG00000168298	HIST1H1E	0.0250319	ENSG00000135486	HNRNPA1	0.00790657				ENSG00000162783	IER5	0.195175	ENSG00000118680	MYL12B	0.0699906	ENSG00000234745	HLA-B	0.0374885	ENSG00000130332	LSM7	0.156055	ENSG00000169926	KLF13	0.223272	ENSG00000153147	SMARCA5	0.333354	ENSG00000169826	CSGALNACT2	0.552386	ENSG00000197747	S100A10	0.362114	ENSG00000143878	RHOB	1.12419	ENSG00000260916	CCPG1	0.81735	ENSG00000173113	TRMT112
			ENSG00000179218	CALR	0.21978	ENSG00000092199	AC020656.277	0.191749	ENSG00000106153	CHCHD2	0.0249295	ENSG00000119335	SET	0.00747249				ENSG00000110696	C11orf58	0.189637	ENSG00000175390	EIF3F	0.0692113	ENSG00000110958	PTGES3	0.0372202	ENSG00000241468	ATP5MF	0.156055	ENSG00000067900	ROCK1	0.223245	ENSG00000158869	FCER1G	0.332623	ENSG00000134333	LDHA	0.552386	ENSG00000158710	TAGLN2	0.361941	ENSG00000162924	REL	1.12083	ENSG00000172322	CLEC12A	0.81735	ENSG00000135655	USP15
			ENSG00000165119	HNRNPK	0.21978	ENSG00000157514	AC020656.278	0.190425	ENSG00000165527	ARF6	0.0249209	ENSG00000100316	RPL3	0.00718758				ENSG00000116288	PARK7	0.189637	ENSG00000188186	LAMTOR4	0.068312	ENSG00000133226	SRRM1	0.0366572	ENSG00000104894	CD37	0.155531	ENSG00000162704	ARPC5	0.223148	ENSG00000154146	NRGN	0.331503	ENSG00000135404	CD63	0.55122	ENSG00000183011	NAA38	0.361029	ENSG00000185650	ZFP36L1	1.12083	ENSG00000122359	ANXA11	0.81735	ENSG00000167978	SRRM2
			ENSG00000108654	DDX5	0.219248	ENSG00000160654	AC020656.279	0.189378	ENSG00000113811	SELENOK	0.0225884	ENSG00000112306	RPS12	0.00718126				ENSG00000150991	UBC	0.188661	ENSG00000120616	EPC1	0.0670507	ENSG00000198899	MT-ATP6	0.0338962	ENSG00000173821	RNF213	0.154841	ENSG00000140575	IQGAP1	0.222138	ENSG00000169403	PTAFR	0.330504	ENSG00000099341	PSMD8	0.550147	ENSG00000185043	CIB1	0.360414	ENSG00000117091	CD48	1.12083	ENSG00000145416	2021-03-01	0.81735	ENSG00000197629	MPEG1
			ENSG00000122565	CBX3	0.218743	ENSG00000166913	AC020656.280	0.188546	ENSG00000166913	YWHAB	0.0223578	ENSG00000179144	GIMAP7	0.00498379				ENSG00000255823	MTRNR2L8	0.18727	ENSG00000184260	HIST2H2AC	0.0662502	ENSG00000125740	FOSB	0.032954	ENSG00000115128	SF3B6	0.153489	ENSG00000175602	CCDC85B	0.221182	ENSG00000240972	MIF	0.32945	ENSG00000077984	CST7	0.550147	ENSG00000108175	ZMIZ1	0.359162	ENSG00000120063	GNA13	1.11458	ENSG00000144597	EAF1	0.81735	ENSG00000118515	SGK1
			ENSG00000197111	PCBP2	0.217603	ENSG00000115091	AC020656.281	0.185457	ENSG00000067560	RHOA	0.0219743	ENSG00000167286	CD3D	0.00438683				ENSG00000089220	PEBP1	0.185121	ENSG00000075415	SLC25A3	0.0644693	ENSG00000026508	CD44	0.0325579	ENSG00000204592	HLA-E	0.149715	ENSG00000113712	CSNK1A1	0.221013	ENSG00000007237	GAS7	0.328336	ENSG00000134287	ARF3	0.550147	ENSG00000177156	TALDO1	0.359034	ENSG00000140299	BNIP2	1.11458	ENSG00000117410	ATP6V0B	0.809531	ENSG00000105323	HNRNPUL1
			ENSG00000126267	COX6B1	0.216069	ENSG00000162434	AC020656.282	0.181064	ENSG00000132424	PNISR	0.0214706	ENSG00000104660	LEPROTL1	0.00426422				ENSG00000111640	GAPDH	0.184543	ENSG00000140941	MAP1LC3B	0.0635015	ENSG00000109332	UBE2D3	0.031251	ENSG00000147677	EIF3H	0.149177	ENSG00000073756	PTGS2	0.220169	ENSG00000204256	BRD2	0.328336	ENSG00000160075	SSU72	0.550147	ENSG00000118855	MFSD1	0.358993	ENSG00000143742	SRP9	1.11458	ENSG00000113712	CSNK1A1	0.804294	ENSG00000118705	RPN2
			ENSG00000141002	TCF25	0.215523	ENSG00000120129	AC020656.283	0.178465	ENSG00000213719	CLIC1	0.0212751	ENSG00000198755	RPL10A	0.00334568				ENSG00000106153	CHCHD2	0.178202	ENSG00000150991	UBC	0.0627911	ENSG00000204642	HLA-F	0.0308717	ENSG00000113811	SELENOK	0.148822	ENSG00000125538	IL1B	0.220107	ENSG00000119707	RBM25	0.323174	ENSG00000136238	RAC1	0.549848	ENSG00000253729	PRKDC	0.357735	ENSG00000000938	FGR	1.10886	ENSG00000198242	RPL23A	0.801668	ENSG00000140044	JDP2
			ENSG00000169045	HNRNPH1	0.211335	ENSG00000099860	AC020656.284	0.17382	ENSG00000127314	RAP1B	0.0203265	ENSG00000177954	RPS27	0.00331746				ENSG00000157514	TSC22D3	0.175492	ENSG00000112695	COX7A2	0.0625462	ENSG00000118816	CCNI	0.0294343	ENSG00000142669	SH3BGRL3	0.14849	ENSG00000003056	M6PR	0.218172	ENSG00000177989	ODF3B	0.323174	ENSG00000125534	PPDPF	0.549156	ENSG00000177189	RPS6KA3	0.356088	ENSG00000130511	SSBP4	1.09881	ENSG00000112306	RPS12	0.798761	ENSG00000122705	CLTA
			ENSG00000143119	CD53	0.210651	ENSG00000106153	AC020656.285	0.173564	ENSG00000171476	HOPX	0.0195847	ENSG00000108518	PFN1	0.00294601				ENSG00000119801	YPEL5	0.171101	ENSG00000169976	SF3B5	0.0607419	ENSG00000184007	PTP4A2	0.0293466	ENSG00000125534	PPDPF	0.141498	ENSG00000158517	NCF1	0.218124	ENSG00000169230	PRELID1	0.322704	ENSG00000132341	RAN	0.547803	ENSG00000158869	FCER1G	0.355411	ENSG00000136450	SRSF1	1.09881	ENSG00000182718	ANXA2	0.793763	ENSG00000106052	TAX1BP1
			ENSG00000074800	ENO1	0.210651	ENSG00000108654	AC020656.286	0.172473	ENSG00000110848	CD69	0.0179235	ENSG00000173726	TOMM20	0.00239316				ENSG00000162191	UBXN1	0.167694	ENSG00000165119	HNRNPK	0.0591599	ENSG00000188243	COMMD6	0.028107	ENSG00000106153	CHCHD2	0.14127	ENSG00000115355	CCDC88A	0.21771	ENSG00000152558	TMEM123	0.320068	ENSG00000120071	KANSL1	0.547803	ENSG00000105329	TGFB1	0.354723	ENSG00000186298	PPP1CC	1.09881	ENSG00000136238	RAC1	0.793763	ENSG00000153914	SREK1
			ENSG00000092841	MYL6	0.210523	ENSG00000089280	AC020656.287	0.171813	ENSG00000228474	OST4	0.017746							ENSG00000112081	SRSF3	0.167694	ENSG00000175602	CCDC85B	0.0561489	ENSG00000134333	LDHA	0.0275717	ENSG00000130429	ARPC1B	0.139945	ENSG00000117151	CTBS	0.216863	ENSG00000169976	SF3B5	0.319291	ENSG00000148672	GLUD1	0.547803	ENSG00000146007	ZMAT2	0.354723	ENSG00000136051	WASHC4	1.09881	ENSG00000116251	RPL22	0.792772	ENSG00000109270	LAMTOR3
			ENSG00000157514	TSC22D3	0.20902	ENSG00000167552	AC020656.288	0.171022	ENSG00000123349	PFDN5	0.0166486							ENSG00000204257	HLA-DMA	0.167694	ENSG00000165502	RPL36AL	0.0557208	ENSG00000155368	DBI	0.0267412	ENSG00000146066	HIGD2A	0.139673	ENSG00000111843	TMEM14C	0.2168	ENSG00000111642	CHD4	0.318937	ENSG00000083896	YTHDC1	0.547803	ENSG00000139726	DENR	0.354723	ENSG00000073921	PICALM	1.09881	ENSG00000090382	LYZ	0.792399	ENSG00000138674	SEC31A
			ENSG00000185088	RPS27L	0.205841	ENSG00000169045	AC020656.289	0.170722	ENSG00000135390	ATP5MC2	0.0161771							ENSG00000169230	PRELID1	0.160905	ENSG00000232112	TMA7	0.0539098	ENSG00000109971	HSPA8	0.0259052	ENSG00000163466	ARPC2	0.137982	ENSG00000134516	DOCK2	0.216426	ENSG00000143183	TMCO1	0.318937	ENSG00000102524	TNFSF13B	0.545494	ENSG00000145819	ARHGAP26	0.354723	ENSG00000110446	SLC15A3	1.09881	ENSG00000134419	RPS15A	0.787806	ENSG00000169019	COMMD8
			ENSG00000065809	FAM107B	0.198921	ENSG00000167004	AC020656.290	0.166403	ENSG00000204628	RACK1	0.0160815							ENSG00000054267	ARID4B	0.160905	ENSG00000131051	RBM39	0.0508247	ENSG00000123146	ADGRE5	0.0239006	ENSG00000103363	ELOB	0.137659	ENSG00000159388	BTG2	0.215124	ENSG00000171858	RPS21	0.318126	ENSG00000072778	ACADVL	0.542768	ENSG00000113163	COL4A3BP	0.354723	ENSG00000156587	UBE2L6	1.09881	ENSG00000185650	ZFP36L1	0.7867	ENSG00000163659	TIPARP
			ENSG00000115165	CYTIP	0.196753	ENSG00000177733	AC020656.291	0.163642	ENSG00000169020	ATP5ME	0.0155679							ENSG00000120727	PAIP2	0.158649	ENSG00000044574	HSPA5	0.0505775	ENSG00000143774	GUK1	0.0187792	ENSG00000129559	NEDD8	0.136793	ENSG00000005893	LAMP2	0.215024	ENSG00000067064	IDI1	0.316511	ENSG00000163823	CCR1	0.542768	ENSG00000026297	RNASET2	0.353981	ENSG00000120899	PTK2B	1.09881	ENSG00000170458	CD14	0.785815	ENSG00000174718	KIAA1551
			ENSG00000170515	PA2G4	0.195624	ENSG00000135046	AC020656.292	0.161346	ENSG00000156467	UQCRB	0.0152106							ENSG00000142541	RPL13A	0.156972	ENSG00000134884	ARGLU1	0.0497084	ENSG00000175390	EIF3F	0.0179596	ENSG00000091527	CDV3	0.136793	ENSG00000122565	CBX3	0.213848	ENSG00000143013	LMO4	0.315207	ENSG00000125652	ALKBH7	0.5395	ENSG00000129515	SNX6	0.35341	ENSG00000145012	LPP	1.09881	ENSG00000183019	MCEMP1	0.777822	ENSG00000108100	CCNY
			ENSG00000173915	ATP5MD	0.194462	ENSG00000026508	AC020656.293	0.160453	ENSG00000122566	HNRNPA2B1	0.013847							ENSG00000130811	EIF3G	0.155374	ENSG00000115053	NCL	0.0469731	ENSG00000112081	SRSF3	0.0178532	ENSG00000119335	SET	0.135424	ENSG00000268734	AC245128.3	0.212536	ENSG00000127528	KLF2	0.314983	ENSG00000103266	STUB1	0.5395	ENSG00000125970	RALY	0.352703	ENSG00000173889	PHC3	1.09881	ENSG00000120690	ELF1	0.777822	ENSG00000168264	IRF2BP2
			ENSG00000182196	ARL6IP4	0.192428	ENSG00000132002	AC020656.294	0.159192	ENSG00000231500	RPS18	0.0128804							ENSG00000240065	PSMB9	0.155374	ENSG00000166136	NDUFB8	0.0462521	ENSG00000152795	HNRNPDL	0.0160402	ENSG00000231925	TAPBP	0.134098	ENSG00000117450	PRDX1	0.212381	ENSG00000110422	HIPK3	0.314758	ENSG00000102580	DNAJC3	0.5395	ENSG00000146729	NIPSNAP2	0.352703	ENSG00000077097	TOP2B	1.09881	ENSG00000145819	ARHGAP26	0.777822	ENSG00000099622	CIRBP
			ENSG00000120690	ELF1	0.189838	ENSG00000184897	AC020656.295	0.158197	ENSG00000089009	RPL6	0.0121721							ENSG00000211677	IGLC2	0.154582	ENSG00000167283	ATP5MG	0.044185	ENSG00000108107	RPL28	0.0159739	ENSG00000155368	DBI	0.134098	ENSG00000139496	NUP58	0.211651	ENSG00000081041	CXCL2	0.314758	ENSG00000145779	TNFAIP8	0.5395	ENSG00000163220	S100A9	0.352349	ENSG00000134186	PRPF38B	1.09881	ENSG00000172757	CFL1	0.769784	ENSG00000117614	SYF2
			ENSG00000197943	PLCG2	0.187462	ENSG00000185043	AC020656.296	0.158014	ENSG00000126264	HCST	0.0104238							ENSG00000152082	MZT2B	0.150187	ENSG00000088986	DYNLL1	0.0428309	ENSG00000115738	ID2	0.0150729	ENSG00000143543	JTB	0.134098	ENSG00000147274	RBMX	0.210255	ENSG00000110077	MS4A6A	0.31453	ENSG00000159377	PSMB4	0.5395	ENSG00000135334	AKIRIN2	0.350934	ENSG00000157873	TNFRSF14	1.09881	ENSG00000149273	RPS3	0.768361	ENSG00000086300	SNX10
			ENSG00000089220	PEBP1	0.186726	ENSG00000265241	AC020656.297	0.157799	ENSG00000114391	RPL24	0.0097777							ENSG00000167283	ATP5MG	0.145593	ENSG00000188612	SUMO2	0.0423687	ENSG00000203747	FCGR3A	0.0142723	ENSG00000117091	CD48	0.133961	ENSG00000168461	RAB31	0.209929	ENSG00000119705	SLIRP	0.31453	ENSG00000137776	SLTM	0.537208	ENSG00000198805	PNP	0.350802	ENSG00000105404	RABAC1	1.07644	ENSG00000102317	RBM3	0.764401	ENSG00000142089	IFITM3
			ENSG00000135968	GCC2	0.184627	ENSG00000172115	AC020656.298	0.157739	ENSG00000140988	RPS2	0.00957019							ENSG00000184076	UQCR10	0.140727	ENSG00000211751	TRBC1	0.039671	ENSG00000164919	COX6C	0.0138898	ENSG00000265241	RBM8A	0.132396	ENSG00000130402	ACTN4	0.20977	ENSG00000136869	TLR4	0.31453	ENSG00000147274	RBMX	0.536026	ENSG00000183023	SLC8A1	0.350802	ENSG00000164308	ERAP2	1.07644	ENSG00000071082	RPL31	0.763175	ENSG00000103994	ZNF106
			ENSG00000089737	DDX24	0.179077	ENSG00000112576	AC020656.299	0.157314	ENSG00000204264	PSMB8	0.00775939							ENSG00000169714	CNBP	0.140727	ENSG00000162434	JAK1	0.0379653	ENSG00000131143	COX4I1	0.0137138	ENSG00000099622	CIRBP	0.131571	ENSG00000169564	PCBP1	0.209077	ENSG00000245532	NEAT1	0.314169	ENSG00000121858	TNFSF10	0.53469	ENSG00000156273	BACH1	0.349765	ENSG00000204592	HLA-E	1.07424	ENSG00000149357	LAMTOR1	0.761702	ENSG00000153922	CHD1
			ENSG00000167552	TUBA1A	0.176943	ENSG00000169976	AC020656.300	0.1557	ENSG00000162191	UBXN1	0.00763575							ENSG00000211899	IGHM	0.140727	ENSG00000164346	NSA2	0.037914	ENSG00000185787	MORF4L1	0.0127415	ENSG00000101745	ANKRD12	0.126962	ENSG00000242574	HLA-DMB	0.208743	ENSG00000129003	VPS13C	0.314165	ENSG00000074800	ENO1	0.534606	ENSG00000142669	SH3BGRL3	0.349117	ENSG00000028277	POU2F2	1.06133	ENSG00000184007	PTP4A2	0.761702	ENSG00000010244	ZNF207
			ENSG00000075624	ACTB	0.17668	ENSG00000162191	AC020656.301	0.153364	ENSG00000099795	NDUFB7	0.00666555							ENSG00000091527	CDV3	0.140727	ENSG00000081237	PTPRC	0.0349491	ENSG00000159140	SON	0.0116075	ENSG00000188042	ARL4C	0.126025	ENSG00000243317	STMP1	0.207802	ENSG00000092010	PSME1	0.312394	ENSG00000117091	CD48	0.533408	ENSG00000005810	MYCBP2	0.349009	ENSG00000178952	TUFM	1.06133	ENSG00000171863	RPS7	0.761702	ENSG00000204577	LILRB3
			ENSG00000277734	TRAC	0.17312	ENSG00000187239	AC020656.302	0.152041	ENSG00000125743	SNRPD2	0.00588728							ENSG00000265972	TXNIP	0.140727	ENSG00000153234	NR4A2	0.0338597	ENSG00000198918	RPL39	0.0115624	ENSG00000132432	SEC61G	0.123351	ENSG00000146731	CCT6A	0.207017	ENSG00000105383	CD33	0.312394	ENSG00000114127	XRN1	0.532326	ENSG00000215021	PHB2	0.348703	ENSG00000163131	CTSS	1.05658	ENSG00000188243	COMMD6	0.757644	ENSG00000260032	NORAD
			ENSG00000082074	FYB1	0.17312	ENSG00000166598	AC020656.303	0.149209	ENSG00000118503	TNFAIP3	0.00521688							ENSG00000120616	EPC1	0.140727	ENSG00000251562	MALAT1	0.0323203	ENSG00000188612	SUMO2	0.0104219	ENSG00000136758	YME1L1	0.122224	ENSG00000120899	PTK2B	0.206462	ENSG00000129235	TXNDC17	0.312394	ENSG00000196502	SULT1A1	0.531038	ENSG00000092964	DPYSL2	0.348594	ENSG00000147526	TACC1	1.05045	ENSG00000125691	RPL23	0.756289	ENSG00000158869	FCER1G
			ENSG00000164096	C4orf3	0.172226	ENSG00000054267	AC020656.304	0.147853	ENSG00000130770	ATP5IF1	0.00409491							ENSG00000223865	HLA-DPB1	0.13438	ENSG00000150459	SAP18	0.0300666	ENSG00000196126	HLA-DRB1	0.00966626	ENSG00000171858	RPS21	0.120959	ENSG00000204435	CSNK2B	0.204968	ENSG00000146676	PURB	0.312394	ENSG00000121316	PLBD1	0.531038	ENSG00000196562	SULF2	0.347165	ENSG00000257923	CUX1	1.05045	ENSG00000105329	TGFB1	0.750855	ENSG00000186298	PPP1CC
			ENSG00000009307	CSDE1	0.168313	ENSG00000091527	AC020656.305	0.146621	ENSG00000233927	RPS28	0.00335626							ENSG00000186395	KRT10	0.128449	ENSG00000132432	SEC61G	0.0298292	ENSG00000197958	RPL12	0.00874438	ENSG00000115738	ID2	0.120445	ENSG00000185262	UBALD2	0.204574	ENSG00000141867	BRD4	0.311753	ENSG00000084623	EIF3I	0.530101	ENSG00000106066	CPVL	0.347165	ENSG00000204482	LST1	1.04987	ENSG00000130755	GMFG	0.750855	ENSG00000177663	IL17RA
			ENSG00000147677	EIF3H	0.165387	ENSG00000117091	AC020656.306	0.14585	ENSG00000145592	RPL37	0.00316432							ENSG00000196262	PPIA	0.12743	ENSG00000130755	GMFG	0.0298119	ENSG00000092199	HNRNPC	0.00838862	ENSG00000150991	UBC	0.117866	ENSG00000116539	ASH1L	0.204074	ENSG00000169826	CSGALNACT2	0.308857	ENSG00000155307	SAMSN1	0.529389	ENSG00000170906	NDUFA3	0.34693	ENSG00000127507	ADGRE2	1.04223	ENSG00000152291	TGOLN2	0.750855	ENSG00000072062	PRKACA
			ENSG00000087302	RTRAF	0.163056	ENSG00000003402	AC020656.307	0.144405	ENSG00000188186	LAMTOR4	0.00309204							ENSG00000188186	LAMTOR4	0.126227	ENSG00000173660	UQCRH	0.0285152	ENSG00000147604	RPL7	0.00693238	ENSG00000167996	FTH1	0.116527	ENSG00000133246	PRAM1	0.203539	ENSG00000156030	ELMSAN1	0.306393	ENSG00000263001	GTF2I	0.528829	ENSG00000176788	BASP1	0.346502	ENSG00000132530	XAF1	1.04223	ENSG00000026025	VIM	0.745781	ENSG00000129003	VPS13C
			ENSG00000131051	RBM39	0.159884	ENSG00000166794	AC020656.308	0.138375	ENSG00000145741	BTF3	0.00287453							ENSG00000112137	PHACTR1	0.123025	ENSG00000178982	EIF3K	0.0278468	ENSG00000165119	HNRNPK	0.00683744	ENSG00000105887	MTPN	0.116527	ENSG00000184922	FMNL1	0.203295	ENSG00000138592	USP8	0.306047	ENSG00000116754	SRSF11	0.528004	ENSG00000204577	LILRB3	0.346502	ENSG00000146386	ABRACL	1.03064	ENSG00000124614	RPS10	0.73718	ENSG00000125354	2021-09-06
			ENSG00000070756	PABPC1	0.159628	ENSG00000169442	AC020656.309	0.136994	ENSG00000106028	SSBP1	0.00174838							ENSG00000142534	RPS11	0.120944	ENSG00000166913	YWHAB	0.0265833	ENSG00000177600	RPLP2	0.00584546	ENSG00000186395	KRT10	0.114362	ENSG00000162909	CAPN2	0.202247	ENSG00000131495	NDUFA2	0.305252	ENSG00000109062	SLC9A3R1	0.524152	ENSG00000171314	PGAM1	0.345952	ENSG00000111913	RIPOR2	1.0264	ENSG00000169021	UQCRFS1	0.73718	ENSG00000177189	RPS6KA3
			ENSG00000092199	HNRNPC	0.159087	ENSG00000118680	AC020656.310	0.131793	ENSG00000166598	HSP90B1	0.000883352							ENSG00000220205	VAMP2	0.120827	ENSG00000204569	PPP1R10	0.0261013	ENSG00000177410	ZFAS1	0.00195235	ENSG00000130770	ATP5IF1	0.113083	ENSG00000204397	CARD16	0.201797	ENSG00000101972	STAG2	0.303883	ENSG00000089053	ANAPC5	0.524152	ENSG00000159322	ADPGK	0.345489	ENSG00000269893	SNHG8	1.02286	ENSG00000185624	P4HB	0.73718	ENSG00000164609	SLU7
			ENSG00000111913	RIPOR2	0.158983	ENSG00000135940	AC020656.311	0.131159	ENSG00000109475	RPL34	0.000575113							ENSG00000136758	YME1L1	0.120827	ENSG00000206503	HLA-A	0.0249512	ENSG00000196262	PPIA	0.00158398	ENSG00000135940	COX5B	0.112904	ENSG00000277791	PSMB3	0.201145	ENSG00000076108	BAZ2A	0.302744	ENSG00000198888	MT-ND1	0.523002	ENSG00000111011	RSRC2	0.344511	ENSG00000152518	ZFP36L2	1.0213	ENSG00000112245	PTP4A1	0.73718	ENSG00000188404	SELL
			ENSG00000169564	PCBP1	0.155853	ENSG00000128340	AC020656.312	0.1305	ENSG00000105374	NKG7	0.000533815							ENSG00000198886	MT-ND4	0.118976	ENSG00000152518	ZFP36L2	0.024802				ENSG00000106829	TLE4	0.110447	ENSG00000164104	HMGB2	0.200476	ENSG00000076662	ICAM3	0.301864	ENSG00000163565	IFI16	0.521168	ENSG00000075142	SRI	0.344192	ENSG00000167978	SRRM2	1.01986	ENSG00000161011	SQSTM1	0.73718	ENSG00000173372	C1QA
			ENSG00000133321	RARRES3	0.154933	ENSG00000133226	AC020656.313	0.13008	ENSG00000156482	RPL30	0.000106884							ENSG00000108298	RPL19	0.117295	ENSG00000122566	HNRNPA2B1	0.0229588				ENSG00000172428	COPS9	0.110447	ENSG00000118515	SGK1	0.200179	ENSG00000104915	STX10	0.30096	ENSG00000143119	CD53	0.520232	ENSG00000172795	DCP2	0.343565	ENSG00000163931	TKT	1.01612	ENSG00000174695	TMEM167A	0.73718	ENSG00000159388	BTG2
			ENSG00000136527	TRA2B	0.151666	ENSG00000198712	AC020656.314	0.129872										ENSG00000197111	PCBP2	0.115636	ENSG00000213145	CRIP1	0.0195199				ENSG00000169564	PCBP1	0.110447	ENSG00000180370	PAK2	0.199392	ENSG00000054267	ARID4B	0.299715	ENSG00000155368	DBI	0.517893	ENSG00000132386	SERPINF1	0.341764	ENSG00000198763	MT-ND2	1.01587	ENSG00000111640	GAPDH	0.733428	ENSG00000198900	TOP1
			ENSG00000159140	SON	0.151581	ENSG00000166136	AC020656.315	0.127561										ENSG00000169442	CD52	0.11098	ENSG00000182866	LCK	0.0141706				ENSG00000117616	RSRP1	0.108103	ENSG00000213694	S1PR3	0.196757	ENSG00000071127	WDR1	0.2989	ENSG00000105339	DENND3	0.517579	ENSG00000112096	SOD2	0.341547	ENSG00000168036	CTNNB1	1.01504	ENSG00000142534	RPS11	0.728191	ENSG00000171522	PTGER4
			ENSG00000099624	ATP5F1D	0.150012	ENSG00000124172	AC020656.316	0.127063										ENSG00000175390	EIF3F	0.10678	ENSG00000118816	CCNI	0.00889194				ENSG00000147649	MTDH	0.107409	ENSG00000124942	AHNAK	0.196718	ENSG00000104979	C19orf53	0.298323	ENSG00000213625	LEPROT	0.517579	ENSG00000134287	ARF3	0.34138	ENSG00000142089	IFITM3	1.00171	ENSG00000088930	XRN2	0.723374	ENSG00000198888	MT-ND1
			ENSG00000104408	EIF3E	0.149689	ENSG00000082153	AC020656.317	0.119481										ENSG00000168653	NDUFS5	0.105538	ENSG00000115977	AAK1	0.00826917				ENSG00000180879	SSR4	0.101056	ENSG00000241343	RPL36A	0.196233	ENSG00000120063	GNA13	0.297639	ENSG00000198053	SIRPA	0.516416	ENSG00000010244	ZNF207	0.339055	ENSG00000100077	GRK3	0.983331	ENSG00000127528	KLF2	0.716421	ENSG00000119541	VPS4B
			ENSG00000089157	RPLP0	0.147764	ENSG00000167863	AC020656.318	0.118328										ENSG00000103187	COTL1	0.104201	ENSG00000198712	MT-CO2	0.00564576				ENSG00000145220	LYAR	0.0997558	ENSG00000048828	FAM120A	0.195881	ENSG00000147140	NONO	0.297639	ENSG00000132842	AP3B1	0.516416	ENSG00000205352	PRR13	0.338763	ENSG00000186407	CD300E	0.983331	ENSG00000168028	RPSA	0.716421	ENSG00000178927	CYBC1
			ENSG00000123416	TUBA1B	0.144286	ENSG00000126267	AC020656.319	0.11797										ENSG00000173726	TOMM20	0.104201	ENSG00000182774	RPS17	0.0049065				ENSG00000162511	LAPTM5	0.0973557	ENSG00000198399	ITSN2	0.195818	ENSG00000143870	PDIA6	0.297639	ENSG00000156261	CCT8	0.514753	ENSG00000100796	PPP4R3A	0.336852	ENSG00000258289	CHURC1	0.983331	ENSG00000177600	RPLP2	0.7157	ENSG00000153786	ZDHHC7
			ENSG00000090266	NDUFB2	0.14403	ENSG00000089737	AC020656.320	0.117787										ENSG00000105193	RPS16	0.101705	ENSG00000123144	TRIR	0.00477786				ENSG00000177700	POLR2L	0.0955221	ENSG00000204264	PSMB8	0.195713	ENSG00000126777	KTN1	0.297425	ENSG00000173726	TOMM20	0.51422	ENSG00000167553	TUBA1C	0.336518	ENSG00000244754	N4BP2L2	0.983331	ENSG00000177410	ZFAS1	0.712233	ENSG00000104325	DECR1
			ENSG00000067048	DDX3Y	0.14104	ENSG00000197448	AC020656.321	0.114939										ENSG00000135940	COX5B	0.101199	ENSG00000166295	ANAPC16	0.00377528				ENSG00000134333	LDHA	0.0947818	ENSG00000170540	ARL6IP1	0.194406	ENSG00000241553	ARPC4	0.295729	ENSG00000163171	CDC42EP3	0.514028	ENSG00000249437	NAIP	0.336518	ENSG00000174718	KIAA1551	0.983331	ENSG00000156482	RPL30	0.712233	ENSG00000147548	NSD3
			ENSG00000169926	KLF13	0.130274	ENSG00000123144	AC020656.322	0.111779										ENSG00000105404	RABAC1	0.101199	ENSG00000110367	DDX6	0.00286413				ENSG00000198258	UBL5	0.0942686	ENSG00000196352	CD55	0.194253	ENSG00000246705	H2AFJ	0.294977	ENSG00000187608	ISG15	0.513621	ENSG00000092820	EZR	0.335864	ENSG00000171314	PGAM1	0.983331	ENSG00000127184	COX7C	0.709435	ENSG00000131724	IL13RA1
			ENSG00000115091	ACTR3	0.129582	ENSG00000107742	AC020656.323	0.111738										ENSG00000146066	HIGD2A	0.101199	ENSG00000134954	ETS1	0.00141809				ENSG00000130755	GMFG	0.0941843	ENSG00000123384	LRP1	0.193747	ENSG00000104131	EIF3J	0.294977	ENSG00000197943	PLCG2	0.513295	ENSG00000125445	MRPS7	0.335864	ENSG00000027697	IFNGR1	0.983331	ENSG00000143947	RPS27A	0.707432	ENSG00000160908	ZNF394
			ENSG00000185787	MORF4L1	0.12917	ENSG00000198727	AC020656.324	0.111152										ENSG00000185201	IFITM2	0.0922284	ENSG00000255302	EID1	0.00105877				ENSG00000110696	C11orf58	0.0907637	ENSG00000038427	VCAN	0.192705	ENSG00000090376	IRAK3	0.294073	ENSG00000038219	BOD1L1	0.513181	ENSG00000067225	PKM	0.334914	ENSG00000112343	TRIM38	0.983331	ENSG00000122406	RPL5	0.701409	ENSG00000248810	LINC02432
			ENSG00000171223	JUNB	0.124921	ENSG00000130332	AC020656.325	0.110548										ENSG00000142937	RPS8	0.0896161							ENSG00000136490	LIMD2	0.0894875	ENSG00000160213	CSTB	0.192693	ENSG00000204287	HLA-DRA	0.293124	ENSG00000177156	TALDO1	0.513048	ENSG00000160310	PRMT2	0.334259	ENSG00000177733	HNRNPA0	0.983331	ENSG00000173221	GLRX	0.69536	ENSG00000136536	2021-03-07
			ENSG00000102317	RBM3	0.124921	ENSG00000175390	AC020656.326	0.102572										ENSG00000137876	RSL24D1	0.0779912							ENSG00000150593	PDCD4	0.0885855	ENSG00000114573	ATP6V1A	0.19236	ENSG00000162772	ATF3	0.292016	ENSG00000185950	IRS2	0.512179	ENSG00000135316	SYNCRIP	0.334151	ENSG00000112851	ERBIN	0.983331	ENSG00000261371	PECAM1	0.69536	ENSG00000108424	KPNB1
			ENSG00000075415	SLC25A3	0.120919	ENSG00000111348	AC020656.327	0.102506										ENSG00000166598	HSP90B1	0.0779912							ENSG00000131051	RBM39	0.0842126	ENSG00000198804	MT-CO1	0.190528	ENSG00000129562	DAD1	0.29181	ENSG00000060237	WNK1	0.512179	ENSG00000172354	GNB2	0.333621	ENSG00000114127	XRN1	0.983331	ENSG00000030582	GRN	0.69536	ENSG00000111913	RIPOR2
			ENSG00000122545	SEPTIN7	0.118226	ENSG00000196262	AC020656.328	0.0989425										ENSG00000099622	CIRBP	0.0761867							ENSG00000101182	PSMA7	0.0839885	ENSG00000140455	USP3	0.190436	ENSG00000166326	TRIM44	0.29059	ENSG00000167703	SLC43A2	0.509085	ENSG00000196154	S100A4	0.333463	ENSG00000115232	ITGA4	0.983331	ENSG00000126432	PRDX5	0.69536	ENSG00000265972	TXNIP
			ENSG00000089327	FXYD5	0.117725	ENSG00000115875	AC020656.329	0.0982968										ENSG00000101745	ANKRD12	0.0754355							ENSG00000070831	CDC42	0.0833353	ENSG00000148700	ADD3	0.190094	ENSG00000023287	RB1CC1	0.28836	ENSG00000101307	SIRPB1	0.507664	ENSG00000157106	SMG1	0.332889	ENSG00000090621	PABPC4	0.983331	ENSG00000197043	ANXA6	0.69536	ENSG00000123338	NCKAP1L
			ENSG00000110696	C11orf58	0.116204	ENSG00000125356	AC020656.330	0.0963924										ENSG00000170776	AKAP13	0.071186							ENSG00000147065	MSN	0.080976	ENSG00000177105	RHOG	0.19001	ENSG00000150540	HNMT	0.287364	ENSG00000092203	TOX4	0.507664	ENSG00000183283	DAZAP2	0.332572	ENSG00000127603	MACF1	0.983331	ENSG00000145703	IQGAP2	0.69536	ENSG00000214253	FIS1
			ENSG00000084207	GSTP1	0.114273	ENSG00000116560	AC020656.331	0.0950002										ENSG00000005810	MYCBP2	0.071186							ENSG00000198886	MT-ND4	0.079947	ENSG00000089820	ARHGAP4	0.189144	ENSG00000008018	PSMB1	0.287009	ENSG00000144674	GOLGA4	0.507664	ENSG00000128228	SDF2L1	0.332277	ENSG00000076944	STXBP2	0.983331	ENSG00000115091	ACTR3	0.69536	ENSG00000243449	C4orf48
			ENSG00000132432	SEC61G	0.110565	ENSG00000198899	AC020656.332	0.0941224										ENSG00000143549	TPM3	0.071186							ENSG00000081237	PTPRC	0.0760043	ENSG00000105339	DENND3	0.188814	ENSG00000179218	CALR	0.286924	ENSG00000100603	SNW1	0.505293	ENSG00000184557	SOCS3	0.332277	ENSG00000124126	PREX1	0.983331	ENSG00000115310	RTN4	0.69536	ENSG00000130592	LSP1
			ENSG00000112514	CUTA	0.100046	ENSG00000122566	AC020656.333	0.0937822										ENSG00000119335	SET	0.0627244							ENSG00000114902	SPCS1	0.0737202	ENSG00000246705	H2AFJ	0.187697	ENSG00000114331	ACAP2	0.286891	ENSG00000084070	SMAP2	0.50459	ENSG00000111371	SLC38A1	0.331664	ENSG00000173141	MRPL57	0.983331	ENSG00000147604	RPL7	0.69111	ENSG00000166927	MS4A7
			ENSG00000166598	HSP90B1	0.0993856	ENSG00000140264	AC020656.334	0.0930355										ENSG00000128340	RAC2	0.0627244							ENSG00000232112	TMA7	0.0724578	ENSG00000018280	SLC11A1	0.187588	ENSG00000160908	ZNF394	0.286516	ENSG00000158869	FCER1G	0.503959	ENSG00000108848	LUC7L3	0.330677	ENSG00000066336	SPI1	0.983331	ENSG00000159140	SON	0.673986	ENSG00000141522	ARHGDIA
			ENSG00000111716	LDHB	0.0990807	ENSG00000204264	AC020656.335	0.0920663										ENSG00000213741	RPS29	0.0596285							ENSG00000234745	HLA-B	0.0700127	ENSG00000137642	SORL1	0.186948	ENSG00000278311	GGNBP2	0.286516	ENSG00000062716	VMP1	0.502842	ENSG00000197629	MPEG1	0.329955	ENSG00000166340	TPP1	0.983331	ENSG00000028277	POU2F2	0.673986	ENSG00000196072	BLOC1S2
			ENSG00000104894	CD37	0.0984485	ENSG00000159140	AC020656.336	0.0914116										ENSG00000171858	RPS21	0.0552993							ENSG00000136167	LCP1	0.0671755	ENSG00000068366	ACSL4	0.186849	ENSG00000153827	TRIP12	0.284586	ENSG00000158517	NCF1	0.500107	ENSG00000135535	CD164	0.329734	ENSG00000164733	CTSB	0.983331	ENSG00000158517	NCF1	0.673986	ENSG00000170525	PFKFB3
			ENSG00000182670	TTC3	0.0963516	ENSG00000196776	AC020656.337	0.0900639										ENSG00000142168	SOD1	0.0543122							ENSG00000175602	CCDC85B	0.0669008	ENSG00000100911	PSME2	0.186743	ENSG00000134108	ARL8B	0.282563	ENSG00000157106	SMG1	0.499788	ENSG00000198888	MT-ND1	0.329375	ENSG00000147065	MSN	0.983331	ENSG00000105372	RPS19	0.670907	ENSG00000177156	TALDO1
			ENSG00000269893	SNHG8	0.0959097	ENSG00000099795	AC020656.338	0.0890027										ENSG00000173113	TRMT112	0.0543122							ENSG00000118503	TNFAIP3	0.0649012	ENSG00000112531	QKI	0.186702	ENSG00000239998	LILRA2	0.281995	ENSG00000108424	KPNB1	0.49768	ENSG00000137575	SDCBP	0.328481	ENSG00000164691	TAGAP	0.983331	ENSG00000169564	PCBP1	0.66679	ENSG00000104312	RIPK2
			ENSG00000164032	H2AFZ	0.0955198	ENSG00000132475	AC020656.339	0.0820533										ENSG00000215845	TSTD1	0.0543122							ENSG00000162434	JAK1	0.0636089	ENSG00000172216	CEBPB	0.186619	ENSG00000161960	EIF4A1	0.281302	ENSG00000008083	JARID2	0.49768	ENSG00000147649	MTDH	0.328043	ENSG00000120265	PCMT1	0.983331	ENSG00000117091	CD48	0.66679	ENSG00000042753	AP2S1
			ENSG00000142541	RPL13A	0.0944094	ENSG00000044574	AC020656.340	0.0798348										ENSG00000172183	ISG20	0.0501244							ENSG00000159388	BTG2	0.0623603	ENSG00000087266	SH3BP2	0.186565	ENSG00000204264	PSMB8	0.281262	ENSG00000153922	CHD1	0.49768	ENSG00000162772	ATF3	0.327686	ENSG00000184897	H1FX	0.983331	ENSG00000188186	LAMTOR4	0.661008	ENSG00000049618	ARID1B
			ENSG00000101109	STK4	0.0932119	ENSG00000198938	AC020656.341	0.0773857										ENSG00000167658	EEF2	0.0501244							ENSG00000162783	IER5	0.0600511	ENSG00000143384	MCL1	0.185873	ENSG00000089327	FXYD5	0.280999	ENSG00000143870	PDIA6	0.49768	ENSG00000162511	LAPTM5	0.327388	ENSG00000072135	PTPN18	0.983331	ENSG00000137818	RPLP1	0.657684	ENSG00000152795	HNRNPDL
			ENSG00000101596	SMCHD1	0.0920061	ENSG00000127483	AC020656.342	0.0763326										ENSG00000124831	LRRFIP1	0.0476175							ENSG00000139644	TMBIM6	0.0529616	ENSG00000212907	MT-ND4L	0.18481	ENSG00000172922	RNASEH2C	0.280441	ENSG00000069275	NUCKS1	0.49768	ENSG00000127528	KLF2	0.327329	ENSG00000009307	CSDE1	0.983331	ENSG00000221983	UBA52	0.655929	ENSG00000175567	UCP2
			ENSG00000077549	CAPZB	0.0920061	ENSG00000133321	AC020656.343	0.075206										ENSG00000107223	EDF1	0.0476175							ENSG00000104660	LEPROTL1	0.0529616	ENSG00000177189	RPS6KA3	0.18428	ENSG00000198900	TOP1	0.279711	ENSG00000113580	NR3C1	0.495173	ENSG00000186010	NDUFA13	0.326844	ENSG00000167613	LAIR1	0.983331	ENSG00000164713	BRI3	0.652291	ENSG00000107551	RASSF4
			ENSG00000167658	EEF2	0.0903025	ENSG00000170144	AC020656.344	0.0745754										ENSG00000092841	MYL6	0.0476175							ENSG00000169714	CNBP	0.0529616	ENSG00000178951	ZBTB7A	0.18319	ENSG00000110880	CORO1C	0.278466	ENSG00000124942	AHNAK	0.494032	ENSG00000198763	MT-ND2	0.326139	ENSG00000124151	NCOA3	0.983331	ENSG00000141367	CLTC	0.652291	ENSG00000071859	FAM50A
			ENSG00000160654	CD3G	0.0876737	ENSG00000168653	AC020656.345	0.0727104										ENSG00000198804	MT-CO1	0.0457402							ENSG00000104964	AES	0.0478906	ENSG00000015285	WAS	0.183061	ENSG00000139318	DUSP6	0.278397	ENSG00000186298	PPP1CC	0.492142	ENSG00000243678	NME2	0.325576	ENSG00000175387	SMAD2	0.983331	ENSG00000140941	MAP1LC3B	0.652291	ENSG00000173744	AGFG1
			ENSG00000129003	VPS13C	0.0861015	ENSG00000008018	AC020656.346	0.0692534										ENSG00000114353	GNAI2	0.0453074							ENSG00000166295	ANAPC16	0.0441914	ENSG00000144848	ATG3	0.182974	ENSG00000153815	CMIP	0.277682	ENSG00000183726	TMEM50A	0.490985	ENSG00000168298	HIST1H1E	0.325279	ENSG00000141367	CLTC	0.983331	ENSG00000167004	PDIA3	0.652291	ENSG00000121851	POLR3GL
			ENSG00000102144	PGK1	0.0861015	ENSG00000127540	AC020656.347	0.0685308										ENSG00000136938	ANP32B	0.0421631							ENSG00000089327	FXYD5	0.0417344	ENSG00000165030	NFIL3	0.182941	ENSG00000141367	CLTC	0.277555	ENSG00000026025	VIM	0.488583	ENSG00000173436	MINOS1	0.325083	ENSG00000125107	CNOT1	0.983331	ENSG00000053254	FOXN3	0.652291	ENSG00000178741	COX5A
			ENSG00000161547	SRSF2	0.0856613	ENSG00000134884	AC020656.348	0.0673439										ENSG00000198668	CALM1	0.0417851							ENSG00000154518	ATP5MC3	0.0413737	ENSG00000196954	CASP4	0.182613	ENSG00000178719	GRINA	0.277444	ENSG00000136810	TXN	0.487626	ENSG00000110057	UNC93B1	0.324945	ENSG00000100697	DICER1	0.983331	ENSG00000091039	OSBPL8	0.652291	ENSG00000165527	ARF6
			ENSG00000116754	SRSF11	0.0850805	ENSG00000124795	AC020656.349	0.0657833										ENSG00000112695	COX7A2	0.0411913							ENSG00000116288	PARK7	0.0413737	ENSG00000153914	SREK1	0.182155	ENSG00000147526	TACC1	0.277348	ENSG00000105323	HNRNPUL1	0.486184	ENSG00000164733	CTSB	0.324134	ENSG00000174437	ATP2A2	0.983331	ENSG00000149100	EIF3M	0.652291	ENSG00000115310	RTN4
			ENSG00000130429	ARPC1B	0.0822764	ENSG00000126524	AC020656.350	0.0630309										ENSG00000166913	YWHAB	0.0376334							ENSG00000241837	ATP5PO	0.040989	ENSG00000044574	HSPA5	0.181145	ENSG00000092964	DPYSL2	0.27686	ENSG00000137100	DCTN3	0.486184	ENSG00000108064	TFAM	0.324134	ENSG00000179912	R3HDM2	0.983331	ENSG00000187239	FNBP1	0.652291	ENSG00000132274	TRIM22
			ENSG00000109332	UBE2D3	0.0811994	ENSG00000110852	AC020656.351	0.0615615										ENSG00000197943	PLCG2	0.0291489							ENSG00000213626	LBH	0.0405779	ENSG00000118503	TNFAIP3	0.181117	ENSG00000013364	MVP	0.275869	ENSG00000143761	ARF1	0.484005	ENSG00000174547	MRPL11	0.324134	ENSG00000108100	CCNY	0.983331	ENSG00000136810	TXN	0.652291	ENSG00000114861	FOXP1
			ENSG00000171490	RSL1D1	0.0811994	ENSG00000169020	AC020656.352	0.0596631										ENSG00000198712	MT-CO2	0.0272975							ENSG00000173812	EIF1	0.039947	ENSG00000197006	METTL9	0.180791	ENSG00000086598	TMED2	0.275869	ENSG00000165775	FUNDC2	0.482573	ENSG00000100764	PSMC1	0.322042	ENSG00000111817	DSE	0.983331	ENSG00000156675	RAB11FIP1	0.652291	ENSG00000138385	SSB
			ENSG00000109971	HSPA8	0.0757547	ENSG00000198668	AC020656.353	0.0589991										ENSG00000196531	NACA	0.0248975							ENSG00000075624	ACTB	0.0381996	ENSG00000125652	ALKBH7	0.180767	ENSG00000141574	SECTM1	0.275869	ENSG00000107738	VSIR	0.481367	ENSG00000035403	VCL	0.322042	ENSG00000007944	MYLIP	0.983331	ENSG00000169976	SF3B5	0.652291	ENSG00000112149	CD83
			ENSG00000163463	KRTCAP2	0.075593	ENSG00000197747	AC020656.354	0.0589152										ENSG00000131469	RPL27	0.0243478							ENSG00000177954	RPS27	0.0332302	ENSG00000135837	CEP350	0.18062	ENSG00000136238	RAC1	0.275869	ENSG00000141682	PMAIP1	0.479758	ENSG00000205937	RNPS1	0.321083	ENSG00000198585	NUDT16	0.983331	ENSG00000124762	CDKN1A	0.652291	ENSG00000138670	RASGEF1B
			ENSG00000117614	SYF2	0.0733904	ENSG00000111775	AC020656.355	0.0560158										ENSG00000231925	TAPBP	0.0211453							ENSG00000277734	TRAC	0.0322031	ENSG00000128272	ATF4	0.180515	ENSG00000163399	ATP1A1	0.274238	ENSG00000116679	IVNS1ABP	0.479758	ENSG00000173141	MRPL57	0.320775	ENSG00000164091	WDR82	0.983331	ENSG00000188313	PLSCR1	0.652291	ENSG00000169045	HNRNPH1
			ENSG00000228474	OST4	0.0727245	ENSG00000065518	AC020656.356	0.0551003										ENSG00000234745	HLA-B	0.0168668							ENSG00000076662	ICAM3	0.029878	ENSG00000187840	EIF4EBP1	0.179238	ENSG00000198053	SIRPA	0.27363	ENSG00000161547	SRSF2	0.479758	ENSG00000169021	UQCRFS1	0.320275	ENSG00000153827	TRIP12	0.983331	ENSG00000113811	SELENOK	0.652291	ENSG00000107738	VSIR
			ENSG00000120727	PAIP2	0.0712102	ENSG00000142864	AC020656.357	0.0524706										ENSG00000137818	RPLP1	0.0155098							ENSG00000143119	CD53	0.0291149	ENSG00000102524	TNFSF13B	0.179166	ENSG00000167173	C15orf39	0.2734	ENSG00000171862	PTEN	0.475654	ENSG00000124942	AHNAK	0.318751	ENSG00000115919	KYNU	0.983331	ENSG00000213639	PPP1CB	0.652291	ENSG00000013275	PSMC4
			ENSG00000117616	RSRP1	0.0707873	ENSG00000255302	AC020656.358	0.051747										ENSG00000149806	FAU	0.00913005							ENSG00000158985	CDC42SE2	0.0280153	ENSG00000123636	BAZ2B	0.178021	ENSG00000083223	TUT7	0.2734	ENSG00000180879	SSR4	0.473833	ENSG00000150093	ITGB1	0.318731	ENSG00000168159	RNF187	0.983331	ENSG00000169403	PTAFR	0.652291	ENSG00000103811	CTSH
			ENSG00000173113	TRMT112	0.070473	ENSG00000010610	AC020656.359	0.043757										ENSG00000164587	RPS14	0.00540843							ENSG00000152518	ZFP36L2	0.0270935	ENSG00000196924	FLNA	0.177684	ENSG00000123416	TUBA1B	0.272593	ENSG00000086300	SNX10	0.472805	ENSG00000148672	GLUD1	0.318305	ENSG00000161011	SQSTM1	0.983331	ENSG00000117713	ARID1A	0.652291	ENSG00000119632	IFI27L2
			ENSG00000175550	DRAP1	0.069544	ENSG00000275302	AC020656.360	0.0426451										ENSG00000172809	RPL38	0.00537508							ENSG00000107223	EDF1	0.0259946	ENSG00000159199	ATP5MC1	0.177638	ENSG00000065615	CYB5R4	0.271281	ENSG00000123384	LRP1	0.472805	ENSG00000196072	BLOC1S2	0.317356	ENSG00000172936	MYD88	0.983331	ENSG00000109332	UBE2D3	0.652291	ENSG00000110717	NDUFS8
			ENSG00000133226	SRRM1	0.0689826	ENSG00000132341	AC020656.361	0.0426168										ENSG00000049618	ARID1B	0.00484351							ENSG00000172809	RPL38	0.0251274	ENSG00000143119	CD53	0.176772	ENSG00000135604	STX11	0.271052	ENSG00000115355	CCDC88A	0.472805	ENSG00000162910	MRPL55	0.317356	ENSG00000173436	MINOS1	0.983331	ENSG00000130313	PGLS	0.637644	ENSG00000173486	FKBP2
			ENSG00000124172	ATP5F1E	0.0683372	ENSG00000146278	AC020656.362	0.0402657										ENSG00000114978	MOB1A	0.00484351							ENSG00000089280	FUS	0.0199466	ENSG00000137752	CASP1	0.176663	ENSG00000163661	PTX3	0.270798	ENSG00000100697	DICER1	0.471685	ENSG00000162704	ARPC5	0.317153	ENSG00000123358	NR4A1	0.948566	ENSG00000177674	AGTRAP	0.637644	ENSG00000176978	DPP7
			ENSG00000116560	SFPQ	0.0643792	ENSG00000112695	AC020656.363	0.0400365										ENSG00000197958	RPL12	0.00336354							ENSG00000156411	ATP5MPL	0.0195386	ENSG00000072786	STK10	0.176339	ENSG00000164405	UQCRQ	0.270574	ENSG00000125538	IL1B	0.469704	ENSG00000171862	PTEN	0.315623	ENSG00000198888	MT-ND1	0.942304	ENSG00000075415	SLC25A3	0.630265	ENSG00000185811	IKZF1
			ENSG00000126353	CCR7	0.0633661	ENSG00000131143	AC020656.364	0.0366471										ENSG00000183172	SMDT1	0.00322341							ENSG00000140319	SRP14	0.0150934	ENSG00000213246	SUPT4H1	0.175725	ENSG00000115484	CCT4	0.268049	ENSG00000128699	ORMDL1	0.467845	ENSG00000170525	PFKFB3	0.315623	ENSG00000178951	ZBTB7A	0.938937	ENSG00000125356	NDUFA1	0.630265	ENSG00000093144	ECHDC1
			ENSG00000111011	RSRC2	0.0575215	ENSG00000101745	AC020656.365	0.034177										ENSG00000153113	CAST	0.00322341							ENSG00000240065	PSMB9	0.0134333	ENSG00000138670	RASGEF1B	0.175656	ENSG00000115234	SNX17	0.267098	ENSG00000108219	TSPAN14	0.466819	ENSG00000165775	FUNDC2	0.315623	ENSG00000152818	UTRN	0.938937	ENSG00000087460	GNAS	0.625819	ENSG00000112343	TRIM38
			ENSG00000204525	HLA-C	0.0564797	ENSG00000134294	AC020656.366	0.0311237										ENSG00000177600	RPLP2	0.00214436							ENSG00000158050	DUSP2	0.00856751	ENSG00000071127	WDR1	0.175637	ENSG00000213625	LEPROT	0.266408	ENSG00000163902	RPN1	0.465971	ENSG00000171055	FEZ2	0.315623	ENSG00000103490	PYCARD	0.936789	ENSG00000114353	GNAI2	0.620721	ENSG00000165097	KDM1B
			ENSG00000167815	PRDX2	0.0545314	ENSG00000177700	AC020656.367	0.0265101										ENSG00000145592	RPL37	0.00201671							ENSG00000213741	RPS29	0.00608567	ENSG00000091592	NLRP1	0.175352	ENSG00000121064	SCPEP1	0.265709	ENSG00000167470	MIDN	0.464651	ENSG00000023287	RB1CC1	0.313604	ENSG00000126883	NUP214	0.928884	ENSG00000197956	S100A6	0.620497	ENSG00000177674	AGTRAP
			ENSG00000116288	PARK7	0.052317	ENSG00000189043	AC020656.368	0.0247352										ENSG00000242574	HLA-DMB	0.000796675							ENSG00000185787	MORF4L1	0.00405203	ENSG00000215301	DDX3X	0.175281	ENSG00000123636	BAZ2B	0.264641	ENSG00000072364	AFF4	0.464651	ENSG00000169967	MAP3K2	0.311694	ENSG00000134516	DOCK2	0.928884	ENSG00000173812	EIF1	0.619485	ENSG00000089280	FUS
			ENSG00000125835	SNRPB	0.0515476	ENSG00000269893	AC020656.369	0.022351										ENSG00000162924	REL	0.000796675							ENSG00000117614	SYF2	0.00233555	ENSG00000133961	NUMB	0.174819	ENSG00000159352	PSMD4	0.264641	ENSG00000113558	SKP1	0.46438	ENSG00000134809	TIMM10	0.310328	ENSG00000090382	LYZ	0.922506	ENSG00000076944	STXBP2	0.607897	ENSG00000147649	MTDH
			ENSG00000176731	C8orf59	0.0463109	ENSG00000167286	AC020656.370	0.0221251																			ENSG00000164346	NSA2	0.0011227	ENSG00000137409	MTCH1	0.174753	ENSG00000146729	NIPSNAP2	0.263485	ENSG00000119335	SET	0.462914	ENSG00000071553	ATP6AP1	0.310328	ENSG00000041357	PSMA4	0.921931	ENSG00000166913	YWHAB	0.607897	ENSG00000113712	CSNK1A1
			ENSG00000213654	GPSM3	0.0452774	ENSG00000106803	AC020656.371	0.0210502																			ENSG00000152082	MZT2B	0.000494208	ENSG00000184900	SUMO3	0.174494	ENSG00000243449	C4orf48	0.263485	ENSG00000134884	ARGLU1	0.462056	ENSG00000126247	CAPNS1	0.309976	ENSG00000132002	DNAJB1	0.921931	ENSG00000277791	PSMB3	0.607897	ENSG00000167552	TUBA1A
			ENSG00000241468	ATP5MF	0.0420943	ENSG00000101608	AC020656.372	0.0190836																						ENSG00000178719	GRINA	0.17327	ENSG00000241468	ATP5MF	0.263405	ENSG00000090013	BLVRB	0.461238	ENSG00000108669	CYTH1	0.308982	ENSG00000110077	MS4A6A	0.921931	ENSG00000167703	SLC43A2	0.607897	ENSG00000105193	RPS16
			ENSG00000005059	MCUB	0.0420943	ENSG00000143543	AC020656.373	0.0187921																						ENSG00000141682	PMAIP1	0.172877	ENSG00000197601	FAR1	0.260995	ENSG00000105698	USF2	0.457038	ENSG00000185650	ZFP36L1	0.307889	ENSG00000167470	MIDN	0.917743	ENSG00000185896	LAMP1	0.607897	ENSG00000132514	CLEC10A
			ENSG00000204592	HLA-E	0.040343	ENSG00000156976	AC020656.374	0.0170122																						ENSG00000185862	EVI2B	0.172784	ENSG00000114573	ATP6V1A	0.260829	ENSG00000141574	SECTM1	0.457038	ENSG00000128951	DUT	0.306717	ENSG00000133639	BTG1	0.916217	ENSG00000147454	SLC25A37	0.607897	ENSG00000135316	SYNCRIP
			ENSG00000205542	TMSB4X	0.0402314	ENSG00000136810	AC020656.375	0.0167178																						ENSG00000104979	C19orf53	0.1726	ENSG00000184014	DENND5A	0.260602	ENSG00000162772	ATF3	0.457038	ENSG00000179833	SERTAD2	0.305987	ENSG00000115165	CYTIP	0.912942	ENSG00000136279	DBNL	0.607897	ENSG00000103381	CPPED1
			ENSG00000229117	RPL41	0.0383651	ENSG00000087460	AC020656.376	0.0157427																						ENSG00000130066	SAT1	0.172322	ENSG00000147274	RBMX	0.25919	ENSG00000170909	OSCAR	0.457038	ENSG00000136603	SKIL	0.304682	ENSG00000156273	BACH1	0.912942	ENSG00000118418	HMGN3	0.607897	ENSG00000100364	KIAA0930
			ENSG00000155368	DBI	0.0374579	ENSG00000163660	AC020656.377	0.0143208																						ENSG00000141867	BRD4	0.171836	ENSG00000157873	TNFRSF14	0.25919	ENSG00000185947	ZNF267	0.457038	ENSG00000134250	NOTCH2	0.304682	ENSG00000123066	MED13L	0.912942	ENSG00000114942	EEF1B2	0.607897	ENSG00000141504	SAT2
			ENSG00000196405	EVL	0.0318113	ENSG00000125740	AC020656.378	0.0140873																						ENSG00000081237	PTPRC	0.171343	ENSG00000087088	BAX	0.258795	ENSG00000178952	TUFM	0.457038	ENSG00000117450	PRDX1	0.30355	ENSG00000076108	BAZ2A	0.912942	ENSG00000097033	SH3GLB1	0.607897	ENSG00000086598	TMED2
			ENSG00000106803	SEC61B	0.0268107	ENSG00000115523	AC020656.379	0.0105275																						ENSG00000169756	LIMS1	0.171236	ENSG00000169896	ITGAM	0.257557	ENSG00000086666	ZFAND6	0.457038	ENSG00000135842	FAM129A	0.30355	ENSG00000127914	AKAP9	0.912942	ENSG00000117614	SYF2	0.607897	ENSG00000169895	SYAP1
			ENSG00000135486	HNRNPA1	0.0260057	ENSG00000117616	AC020656.380	0.00979283																						ENSG00000166888	STAT6	0.170728	ENSG00000184557	SOCS3	0.257187	ENSG00000075415	SLC25A3	0.452237	ENSG00000077721	UBE2A	0.302559	ENSG00000144848	ATG3	0.912942	ENSG00000128340	RAC2	0.607897	ENSG00000170542	SERPINB9
			ENSG00000241837	ATP5PO	0.022351	ENSG00000269028	AC020656.381	0.00958883																						ENSG00000126267	COX6B1	0.170175	ENSG00000173821	RNF213	0.257085	ENSG00000143546	S100A8	0.451938	ENSG00000110321	EIF4G2	0.302493	ENSG00000123689	G0S2	0.909331	ENSG00000168461	RAB31	0.607897	ENSG00000145912	NHP2
			ENSG00000088205	DDX18	0.0218272	ENSG00000184076	AC020656.382	0.00845016																						ENSG00000127951	FGL2	0.169992	ENSG00000022277	RTF2	0.255596	ENSG00000100030	MAPK1	0.449913	ENSG00000148834	GSTO1	0.302466	ENSG00000091317	CMTM6	0.907383	ENSG00000187109	NAP1L1	0.607897	ENSG00000113575	PPP2CA
			ENSG00000182774	RPS17	0.0205841	ENSG00000086061	AC020656.383	0.00845016																						ENSG00000155307	SAMSN1	0.16906	ENSG00000240065	PSMB9	0.255188	ENSG00000120705	ETF1	0.449913	ENSG00000111596	CNOT2	0.302108	ENSG00000196405	EVL	0.900869	ENSG00000119335	SET	0.607897	ENSG00000153234	NR4A2
			ENSG00000079246	XRCC5	0.015003	ENSG00000109971	AC020656.384	0.00722286																						ENSG00000136167	LCP1	0.169009	ENSG00000141027	NCOR1	0.253501	ENSG00000110880	CORO1C	0.44719	ENSG00000204592	HLA-E	0.301048	ENSG00000133106	EPSTI1	0.900869	ENSG00000254087	LYN	0.607897	ENSG00000028277	POU2F2
			ENSG00000122034	GTF3A	0.0130279	ENSG00000178980	AC020656.385	0.00654057																						ENSG00000100811	YY1	0.167141	ENSG00000143162	CREG1	0.252954	ENSG00000067334	DNTTIP2	0.44719	ENSG00000131174	COX7B	0.29915	ENSG00000110442	COMMD9	0.900869	ENSG00000085224	ATRX	0.607897	ENSG00000165168	CYBB
			ENSG00000215301	DDX3X	0.0126178	ENSG00000130755	AC020656.386	0.00565153																						ENSG00000099624	ATP5F1D	0.167099	ENSG00000164104	HMGB2	0.251939	ENSG00000125347	IRF1	0.445324	ENSG00000159720	ATP6V0D1	0.298749	ENSG00000263001	GTF2I	0.900869	ENSG00000241553	ARPC4	0.607897	ENSG00000126883	NUP214
			ENSG00000051523	CYBA	0.00998497	ENSG00000135390	AC020656.387	0.00421317																						ENSG00000026025	VIM	0.166924	ENSG00000171051	FPR1	0.251142	ENSG00000140044	JDP2	0.444863	ENSG00000067334	DNTTIP2	0.298497	ENSG00000143198	MGST3	0.900869	ENSG00000204472	AIF1	0.597249	ENSG00000084070	SMAP2
			ENSG00000136156	ITM2B	0.00501128	ENSG00000136156	AC020656.388	0.00215968																						ENSG00000130779	CLIP1	0.166268	ENSG00000155307	SAMSN1	0.250715	ENSG00000149177	PTPRJ	0.444863	ENSG00000103994	ZNF106	0.298256	ENSG00000198160	MIER1	0.900869	ENSG00000139318	DUSP6	0.59279	ENSG00000171634	BPTF
			ENSG00000121966	CXCR4	0.00104908																									ENSG00000136040	PLXNC1	0.165846	ENSG00000076944	STXBP2	0.249739	ENSG00000198727	MT-CYB	0.442769	ENSG00000197943	PLCG2	0.298206	ENSG00000204103	MAFB	0.893134	ENSG00000070961	ATP2B1	0.585177	ENSG00000178695	KCTD12
			ENSG00000009790	TRAF3IP3	0.000592604																									ENSG00000108774	RAB5C	0.165523	ENSG00000141522	ARHGDIA	0.249396	ENSG00000100596	SPTLC2	0.43976	ENSG00000111237	VPS29	0.297804	ENSG00000169926	KLF13	0.893134	ENSG00000005020	SKAP2	0.585177	ENSG00000172322	CLEC12A
																														ENSG00000082074	FYB1	0.164699	ENSG00000116209	TMEM59	0.249396	ENSG00000120686	UFM1	0.43976	ENSG00000147526	TACC1	0.297389	ENSG00000130402	ACTN4	0.883796	ENSG00000116489	CAPZA1	0.585177	ENSG00000231389	HLA-DPA1
																														ENSG00000177989	ODF3B	0.164699	ENSG00000160014	CALM3	0.248902	ENSG00000164615	CAMLG	0.43976	ENSG00000187837	HIST1H1C	0.296021	ENSG00000174837	ADGRE1	0.883796	ENSG00000102879	CORO1A	0.581902	ENSG00000168036	CTNNB1
																														ENSG00000092010	PSME1	0.164134	ENSG00000173442	EHBP1L1	0.248388	ENSG00000143384	MCL1	0.439515	ENSG00000133961	NUMB	0.294988	ENSG00000108510	MED13	0.883796	ENSG00000197006	METTL9	0.577523	ENSG00000108798	ABI3
																														ENSG00000135441	BLOC1S1	0.163835	ENSG00000182196	ARL6IP4	0.24465	ENSG00000068650	ATP11A	0.438179	ENSG00000168438	CDC40	0.294768	ENSG00000278311	GGNBP2	0.883796	ENSG00000104763	ASAH1	0.577523	ENSG00000180817	PPA1
																														ENSG00000266472	MRPS21	0.163677	ENSG00000235568	NFAM1	0.243447	ENSG00000112096	SOD2	0.437379	ENSG00000091164	TXNL1	0.29384	ENSG00000168003	SLC3A2	0.883796	ENSG00000112303	VNN2	0.577523	ENSG00000112701	SENP6
																														ENSG00000123505	AMD1	0.163118	ENSG00000198727	MT-CYB	0.242737	ENSG00000157514	TSC22D3	0.437083	ENSG00000060237	WNK1	0.29384	ENSG00000083223	TUT7	0.883796	ENSG00000115271	GCA	0.571371	ENSG00000109180	OCIAD1
																														ENSG00000171858	RPS21	0.162324	ENSG00000153250	RBMS1	0.24097	ENSG00000126709	IFI6	0.435558	ENSG00000185862	EVI2B	0.292826	ENSG00000165280	VCP	0.883796	ENSG00000107372	ZFAND5	0.568726	ENSG00000127603	MACF1
																														ENSG00000114738	MAPKAPK3	0.162155	ENSG00000127947	PTPN12	0.240654	ENSG00000067167	TRAM1	0.433954	ENSG00000142347	MYO1F	0.292096	ENSG00000085514	PILRA	0.883796	ENSG00000099783	HNRNPM	0.562093	ENSG00000011422	PLAUR
																														ENSG00000172590	MRPL52	0.161974	ENSG00000173221	GLRX	0.240059	ENSG00000104852	SNRNP70	0.433954	ENSG00000127951	FGL2	0.288651	ENSG00000124562	SNRPC	0.883796	ENSG00000062716	VMP1	0.562093	ENSG00000104972	LILRB1
																														ENSG00000113441	LNPEP	0.161528	ENSG00000044574	HSPA5	0.238797	ENSG00000124357	NAGK	0.432585	ENSG00000168175	MAPK1IP1L	0.287608	ENSG00000070190	DAPP1	0.883796	ENSG00000166794	PPIB	0.562093	ENSG00000186517	ARHGAP30
																														ENSG00000122359	ANXA11	0.161326	ENSG00000159720	ATP6V0D1	0.238755	ENSG00000123636	BAZ2B	0.432092	ENSG00000156587	UBE2L6	0.287608	ENSG00000115677	HDLBP	0.883796	ENSG00000129084	PSMA1	0.562093	ENSG00000116741	RGS2
																														ENSG00000008394	MGST1	0.160026	ENSG00000188641	DPYD	0.23754	ENSG00000130449	ZSWIM6	0.431043	ENSG00000136867	SLC31A2	0.287608	ENSG00000162923	WDR26	0.883796	ENSG00000131508	UBE2D2	0.562093	ENSG00000106066	CPVL
																														ENSG00000138029	HADHB	0.159989	ENSG00000136051	WASHC4	0.235711	ENSG00000075420	FNDC3B	0.431043	ENSG00000059804	SLC2A3	0.287608	ENSG00000144746	ARL6IP5	0.876416	ENSG00000114902	SPCS1	0.562093	ENSG00000092010	PSME1
																														ENSG00000157873	TNFRSF14	0.159883	ENSG00000197629	MPEG1	0.235537	ENSG00000134717	BTF3L4	0.431043	ENSG00000073921	PICALM	0.287608	ENSG00000101109	STK4	0.8723	ENSG00000173726	TOMM20	0.562093	ENSG00000186184	POLR1D
																														ENSG00000152795	HNRNPDL	0.15958	ENSG00000003056	M6PR	0.234793	ENSG00000065615	CYB5R4	0.427291	ENSG00000134109	EDEM1	0.287608	ENSG00000168653	NDUFS5	0.8723	ENSG00000158710	TAGLN2	0.562093	ENSG00000146386	ABRACL
																														ENSG00000138385	SSB	0.158873	ENSG00000151694	ADAM17	0.234677	ENSG00000125810	CD93	0.427291	ENSG00000117505	DR1	0.287608	ENSG00000230989	HSBP1	0.867854	ENSG00000112081	SRSF3	0.552755	ENSG00000159256	MORC3
																														ENSG00000196230	TUBB	0.158082	ENSG00000177885	GRB2	0.234677	ENSG00000127528	KLF2	0.426489	ENSG00000186818	LILRB4	0.287608	ENSG00000143669	LYST	0.867854	ENSG00000124172	ATP5F1E	0.552086	ENSG00000076928	ARHGEF1
																														ENSG00000125304	TM9SF2	0.15778	ENSG00000171867	PRNP	0.234528	ENSG00000239998	LILRA2	0.424123	ENSG00000171634	BPTF	0.287608	ENSG00000117523	PRRC2C	0.867854	ENSG00000232112	TMA7	0.550411	ENSG00000025293	PHF20
																														ENSG00000053254	FOXN3	0.157634	ENSG00000131871	SELENOS	0.234048	ENSG00000179583	CIITA	0.424123	ENSG00000141027	NCOR1	0.287608	ENSG00000132424	PNISR	0.857801	ENSG00000129559	NEDD8	0.546496	ENSG00000139679	LPAR6
																														ENSG00000119707	RBM25	0.157212	ENSG00000112576	CCND3	0.234048	ENSG00000135829	DHX9	0.424123	ENSG00000166275	BORCS7	0.287608	ENSG00000177989	ODF3B	0.857801	ENSG00000089248	ERP29	0.546496	ENSG00000147894	C9orf72
																														ENSG00000100796	PPP4R3A	0.156917	ENSG00000075415	SLC25A3	0.233515	ENSG00000269893	SNHG8	0.423091	ENSG00000065615	CYB5R4	0.287608	ENSG00000125970	RALY	0.857801	ENSG00000134825	TMEM258	0.546496	ENSG00000129292	PHF20L1
																														ENSG00000140836	ZFHX3	0.156811	ENSG00000168259	DNAJC7	0.233515	ENSG00000084754	HADHA	0.423091	ENSG00000204397	CARD16	0.287608	ENSG00000153815	CMIP	0.857801	ENSG00000005022	SLC25A5	0.546496	ENSG00000102007	PLP2
																														ENSG00000170906	NDUFA3	0.156515	ENSG00000142657	PGD	0.233515	ENSG00000156256	USP16	0.422272	ENSG00000135046	ANXA1	0.283046	ENSG00000140992	PDPK1	0.857801	ENSG00000145425	RPS3A	0.544332	ENSG00000197343	ZNF655
																														ENSG00000161547	SRSF2	0.155994	ENSG00000184076	UQCR10	0.232042	ENSG00000203747	FCGR3A	0.421608	ENSG00000185262	UBALD2	0.281508	ENSG00000103642	LACTB	0.857801	ENSG00000163220	S100A9	0.541148	ENSG00000198585	NUDT16
																														ENSG00000119318	RAD23B	0.155594	ENSG00000160551	TAOK1	0.231474	ENSG00000184922	FMNL1	0.421414	ENSG00000117335	CD46	0.281508	ENSG00000139168	ZCRB1	0.857801	ENSG00000169429	CXCL8	0.53951	ENSG00000144655	CSRNP1
																														ENSG00000131171	SH3BGRL	0.155441	ENSG00000116473	RAP1A	0.231474	ENSG00000265972	TXNIP	0.421193	ENSG00000123416	TUBA1B	0.280449	ENSG00000059804	SLC2A3	0.857801	ENSG00000011600	TYROBP	0.534687	ENSG00000153250	RBMS1
																														ENSG00000168264	IRF2BP2	0.155087	ENSG00000112245	PTP4A1	0.230902	ENSG00000135655	USP15	0.415218	ENSG00000163939	PBRM1	0.279703	ENSG00000138185	ENTPD1	0.857801	ENSG00000163041	H3F3A	0.527145	ENSG00000116679	IVNS1ABP
																														ENSG00000172936	MYD88	0.154688	ENSG00000123609	NMI	0.230595	ENSG00000166295	ANAPC16	0.415218	ENSG00000039319	ZFYVE16	0.279147	ENSG00000149177	PTPRJ	0.857801	ENSG00000114391	RPL24	0.521185	ENSG00000067334	DNTTIP2
																														ENSG00000086300	SNX10	0.154538	ENSG00000128524	ATP6V1F	0.230508	ENSG00000113070	HBEGF	0.415218	ENSG00000124151	NCOA3	0.278838	ENSG00000119396	RAB14	0.857801	ENSG00000105373	NOP53	0.514787	ENSG00000178719	GRINA
																														ENSG00000131238	PPT1	0.154067	ENSG00000125304	TM9SF2	0.230272	ENSG00000183291	SELENOF	0.415218	ENSG00000128245	YWHAH	0.277761	ENSG00000168300	PCMTD1	0.857801	ENSG00000108953	YWHAE	0.514787	ENSG00000147010	SH3KBP1
																														ENSG00000197405	C5AR1	0.153991	ENSG00000108256	NUFIP2	0.229575	ENSG00000152229	PSTPIP2	0.415218	ENSG00000107262	BAG1	0.276882	ENSG00000184216	IRAK1	0.857801	ENSG00000198848	CES1	0.514787	ENSG00000198840	MT-ND3
																														ENSG00000185825	BCAP31	0.153625	ENSG00000107551	RASSF4	0.22912	ENSG00000071054	MAP4K4	0.415218	ENSG00000099624	ATP5F1D	0.27533	ENSG00000122122	SASH3	0.857801	ENSG00000161642	ZNF385A	0.514787	ENSG00000152518	ZFP36L2
																														ENSG00000197448	GSTK1	0.152829	ENSG00000172795	DCP2	0.22912	ENSG00000115232	ITGA4	0.415218	ENSG00000067066	SP100	0.275225	ENSG00000169895	SYAP1	0.857801	ENSG00000166340	TPP1	0.514787	ENSG00000025708	TYMP
																														ENSG00000127540	UQCR11	0.15257	ENSG00000198755	RPL10A	0.228593	ENSG00000110955	ATP5F1B	0.413754	ENSG00000167470	MIDN	0.274552	ENSG00000243317	STMP1	0.857801	ENSG00000118689	FOXO3	0.514787	ENSG00000102524	TNFSF13B
																														ENSG00000140678	ITGAX	0.15246	ENSG00000135506	OS9	0.227934	ENSG00000177556	ATOX1	0.412644	ENSG00000109787	KLF3	0.274552	ENSG00000146112	PPP1R18	0.857801	ENSG00000131389	SLC6A6	0.514787	ENSG00000111144	LTA4H
																														ENSG00000113648	H2AFY	0.152269	ENSG00000253729	PRKDC	0.226959	ENSG00000142669	SH3BGRL3	0.412433	ENSG00000110852	CLEC2B	0.274373	ENSG00000113282	CLINT1	0.857801	ENSG00000116473	RAP1A	0.514787	ENSG00000171988	JMJD1C
																														ENSG00000136436	CALCOCO2	0.151669	ENSG00000140836	ZFHX3	0.225853	ENSG00000173744	AGFG1	0.411523	ENSG00000142864	SERBP1	0.273901	ENSG00000151726	ACSL1	0.857801	ENSG00000116754	SRSF11	0.514787	ENSG00000068697	LAPTM4A
																														ENSG00000131174	COX7B	0.151599	ENSG00000063046	EIF4B	0.225451	ENSG00000035687	ADSS	0.411523	ENSG00000103811	CTSH	0.273803	ENSG00000170802	FOXN2	0.857801	ENSG00000185215	TNFAIP2	0.514787	ENSG00000100028	SNRPD3
																														ENSG00000169230	PRELID1	0.151457	ENSG00000204592	HLA-E	0.225303	ENSG00000135821	GLUL	0.410896	ENSG00000164096	C4orf3	0.273478	ENSG00000177868	SVBP	0.857801	ENSG00000010404	IDS	0.514787	ENSG00000130724	CHMP2A
																														ENSG00000116350	SRSF4	0.151297	ENSG00000108953	YWHAE	0.225069	ENSG00000023734	STRAP	0.410495	ENSG00000005893	LAMP2	0.272502	ENSG00000140307	GTF2A2	0.857801	ENSG00000112308	C6orf62	0.514787	ENSG00000118363	SPCS2
																														ENSG00000026297	RNASET2	0.150909	ENSG00000134851	TMEM165	0.224588	ENSG00000018280	SLC11A1	0.410142	ENSG00000083937	CHMP2B	0.272012	ENSG00000092964	DPYSL2	0.857801	ENSG00000101596	SMCHD1	0.514787	ENSG00000005893	LAMP2
																														ENSG00000100353	EIF3D	0.150858	ENSG00000132334	PTPRE	0.224483	ENSG00000168259	DNAJC7	0.408675	ENSG00000143110	C1orf162	0.271708	ENSG00000254087	LYN	0.850881	ENSG00000135390	ATP5MC2	0.514787	ENSG00000136279	DBNL
																														ENSG00000168028	RPSA	0.150805	ENSG00000182774	RPS17	0.223548	ENSG00000197405	C5AR1	0.408675	ENSG00000197956	S100A6	0.271522	ENSG00000121858	TNFSF10	0.845828	ENSG00000196683	TOMM7	0.514787	ENSG00000131507	NDFIP1
																														ENSG00000110880	CORO1C	0.1503	ENSG00000078140	UBE2K	0.223127	ENSG00000198840	MT-ND3	0.408363	ENSG00000072506	HSD17B10	0.27093	ENSG00000101972	STAG2	0.838942	ENSG00000142669	SH3BGRL3	0.507072	ENSG00000196776	CD47
																														ENSG00000106780	MEGF9	0.150245	ENSG00000197451	HNRNPAB	0.223127	ENSG00000135441	BLOC1S1	0.407482	ENSG00000198160	MIER1	0.27033	ENSG00000234545	FAM133B	0.838942	ENSG00000100650	SRSF5	0.502714	ENSG00000125107	CNOT1
																														ENSG00000162191	UBXN1	0.149949	ENSG00000136167	LCP1	0.222941	ENSG00000130779	CLIP1	0.407113	ENSG00000242574	HLA-DMB	0.269797	ENSG00000072786	STK10	0.838942	ENSG00000132475	H3F3B	0.501612	ENSG00000104164	BLOC1S6
																														ENSG00000034152	MAP2K3	0.149645	ENSG00000231925	TAPBP	0.222258	ENSG00000153179	RASSF3	0.407113	ENSG00000141682	PMAIP1	0.269687	ENSG00000071127	WDR1	0.838942	ENSG00000092841	MYL6	0.500288	ENSG00000165525	NEMF
																														ENSG00000104205	SGK3	0.149001	ENSG00000167658	EEF2	0.221555	ENSG00000198818	SFT2D1	0.407113	ENSG00000120992	LYPLA1	0.269687	ENSG00000170860	LSM3	0.838942	ENSG00000129226	CD68	0.495422	ENSG00000120686	UFM1
																														ENSG00000049245	VAMP3	0.148758	ENSG00000153113	CAST	0.221526	ENSG00000213523	SRA1	0.407113	ENSG00000221963	APOL6	0.269687	ENSG00000102879	CORO1A	0.831328	ENSG00000196531	NACA	0.483855	ENSG00000111252	SH2B3
																														ENSG00000162368	CMPK1	0.14818	ENSG00000126860	EVI2A	0.221421	ENSG00000065911	MTHFD2	0.407113	ENSG00000108100	CCNY	0.267709	ENSG00000147649	MTDH	0.831328	ENSG00000147403	RPL10	0.482366	ENSG00000137486	ARRB1
																														ENSG00000112701	SENP6	0.146537	ENSG00000187840	EIF4EBP1	0.220879	ENSG00000020633	RUNX3	0.407113	ENSG00000177410	ZFAS1	0.267374	ENSG00000106066	CPVL	0.831328	ENSG00000101160	CTSZ	0.482366	ENSG00000182196	ARL6IP4
																														ENSG00000106400	ZNHIT1	0.14584	ENSG00000109320	NFKB1	0.220455	ENSG00000117335	CD46	0.40457	ENSG00000111144	LTA4H	0.267144	ENSG00000139278	GLIPR1	0.824634	ENSG00000140749	IGSF6	0.482366	ENSG00000091527	CDV3
																														ENSG00000166710	B2M	0.145762	ENSG00000091164	TXNL1	0.219083	ENSG00000101654	RNMT	0.40457	ENSG00000104763	ASAH1	0.266998	ENSG00000115286	NDUFS7	0.813406	ENSG00000124731	TREM1	0.482366	ENSG00000127951	FGL2
																														ENSG00000105835	NAMPT	0.145605	ENSG00000179583	CIITA	0.219083	ENSG00000100055	CYTH4	0.401755	ENSG00000144848	ATG3	0.266909	ENSG00000168610	STAT3	0.813406	ENSG00000084754	HADHA	0.482366	ENSG00000070756	PABPC1
																														ENSG00000166801	FAM111A	0.145451	ENSG00000144802	NFKBIZ	0.219029	ENSG00000139505	MTMR6	0.401755	ENSG00000107099	DOCK8	0.266547	ENSG00000185862	EVI2B	0.813406	ENSG00000143384	MCL1	0.480022	ENSG00000149932	TMEM219
																														ENSG00000169020	ATP5ME	0.145205	ENSG00000173915	ATP5MD	0.218994	ENSG00000110717	NDUFS8	0.401755	ENSG00000178980	SELENOW	0.265913	ENSG00000142507	PSMB6	0.813406	ENSG00000205542	TMSB4X	0.479116	ENSG00000197405	C5AR1
																														ENSG00000164190	NIPBL	0.145148	ENSG00000113269	RNF130	0.218953	ENSG00000072501	SMC1A	0.401755	ENSG00000103152	MPG	0.265913	ENSG00000068305	MEF2A	0.813406	ENSG00000130522	JUND	0.476891	ENSG00000152291	TGOLN2
																														ENSG00000171222	SCAND1	0.145112	ENSG00000034152	MAP2K3	0.218486	ENSG00000003756	RBM5	0.401755	ENSG00000026025	VIM	0.265649	ENSG00000178719	GRINA	0.813406	ENSG00000173821	RNF213	0.475793	ENSG00000071082	RPL31
																														ENSG00000147649	MTDH	0.14472	ENSG00000092820	EZR	0.218486	ENSG00000162704	ARPC5	0.399983	ENSG00000114439	BBX	0.263762	ENSG00000168438	CDC40	0.813406	ENSG00000133112	TPT1	0.47314	ENSG00000223865	HLA-DPB1
																														ENSG00000143543	JTB	0.144473	ENSG00000090863	GLG1	0.216975	ENSG00000125740	FOSB	0.398532	ENSG00000053371	AKR7A2	0.262946	ENSG00000135334	AKIRIN2	0.813406	ENSG00000177954	RPS27	0.466721	ENSG00000183486	MX2
																														ENSG00000205269	TMEM170B	0.144268	ENSG00000198804	MT-CO1	0.216524	ENSG00000134905	CARS2	0.39511	ENSG00000159840	ZYX	0.262073	ENSG00000153914	SREK1	0.813406	ENSG00000168036	CTNNB1	0.465878	ENSG00000105383	CD33
																														ENSG00000108256	NUFIP2	0.144119	ENSG00000110321	EIF4G2	0.214532	ENSG00000159069	FBXW5	0.39511	ENSG00000136758	YME1L1	0.26168	ENSG00000179921	GPBAR1	0.813406	ENSG00000141298	SSH2	0.465878	ENSG00000088930	XRN2
																														ENSG00000124783	SSR1	0.144114	ENSG00000258289	CHURC1	0.214255	ENSG00000173889	PHC3	0.39511	ENSG00000162385	MAGOH	0.261519	ENSG00000184588	PDE4B	0.813406	ENSG00000169926	KLF13	0.465878	ENSG00000186395	KRT10
																														ENSG00000132963	POMP	0.143907	ENSG00000012779	ALOX5	0.214003	ENSG00000198805	PNP	0.393844	ENSG00000117614	SYF2	0.261274	ENSG00000125944	HNRNPR	0.813406	ENSG00000078304	PPP2R5C	0.465878	ENSG00000066654	THUMPD1
																														ENSG00000163939	PBRM1	0.143343	ENSG00000159199	ATP5MC1	0.211738	ENSG00000176978	DPP7	0.393844	ENSG00000154518	ATP5MC3	0.261088	ENSG00000166337	TAF10	0.813406	ENSG00000198604	BAZ1A	0.465878	ENSG00000180776	ZDHHC20
																														ENSG00000115977	AAK1	0.143245	ENSG00000198938	MT-CO3	0.21164	ENSG00000165097	KDM1B	0.392908	ENSG00000136167	LCP1	0.260552	ENSG00000115415	STAT1	0.813406	ENSG00000003056	M6PR	0.465878	ENSG00000147872	PLIN2
																														ENSG00000241837	ATP5PO	0.143126	ENSG00000169429	CXCL8	0.211187	ENSG00000048828	FAM120A	0.392908	ENSG00000141551	CSNK1D	0.260128	ENSG00000084070	SMAP2	0.813406	ENSG00000023191	RNH1	0.465878	ENSG00000080503	SMARCA2
																														ENSG00000184014	DENND5A	0.142917	ENSG00000145337	PYURF	0.211098	ENSG00000176463	SLCO3A1	0.392187	ENSG00000072778	ACADVL	0.256244	ENSG00000158195	WASF2	0.790686	ENSG00000106829	TLE4	0.465878	ENSG00000009790	TRAF3IP3
																														ENSG00000145675	PIK3R1	0.141838	ENSG00000126247	CAPNS1	0.21028	ENSG00000156052	GNAQ	0.390765	ENSG00000168172	HOOK3	0.256038	ENSG00000101782	RIOK3	0.790686	ENSG00000106400	ZNHIT1	0.465878	ENSG00000188042	ARL4C
																														ENSG00000241553	ARPC4	0.141642	ENSG00000112096	SOD2	0.209856	ENSG00000166598	HSP90B1	0.388597	ENSG00000163453	IGFBP7	0.256038	ENSG00000008952	SEC62	0.790686	ENSG00000118855	MFSD1	0.465878	ENSG00000158710	TAGLN2
																														ENSG00000113742	CPEB4	0.140956	ENSG00000155926	SLA	0.208513	ENSG00000122034	GTF3A	0.386649	ENSG00000171522	PTGER4	0.255963	ENSG00000114902	SPCS1	0.790686	ENSG00000144579	CTDSP1	0.465878	ENSG00000152818	UTRN
																														ENSG00000189266	PNRC2	0.140769	ENSG00000172809	RPL38	0.207655	ENSG00000005844	ITGAL	0.386649	ENSG00000150540	HNMT	0.255187	ENSG00000158417	EIF5B	0.790686	ENSG00000115234	SNX17	0.465878	ENSG00000187608	ISG15
																														ENSG00000095787	WAC	0.140601	ENSG00000160213	CSTB	0.207059	ENSG00000072786	STK10	0.386649	ENSG00000108424	KPNB1	0.255187	ENSG00000123143	PKN1	0.776881	ENSG00000126264	HCST	0.465878	ENSG00000111011	RSRC2
																														ENSG00000102007	PLP2	0.140332	ENSG00000169564	PCBP1	0.206921	ENSG00000023318	ERP44	0.386649	ENSG00000148362	PAXX	0.254288	ENSG00000167851	CD300A	0.776881	ENSG00000170776	AKAP13	0.465878	ENSG00000112137	PHACTR1
																														ENSG00000258289	CHURC1	0.139842	ENSG00000102524	TNFSF13B	0.206771	ENSG00000136026	CKAP4	0.386649	ENSG00000184787	UBE2G2	0.254056	ENSG00000140740	UQCRC2	0.776881	ENSG00000021355	SERPINB1	0.458753	ENSG00000204287	HLA-DRA
																														ENSG00000123416	TUBA1B	0.13964	ENSG00000086730	LAT2	0.206707	ENSG00000048649	RSF1	0.386649	ENSG00000111913	RIPOR2	0.253661	ENSG00000111142	METAP2	0.776881	ENSG00000122026	RPL21	0.456435	ENSG00000155463	OXA1L
																														ENSG00000100697	DICER1	0.139317	ENSG00000018280	SLC11A1	0.205897	ENSG00000104660	LEPROTL1	0.386649	ENSG00000242372	EIF6	0.253198	ENSG00000133858	ZFC3H1	0.776881	ENSG00000102524	TNFSF13B	0.455894	ENSG00000165025	SYK
																														ENSG00000169826	CSGALNACT2	0.139302	ENSG00000213064	SFT2D2	0.204347	ENSG00000181163	NPM1	0.381987	ENSG00000143420	ENSA	0.252203	ENSG00000111716	LDHB	0.776881	ENSG00000042753	AP2S1	0.449199	ENSG00000112739	PRPF4B
																														ENSG00000170275	CRTAP	0.13917	ENSG00000100911	PSME2	0.2033	ENSG00000172936	MYD88	0.381987	ENSG00000168036	CTNNB1	0.251849	ENSG00000074201	CLNS1A	0.776881	ENSG00000265681	RPL17	0.449199	ENSG00000143771	CNIH4
																														ENSG00000128016	ZFP36	0.138794	ENSG00000158050	DUSP2	0.203112	ENSG00000117500	TMED5	0.381987	ENSG00000131236	CAP1	0.25161	ENSG00000187239	FNBP1	0.776881	ENSG00000132205	EMILIN2	0.449199	ENSG00000133872	SARAF
																														ENSG00000106682	EIF4H	0.137608	ENSG00000125970	RALY	0.202517	ENSG00000110057	UNC93B1	0.381487	ENSG00000114867	EIF4G1	0.251539	ENSG00000095380	NANS	0.776881	ENSG00000123384	LRP1	0.449199	ENSG00000137076	TLN1
																														ENSG00000183291	SELENOF	0.137608	ENSG00000168710	AHCYL1	0.202517	ENSG00000112531	QKI	0.380866	ENSG00000164405	UQCRQ	0.251345	ENSG00000086065	CHMP5	0.776881	ENSG00000122694	GLIPR2	0.449199	ENSG00000097033	SH3GLB1
																														ENSG00000101109	STK4	0.13639	ENSG00000109180	OCIAD1	0.201868	ENSG00000035403	VCL	0.380076	ENSG00000136240	KDELR2	0.251083	ENSG00000163683	SMIM14	0.776881	ENSG00000068697	LAPTM4A	0.449199	ENSG00000092964	DPYSL2
																														ENSG00000142669	SH3BGRL3	0.136086	ENSG00000165732	DDX21	0.201868	ENSG00000065135	GNAI3	0.379594	ENSG00000118515	SGK1	0.251046	ENSG00000179010	MRFAP1	0.776881	ENSG00000143119	CD53	0.449199	ENSG00000173436	MINOS1
																														ENSG00000184203	PPP1R2	0.135932	ENSG00000112773	TENT5A	0.201251	ENSG00000228300	C19orf24	0.379035	ENSG00000167863	ATP5PD	0.250519	ENSG00000115234	SNX17	0.776881	ENSG00000147649	MTDH	0.440787	ENSG00000136436	CALCOCO2
																														ENSG00000136754	ABI1	0.135777	ENSG00000179010	MRFAP1	0.201251	ENSG00000144635	DYNC1LI1	0.379035	ENSG00000003056	M6PR	0.250134	ENSG00000143815	LBR	0.776881	ENSG00000188641	DPYD	0.440787	ENSG00000173193	PARP14
																														ENSG00000107099	DOCK8	0.135702	ENSG00000133657	ATP13A3	0.199792	ENSG00000135968	GCC2	0.379035	ENSG00000111897	SERINC1	0.24808	ENSG00000162368	CMPK1	0.776881	ENSG00000110700	RPS13	0.439297	ENSG00000150681	RGS18
																														ENSG00000120129	DUSP1	0.135436	ENSG00000156261	CCT8	0.199053	ENSG00000104093	DMXL2	0.378137	ENSG00000110958	PTGES3	0.247642	ENSG00000188186	LAMTOR4	0.776881	ENSG00000173660	UQCRH	0.435716	ENSG00000135821	GLUL
																														ENSG00000065135	GNAI3	0.135282	ENSG00000116288	PARK7	0.198248	ENSG00000057608	GDI2	0.37801	ENSG00000030582	GRN	0.247077	ENSG00000183283	DAZAP2	0.770338	ENSG00000130066	SAT1	0.433867	ENSG00000153113	CAST
																														ENSG00000077380	DYNC1I2	0.134952	ENSG00000127951	FGL2	0.19594	ENSG00000174718	KIAA1551	0.376664	ENSG00000112701	SENP6	0.246966	ENSG00000113558	SKP1	0.767603	ENSG00000251562	MALAT1	0.431238	ENSG00000198886	MT-ND4
																														ENSG00000184557	SOCS3	0.134538	ENSG00000119632	IFI27L2	0.195646	ENSG00000119900	OGFRL1	0.374576	ENSG00000114861	FOXP1	0.246966	ENSG00000138670	RASGEF1B	0.767603	ENSG00000108654	DDX5	0.428076	ENSG00000144746	ARL6IP5
																														ENSG00000165527	ARF6	0.134507	ENSG00000126756	UXT	0.195442	ENSG00000131495	NDUFA2	0.372149	ENSG00000172586	CHCHD1	0.246268	ENSG00000100393	EP300	0.760939	ENSG00000152234	ATP5F1A	0.415252	ENSG00000140575	IQGAP1
																														ENSG00000080371	RAB21	0.133541	ENSG00000091317	CMTM6	0.194949	ENSG00000112739	PRPF4B	0.372149	ENSG00000115539	PDCL3	0.246268	ENSG00000182944	EWSR1	0.760939	ENSG00000184922	FMNL1	0.415252	ENSG00000198898	CAPZA2
																														ENSG00000239998	LILRA2	0.133068	ENSG00000186432	KPNA4	0.194144	ENSG00000125037	EMC3	0.372149	ENSG00000099331	MYO9B	0.244795	ENSG00000130748	TMEM160	0.760939	ENSG00000155957	TMBIM4	0.415252	ENSG00000005810	MYCBP2
																														ENSG00000129515	SNX6	0.132998	ENSG00000116754	SRSF11	0.1921	ENSG00000134644	PUM1	0.372149	ENSG00000148700	ADD3	0.244795	ENSG00000141504	SAT2	0.760939	ENSG00000146066	HIGD2A	0.415252	ENSG00000219200	RNASEK
																														ENSG00000149311	ATM	0.13285	ENSG00000143198	MGST3	0.1921	ENSG00000163221	S100A12	0.370529	ENSG00000162976	PQLC3	0.244795	ENSG00000069329	VPS35	0.760939	ENSG00000145741	BTF3	0.415252	ENSG00000158717	RNF166
																														ENSG00000168172	HOOK3	0.132068	ENSG00000185624	P4HB	0.191632	ENSG00000107581	EIF3A	0.370301	ENSG00000123684	LPGAT1	0.24454	ENSG00000083896	YTHDC1	0.760939	ENSG00000164111	ANXA5	0.415252	ENSG00000139433	GLTP
																														ENSG00000124762	CDKN1A	0.130972	ENSG00000175567	UCP2	0.19144	ENSG00000100523	DDHD1	0.369575	ENSG00000117091	CD48	0.243461	ENSG00000038219	BOD1L1	0.760939	ENSG00000059728	MXD1	0.415252	ENSG00000167770	OTUB1
																														ENSG00000159658	EFCAB14	0.130729	ENSG00000140931	CMTM3	0.191335	ENSG00000110442	COMMD9	0.369575	ENSG00000121410	A1BG	0.243214	ENSG00000138085	ATRAID	0.760939	ENSG00000085265	FCN1	0.415252	ENSG00000177409	SAMD9L
																														ENSG00000010810	FYN	0.129911	ENSG00000130066	SAT1	0.190824	ENSG00000163848	ZNF148	0.369575	ENSG00000136104	RNASEH2B	0.243214	ENSG00000104763	ASAH1	0.755921	ENSG00000160888	IER2	0.41056	ENSG00000164615	CAMLG
																														ENSG00000130313	PGLS	0.128932	ENSG00000155090	KLF10	0.190774	ENSG00000152291	TGOLN2	0.368169	ENSG00000062716	VMP1	0.242284	ENSG00000116171	SCP2	0.752006	ENSG00000070756	PABPC1	0.406639	ENSG00000169714	CNBP
																														ENSG00000112308	C6orf62	0.128604	ENSG00000005844	ITGAL	0.190641	ENSG00000108100	CCNY	0.367912	ENSG00000137642	SORL1	0.241512	ENSG00000143119	CD53	0.748866	ENSG00000152518	ZFP36L2	0.400455	ENSG00000115762	PLEKHB2
																														ENSG00000135506	OS9	0.128294	ENSG00000163320	CGGBP1	0.190641	ENSG00000260032	NORAD	0.36754	ENSG00000153006	SREK1IP1	0.241512	ENSG00000198840	MT-ND3	0.746416	ENSG00000135404	CD63	0.389256	ENSG00000168906	MAT2A
																														ENSG00000167088	SNRPD1	0.127395	ENSG00000119013	NDUFB3	0.190008	ENSG00000175602	CCDC85B	0.36589	ENSG00000134375	TIMM17A	0.241512	ENSG00000128272	ATF4	0.746292	ENSG00000109971	HSPA8	0.389256	ENSG00000158864	NDUFS2
																														ENSG00000158195	WASF2	0.127395	ENSG00000164733	CTSB	0.189858	ENSG00000108179	PPIF	0.36589	ENSG00000142168	SOD1	0.241315	ENSG00000115310	RTN4	0.742323	ENSG00000137076	TLN1	0.389256	ENSG00000115956	PLEK
																														ENSG00000132510	KDM6B	0.126652	ENSG00000092199	HNRNPC	0.189686	ENSG00000178695	KCTD12	0.364953	ENSG00000177885	GRB2	0.240465	ENSG00000100906	NFKBIA	0.728074	ENSG00000135535	CD164	0.389256	ENSG00000245532	NEAT1
																														ENSG00000100077	GRK3	0.126564	ENSG00000073756	PTGS2	0.18953	ENSG00000113648	H2AFY	0.364281	ENSG00000175416	CLTB	0.239912	ENSG00000100242	SUN2	0.720297	ENSG00000234745	HLA-B	0.385109	ENSG00000104093	DMXL2
																														ENSG00000134644	PUM1	0.126019	ENSG00000166710	B2M	0.189482	ENSG00000011304	PTBP1	0.363379	ENSG00000175602	CCDC85B	0.239147	ENSG00000170909	OSCAR	0.720297	ENSG00000142937	RPS8	0.381251	ENSG00000177885	GRB2
																														ENSG00000165637	VDAC2	0.125999	ENSG00000139218	SCAF11	0.188406	ENSG00000119707	RBM25	0.363379	ENSG00000092841	MYL6	0.238228	ENSG00000104805	NUCB1	0.720297	ENSG00000183688	RFLNB	0.380486	ENSG00000130748	TMEM160
																														ENSG00000138757	G3BP2	0.125791	ENSG00000156515	HK1	0.186601	ENSG00000177565	TBL1XR1	0.362401	ENSG00000138166	DUSP5	0.237978	ENSG00000105176	URI1	0.720297	ENSG00000173020	GRK2	0.380486	ENSG00000091164	TXNL1
																														ENSG00000114978	MOB1A	0.125303	ENSG00000044115	CTNNA1	0.186114	ENSG00000163634	THOC7	0.362401	ENSG00000143119	CD53	0.237354	ENSG00000169021	UQCRFS1	0.720297	ENSG00000143549	TPM3	0.377284	ENSG00000140836	ZFHX3
																														ENSG00000103035	PSMD7	0.125204	ENSG00000277791	PSMB3	0.185932	ENSG00000134108	ARL8B	0.362401	ENSG00000228253	MT-ATP8	0.237303	ENSG00000196684	HSH2D	0.720297	ENSG00000104904	OAZ1	0.368301	ENSG00000174780	SRP72
																														ENSG00000117335	CD46	0.124912	ENSG00000101265	RASSF2	0.185814	ENSG00000170759	KIF5B	0.361178	ENSG00000130303	BST2	0.235769	ENSG00000129355	CDKN2D	0.720297	ENSG00000042493	CAPG	0.362784	ENSG00000134717	BTF3L4
																														ENSG00000146676	PURB	0.124858	ENSG00000112701	SENP6	0.185671	ENSG00000165025	SYK	0.360176	ENSG00000115271	GCA	0.235769	ENSG00000101294	HM13	0.720297	ENSG00000083845	RPS5	0.356835	ENSG00000170873	MTSS1
																														ENSG00000166136	NDUFB8	0.124644	ENSG00000156976	EIF4A2	0.184895	ENSG00000131051	RBM39	0.359604	ENSG00000174695	TMEM167A	0.23552	ENSG00000141574	SECTM1	0.720297	ENSG00000125810	CD93	0.352058	ENSG00000131238	PPT1
																														ENSG00000143420	ENSA	0.124575	ENSG00000273338	AC103591.3	0.183589	ENSG00000130748	TMEM160	0.358634	ENSG00000105258	POLR2I	0.235141	ENSG00000141522	ARHGDIA	0.720297	ENSG00000185201	IFITM2	0.352058	ENSG00000164733	CTSB
																														ENSG00000143110	C1orf162	0.123746	ENSG00000120533	ENY2	0.182323	ENSG00000124126	PREX1	0.358634	ENSG00000122025	FLT3	0.235141	ENSG00000087191	PSMC5	0.720297	ENSG00000127951	FGL2	0.3504	ENSG00000126756	UXT
																														ENSG00000107290	SETX	0.123502	ENSG00000168028	RPSA	0.181812	ENSG00000243449	C4orf48	0.35822	ENSG00000143621	ILF2	0.234867	ENSG00000168259	DNAJC7	0.720297	ENSG00000038427	VCAN	0.34643	ENSG00000197111	PCBP2
																														ENSG00000163902	RPN1	0.122178	ENSG00000120071	KANSL1	0.181608	ENSG00000140105	WARS	0.357129	ENSG00000164615	CAMLG	0.23466	ENSG00000170310	STX8	0.720297	ENSG00000107738	VSIR	0.344862	ENSG00000159199	ATP5MC1
																														ENSG00000149932	TMEM219	0.121914	ENSG00000107581	EIF3A	0.181118	ENSG00000139679	LPAR6	0.355952	ENSG00000165312	OTUD1	0.233161	ENSG00000174231	PRPF8	0.720297	ENSG00000170144	HNRNPA3	0.344862	ENSG00000170776	AKAP13
																														ENSG00000117500	TMED5	0.12182	ENSG00000186395	KRT10	0.180711	ENSG00000119979	FAM45A	0.35494	ENSG00000100077	GRK3	0.233161	ENSG00000103335	PIEZO1	0.720297	ENSG00000183172	SMDT1	0.344862	ENSG00000136104	RNASEH2B
																														ENSG00000136521	NDUFB5	0.121038	ENSG00000188529	SRSF10	0.180533	ENSG00000070961	ATP2B1	0.35494	ENSG00000033800	PIAS1	0.233161	ENSG00000103363	ELOB	0.720297	ENSG00000130303	BST2	0.344862	ENSG00000035403	VCL
																														ENSG00000008018	PSMB1	0.120725	ENSG00000124570	SERPINB6	0.180075	ENSG00000181467	RAP2B	0.352297	ENSG00000234545	FAM133B	0.232113	ENSG00000140526	ABHD2	0.720297	ENSG00000109046	WSB1	0.344862	ENSG00000136869	TLR4
																														ENSG00000100823	APEX1	0.120305	ENSG00000186298	PPP1CC	0.179822	ENSG00000092820	EZR	0.350123	ENSG00000074800	ENO1	0.231285	ENSG00000197102	DYNC1H1	0.720297	ENSG00000120802	TMPO	0.344862	ENSG00000231925	TAPBP
																														ENSG00000113163	COL4A3BP	0.120305	ENSG00000123505	AMD1	0.179317	ENSG00000112697	TMEM30A	0.350123	ENSG00000008294	SPAG9	0.230275	ENSG00000089053	ANAPC5	0.720297	ENSG00000106803	SEC61B	0.344862	ENSG00000120705	ETF1
																														ENSG00000144597	EAF1	0.120305	ENSG00000140455	USP3	0.178875	ENSG00000090061	CCNK	0.350123	ENSG00000119632	IFI27L2	0.229576	ENSG00000196850	PPTC7	0.720297	ENSG00000118508	RAB32	0.344862	ENSG00000068305	MEF2A
																														ENSG00000165119	HNRNPK	0.119736	ENSG00000134294	SLC38A2	0.177859	ENSG00000005059	MCUB	0.350123	ENSG00000080371	RAB21	0.229394	ENSG00000139180	NDUFA9	0.720297	ENSG00000071054	MAP4K4	0.344862	ENSG00000121316	PLBD1
																														ENSG00000003756	RBM5	0.119285	ENSG00000071082	RPL31	0.177607	ENSG00000116701	NCF2	0.348752	ENSG00000144746	ARL6IP5	0.228715	ENSG00000136754	ABI1	0.720297	ENSG00000103187	COTL1	0.341251	ENSG00000171862	PTEN
																														ENSG00000183726	TMEM50A	0.119203	ENSG00000172354	GNB2	0.176333	ENSG00000127914	AKAP9	0.347413	ENSG00000167851	CD300A	0.228107	ENSG00000110075	PPP6R3	0.720297	ENSG00000140575	IQGAP1	0.341251	ENSG00000108175	ZMIZ1
																														ENSG00000109046	WSB1	0.118926	ENSG00000139505	MTMR6	0.176333	ENSG00000027697	IFNGR1	0.347413	ENSG00000166136	NDUFB8	0.227308	ENSG00000172500	FIBP	0.720297	ENSG00000196262	PPIA	0.339701	ENSG00000110321	EIF4G2
																														ENSG00000177156	TALDO1	0.118839	ENSG00000198355	PIM3	0.176333	ENSG00000212907	MT-ND4L	0.347346	ENSG00000140749	IGSF6	0.227173	ENSG00000177105	RHOG	0.720297	ENSG00000147677	EIF3H	0.335817	ENSG00000060762	MPC1
																														ENSG00000111142	METAP2	0.118332	ENSG00000196502	SULT1A1	0.176333	ENSG00000155465	SLC7A7	0.344828	ENSG00000136709	WDR33	0.227067	ENSG00000173674	EIF1AX	0.720297	ENSG00000133226	SRRM1	0.335817	ENSG00000100221	JOSD1
																														ENSG00000163931	TKT	0.117988	ENSG00000070190	DAPP1	0.176333	ENSG00000187446	CHP1	0.344828	ENSG00000137752	CASP1	0.226208	ENSG00000233429	HOTAIRM1	0.720297	ENSG00000067560	RHOA	0.330363	ENSG00000108669	CYTH1
																														ENSG00000100354	TNRC6B	0.117479	ENSG00000173120	KDM2A	0.176333	ENSG00000175029	CTBP2	0.344828	ENSG00000185627	PSMD13	0.226208	ENSG00000093144	ECHDC1	0.720297	ENSG00000177885	GRB2	0.330363	ENSG00000197006	METTL9
																														ENSG00000185650	ZFP36L1	0.117269	ENSG00000164754	RAD21	0.176333	ENSG00000100201	DDX17	0.341561	ENSG00000144802	NFKBIZ	0.225386	ENSG00000065615	CYB5R4	0.720297	ENSG00000196924	FLNA	0.324104	ENSG00000114784	EIF1B
																														ENSG00000110876	SELPLG	0.116653	ENSG00000075785	RAB7A	0.176333	ENSG00000130592	LSP1	0.341561	ENSG00000160213	CSTB	0.225252	ENSG00000086589	RBM22	0.720297	ENSG00000143546	S100A8	0.319928	ENSG00000165732	DDX21
																														ENSG00000066336	SPI1	0.116625	ENSG00000015285	WAS	0.176333	ENSG00000082074	FYB1	0.340904	ENSG00000285437	POLR2J3	0.225067	ENSG00000138744	NAAA	0.720297	ENSG00000112096	SOD2	0.319392	ENSG00000173221	GLRX
																														ENSG00000182944	EWSR1	0.116484	ENSG00000265241	RBM8A	0.173654	ENSG00000174917	C19orf70	0.339998	ENSG00000184922	FMNL1	0.225067	ENSG00000087266	SH3BP2	0.720297	ENSG00000206503	HLA-A	0.312441	ENSG00000168610	STAT3
																														ENSG00000140299	BNIP2	0.116378	ENSG00000152518	ZFP36L2	0.172713	ENSG00000110395	CBL	0.339998	ENSG00000111832	RWDD1	0.225067	ENSG00000163950	SLBP	0.720297	ENSG00000123144	TRIR	0.308336	ENSG00000100796	PPP4R3A
																														ENSG00000105379	ETFB	0.116157	ENSG00000162704	ARPC5	0.172439	ENSG00000105835	NAMPT	0.338393	ENSG00000165416	SUGT1	0.22202	ENSG00000163848	ZNF148	0.720297	ENSG00000154518	ATP5MC3	0.308336	ENSG00000163463	KRTCAP2
																														ENSG00000121774	KHDRBS1	0.11594	ENSG00000187735	TCEA1	0.172121	ENSG00000149923	PPP4C	0.337739	ENSG00000145912	NHP2	0.221113	ENSG00000047849	MAP4	0.720297	ENSG00000131051	RBM39	0.308336	ENSG00000204592	HLA-E
																														ENSG00000182831	C16orf72	0.115692	ENSG00000185022	MAFF	0.171532	ENSG00000170525	PFKFB3	0.337739	ENSG00000130592	LSP1	0.22057	ENSG00000168918	INPP5D	0.720297	ENSG00000171988	JMJD1C	0.308336	ENSG00000182578	CSF1R
																														ENSG00000185811	IKZF1	0.115666	ENSG00000149932	TMEM219	0.171171	ENSG00000006125	AP2B1	0.337739	ENSG00000198668	CALM1	0.219044	ENSG00000138430	OLA1	0.720297	ENSG00000168066	SF1	0.308336	ENSG00000133773	CCDC59
																														ENSG00000104824	HNRNPL	0.114426	ENSG00000128699	ORMDL1	0.171039	ENSG00000177731	FLII	0.337739	ENSG00000168961	LGALS9	0.217219	ENSG00000152291	TGOLN2	0.720297	ENSG00000121858	TNFSF10	0.308336	ENSG00000136758	YME1L1
																														ENSG00000010256	UQCRC1	0.114231	ENSG00000117448	AKR1A1	0.171039	ENSG00000187555	USP7	0.337739	ENSG00000160948	VPS28	0.21627	ENSG00000065911	MTHFD2	0.720297	ENSG00000168264	IRF2BP2	0.308336	ENSG00000134250	NOTCH2
																														ENSG00000101745	ANKRD12	0.11395	ENSG00000163931	TKT	0.170946	ENSG00000122122	SASH3	0.337739	ENSG00000099783	HNRNPM	0.216173	ENSG00000197329	PELI1	0.720297	ENSG00000162434	JAK1	0.308336	ENSG00000212907	MT-ND4L
																														ENSG00000163131	CTSS	0.113746	ENSG00000084754	HADHA	0.169522	ENSG00000174720	LARP7	0.337739	ENSG00000139597	N4BP2L1	0.214545	ENSG00000116918	TSNAX	0.720297	ENSG00000163931	TKT	0.308336	ENSG00000110852	CLEC2B
																														ENSG00000165669	FAM204A	0.113641	ENSG00000138385	SSB	0.168953	ENSG00000186010	NDUFA13	0.337739	ENSG00000168300	PCMTD1	0.214545	ENSG00000078618	NRDC	0.720297	ENSG00000125753	VASP	0.285969	ENSG00000115053	NCL
																														ENSG00000198712	MT-CO2	0.113497	ENSG00000118689	FOXO3	0.168065	ENSG00000156675	RAB11FIP1	0.336525	ENSG00000178057	NDUFAF3	0.214545	ENSG00000126709	IFI6	0.720297	ENSG00000101439	CST3	0.285969	ENSG00000125534	PPDPF
																														ENSG00000100030	MAPK1	0.112926	ENSG00000180304	OAZ2	0.16772	ENSG00000164733	CTSB	0.336022	ENSG00000070831	CDC42	0.213336	ENSG00000187109	NAP1L1	0.720297	ENSG00000171314	PGAM1	0.285969	ENSG00000156675	RAB11FIP1
																														ENSG00000105669	COPE	0.112337	ENSG00000142541	RPL13A	0.166789	ENSG00000111669	TPI1	0.335824	ENSG00000117500	TMED5	0.213261	ENSG00000092820	EZR	0.720297	ENSG00000204287	HLA-DRA	0.281985	ENSG00000120708	TGFBI
																														ENSG00000078369	GNB1	0.11181	ENSG00000121858	TNFSF10	0.166485	ENSG00000171298	GAA	0.335574	ENSG00000110696	C11orf58	0.213184	ENSG00000068697	LAPTM4A	0.720297	ENSG00000177663	IL17RA	0.280322	ENSG00000075785	RAB7A
																														ENSG00000183648	NDUFB1	0.111437	ENSG00000158985	CDC42SE2	0.166485	ENSG00000174886	NDUFA11	0.335574	ENSG00000178952	TUFM	0.21313	ENSG00000130066	SAT1	0.711345	ENSG00000005810	MYCBP2	0.280322	ENSG00000114902	SPCS1
																														ENSG00000102317	RBM3	0.111333	ENSG00000184900	SUMO3	0.16462	ENSG00000083799	CYLD	0.334181	ENSG00000151461	UPF2	0.212841	ENSG00000127951	FGL2	0.701761	ENSG00000122877	EGR2	0.280322	ENSG00000124783	SSR1
																														ENSG00000172809	RPL38	0.111107	ENSG00000164346	NSA2	0.164556	ENSG00000105329	TGFB1	0.332948	ENSG00000160710	ADAR	0.212841	ENSG00000109046	WSB1	0.700932	ENSG00000137752	CASP1	0.280322	ENSG00000186407	CD300E
																														ENSG00000186298	PPP1CC	0.111012	ENSG00000136942	RPL35	0.164516	ENSG00000125107	CNOT1	0.332493	ENSG00000165678	GHITM	0.21166	ENSG00000136938	ANP32B	0.697929	ENSG00000106066	CPVL	0.280322	ENSG00000134884	ARGLU1
																														ENSG00000147813	NAPRT	0.110362	ENSG00000103811	CTSH	0.164507	ENSG00000109920	FNBP4	0.332493	ENSG00000147065	MSN	0.21117	ENSG00000265972	TXNIP	0.697336	ENSG00000101745	ANKRD12	0.270862	ENSG00000113811	SELENOK
																														ENSG00000173120	KDM2A	0.11001	ENSG00000140575	IQGAP1	0.163264	ENSG00000141002	TCF25	0.331153	ENSG00000105438	KDELR1	0.210441	ENSG00000126247	CAPNS1	0.693825	ENSG00000115053	NCL	0.270862	ENSG00000250479	CHCHD10
																														ENSG00000113575	PPP2CA	0.109197	ENSG00000008988	RPS20	0.161155	ENSG00000129534	MIS18BP1	0.330065	ENSG00000213719	CLIC1	0.210062	ENSG00000141682	PMAIP1	0.693825	ENSG00000158050	DUSP2	0.270862	ENSG00000099795	NDUFB7
																														ENSG00000187239	FNBP1	0.108742	ENSG00000168961	LGALS9	0.160792	ENSG00000176731	C8orf59	0.330065	ENSG00000125977	EIF2S2	0.209942	ENSG00000005020	SKAP2	0.693825	ENSG00000087086	FTL	0.267938	ENSG00000168066	SF1
																														ENSG00000128524	ATP6V1F	0.107631	ENSG00000117091	CD48	0.159393	ENSG00000041357	PSMA4	0.329061	ENSG00000139233	LLPH	0.209606	ENSG00000110876	SELPLG	0.687876	ENSG00000188906	LRRK2	0.266108	ENSG00000138668	HNRNPD
																														ENSG00000164733	CTSB	0.107015	ENSG00000136250	AOAH	0.158892	ENSG00000010404	IDS	0.327755	ENSG00000147416	ATP6V1B2	0.209606	ENSG00000048828	FAM120A	0.687876	ENSG00000142227	EMP3	0.258151	ENSG00000165119	HNRNPK
																														ENSG00000174718	KIAA1551	0.106921	ENSG00000136003	ISCU	0.157474	ENSG00000133872	SARAF	0.327755	ENSG00000143321	HDGF	0.209606	ENSG00000086300	SNX10	0.687876	ENSG00000100300	TSPO	0.255595	ENSG00000167863	ATP5PD
																														ENSG00000198909	MAP3K3	0.106892	ENSG00000106245	BUD31	0.157474	ENSG00000140678	ITGAX	0.325986	ENSG00000023191	RNH1	0.209039	ENSG00000113712	CSNK1A1	0.687876	ENSG00000144802	NFKBIZ	0.251753	ENSG00000160593	JAML
																														ENSG00000125835	SNRPB	0.10623	ENSG00000110955	ATP5F1B	0.156129	ENSG00000146386	ABRACL	0.325554	ENSG00000106948	AKNA	0.207881	ENSG00000148834	GSTO1	0.683771	ENSG00000116679	IVNS1ABP	0.251753	ENSG00000241399	CD302
																														ENSG00000115234	SNX17	0.106204	ENSG00000142634	EFHD2	0.156029	ENSG00000152082	MZT2B	0.325554	ENSG00000159388	BTG2	0.207881	ENSG00000182578	CSF1R	0.683771	ENSG00000075624	ACTB	0.241469	ENSG00000147065	MSN
																														ENSG00000048740	CELF2	0.106021	ENSG00000120708	TGFBI	0.155383	ENSG00000104164	BLOC1S6	0.324843	ENSG00000111275	ALDH2	0.207716	ENSG00000130313	PGLS	0.678477	ENSG00000118515	SGK1	0.240165	ENSG00000189043	NDUFA4
																														ENSG00000099341	PSMD8	0.105718	ENSG00000165280	VCP	0.155148	ENSG00000062194	GPBP1	0.324283	ENSG00000118705	RPN2	0.206877	ENSG00000099624	ATP5F1D	0.678477	ENSG00000204397	CARD16	0.240165	ENSG00000277632	CCL3
																														ENSG00000175756	AURKAIP1	0.105658	ENSG00000008952	SEC62	0.154473	ENSG00000185432	METTL7A	0.323455	ENSG00000178927	CYBC1	0.206688	ENSG00000035862	TIMP2	0.678477	ENSG00000167658	EEF2	0.235928	ENSG00000100911	PSME2
																														ENSG00000197111	PCBP2	0.105547	ENSG00000011422	PLAUR	0.154018	ENSG00000100354	TNRC6B	0.322873	ENSG00000174718	KIAA1551	0.206688	ENSG00000111897	SERINC1	0.678477	ENSG00000007237	GAS7	0.232388	ENSG00000198258	UBL5
																														ENSG00000071082	RPL31	0.104634	ENSG00000134046	MBD2	0.153878	ENSG00000171988	JMJD1C	0.322108	ENSG00000102030	NAA10	0.206688	ENSG00000213064	SFT2D2	0.678477	ENSG00000165502	RPL36AL	0.232388	ENSG00000182287	AP1S2
																														ENSG00000067167	TRAM1	0.104235	ENSG00000131504	DIAPH1	0.152584	ENSG00000101972	STAG2	0.322108	ENSG00000118564	FBXL5	0.206688	ENSG00000143546	S100A8	0.671387	ENSG00000107290	SETX	0.232388	ENSG00000019582	CD74
																														ENSG00000100364	KIAA0930	0.104129	ENSG00000136930	PSMB7	0.152167	ENSG00000145819	ARHGAP26	0.32106	ENSG00000184076	UQCR10	0.206412	ENSG00000100364	KIAA0930	0.661403	ENSG00000121966	CXCR4	0.232388	ENSG00000099331	MYO9B
																														ENSG00000166340	TPP1	0.103911	ENSG00000125676	THOC2	0.152167	ENSG00000183011	NAA38	0.319534	ENSG00000145569	OTULINL	0.205146	ENSG00000131042	LILRB2	0.661403	ENSG00000122566	HNRNPA2B1	0.228483	ENSG00000068079	IFI35
																														ENSG00000129003	VPS13C	0.103877	ENSG00000112406	HECA	0.150977	ENSG00000140931	CMTM3	0.319534	ENSG00000160255	ITGB2	0.204702	ENSG00000204577	LILRB3	0.661403	ENSG00000108179	PPIF	0.222607	ENSG00000089220	PEBP1
																														ENSG00000127528	KLF2	0.103864	ENSG00000179388	EGR3	0.150338	ENSG00000172757	CFL1	0.318914	ENSG00000169020	ATP5ME	0.203707	ENSG00000126934	MAP2K2	0.661403	ENSG00000104529	EEF1D	0.219331	ENSG00000122694	GLIPR2
																														ENSG00000118418	HMGN3	0.103817	ENSG00000198668	CALM1	0.150244	ENSG00000182220	ATP6AP2	0.31871	ENSG00000142634	EFHD2	0.203413	ENSG00000011304	PTBP1	0.661403	ENSG00000204482	LST1	0.218394	ENSG00000175416	CLTB
																														ENSG00000183283	DAZAP2	0.103731	ENSG00000129128	SPCS3	0.14978	ENSG00000171530	TBCA	0.31871	ENSG00000048740	CELF2	0.202946	ENSG00000167085	PHB	0.661403	ENSG00000131981	LGALS3	0.216706	ENSG00000135077	HAVCR2
																														ENSG00000159352	PSMD4	0.103683	ENSG00000068650	ATP11A	0.149665	ENSG00000213064	SFT2D2	0.318061	ENSG00000111642	CHD4	0.20272	ENSG00000175826	CTDNEP1	0.661403	ENSG00000135655	USP15	0.216706	ENSG00000056097	ZFR
																														ENSG00000136286	MYO1G	0.103382	ENSG00000128245	YWHAH	0.149197	ENSG00000261371	PECAM1	0.317538	ENSG00000103653	CSK	0.202572	ENSG00000083799	CYLD	0.661403	ENSG00000124942	AHNAK	0.202843	ENSG00000163320	CGGBP1
																														ENSG00000030582	GRN	0.103256	ENSG00000005339	CREBBP	0.149197	ENSG00000109046	WSB1	0.315946	ENSG00000129625	REEP5	0.202217	ENSG00000100823	APEX1	0.661403	ENSG00000171223	JUNB	0.192859	ENSG00000173559	NABP1
																														ENSG00000139218	SCAF11	0.103161	ENSG00000153310	FAM49B	0.147113	ENSG00000183255	PTTG1IP	0.315264	ENSG00000081189	MEF2C	0.202033	ENSG00000175029	CTBP2	0.661403	ENSG00000118680	MYL12B	0.192859	ENSG00000100300	TSPO
																														ENSG00000145494	NDUFS6	0.102409	ENSG00000104972	LILRB1	0.146586	ENSG00000091039	OSBPL8	0.314263	ENSG00000173674	EIF1AX	0.201635	ENSG00000166295	ANAPC16	0.661403	ENSG00000110077	MS4A6A	0.192859	ENSG00000100345	MYH9
																														ENSG00000081320	STK17B	0.102311	ENSG00000249437	NAIP	0.146586	ENSG00000153113	CAST	0.31332	ENSG00000169738	DCXR	0.201099	ENSG00000110395	CBL	0.661403	ENSG00000130592	LSP1	0.192859	ENSG00000171700	RGS19
																														ENSG00000069974	RAB27A	0.102271	ENSG00000182287	AP1S2	0.145988	ENSG00000126067	PSMB2	0.312648	ENSG00000196591	HDAC2	0.201099	ENSG00000120913	PDLIM2	0.661403	ENSG00000124831	LRRFIP1	0.192859	ENSG00000101266	CSNK2A1
																														ENSG00000100393	EP300	0.102139	ENSG00000228253	MT-ATP8	0.145852	ENSG00000170348	TMED10	0.312648	ENSG00000154582	ELOC	0.200765	ENSG00000175416	CLTB	0.661403	ENSG00000163171	CDC42EP3	0.192859	ENSG00000176463	SLCO3A1
																														ENSG00000092531	SNAP23	0.102031	ENSG00000166340	TPP1	0.145472	ENSG00000143815	LBR	0.309608	ENSG00000135655	USP15	0.199765	ENSG00000118855	MFSD1	0.661403	ENSG00000087074	PPP1R15A	0.192859	ENSG00000140307	GTF2A2
																														ENSG00000065413	ANKRD44	0.101446	ENSG00000147684	NDUFB9	0.144272	ENSG00000240065	PSMB9	0.309028	ENSG00000153201	RANBP2	0.199719	ENSG00000198625	MDM4	0.661403	ENSG00000099795	NDUFB7	0.192859	ENSG00000075415	SLC25A3
																														ENSG00000070190	DAPP1	0.101005	ENSG00000089157	RPLP0	0.143808	ENSG00000104133	SPG11	0.308646	ENSG00000116459	ATP5PB	0.199535	ENSG00000122218	COPA	0.661403	ENSG00000187446	CHP1	0.192859	ENSG00000172243	CLEC7A
																														ENSG00000105438	KDELR1	0.100881	ENSG00000152818	UTRN	0.143636	ENSG00000144136	SLC20A1	0.308646	ENSG00000214212	C19orf38	0.199072	ENSG00000150977	RILPL2	0.652126	ENSG00000090060	PAPOLA	0.192859	ENSG00000107581	EIF3A
																														ENSG00000235568	NFAM1	0.100826	ENSG00000124126	PREX1	0.143418	ENSG00000164919	COX6C	0.308646	ENSG00000116604	MEF2D	0.199072	ENSG00000082074	FYB1	0.648912	ENSG00000131446	MGAT1	0.192859	ENSG00000149187	CELF1
																														ENSG00000167863	ATP5PD	0.100233	ENSG00000148834	GSTO1	0.143211	ENSG00000131238	PPT1	0.307402	ENSG00000185624	P4HB	0.198879	ENSG00000110955	ATP5F1B	0.646296	ENSG00000134516	DOCK2	0.192859	ENSG00000197601	FAR1
																														ENSG00000003402	CFLAR	0.100037	ENSG00000067900	ROCK1	0.142974	ENSG00000127022	CANX	0.306795	ENSG00000170458	CD14	0.198341	ENSG00000228253	MT-ATP8	0.646296	ENSG00000131504	DIAPH1	0.192859	ENSG00000160131	VMA21
																														ENSG00000065615	CYB5R4	0.0995467	ENSG00000147677	EIF3H	0.142518	ENSG00000101294	HM13	0.305729	ENSG00000139970	RTN1	0.196755	ENSG00000159128	IFNGR2	0.646296	ENSG00000019582	CD74	0.184822	ENSG00000164463	CREBRF
																														ENSG00000174886	NDUFA11	0.0993846	ENSG00000057608	GDI2	0.141286	ENSG00000067225	PKM	0.305729	ENSG00000156136	DCK	0.196185	ENSG00000110324	IL10RA	0.646296	ENSG00000204525	HLA-C	0.182806	ENSG00000131495	NDUFA2
																														ENSG00000070756	PABPC1	0.099161	ENSG00000125835	SNRPB	0.141026	ENSG00000187239	FNBP1	0.305729	ENSG00000152558	TMEM123	0.195892	ENSG00000164713	BRI3	0.644125	ENSG00000167996	FTH1	0.178046	ENSG00000131508	UBE2D2
																														ENSG00000119900	OGFRL1	0.0990942	ENSG00000084733	RAB10	0.141026	ENSG00000100568	VTI1B	0.305035	ENSG00000038427	VCAN	0.195878	ENSG00000129226	CD68	0.642295	ENSG00000172243	CLEC7A	0.175581	ENSG00000170860	LSM3
																														ENSG00000119705	SLIRP	0.0987656	ENSG00000166012	TAF1D	0.140709	ENSG00000129968	ABHD17A	0.304186	ENSG00000155849	ELMO1	0.195042	ENSG00000102524	TNFSF13B	0.639377	ENSG00000067082	KLF6	0.174712	ENSG00000135930	EIF4E2
																														ENSG00000197102	DYNC1H1	0.0985346	ENSG00000118564	FBXL5	0.139807	ENSG00000054267	ARID4B	0.304186	ENSG00000120438	TCP1	0.195042	ENSG00000153922	CHD1	0.639377	ENSG00000093072	ADA2	0.168612	ENSG00000182551	ADI1
																														ENSG00000135049	AGTPBP1	0.0984057	ENSG00000159377	PSMB4	0.139496	ENSG00000198604	BAZ1A	0.303687	ENSG00000020633	RUNX3	0.195042	ENSG00000198727	MT-CYB	0.637764	ENSG00000170315	UBB	0.168612	ENSG00000130770	ATP5IF1
																														ENSG00000153815	CMIP	0.0980774	ENSG00000152234	ATP5F1A	0.138972	ENSG00000143977	SNRPG	0.303687	ENSG00000225921	NOL7	0.195042	ENSG00000204264	PSMB8	0.635408	ENSG00000141480	ARRB2	0.168612	ENSG00000116288	PARK7
																														ENSG00000027697	IFNGR1	0.0980524	ENSG00000153786	ZDHHC7	0.138858	ENSG00000103381	CPPED1	0.30176	ENSG00000155366	RHOC	0.194499	ENSG00000112149	CD83	0.629695	ENSG00000137575	SDCBP	0.168612	ENSG00000129128	SPCS3
																														ENSG00000067225	PKM	0.0979165	ENSG00000093144	ECHDC1	0.138858	ENSG00000149932	TMEM219	0.30176	ENSG00000010256	UQCRC1	0.194034	ENSG00000157557	ETS2	0.620761	ENSG00000163660	CCNL1	0.168612	ENSG00000160310	PRMT2
																														ENSG00000144802	NFKBIZ	0.0973021	ENSG00000167004	PDIA3	0.138858	ENSG00000168385	2021-09-02	0.30176	ENSG00000144655	CSRNP1	0.192972	ENSG00000100354	TNRC6B	0.620761	ENSG00000135821	GLUL	0.168612	ENSG00000160410	SHKBP1
																														ENSG00000054267	ARID4B	0.0969307	ENSG00000133574	GIMAP4	0.137652	ENSG00000177989	ODF3B	0.30176	ENSG00000100554	ATP6V1D	0.191684	ENSG00000076928	ARHGEF1	0.620761	ENSG00000069974	RAB27A	0.162486	ENSG00000133313	CNDP2
																														ENSG00000188641	DPYD	0.0968938	ENSG00000103653	CSK	0.13697	ENSG00000182831	C16orf72	0.30176	ENSG00000176731	C8orf59	0.191146	ENSG00000129351	ILF3	0.620761	ENSG00000140105	WARS	0.162486	ENSG00000153815	CMIP
																														ENSG00000176853	FAM91A1	0.0968169	ENSG00000125107	CNOT1	0.136532	ENSG00000130775	THEMIS2	0.30176	ENSG00000163162	RNF149	0.191146	ENSG00000010244	ZNF207	0.620761	ENSG00000169567	HINT1	0.162486	ENSG00000093167	LRRFIP2
																														ENSG00000115165	CYTIP	0.0960791	ENSG00000077380	DYNC1I2	0.136532	ENSG00000115310	RTN4	0.300836	ENSG00000152795	HNRNPDL	0.191035	ENSG00000139163	ETNK1	0.620761	ENSG00000164032	H2AFZ	0.162486	ENSG00000172845	SP3
																														ENSG00000147123	NDUFB11	0.096025	ENSG00000185432	METTL7A	0.136144	ENSG00000135535	CD164	0.300609	ENSG00000231389	HLA-DPA1	0.190777	ENSG00000120594	PLXDC2	0.620761	ENSG00000165732	DDX21	0.158094	ENSG00000150540	HNMT
																														ENSG00000155957	TMBIM4	0.0956033	ENSG00000100354	TNRC6B	0.135691	ENSG00000168961	LGALS9	0.300234	ENSG00000162521	RBBP4	0.190747	ENSG00000196954	CASP4	0.620761	ENSG00000165119	HNRNPK	0.158094	ENSG00000159352	PSMD4
																														ENSG00000167470	MIDN	0.0953485	ENSG00000129559	NEDD8	0.135306	ENSG00000140307	GTF2A2	0.299497	ENSG00000102144	PGK1	0.19069	ENSG00000183779	ZNF703	0.620761	ENSG00000140678	ITGAX	0.152217	ENSG00000141682	PMAIP1
																														ENSG00000136819	C9orf78	0.0946693	ENSG00000142669	SH3BGRL3	0.135208	ENSG00000136819	C9orf78	0.299497	ENSG00000117523	PRRC2C	0.190311	ENSG00000122644	ARL4A	0.620761	ENSG00000111275	ALDH2	0.152217	ENSG00000182774	RPS17
																														ENSG00000135387	CAPRIN1	0.0945697	ENSG00000189403	HMGB1	0.135071	ENSG00000124795	DEK	0.299062	ENSG00000217555	CKLF	0.190196	ENSG00000198843	SELENOT	0.620761	ENSG00000147872	PLIN2	0.152217	ENSG00000007237	GAS7
																														ENSG00000143106	PSMA5	0.0945421	ENSG00000168002	POLR2G	0.134513	ENSG00000143162	CREG1	0.298776	ENSG00000089053	ANAPC5	0.188073	ENSG00000144895	EIF2A	0.620761	ENSG00000181467	RAP2B	0.152217	ENSG00000067829	IDH3G
																														ENSG00000120738	EGR1	0.0944971	ENSG00000114416	FXR1	0.134513	ENSG00000049245	VAMP3	0.298776	ENSG00000159023	EPB41	0.188073	ENSG00000273338	AC103591.3	0.620761	ENSG00000115415	STAT1	0.152217	ENSG00000133606	MKRN1
																														ENSG00000138398	PPIG	0.0944226	ENSG00000125534	PPDPF	0.134513	ENSG00000069329	VPS35	0.297381	ENSG00000177105	RHOG	0.188073	ENSG00000116350	SRSF4	0.620761	ENSG00000168653	NDUFS5	0.152217	ENSG00000105939	ZC3HAV1
																														ENSG00000182718	ANXA2	0.0939022	ENSG00000112343	TRIM38	0.134513	ENSG00000163399	ATP1A1	0.297381	ENSG00000117448	AKR1A1	0.188073	ENSG00000164919	COX6C	0.614098	ENSG00000198258	UBL5	0.14395	ENSG00000105968	H2AFV
																														ENSG00000143198	MGST3	0.0932604	ENSG00000196419	XRCC6	0.134513	ENSG00000033800	PIAS1	0.296046	ENSG00000000938	FGR	0.188073	ENSG00000103187	COTL1	0.612735	ENSG00000147065	MSN	0.140392	ENSG00000071127	WDR1
																														ENSG00000160712	IL6R	0.0927917	ENSG00000164919	COX6C	0.134061	ENSG00000163683	SMIM14	0.296046	ENSG00000161921	CXCL16	0.188073	ENSG00000182718	ANXA2	0.611363	ENSG00000100201	DDX17	0.131459	ENSG00000088205	DDX18
																														ENSG00000108100	CCNY	0.0927088	ENSG00000158710	TAGLN2	0.133624	ENSG00000168894	RNF181	0.296046	ENSG00000128989	ARPP19	0.188073	ENSG00000197111	PCBP2	0.609873	ENSG00000111229	ARPC3	0.131459	ENSG00000142541	RPL13A
																														ENSG00000062194	GPBP1	0.0926245	ENSG00000101439	CST3	0.133068	ENSG00000179218	CALR	0.2954	ENSG00000115816	CEBPZ	0.188073	ENSG00000141480	ARRB2	0.607822	ENSG00000139218	SCAF11	0.131459	ENSG00000143110	C1orf162
																														ENSG00000162444	RBP7	0.0925221	ENSG00000185651	UBE2L3	0.132911	ENSG00000111011	RSRC2	0.293539	ENSG00000132963	POMP	0.188073	ENSG00000117984	CTSD	0.60482	ENSG00000171862	PTEN	0.131459	ENSG00000198786	MT-ND5
																														ENSG00000093072	ADA2	0.0923248	ENSG00000133318	RTN3	0.132646	ENSG00000106605	BLVRA	0.293539	ENSG00000152818	UTRN	0.188073	ENSG00000113269	RNF130	0.60482	ENSG00000127022	CANX	0.131459	ENSG00000131171	SH3BGRL
																														ENSG00000172243	CLEC7A	0.0919857	ENSG00000183726	TMEM50A	0.132416	ENSG00000086062	B4GALT1	0.293539	ENSG00000197019	SERTAD1	0.185729	ENSG00000198604	BAZ1A	0.600003	ENSG00000158195	WASF2	0.131459	ENSG00000126264	HCST
																														ENSG00000163527	STT3B	0.0915939	ENSG00000148908	RGS10	0.131068	ENSG00000143013	LMO4	0.293539	ENSG00000124228	DDX27	0.185587	ENSG00000110696	C11orf58	0.600003	ENSG00000115956	PLEK	0.12247	ENSG00000123146	ADGRE5
																														ENSG00000115762	PLEKHB2	0.0902323	ENSG00000067167	TRAM1	0.131068	ENSG00000163220	S100A9	0.292291	ENSG00000166226	CCT2	0.185428	ENSG00000163220	S100A9	0.594998	ENSG00000162511	LAPTM5	0.120347	ENSG00000145287	PLAC8
																														ENSG00000164548	TRA2A	0.0902056	ENSG00000144848	ATG3	0.131068	ENSG00000108639	SYNGR2	0.291229	ENSG00000143549	TPM3	0.185274	ENSG00000110852	CLEC2B	0.591014	ENSG00000115524	SF3B1	0.118859	ENSG00000160932	LY6E
																														ENSG00000142541	RPL13A	0.0900754	ENSG00000197958	RPL12	0.131024	ENSG00000048740	CELF2	0.290953	ENSG00000067900	ROCK1	0.185247	ENSG00000173221	GLRX	0.591014	ENSG00000132334	PTPRE	0.110397	ENSG00000180370	PAK2
																														ENSG00000169045	HNRNPH1	0.090044	ENSG00000049245	VAMP3	0.130818	ENSG00000053254	FOXN3	0.290141	ENSG00000141580	WDR45B	0.185039	ENSG00000034152	MAP2K3	0.591014	ENSG00000101109	STK4	0.110397	ENSG00000125977	EIF2S2
																														ENSG00000100345	MYH9	0.0898996	ENSG00000130414	NDUFA10	0.128715	ENSG00000161203	AP2M1	0.290141	ENSG00000135404	CD63	0.184798	ENSG00000100599	RIN3	0.591014	ENSG00000101265	RASSF2	0.110397	ENSG00000065518	NDUFB4
																														ENSG00000141552	ANAPC11	0.0895594	ENSG00000180776	ZDHHC20	0.128545	ENSG00000163527	STT3B	0.289093	ENSG00000081320	STK17B	0.18459	ENSG00000100612	DHRS7	0.591014	ENSG00000255112	CHMP1B	0.110397	ENSG00000152234	ATP5F1A
																														ENSG00000108179	PPIF	0.0891565	ENSG00000163682	RPL9	0.127124	ENSG00000116350	SRSF4	0.287113	ENSG00000085832	EPS15	0.184515	ENSG00000117335	CD46	0.591014	ENSG00000173915	ATP5MD	0.110397	ENSG00000119705	SLIRP
																														ENSG00000187164	SHTN1	0.0890024	ENSG00000099341	PSMD8	0.126408	ENSG00000063245	EPN1	0.287113	ENSG00000156411	ATP5MPL	0.183897	ENSG00000011600	TYROBP	0.584559	ENSG00000159840	ZYX	0.110397	ENSG00000118508	RAB32
																														ENSG00000110367	DDX6	0.0880966	ENSG00000133246	PRAM1	0.125707	ENSG00000139436	GIT2	0.287113	ENSG00000119396	RAB14	0.182975	ENSG00000010610	CD4	0.582794	ENSG00000198833	UBE2J1	0.110397	ENSG00000129625	REEP5
																														ENSG00000162511	LAPTM5	0.088058	ENSG00000180879	SSR4	0.125484	ENSG00000169019	COMMD8	0.287113	ENSG00000106245	BUD31	0.182975	ENSG00000131446	MGAT1	0.582794	ENSG00000170275	CRTAP	0.110397	ENSG00000116701	NCF2
																														ENSG00000074800	ENO1	0.0879852	ENSG00000172531	PPP1CA	0.125052	ENSG00000167978	SRRM2	0.285992	ENSG00000128609	NDUFA5	0.182255	ENSG00000160255	ITGB2	0.582794	ENSG00000115165	CYTIP	0.110397	ENSG00000167996	FTH1
																														ENSG00000142168	SOD1	0.0878229	ENSG00000109323	MANBA	0.125052	ENSG00000126005	MMP24OS	0.284399	ENSG00000182670	TTC3	0.182115	ENSG00000028137	TNFRSF1B	0.578941	ENSG00000116459	ATP5PB	0.110397	ENSG00000121691	CAT
																														ENSG00000150977	RILPL2	0.0878229	ENSG00000131469	RPL27	0.124232	ENSG00000112773	TENT5A	0.284399	ENSG00000198791	CNOT7	0.1813	ENSG00000130429	ARPC1B	0.578075	ENSG00000129824	RPS4Y1	0.0997498	ENSG00000112308	C6orf62
																														ENSG00000170515	PA2G4	0.0871384	ENSG00000104765	BNIP3L	0.123866	ENSG00000143198	MGST3	0.284399	ENSG00000121774	KHDRBS1	0.180693	ENSG00000135441	BLOC1S1	0.576706	ENSG00000198265	HELZ	0.0997498	ENSG00000104660	LEPROTL1
																														ENSG00000205352	PRR13	0.0870796	ENSG00000003402	CFLAR	0.122728	ENSG00000162368	CMPK1	0.284399	ENSG00000082212	ME2	0.180693	ENSG00000123416	TUBA1B	0.576706	ENSG00000131174	COX7B	0.0997498	ENSG00000162434	JAK1
																														ENSG00000115935	WIPF1	0.0866221	ENSG00000038427	VCAN	0.122716	ENSG00000025708	TYMP	0.284034	ENSG00000204574	ABCF1	0.180693	ENSG00000081320	STK17B	0.572867	ENSG00000169756	LIMS1	0.0997498	ENSG00000119655	NPC2
																														ENSG00000134108	ARL8B	0.0863579	ENSG00000178952	TUFM	0.122622	ENSG00000092841	MYL6	0.283555	ENSG00000196776	CD47	0.180347	ENSG00000277632	CCL3	0.568294	ENSG00000156411	ATP5MPL	0.0997498	ENSG00000135046	ANXA1
																														ENSG00000125743	SNRPD2	0.0862577	ENSG00000167863	ATP5PD	0.120665	ENSG00000005483	KMT2E	0.283555	ENSG00000175334	BANF1	0.180225	ENSG00000075415	SLC25A3	0.568294	ENSG00000136826	KLF4	0.0997498	ENSG00000136051	WASHC4
																														ENSG00000137876	RSL24D1	0.0858717	ENSG00000177733	HNRNPA0	0.120299	ENSG00000105404	RABAC1	0.281951	ENSG00000179262	RAD23A	0.179693	ENSG00000099331	MYO9B	0.568294	ENSG00000198034	RPS4X	0.0982223	ENSG00000266412	NCOA4
																														ENSG00000085514	PILRA	0.0854493	ENSG00000102172	SMS	0.11995	ENSG00000232388	SMIM26	0.281951	ENSG00000164104	HMGB2	0.17946	ENSG00000152558	TMEM123	0.568294	ENSG00000091527	CDV3	0.0933235	ENSG00000104714	ERICH1
																														ENSG00000109323	MANBA	0.0853714	ENSG00000140105	WARS	0.119678	ENSG00000145675	PIK3R1	0.281951	ENSG00000151651	ADAM8	0.179084	ENSG00000155115	GTF3C6	0.568294	ENSG00000162704	ARPC5	0.0909796	ENSG00000205302	SNX2
																														ENSG00000160209	PDXK	0.0847909	ENSG00000105329	TGFB1	0.119364	ENSG00000072135	PTPN18	0.281951	ENSG00000134516	DOCK2	0.179084	ENSG00000109787	KLF3	0.568294	ENSG00000215301	DDX3X	0.0890234	ENSG00000124357	NAGK
																														ENSG00000107341	UBE2R2	0.0847533	ENSG00000041357	PSMA4	0.119	ENSG00000162521	RBBP4	0.281951	ENSG00000247596	TWF2	0.178566	ENSG00000115241	PPM1G	0.568294	ENSG00000197746	PSAP	0.0847104	ENSG00000117500	TMED5
																														ENSG00000131446	MGAT1	0.0845088	ENSG00000067829	IDH3G	0.119	ENSG00000204577	LILRB3	0.280816	ENSG00000168264	IRF2BP2	0.178516	ENSG00000078369	GNB1	0.568294	ENSG00000099977	DDT	0.0673283	ENSG00000134440	NARS
																														ENSG00000067066	SP100	0.0838383	ENSG00000113732	ATP6V0E1	0.119	ENSG00000143742	SRP9	0.280449	ENSG00000170540	ARL6IP1	0.178379	ENSG00000135404	CD63	0.568294	ENSG00000171051	FPR1	0.0673283	ENSG00000122257	RBBP6
																														ENSG00000112697	TMEM30A	0.0833584	ENSG00000104093	DMXL2	0.118711	ENSG00000139112	GABARAPL1	0.278701	ENSG00000078304	PPP2R5C	0.178379	ENSG00000204472	AIF1	0.561036	ENSG00000129355	CDKN2D	0.0673283	ENSG00000096968	JAK2
																														ENSG00000204577	LILRB3	0.0830427	ENSG00000138674	SEC31A	0.117439	ENSG00000136167	LCP1	0.278164	ENSG00000165025	SYK	0.178225	ENSG00000116701	NCF2	0.558834	ENSG00000101608	MYL12A	0.0673283	ENSG00000115944	COX7A2L
																														ENSG00000089737	DDX24	0.0826188	ENSG00000111913	RIPOR2	0.116461	ENSG00000165527	ARF6	0.277714	ENSG00000105193	RPS16	0.176621	ENSG00000173020	GRK2	0.55591	ENSG00000089280	FUS	0.0673283	ENSG00000135940	COX5B
																														ENSG00000231925	TAPBP	0.0824499	ENSG00000140350	ANP32A	0.116212	ENSG00000137509	PRCP	0.277714	ENSG00000135624	CCT7	0.176577	ENSG00000241553	ARPC4	0.55591	ENSG00000132963	POMP	0.0673283	ENSG00000166913	YWHAB
																														ENSG00000108669	CYTH1	0.0818544	ENSG00000132824	SERINC3	0.116212	ENSG00000166927	MS4A7	0.277714	ENSG00000154723	ATP5PF	0.176577	ENSG00000084733	RAB10	0.55591	ENSG00000150977	RILPL2	0.0673283	ENSG00000132824	SERINC3
																														ENSG00000070831	CDC42	0.0817282	ENSG00000125944	HNRNPR	0.116212	ENSG00000136869	TLR4	0.276466	ENSG00000182718	ANXA2	0.175158	ENSG00000070961	ATP2B1	0.550372	ENSG00000095787	WAC	0.0673283	ENSG00000168461	RAB31
																														ENSG00000162711	NLRP3	0.081486	ENSG00000122694	GLIPR2	0.115859	ENSG00000159216	RUNX1	0.275868	ENSG00000136250	AOAH	0.175017	ENSG00000231925	TAPBP	0.54521	ENSG00000152558	TMEM123	0.0673283	ENSG00000143761	ARF1
																														ENSG00000140740	UQCRC2	0.0813111	ENSG00000178449	COX14	0.115692	ENSG00000196199	MPHOSPH8	0.275868	ENSG00000143384	MCL1	0.174997	ENSG00000198886	MT-ND4	0.537465	ENSG00000197629	MPEG1	0.0673283	ENSG00000081320	STK17B
																														ENSG00000105887	MTPN	0.0805876	ENSG00000130402	ACTN4	0.11553	ENSG00000136754	ABI1	0.275868	ENSG00000165669	FAM204A	0.174714	ENSG00000228300	C19orf24	0.535872	ENSG00000104765	BNIP3L	0.0673283	ENSG00000125870	SNRPB2
																														ENSG00000034713	GABARAPL2	0.0805809	ENSG00000135930	EIF4E2	0.11553	ENSG00000101367	MAPRE1	0.274174	ENSG00000100365	NCF4	0.174714	ENSG00000118705	RPN2	0.535872	ENSG00000183696	UPP1	0.0673283	ENSG00000067082	KLF6
																														ENSG00000103187	COTL1	0.079768	ENSG00000130811	EIF3G	0.115095	ENSG00000147684	NDUFB9	0.272613	ENSG00000230989	HSBP1	0.17415	ENSG00000125991	ERGIC3	0.535872	ENSG00000170571	EMB	0.0673283	ENSG00000124570	SERPINB6
																														ENSG00000100503	NIN	0.0797511	ENSG00000147872	PLIN2	0.115095	ENSG00000134250	NOTCH2	0.27212	ENSG00000205302	SNX2	0.17415	ENSG00000141580	WDR45B	0.535872	ENSG00000254999	BRK1	0.0673283	ENSG00000169230	PRELID1
																														ENSG00000185043	CIB1	0.0790255	ENSG00000158517	NCF1	0.115019	ENSG00000142657	PGD	0.271171	ENSG00000138398	PPIG	0.173717	ENSG00000108588	CCDC47	0.535872	ENSG00000153250	RBMS1	0.0673283	ENSG00000003402	CFLAR
																														ENSG00000169155	ZBTB43	0.0790088	ENSG00000054148	PHPT1	0.113517	ENSG00000141298	SSH2	0.269835	ENSG00000071994	PDCD2	0.173537	ENSG00000197912	SPG7	0.535872	ENSG00000117450	PRDX1	0.0673283	ENSG00000160710	ADAR
																														ENSG00000170458	CD14	0.0777121	ENSG00000088930	XRN2	0.113139	ENSG00000251562	MALAT1	0.26925	ENSG00000110324	IL10RA	0.172131	ENSG00000257621	PSMA3-AS1	0.535872	ENSG00000120129	DUSP1	0.0526816	ENSG00000076944	STXBP2
																														ENSG00000091039	OSBPL8	0.0774788	ENSG00000135387	CAPRIN1	0.112638	ENSG00000204435	CSNK2B	0.268593	ENSG00000130844	ZNF331	0.172131	ENSG00000100519	PSMC6	0.535872	ENSG00000081320	STK17B	0.045302	ENSG00000129355	CDKN2D
																														ENSG00000198931	APRT	0.0773966	ENSG00000107099	DOCK8	0.112638	ENSG00000043462	LCP2	0.268593	ENSG00000165637	VDAC2	0.170925	ENSG00000129518	EAPP	0.535872	ENSG00000101347	SAMHD1	0.0408561	ENSG00000139921	TMX1
																														ENSG00000057608	GDI2	0.0770816	ENSG00000114450	GNB4	0.112638	ENSG00000134308	YWHAQ	0.268593	ENSG00000260032	NORAD	0.170151	ENSG00000068650	ATP11A	0.535872	ENSG00000103381	CPPED1	0.0341615	ENSG00000168300	PCMTD1
																														ENSG00000198886	MT-ND4	0.0769761	ENSG00000105518	TMEM205	0.112203	ENSG00000152818	UTRN	0.267435	ENSG00000148908	RGS10	0.170151	ENSG00000088448	ANKRD10	0.535872	ENSG00000182774	RPS17	0.0341615	ENSG00000129675	ARHGEF6
																														ENSG00000241399	CD302	0.0767609	ENSG00000170348	TMED10	0.11182	ENSG00000170458	CD14	0.265896	ENSG00000111775	COX6A1	0.169772	ENSG00000166598	HSP90B1	0.535872	ENSG00000139278	GLIPR1	0.0341615	ENSG00000138069	RAB1A
																														ENSG00000177885	GRB2	0.0762026	ENSG00000131143	COX4I1	0.111636	ENSG00000120616	EPC1	0.265342	ENSG00000162191	UBXN1	0.169611	ENSG00000111276	CDKN1B	0.535872	ENSG00000090266	NDUFB2	0.0341615	ENSG00000138029	HADHB
																														ENSG00000220205	VAMP2	0.0761054	ENSG00000178695	KCTD12	0.11091	ENSG00000167461	RAB8A	0.264393	ENSG00000139668	WDFY2	0.169214	ENSG00000134453	RBM17	0.535872	ENSG00000182287	AP1S2	0.0311081	ENSG00000101558	VAPA
																														ENSG00000153317	ASAP1	0.075309	ENSG00000106052	TAX1BP1	0.11059	ENSG00000135241	PNPLA8	0.2635	ENSG00000089280	FUS	0.168909	ENSG00000165494	PCF11	0.535872	ENSG00000165168	CYBB	0.0304287	ENSG00000166136	NDUFB8
																														ENSG00000198786	MT-ND5	0.0752396	ENSG00000268734	AC245128.3	0.110445	ENSG00000120594	PLXDC2	0.263215	ENSG00000100823	APEX1	0.168667	ENSG00000054967	RELT	0.535872	ENSG00000104408	EIF3E	0.0293605	ENSG00000127914	AKAP9
																														ENSG00000176340	COX8A	0.0745496	ENSG00000100138	SNU13	0.109891	ENSG00000173442	EHBP1L1	0.261867	ENSG00000120708	TGFBI	0.167487	ENSG00000128585	MKLN1	0.535872	ENSG00000157557	ETS2	0.0229342	ENSG00000183726	TMEM50A
																														ENSG00000188612	SUMO2	0.0741176	ENSG00000077549	CAPZB	0.109638	ENSG00000118855	MFSD1	0.261867	ENSG00000066336	SPI1	0.166856	ENSG00000112079	STK38	0.535872	ENSG00000105583	WDR83OS	0.0229342	ENSG00000122566	HNRNPA2B1
																														ENSG00000163349	HIPK1	0.0740697	ENSG00000183283	DAZAP2	0.109619	ENSG00000166710	B2M	0.261736	ENSG00000141232	TOB1	0.166593	ENSG00000055163	CYFIP2	0.535872	ENSG00000174886	NDUFA11	0.0229342	ENSG00000092841	MYL6
																														ENSG00000168769	TET2	0.0740496	ENSG00000110934	BIN2	0.109591	ENSG00000108588	CCDC47	0.261118	ENSG00000127947	PTPN12	0.166046	ENSG00000145833	DDX46	0.535872	ENSG00000178951	ZBTB7A	0.0229342	ENSG00000118181	RPS25
																														ENSG00000167658	EEF2	0.0726314	ENSG00000134056	MRPS36	0.109458	ENSG00000136104	RNASEH2B	0.261118	ENSG00000104472	CHRAC1	0.165618	ENSG00000163110	PDLIM5	0.535872	ENSG00000104964	AES	0.0229342	ENSG00000142166	IFNAR1
																														ENSG00000165678	GHITM	0.072243	ENSG00000170571	EMB	0.108826	ENSG00000036257	CUL3	0.261118	ENSG00000115762	PLEKHB2	0.165618	ENSG00000175166	PSMD2	0.535872	ENSG00000255302	EID1	0.0229342	ENSG00000170638	TRABD
																														ENSG00000163399	ATP1A1	0.071611	ENSG00000104408	EIF3E	0.108484	ENSG00000066027	PPP2R5A	0.261118	ENSG00000082153	BZW1	0.164752	ENSG00000163754	GYG1	0.535872	ENSG00000084234	APLP2	0.0229342	ENSG00000100216	TOMM22
																														ENSG00000116171	SCP2	0.0713292	ENSG00000043462	LCP2	0.10845	ENSG00000173846	PLK3	0.261118	ENSG00000171858	RPS21	0.163947	ENSG00000185404	SP140L	0.535872	ENSG00000167283	ATP5MG	0.0229342	ENSG00000092148	HECTD1
																														ENSG00000182774	RPS17	0.0710967	ENSG00000165119	HNRNPK	0.107187	ENSG00000198886	MT-ND4	0.260627	ENSG00000110876	SELPLG	0.16378	ENSG00000143761	ARF1	0.535872	ENSG00000122705	CLTA	0.0229342	ENSG00000169826	CSGALNACT2
																														ENSG00000114331	ACAP2	0.0708782	ENSG00000093072	ADA2	0.106931	ENSG00000160255	ITGB2	0.259099	ENSG00000136527	TRA2B	0.163529	ENSG00000158615	PPP1R15B	0.535872	ENSG00000120992	LYPLA1	0.0229342	ENSG00000169919	GUSB
																														ENSG00000113916	BCL6	0.070421	ENSG00000204257	HLA-DMA	0.106839	ENSG00000198668	CALM1	0.258975	ENSG00000121552	CSTA	0.163063	ENSG00000132780	NASP	0.535872	ENSG00000116701	NCF2	0.0172876	ENSG00000130414	NDUFA10
																														ENSG00000023287	RB1CC1	0.0702645	ENSG00000101347	SAMHD1	0.105944	ENSG00000080815	PSEN1	0.258492	ENSG00000113269	RNF130	0.162551	ENSG00000120129	DUSP1	0.534347	ENSG00000160213	CSTB	0.0138891	ENSG00000179921	GPBAR1
																														ENSG00000133606	MKRN1	0.0698318	ENSG00000165678	GHITM	0.105944	ENSG00000168010	ATG16L2	0.258492	ENSG00000054148	PHPT1	0.162078	ENSG00000172216	CEBPB	0.526125	ENSG00000105835	NAMPT	0.0120106	ENSG00000084676	NCOA1
																														ENSG00000169714	CNBP	0.06981	ENSG00000157916	RER1	0.105944	ENSG00000134313	KIDINS220	0.258492	ENSG00000138279	ANXA7	0.162078	ENSG00000099977	DDT	0.5239	ENSG00000197766	CFD	0.000214133	ENSG00000162711	NLRP3
																														ENSG00000115310	RTN4	0.0696378	ENSG00000176340	COX8A	0.105944	ENSG00000160712	IL6R	0.258492	ENSG00000169045	HNRNPH1	0.161456	ENSG00000003056	M6PR	0.5239	ENSG00000263001	GTF2I	0.000214133	ENSG00000240972	MIF
																														ENSG00000163584	RPL22L1	0.0695728	ENSG00000125356	NDUFA1	0.105944	ENSG00000159322	ADPGK	0.257366	ENSG00000113648	H2AFY	0.161361	ENSG00000183726	TMEM50A	0.5239	ENSG00000243449	C4orf48	0.000214133	ENSG00000124762	CDKN1A
																														ENSG00000124126	PREX1	0.0695008	ENSG00000166598	HSP90B1	0.104081	ENSG00000113742	CPEB4	0.257366	ENSG00000171159	C9orf16	0.161134	ENSG00000160932	LY6E	0.518663	ENSG00000082153	BZW1	0.000214133	ENSG00000109332	UBE2D3
																														ENSG00000072062	PRKACA	0.0692812	ENSG00000099624	ATP5F1D	0.103789	ENSG00000244038	DDOST	0.257366	ENSG00000187239	FNBP1	0.160937	ENSG00000183255	PTTG1IP	0.513846				ENSG00000172216	CEBPB
																														ENSG00000176731	C8orf59	0.068786	ENSG00000100380	ST13	0.103577	ENSG00000103811	CTSH	0.257013	ENSG00000084623	EIF3I	0.160851	ENSG00000170638	TRABD	0.513846				ENSG00000182718	ANXA2
																														ENSG00000147202	DIAPH2	0.0686272	ENSG00000167088	SNRPD1	0.102585	ENSG00000127947	PTPN12	0.255404	ENSG00000126883	NUP214	0.160752	ENSG00000198355	PIM3	0.513846				ENSG00000104763	ASAH1
																														ENSG00000156411	ATP5MPL	0.0685804	ENSG00000084463	WBP11	0.102585	ENSG00000157916	RER1	0.255404	ENSG00000012660	ELOVL5	0.160328	ENSG00000101265	RASSF2	0.513846				ENSG00000145833	DDX46
																														ENSG00000068697	LAPTM4A	0.0681466	ENSG00000118515	SGK1	0.102332	ENSG00000099624	ATP5F1D	0.25511	ENSG00000111679	PTPN6	0.159994	ENSG00000185262	UBALD2	0.513846				ENSG00000168385	2021-09-02
																														ENSG00000134758	RNF138	0.0678378	ENSG00000105483	CARD8	0.102332	ENSG00000168028	RPSA	0.254545	ENSG00000077147	TM9SF3	0.159024	ENSG00000007237	GAS7	0.513846				ENSG00000136238	RAC1
																														ENSG00000104894	CD37	0.0673713	ENSG00000117523	PRRC2C	0.102142	ENSG00000112137	PHACTR1	0.254142	ENSG00000053254	FOXN3	0.158822	ENSG00000100528	CNIH1	0.513846				ENSG00000135535	CD164
																														ENSG00000168610	STAT3	0.0672672	ENSG00000166441	RPL27A	0.102111	ENSG00000153827	TRIP12	0.253754	ENSG00000112245	PTP4A1	0.158325	ENSG00000139505	MTMR6	0.513846				ENSG00000117091	CD48
																														ENSG00000011304	PTBP1	0.0665946	ENSG00000112531	QKI	0.101456	ENSG00000106052	TAX1BP1	0.252679	ENSG00000146386	ABRACL	0.158098	ENSG00000187164	SHTN1	0.513846				ENSG00000163131	CTSS
																														ENSG00000138592	USP8	0.066534	ENSG00000173436	MINOS1	0.10096	ENSG00000175354	PTPN2	0.252347	ENSG00000135269	TES	0.158016	ENSG00000077147	TM9SF3	0.513846				ENSG00000129226	CD68
																														ENSG00000081189	MEF2C	0.0653946	ENSG00000150977	RILPL2	0.10059	ENSG00000099783	HNRNPM	0.252347	ENSG00000241553	ARPC4	0.157484	ENSG00000156515	HK1	0.513846				ENSG00000141298	SSH2
																														ENSG00000146386	ABRACL	0.0652748	ENSG00000141002	TCF25	0.10033	ENSG00000198786	MT-ND5	0.252304	ENSG00000214026	MRPL23	0.157212	ENSG00000132274	TRIM22	0.513846				ENSG00000139343	SNRPF
																														ENSG00000140749	IGSF6	0.0651931	ENSG00000080371	RAB21	0.0997914	ENSG00000148737	TCF7L2	0.251134	ENSG00000106028	SSBP1	0.156959	ENSG00000147872	PLIN2	0.513846				ENSG00000143226	FCGR2A
																														ENSG00000213741	RPS29	0.0650744	ENSG00000142534	RPS11	0.0997742	ENSG00000110446	SLC15A3	0.251134	ENSG00000102879	CORO1A	0.155946	ENSG00000112773	TENT5A	0.513846				ENSG00000153310	FAM49B
																														ENSG00000169976	SF3B5	0.0650006	ENSG00000121774	KHDRBS1	0.0996573	ENSG00000108669	CYTH1	0.250587	ENSG00000086065	CHMP5	0.155158	ENSG00000198399	ITSN2	0.513846				ENSG00000093072	ADA2
																														ENSG00000105701	FKBP8	0.0648101	ENSG00000178741	COX5A	0.0993709	ENSG00000178719	GRINA	0.249596	ENSG00000153250	RBMS1	0.155158	ENSG00000116754	SRSF11	0.513846				ENSG00000130313	PGLS
																														ENSG00000175390	EIF3F	0.0645419	ENSG00000242485	MRPL20	0.0993709	ENSG00000136279	DBNL	0.249145	ENSG00000087086	FTL	0.154265	ENSG00000176731	C8orf59	0.513846				ENSG00000271614	ATP2B1-AS1
																														ENSG00000119314	PTBP3	0.0642445	ENSG00000185262	UBALD2	0.098712	ENSG00000119705	SLIRP	0.247942	ENSG00000187164	SHTN1	0.154209	ENSG00000241399	CD302	0.513846				ENSG00000173020	GRK2
																														ENSG00000069849	ATP1B3	0.0640161	ENSG00000160255	ITGB2	0.0984552	ENSG00000145703	IQGAP2	0.247942	ENSG00000163719	MTMR14	0.153307	ENSG00000197249	SERPINA1	0.511263				ENSG00000106605	BLVRA
																														ENSG00000105404	RABAC1	0.0639227	ENSG00000103035	PSMD7	0.0979063	ENSG00000113811	SELENOK	0.247585	ENSG00000150593	PDCD4	0.152679	ENSG00000213654	GPSM3	0.507993				ENSG00000198830	HMGN2
																														ENSG00000112245	PTP4A1	0.0637217	ENSG00000177600	RPLP2	0.097824	ENSG00000169896	ITGAM	0.247246	ENSG00000131171	SH3BGRL	0.152542	ENSG00000107341	UBE2R2	0.505284				ENSG00000198899	MT-ATP6
																														ENSG00000134294	SLC38A2	0.0629437	ENSG00000186407	CD300E	0.0975732	ENSG00000059377	TBXAS1	0.246618	ENSG00000110717	NDUFS8	0.152449	ENSG00000155366	RHOC	0.505284				ENSG00000140941	MAP1LC3B
																														ENSG00000108107	RPL28	0.0624963	ENSG00000198899	MT-ATP6	0.0975166	ENSG00000126777	KTN1	0.245786	ENSG00000067829	IDH3G	0.151236	ENSG00000167552	TUBA1A	0.502706				ENSG00000155465	SLC7A7
																														ENSG00000141505	ASGR1	0.0615788	ENSG00000131236	CAP1	0.0974775	ENSG00000171700	RGS19	0.244044	ENSG00000111252	SH2B3	0.151106	ENSG00000118816	CCNI	0.501462				ENSG00000074800	ENO1
																														ENSG00000105583	WDR83OS	0.0614753	ENSG00000155463	OXA1L	0.0968985	ENSG00000162191	UBXN1	0.244044	ENSG00000082074	FYB1	0.15096	ENSG00000177885	GRB2	0.497905				ENSG00000196562	SULF2
																														ENSG00000257923	CUX1	0.0613313	ENSG00000108107	RPL28	0.0967081	ENSG00000068697	LAPTM4A	0.243864	ENSG00000125835	SNRPB	0.150105	ENSG00000172531	PPP1CA	0.497905				ENSG00000172531	PPP1CA
																														ENSG00000196504	PRPF40A	0.0611245	ENSG00000260032	NORAD	0.0965449	ENSG00000231389	HLA-DPA1	0.243814	ENSG00000165233	CARD19	0.150105	ENSG00000108424	KPNB1	0.497905				ENSG00000146701	MDH2
																														ENSG00000173020	GRK2	0.0598196	ENSG00000197102	DYNC1H1	0.0965449	ENSG00000129003	VPS13C	0.242638	ENSG00000145907	G3BP1	0.150105	ENSG00000254505	CHMP4A	0.497905				ENSG00000116044	NFE2L2
																														ENSG00000149923	PPP4C	0.0598005	ENSG00000168769	TET2	0.0965449	ENSG00000158195	WASF2	0.241913	ENSG00000180353	HCLS1	0.150105	ENSG00000088992	TESC	0.497905				ENSG00000115128	SF3B6
																														ENSG00000213585	VDAC1	0.0590676	ENSG00000088205	DDX18	0.0964522	ENSG00000009307	CSDE1	0.241043	ENSG00000081237	PTPRC	0.150105	ENSG00000173113	TRMT112	0.497905				ENSG00000143106	PSMA5
																														ENSG00000124357	NAGK	0.0590338	ENSG00000135049	AGTPBP1	0.0962934	ENSG00000196352	CD55	0.24057	ENSG00000162909	CAPN2	0.149253	ENSG00000120992	LYPLA1	0.497905				ENSG00000060138	YBX3
																														ENSG00000173221	GLRX	0.058804	ENSG00000160712	IL6R	0.0962934	ENSG00000196262	PPIA	0.23733	ENSG00000114353	GNAI2	0.148678	ENSG00000163349	HIPK1	0.497905				ENSG00000197622	CDC42SE1
																														ENSG00000155465	SLC7A7	0.058804	ENSG00000136527	TRA2B	0.0958644	ENSG00000198938	MT-CO3	0.235313	ENSG00000138071	ACTR2	0.148057	ENSG00000173915	ATP5MD	0.497905				ENSG00000183283	DAZAP2
																														ENSG00000146112	PPP1R18	0.0586861	ENSG00000180370	PAK2	0.0956935	ENSG00000134046	MBD2	0.234645	ENSG00000114013	CD86	0.146948	ENSG00000167996	FTH1	0.489936				ENSG00000196352	CD55
																														ENSG00000162924	REL	0.0586758	ENSG00000215301	DDX3X	0.0954947	ENSG00000132205	EMILIN2	0.234645	ENSG00000105835	NAMPT	0.146875	ENSG00000196154	S100A4	0.487768				ENSG00000101439	CST3
																														ENSG00000103653	CSK	0.05799	ENSG00000021355	SERPINB1	0.0940134	ENSG00000189159	JPT1	0.234645	ENSG00000095380	NANS	0.146253	ENSG00000177156	TALDO1	0.485832				ENSG00000176845	METRNL
																														ENSG00000159216	RUNX1	0.0579662	ENSG00000181467	RAP2B	0.0937431	ENSG00000010244	ZNF207	0.234645	ENSG00000106052	TAX1BP1	0.145947	ENSG00000221963	APOL6	0.485832				ENSG00000035862	TIMP2
																														ENSG00000160948	VPS28	0.0576452	ENSG00000006015	REX1BD	0.0936653	ENSG00000073921	PICALM	0.234645	ENSG00000135241	PNPLA8	0.145776	ENSG00000076662	ICAM3	0.485832				ENSG00000198399	ITSN2
																														ENSG00000165168	CYBB	0.0570396	ENSG00000174917	C19orf70	0.0933436	ENSG00000005893	LAMP2	0.234645	ENSG00000087266	SH3BP2	0.145589	ENSG00000168961	LGALS9	0.485832				ENSG00000103035	PSMD7
																														ENSG00000175826	CTDNEP1	0.0556887	ENSG00000117984	CTSD	0.0931574	ENSG00000152795	HNRNPDL	0.234645	ENSG00000172590	MRPL52	0.145164	ENSG00000134884	ARGLU1	0.485832				ENSG00000103342	GSPT1
																														ENSG00000143546	S100A8	0.0554242	ENSG00000173334	TRIB1	0.0930045	ENSG00000163939	PBRM1	0.234645	ENSG00000005483	KMT2E	0.144868	ENSG00000178695	KCTD12	0.485832				ENSG00000168310	IRF2
																														ENSG00000120727	PAIP2	0.0550846	ENSG00000093010	COMT	0.0927682	ENSG00000105701	FKBP8	0.234645	ENSG00000141522	ARHGDIA	0.14465	ENSG00000107290	SETX	0.485832				ENSG00000204257	HLA-DMA
																														ENSG00000112343	TRIM38	0.0543303	ENSG00000178209	PLEC	0.0922687	ENSG00000217555	CKLF	0.234645	ENSG00000126457	PRMT1	0.144351	ENSG00000253729	PRKDC	0.485832				ENSG00000111275	ALDH2
																														ENSG00000055609	KMT2C	0.0536763	ENSG00000137210	TMEM14B	0.0922687	ENSG00000110876	SELPLG	0.234645	ENSG00000136238	RAC1	0.144313	ENSG00000010404	IDS	0.485832				ENSG00000167658	EEF2
																														ENSG00000168259	DNAJC7	0.0532973	ENSG00000187608	ISG15	0.091444	ENSG00000116044	NFE2L2	0.234645	ENSG00000119335	SET	0.144198	ENSG00000135241	PNPLA8	0.485832				ENSG00000087460	GNAS
																														ENSG00000180879	SSR4	0.0531455	ENSG00000135655	USP15	0.0907914	ENSG00000125995	ROMO1	0.234645	ENSG00000172216	CEBPB	0.143643	ENSG00000106605	BLVRA	0.485832				ENSG00000136826	KLF4
																														ENSG00000175354	PTPN2	0.052678	ENSG00000167526	RPL13	0.090437	ENSG00000266412	NCOA4	0.234645	ENSG00000164169	PRMT9	0.143219	ENSG00000145416	2021-03-01	0.485832				ENSG00000124126	PREX1
																														ENSG00000134250	NOTCH2	0.0526354	ENSG00000123384	LRP1	0.0904027	ENSG00000178209	PLEC	0.234645	ENSG00000171490	RSL1D1	0.143219	ENSG00000161203	AP2M1	0.485832				ENSG00000205937	RNPS1
																														ENSG00000136888	ATP6V1G1	0.0517671	ENSG00000198886	MT-ND4	0.0901814	ENSG00000023287	RB1CC1	0.234645	ENSG00000164548	TRA2A	0.142345	ENSG00000163939	PBRM1	0.485832				ENSG00000102580	DNAJC3
																														ENSG00000112715	VEGFA	0.0514832	ENSG00000060237	WNK1	0.0900772	ENSG00000146112	PPP1R18	0.234645	ENSG00000145779	TNFAIP8	0.142178	ENSG00000060971	ACAA1	0.485832				ENSG00000161642	ZNF385A
																														ENSG00000100380	ST13	0.0509244	ENSG00000163131	CTSS	0.0897535	ENSG00000144848	ATG3	0.234645	ENSG00000135940	COX5B	0.141837	ENSG00000115128	SF3B6	0.485832				ENSG00000166275	BORCS7
																														ENSG00000117592	PRDX6	0.0508647	ENSG00000204397	CARD16	0.0885615	ENSG00000084090	STARD7	0.234645	ENSG00000147140	NONO	0.14153	ENSG00000069275	NUCKS1	0.485832				ENSG00000118564	FBXL5
																														ENSG00000116473	RAP1A	0.0508218	ENSG00000198843	SELENOT	0.0884258	ENSG00000117450	PRDX1	0.234645	ENSG00000028137	TNFRSF1B	0.141335	ENSG00000143183	TMCO1	0.485832				ENSG00000117228	GBP1
																														ENSG00000008130	NADK	0.0506161	ENSG00000100219	XBP1	0.0882416	ENSG00000175416	CLTB	0.234645	ENSG00000197006	METTL9	0.141088	ENSG00000116586	LAMTOR2	0.485832				ENSG00000185651	UBE2L3
																														ENSG00000169223	LMAN2	0.0505119	ENSG00000086666	ZFAND6	0.0882416	ENSG00000183283	DAZAP2	0.229969	ENSG00000198804	MT-CO1	0.140745	ENSG00000163399	ATP1A1	0.485832				ENSG00000165678	GHITM
																														ENSG00000166012	TAF1D	0.0499159	ENSG00000277443	MARCKS	0.0878673	ENSG00000127540	UQCR11	0.229627	ENSG00000143198	MGST3	0.140332	ENSG00000136167	LCP1	0.482027				ENSG00000120616	EPC1
																														ENSG00000132475	H3F3B	0.0496196	ENSG00000048740	CELF2	0.0873026	ENSG00000198804	MT-CO1	0.229285	ENSG00000152061	RABGAP1L	0.13971	ENSG00000182196	ARL6IP4	0.476371				ENSG00000114353	GNAI2
																														ENSG00000243449	C4orf48	0.0495827	ENSG00000114391	RPL24	0.0870822	ENSG00000242574	HLA-DMB	0.226868	ENSG00000107581	EIF3A	0.139057	ENSG00000091527	CDV3	0.476371				ENSG00000107099	DOCK8
																														ENSG00000108953	YWHAE	0.048443	ENSG00000137876	RSL24D1	0.0868348	ENSG00000035862	TIMP2	0.225368	ENSG00000060971	ACAA1	0.138745	ENSG00000173442	EHBP1L1	0.476371				ENSG00000135604	STX11
																														ENSG00000116030	SUMO1	0.0484185	ENSG00000197006	METTL9	0.0857304	ENSG00000141522	ARHGDIA	0.224377	ENSG00000119900	OGFRL1	0.138095	ENSG00000129128	SPCS3	0.476371				ENSG00000197746	PSAP
																														ENSG00000126067	PSMB2	0.0482976	ENSG00000169045	HNRNPH1	0.0847271	ENSG00000186184	POLR1D	0.223919	ENSG00000100221	JOSD1	0.138032	ENSG00000146278	PNRC1	0.474318				ENSG00000158195	WASF2
																														ENSG00000160131	VMA21	0.0482295	ENSG00000135046	ANXA1	0.0841392	ENSG00000133961	NUMB	0.221589	ENSG00000116171	SCP2	0.137741	ENSG00000156411	ATP5MPL	0.47237				ENSG00000186010	NDUFA13
																														ENSG00000109332	UBE2D3	0.0479382	ENSG00000110876	SELPLG	0.0838208	ENSG00000197622	CDC42SE1	0.221589	ENSG00000158417	EIF5B	0.137049	ENSG00000198804	MT-CO1	0.471594				ENSG00000229833	PET100
																														ENSG00000172270	BSG	0.0479028	ENSG00000112851	ERBIN	0.083417	ENSG00000038427	VCAN	0.220918	ENSG00000165119	HNRNPK	0.137049	ENSG00000197943	PLCG2	0.471125				ENSG00000205220	PSMB10
																														ENSG00000075426	FOSL2	0.0476057	ENSG00000114353	GNAI2	0.0816143	ENSG00000171634	BPTF	0.219539	ENSG00000159658	EFCAB14	0.136542	ENSG00000170906	NDUFA3	0.468758				ENSG00000137845	ADAM10
																														ENSG00000140990	NDUFB10	0.047446	ENSG00000134825	TMEM258	0.0814906	ENSG00000163931	TKT	0.218844	ENSG00000167552	TUBA1A	0.135747	ENSG00000062716	VMP1	0.468758				ENSG00000149100	EIF3M
																														ENSG00000159720	ATP6V0D1	0.0474423	ENSG00000104904	OAZ1	0.0808692	ENSG00000122359	ANXA11	0.218526	ENSG00000111276	CDKN1B	0.135605	ENSG00000205302	SNX2	0.468758				ENSG00000147274	RBMX
																														ENSG00000072135	PTPN18	0.0473937	ENSG00000115268	RPS15	0.0806777	ENSG00000146701	MDH2	0.218526	ENSG00000172531	PPP1CA	0.135232	ENSG00000135821	GLUL	0.468758				ENSG00000130741	EIF2S3
																														ENSG00000185201	IFITM2	0.0470474	ENSG00000142937	RPS8	0.0802071	ENSG00000111832	RWDD1	0.217967	ENSG00000159352	PSMD4	0.134961	ENSG00000117616	RSRP1	0.468758				ENSG00000099817	POLR2E
																														ENSG00000198938	MT-CO3	0.0469064	ENSG00000116489	CAPZA1	0.0801805	ENSG00000113712	CSNK1A1	0.217367	ENSG00000112531	QKI	0.134838	ENSG00000132475	H3F3B	0.464458				ENSG00000172270	BSG
																														ENSG00000088832	FKBP1A	0.0467762	ENSG00000198265	HELZ	0.0794714	ENSG00000170873	MTSS1	0.216724	ENSG00000069849	ATP1B3	0.13328	ENSG00000183648	NDUFB1	0.462499				ENSG00000053254	FOXN3
																														ENSG00000100612	DHRS7	0.0466702	ENSG00000111897	SERINC1	0.0794714	ENSG00000106780	MEGF9	0.216724	ENSG00000140836	ZFHX3	0.132039	ENSG00000165119	HNRNPK	0.45977				ENSG00000004700	RECQL
																														ENSG00000115232	ITGA4	0.0466482	ENSG00000206503	HLA-A	0.0791675	ENSG00000146729	NIPSNAP2	0.21528	ENSG00000171735	CAMTA1	0.132039	ENSG00000234745	HLA-B	0.457703				ENSG00000077147	TM9SF3
																														ENSG00000266094	RASSF5	0.0465901	ENSG00000152795	HNRNPDL	0.0786363	ENSG00000172795	DCP2	0.21528	ENSG00000153113	CAST	0.130819	ENSG00000163162	RNF149	0.452817				ENSG00000165494	PCF11
																														ENSG00000135821	GLUL	0.0465488	ENSG00000161921	CXCL16	0.0786363	ENSG00000172243	CLEC7A	0.214468	ENSG00000147274	RBMX	0.13074	ENSG00000125148	MT2A	0.450208				ENSG00000185627	PSMD13
																														ENSG00000100664	EIF5	0.0464551	ENSG00000198604	BAZ1A	0.0781986	ENSG00000105438	KDELR1	0.214468	ENSG00000130731	METTL26	0.130067	ENSG00000198712	MT-CO2	0.449178				ENSG00000086730	LAT2
																														ENSG00000147677	EIF3H	0.0462891	ENSG00000139112	GABARAPL1	0.0781199	ENSG00000129351	ILF3	0.213584	ENSG00000172270	BSG	0.129461	ENSG00000155957	TMBIM4	0.448995				ENSG00000112305	SMAP1
																														ENSG00000125356	NDUFA1	0.0459633	ENSG00000173726	TOMM20	0.0780768	ENSG00000135018	UBQLN1	0.213584	ENSG00000150681	RGS18	0.129271	ENSG00000140941	MAP1LC3B	0.445675				ENSG00000174720	LARP7
																														ENSG00000167283	ATP5MG	0.045923	ENSG00000131238	PPT1	0.077051	ENSG00000065526	SPEN	0.213584	ENSG00000151923	TIAL1	0.128911	ENSG00000167004	PDIA3	0.445675				ENSG00000198843	SELENOT
																														ENSG00000065548	ZC3H15	0.045744	ENSG00000115875	SRSF7	0.0764245	ENSG00000085514	PILRA	0.213584	ENSG00000159210	SNF8	0.128253	ENSG00000169045	HNRNPH1	0.445675				ENSG00000162772	ATF3
																														ENSG00000019582	CD74	0.0456664	ENSG00000131171	SH3BGRL	0.075729	ENSG00000150093	ITGB1	0.212278	ENSG00000172809	RPL38	0.128095	ENSG00000129559	NEDD8	0.442763				ENSG00000198804	MT-CO1
																														ENSG00000182196	ARL6IP4	0.0455457	ENSG00000156256	USP16	0.0756858	ENSG00000198712	MT-CO2	0.211605	ENSG00000130402	ACTN4	0.127952	ENSG00000069849	ATP1B3	0.442763				ENSG00000122862	SRGN
																														ENSG00000112851	ERBIN	0.0453432	ENSG00000140740	UQCRC2	0.0742347	ENSG00000069345	DNAJA2	0.211562	ENSG00000073756	PTGS2	0.127633	ENSG00000108654	DDX5	0.44068				ENSG00000030582	GRN
																														ENSG00000106153	CHCHD2	0.0451387	ENSG00000100823	APEX1	0.0742347	ENSG00000076641	PAG1	0.211562	ENSG00000119318	RAD23B	0.127531	ENSG00000134825	TMEM258	0.440189				ENSG00000143549	TPM3
																														ENSG00000198899	MT-ATP6	0.0450509	ENSG00000150779	TIMM8B	0.0735221	ENSG00000165175	MID1IP1	0.211562	ENSG00000142192	APP	0.127144	ENSG00000197746	PSAP	0.434895				ENSG00000130755	GMFG
																														ENSG00000123066	MED13L	0.0448789	ENSG00000105404	RABAC1	0.0732394	ENSG00000005339	CREBBP	0.210398	ENSG00000122034	GTF3A	0.126961	ENSG00000081237	PTPRC	0.431159				ENSG00000170144	HNRNPA3
																														ENSG00000099783	HNRNPM	0.0447542	ENSG00000140988	RPS2	0.0725779	ENSG00000132507	EIF5A	0.209771	ENSG00000006652	IFRD1	0.126672	ENSG00000123146	ADGRE5	0.43079				ENSG00000126458	RRAS
																														ENSG00000117425	PTCH2	0.0447542	ENSG00000132963	POMP	0.0721666	ENSG00000145833	DDX46	0.209771	ENSG00000257923	CUX1	0.126454	ENSG00000150991	UBC	0.43043				ENSG00000103187	COTL1
																														ENSG00000225921	NOL7	0.0445509	ENSG00000029363	BCLAF1	0.0720787	ENSG00000273559	CWC25	0.20911	ENSG00000137409	MTCH1	0.125857	ENSG00000070756	PABPC1	0.428116				ENSG00000157873	TNFRSF14
																														ENSG00000144746	ARL6IP5	0.0444408	ENSG00000213741	RPS29	0.0715101	ENSG00000121741	ZMYM2	0.20911	ENSG00000075785	RAB7A	0.125025	ENSG00000124942	AHNAK	0.422216				ENSG00000139218	SCAF11
																														ENSG00000002586	CD99	0.0441699	ENSG00000118181	RPS25	0.0713981	ENSG00000138185	ENTPD1	0.20911	ENSG00000093072	ADA2	0.124879	ENSG00000142669	SH3BGRL3	0.405564				ENSG00000149357	LAMTOR1
																														ENSG00000011422	PLAUR	0.0441658	ENSG00000142507	PSMB6	0.0712975	ENSG00000111843	TMEM14C	0.20911	ENSG00000213585	VDAC1	0.124603	ENSG00000154518	ATP5MC3	0.398369				ENSG00000213741	RPS29
																														ENSG00000113387	SUB1	0.0439413	ENSG00000198712	MT-CO2	0.0709677	ENSG00000135677	GNS	0.20911	ENSG00000101558	VAPA	0.12411	ENSG00000134996	OSTF1	0.398369				ENSG00000204642	HLA-F
																														ENSG00000171700	RGS19	0.0437637	ENSG00000150991	UBC	0.0706216	ENSG00000196954	CASP4	0.208414	ENSG00000104325	DECR1	0.123942	ENSG00000118508	RAB32	0.398369				ENSG00000105379	ETFB
																														ENSG00000021355	SERPINB1	0.0436296	ENSG00000087302	RTRAF	0.0694177	ENSG00000121774	KHDRBS1	0.208414	ENSG00000132824	SERINC3	0.123784	ENSG00000180353	HCLS1	0.398369				ENSG00000155957	TMBIM4
																														ENSG00000166913	YWHAB	0.0433021	ENSG00000105583	WDR83OS	0.0694177	ENSG00000100632	ERH	0.2069	ENSG00000131446	MGAT1	0.123784	ENSG00000182670	TTC3	0.398369				ENSG00000134072	CAMK1
																														ENSG00000136279	DBNL	0.0432807	ENSG00000117450	PRDX1	0.0681115	ENSG00000140575	IQGAP1	0.206076	ENSG00000204525	HLA-C	0.123257	ENSG00000074842	MYDGF	0.398369				ENSG00000067066	SP100
																														ENSG00000160888	IER2	0.0431681	ENSG00000156273	BACH1	0.0679757	ENSG00000003402	CFLAR	0.206076	ENSG00000005302	MSL3	0.123222	ENSG00000153774	CFDP1	0.398369				ENSG00000266472	MRPS21
																														ENSG00000147872	PLIN2	0.0430547	ENSG00000116701	NCF2	0.0673986	ENSG00000197006	METTL9	0.205499	ENSG00000091317	CMTM6	0.122978	ENSG00000185896	LAMP1	0.398369				ENSG00000130303	BST2
																														ENSG00000142507	PSMB6	0.0427132	ENSG00000241837	ATP5PO	0.0672401	ENSG00000204592	HLA-E	0.205381	ENSG00000135506	OS9	0.12236	ENSG00000150593	PDCD4	0.398369				ENSG00000197943	PLCG2
																														ENSG00000042753	AP2S1	0.042466	ENSG00000146007	ZMAT2	0.0669495	ENSG00000110077	MS4A6A	0.20451	ENSG00000167658	EEF2	0.121996	ENSG00000148730	EIF4EBP2	0.398369				ENSG00000135241	PNPLA8
																														ENSG00000089327	FXYD5	0.0423967	ENSG00000168374	ARF4	0.0669495	ENSG00000089737	DDX24	0.204272	ENSG00000129226	CD68	0.120789	ENSG00000180817	PPA1	0.398369				ENSG00000162909	CAPN2
																														ENSG00000125977	EIF2S2	0.0419231	ENSG00000257103	LSM14A	0.0667084	ENSG00000106400	ZNHIT1	0.204272	ENSG00000242485	MRPL20	0.120372	ENSG00000151702	FLI1	0.398369				ENSG00000136250	AOAH
																														ENSG00000124795	DEK	0.0417026	ENSG00000134644	PUM1	0.0667084	ENSG00000153147	SMARCA5	0.204272	ENSG00000231925	TAPBP	0.120152	ENSG00000137486	ARRB1	0.398369				ENSG00000132475	H3F3B
																														ENSG00000136942	RPL35	0.0413363	ENSG00000143226	FCGR2A	0.0664152	ENSG00000168653	NDUFS5	0.204272	ENSG00000124783	SSR1	0.120054	ENSG00000135387	CAPRIN1	0.398369				ENSG00000111237	VPS29
																														ENSG00000197451	HNRNPAB	0.041277	ENSG00000156508	EEF1A1	0.0659155	ENSG00000165168	CYBB	0.204014	ENSG00000067167	TRAM1	0.119881	ENSG00000179119	SPTY2D1	0.398369				ENSG00000008988	RPS20
																														ENSG00000115271	GCA	0.0411836	ENSG00000110324	IL10RA	0.0655859	ENSG00000089157	RPLP0	0.203697	ENSG00000114978	MOB1A	0.119155	ENSG00000185507	IRF7	0.398369				ENSG00000103363	ELOB
																														ENSG00000138744	NAAA	0.0409997	ENSG00000159322	ADPGK	0.0655859	ENSG00000159199	ATP5MC1	0.202224	ENSG00000163131	CTSS	0.11862	ENSG00000181404	WASHC1	0.398369				ENSG00000171858	RPS21
																														ENSG00000092820	EZR	0.0404519	ENSG00000125971	DYNLRB1	0.0649718	ENSG00000102879	CORO1A	0.202224	ENSG00000140299	BNIP2	0.117683	ENSG00000147251	DOCK11	0.398369				ENSG00000136819	C9orf78
																														ENSG00000160255	ITGB2	0.0404443	ENSG00000084070	SMAP2	0.0649718	ENSG00000120690	ELF1	0.201479	ENSG00000257103	LSM14A	0.117683	ENSG00000154978	VOPP1	0.398369				ENSG00000107341	UBE2R2
																														ENSG00000265241	RBM8A	0.0404244	ENSG00000163584	RPL22L1	0.06444	ENSG00000198856	OSTC	0.201093	ENSG00000048052	HDAC9	0.117683	ENSG00000105953	OGDH	0.398369				ENSG00000143774	GUK1
																														ENSG00000139433	GLTP	0.0403571	ENSG00000004059	ARF5	0.0641234	ENSG00000157557	ETS2	0.19988	ENSG00000067064	IDI1	0.117683	ENSG00000065883	CDK13	0.398369				ENSG00000105254	TBCB
																														ENSG00000165494	PCF11	0.0401349	ENSG00000196504	PRPF40A	0.0641234	ENSG00000101421	CHMP4B	0.198576	ENSG00000055609	KMT2C	0.117683	ENSG00000113719	ERGIC1	0.398369				ENSG00000257103	LSM14A
																														ENSG00000211450	SELENOH	0.0398305	ENSG00000106617	PRKAG2	0.0641234	ENSG00000078140	UBE2K	0.198576	ENSG00000184203	PPP1R2	0.117683	ENSG00000155506	LARP1	0.398369				ENSG00000141759	TXNL4A
																														ENSG00000163660	CCNL1	0.0395134	ENSG00000141505	ASGR1	0.0641234	ENSG00000163584	RPL22L1	0.198576	ENSG00000144224	UBXN4	0.117683	ENSG00000132463	GRSF1	0.398369				ENSG00000013364	MVP
																														ENSG00000139083	ETV6	0.0394374	ENSG00000070831	CDC42	0.0633517	ENSG00000142168	SOD1	0.195117	ENSG00000113916	BCL6	0.117683	ENSG00000163728	TTC14	0.398369				ENSG00000088992	TESC
																														ENSG00000005059	MCUB	0.0390889	ENSG00000143669	LYST	0.0630622	ENSG00000159388	BTG2	0.194781	ENSG00000042753	AP2S1	0.117683	ENSG00000134072	CAMK1	0.398369				ENSG00000176853	FAM91A1
																														ENSG00000085224	ATRX	0.0388238	ENSG00000115541	HSPE1	0.0628749	ENSG00000165030	NFIL3	0.194003	ENSG00000171222	SCAND1	0.117683	ENSG00000134108	ARL8B	0.398369				ENSG00000145703	IQGAP2
																														ENSG00000163683	SMIM14	0.0385357	ENSG00000157106	SMG1	0.0628749	ENSG00000084463	WBP11	0.194003	ENSG00000182774	RPS17	0.117683	ENSG00000116095	PLEKHA3	0.398369				ENSG00000162923	WDR26
																														ENSG00000184897	H1FX	0.0384153	ENSG00000112697	TMEM30A	0.0616543	ENSG00000122705	CLTA	0.193126	ENSG00000164919	COX6C	0.116833	ENSG00000134644	PUM1	0.398369				ENSG00000101160	CTSZ
																														ENSG00000137575	SDCBP	0.0381265	ENSG00000126067	PSMB2	0.0616543	ENSG00000198624	CCDC69	0.19221	ENSG00000134333	LDHA	0.115997	ENSG00000138964	PARVG	0.398369				ENSG00000070831	CDC42
																														ENSG00000146066	HIGD2A	0.0377641	ENSG00000113558	SKP1	0.0613534	ENSG00000133706	LARS	0.19221	ENSG00000116701	NCF2	0.115923	ENSG00000161921	CXCL16	0.398369				ENSG00000171051	FPR1
																														ENSG00000150991	UBC	0.0376376	ENSG00000167461	RAB8A	0.0608557	ENSG00000153815	CMIP	0.191577	ENSG00000084207	GSTP1	0.115453	ENSG00000066654	THUMPD1	0.398369				ENSG00000134046	MBD2
																														ENSG00000186517	ARHGAP30	0.0375766	ENSG00000162511	LAPTM5	0.0606528	ENSG00000182196	ARL6IP4	0.191577	ENSG00000214253	FIS1	0.115086	ENSG00000182831	C16orf72	0.398369				ENSG00000112695	COX7A2
																														ENSG00000084754	HADHA	0.0375109	ENSG00000143549	TPM3	0.0605396	ENSG00000146731	CCT6A	0.191577	ENSG00000101182	PSMA7	0.115029	ENSG00000167173	C15orf39	0.398369				ENSG00000152601	MBNL1
																														ENSG00000100387	RBX1	0.0370548	ENSG00000171530	TBCA	0.0605122	ENSG00000078674	PCM1	0.190251	ENSG00000244038	DDOST	0.114177	ENSG00000120686	UFM1	0.398369				ENSG00000100380	ST13
																														ENSG00000111775	COX6A1	0.0364527	ENSG00000198786	MT-ND5	0.0604883	ENSG00000115241	PPM1G	0.190251	ENSG00000179010	MRFAP1	0.113841	ENSG00000060237	WNK1	0.398369				ENSG00000125971	DYNLRB1
																														ENSG00000135404	CD63	0.0362257	ENSG00000125977	EIF2S2	0.0603914	ENSG00000091317	CMTM6	0.189733	ENSG00000213064	SFT2D2	0.113841	ENSG00000165669	FAM204A	0.398369				ENSG00000108256	NUFIP2
																														ENSG00000005339	CREBBP	0.0360017	ENSG00000111229	ARPC3	0.0599464	ENSG00000221963	APOL6	0.188103	ENSG00000134056	MRPS36	0.113278	ENSG00000204370	SDHD	0.398369				ENSG00000091039	OSBPL8
																														ENSG00000197629	MPEG1	0.0353265	ENSG00000102007	PLP2	0.0597352	ENSG00000141505	ASGR1	0.18734	ENSG00000212907	MT-ND4L	0.112801	ENSG00000133318	RTN3	0.398369				ENSG00000164032	H2AFZ
																														ENSG00000131143	COX4I1	0.0350496	ENSG00000136521	NDUFB5	0.0596499	ENSG00000164548	TRA2A	0.18734	ENSG00000213654	GPSM3	0.112595	ENSG00000149187	CELF1	0.398369				ENSG00000170345	FOS
																														ENSG00000111729	CLEC4A	0.0349577	ENSG00000143742	SRP9	0.0596499	ENSG00000189403	HMGB1	0.185996	ENSG00000172349	IL16	0.11229	ENSG00000166326	TRIM44	0.398369				ENSG00000176340	COX8A
																														ENSG00000139644	TMBIM6	0.0345676	ENSG00000204628	RACK1	0.0596093	ENSG00000143222	UFC1	0.185736	ENSG00000075624	ACTB	0.111913	ENSG00000147123	NDUFB11	0.398369				ENSG00000168259	DNAJC7
																														ENSG00000176788	BASP1	0.0342852	ENSG00000100353	EIF3D	0.0577763	ENSG00000117614	SYF2	0.185736	ENSG00000146701	MDH2	0.111609	ENSG00000049618	ARID1B	0.398369				ENSG00000108561	C1QBP
																														ENSG00000158985	CDC42SE2	0.034207	ENSG00000135334	AKIRIN2	0.0577763	ENSG00000160216	AGPAT3	0.185736	ENSG00000111639	MRPL51	0.111451	ENSG00000123933	MXD4	0.398369				ENSG00000138592	USP8
																														ENSG00000155096	AZIN1	0.0338289	ENSG00000117500	TMED5	0.0576192	ENSG00000177879	AP3S1	0.185736	ENSG00000152601	MBNL1	0.110989	ENSG00000114850	SSR3	0.398369				ENSG00000120675	DNAJC15
																														ENSG00000143376	SNX27	0.0334648	ENSG00000111348	ARHGDIB	0.0575806	ENSG00000085491	SLC25A24	0.185736	ENSG00000107372	ZFAND5	0.109906	ENSG00000119820	YIPF4	0.398369				ENSG00000147123	NDUFB11
																														ENSG00000173334	TRIB1	0.0328632	ENSG00000130332	LSM7	0.057034	ENSG00000105193	RPS16	0.185564	ENSG00000198886	MT-ND4	0.109905	ENSG00000116604	MEF2D	0.398369				ENSG00000126524	SBDS
																														ENSG00000105372	RPS19	0.032534	ENSG00000075624	ACTB	0.0570184	ENSG00000107968	MAP3K8	0.184892	ENSG00000129562	DAD1	0.109821	ENSG00000167615	LENG8	0.398369				ENSG00000113282	CLINT1
																														ENSG00000097033	SH3GLB1	0.0313002	ENSG00000117713	ARID1A	0.0563022	ENSG00000197746	PSAP	0.184701	ENSG00000160075	SSU72	0.10886	ENSG00000125971	DYNLRB1	0.398369				ENSG00000113441	LNPEP
																														ENSG00000067560	RHOA	0.0310646	ENSG00000161547	SRSF2	0.0554785	ENSG00000111642	CHD4	0.184019	ENSG00000115350	POLE4	0.108285	ENSG00000101421	CHMP4B	0.398369				ENSG00000084623	EIF3I
																														ENSG00000165175	MID1IP1	0.0310216	ENSG00000083799	CYLD	0.0552238	ENSG00000107099	DOCK8	0.183662	ENSG00000116489	CAPZA1	0.107902	ENSG00000082397	EPB41L3	0.398369				ENSG00000089327	FXYD5
																														ENSG00000078304	PPP2R5C	0.0308516	ENSG00000107262	BAG1	0.0552238	ENSG00000104805	NUCB1	0.183115	ENSG00000075426	FOSL2	0.107699	ENSG00000126860	EVI2A	0.398369				ENSG00000108953	YWHAE
																														ENSG00000136560	TANK	0.030668	ENSG00000118508	RAB32	0.0544674	ENSG00000005022	SLC25A5	0.182863	ENSG00000147548	NSD3	0.107036	ENSG00000166595	FAM96B	0.398369				ENSG00000105835	NAMPT
																														ENSG00000075415	SLC25A3	0.0298083	ENSG00000126267	COX6B1	0.0541822	ENSG00000104915	STX10	0.180198	ENSG00000022277	RTF2	0.107036	ENSG00000013364	MVP	0.398369				ENSG00000143119	CD53
																														ENSG00000161203	AP2M1	0.0296488	ENSG00000140299	BNIP2	0.0540288	ENSG00000119318	RAD23B	0.180198	ENSG00000134186	PRPF38B	0.106712	ENSG00000100567	PSMA3	0.398369				ENSG00000100138	SNU13
																														ENSG00000198918	RPL39	0.0296438	ENSG00000143977	SNRPG	0.0539693	ENSG00000076944	STXBP2	0.180198	ENSG00000088832	FKBP1A	0.106616	ENSG00000165678	GHITM	0.398369				ENSG00000159840	ZYX
																														ENSG00000198755	RPL10A	0.0295186	ENSG00000085514	PILRA	0.0538209	ENSG00000241399	CD302	0.180198	ENSG00000137265	IRF4	0.106543	ENSG00000119397	CNTRL	0.398369				ENSG00000114942	EEF1B2
																														ENSG00000187735	TCEA1	0.029484	ENSG00000188612	SUMO2	0.0533047	ENSG00000186517	ARHGAP30	0.180198	ENSG00000099901	RANBP1	0.106368	ENSG00000104312	RIPK2	0.398369				ENSG00000123416	TUBA1B
																														ENSG00000117410	ATP6V0B	0.0293156	ENSG00000121691	CAT	0.0530487	ENSG00000111348	ARHGDIB	0.179833	ENSG00000241837	ATP5PO	0.106002	ENSG00000133606	MKRN1	0.398369				ENSG00000157106	SMG1
																														ENSG00000168003	SLC3A2	0.0289649	ENSG00000169413	RNASE6	0.0529505	ENSG00000164924	YWHAZ	0.179833	ENSG00000164190	NIPBL	0.105611	ENSG00000128534	LSM8	0.398369				ENSG00000167522	ANKRD11
																														ENSG00000166128	RAB8B	0.0286165	ENSG00000168264	IRF2BP2	0.0526454	ENSG00000073756	PTGS2	0.179302	ENSG00000143162	CREG1	0.105405	ENSG00000081087	OSTM1	0.398369				ENSG00000144228	SPOPL
																														ENSG00000100138	SNU13	0.0282584	ENSG00000125743	SNRPD2	0.0520506	ENSG00000168172	HOOK3	0.178936	ENSG00000070756	PABPC1	0.105292	ENSG00000163527	STT3B	0.398369				ENSG00000135837	CEP350
																														ENSG00000147526	TACC1	0.0277424	ENSG00000165168	CYBB	0.051956	ENSG00000185624	P4HB	0.177615	ENSG00000174780	SRP72	0.105083	ENSG00000138434	SSFA2	0.398369				ENSG00000142864	SERBP1
																														ENSG00000115091	ACTR3	0.0274539	ENSG00000172932	ANKRD13D	0.0512377	ENSG00000030582	GRN	0.176229	ENSG00000140678	ITGAX	0.104972	ENSG00000138433	CIR1	0.398369				ENSG00000166598	HSP90B1
																														ENSG00000152082	MZT2B	0.0273167	ENSG00000159128	IFNGR2	0.0512377	ENSG00000152601	MBNL1	0.175923	ENSG00000071082	RPL31	0.104366	ENSG00000197872	FAM49A	0.398369				ENSG00000133226	SRRM1
																														ENSG00000147684	NDUFB9	0.0271958	ENSG00000144597	EAF1	0.050802	ENSG00000139163	ETNK1	0.175752	ENSG00000103035	PSMD7	0.102825	ENSG00000123684	LPGAT1	0.398369				ENSG00000132432	SEC61G
																														ENSG00000116489	CAPZA1	0.0268323	ENSG00000144579	CTDSP1	0.050802	ENSG00000182774	RPS17	0.175311	ENSG00000105379	ETFB	0.102733	ENSG00000196419	XRCC6	0.398369				ENSG00000169976	SF3B5
																														ENSG00000172428	COPS9	0.0267986	ENSG00000138757	G3BP2	0.0504485	ENSG00000140379	BCL2A1	0.175311	ENSG00000173020	GRK2	0.102733	ENSG00000100380	ST13	0.398369				ENSG00000132334	PTPRE
																														ENSG00000183255	PTTG1IP	0.0267146	ENSG00000114942	EEF1B2	0.050345	ENSG00000119632	IFI27L2	0.175144	ENSG00000179094	PER1	0.102577	ENSG00000167522	ANKRD11	0.398369				ENSG00000124795	DEK
																														ENSG00000088930	XRN2	0.0261228	ENSG00000121281	ADCY7	0.0488889	ENSG00000136286	MYO1G	0.174774	ENSG00000137076	TLN1	0.102497	ENSG00000119707	RBM25	0.398369				ENSG00000135677	GNS
																														ENSG00000113269	RNF130	0.0255106	ENSG00000155096	AZIN1	0.0488889	ENSG00000067560	RHOA	0.174296	ENSG00000186395	KRT10	0.102053	ENSG00000089248	ERP29	0.398369				ENSG00000118503	TNFAIP3
																														ENSG00000115524	SF3B1	0.0251333	ENSG00000198242	RPL23A	0.0488285	ENSG00000243317	STMP1	0.173245	ENSG00000121281	ADCY7	0.101916	ENSG00000090376	IRAK3	0.398369				ENSG00000095015	MAP3K1
																														ENSG00000135316	SYNCRIP	0.0248607	ENSG00000147894	C9orf72	0.0485774	ENSG00000131871	SELENOS	0.173245	ENSG00000160593	JAML	0.101777	ENSG00000139112	GABARAPL1	0.398369				ENSG00000011600	TYROBP
																														ENSG00000177600	RPLP2	0.0247983	ENSG00000133961	NUMB	0.0481229	ENSG00000100836	PABPN1	0.173245	ENSG00000111669	TPI1	0.101701	ENSG00000111679	PTPN6	0.398369				ENSG00000141002	TCF25
																														ENSG00000131495	NDUFA2	0.0242901	ENSG00000178982	EIF3K	0.0481021	ENSG00000106588	PSMA2	0.173245	ENSG00000165732	DDX21	0.101195	ENSG00000135363	LMO2	0.398369				ENSG00000089248	ERP29
																														ENSG00000173141	MRPL57	0.0242901	ENSG00000263001	GTF2I	0.0470499	ENSG00000143549	TPM3	0.172916	ENSG00000119535	CSF3R	0.10081	ENSG00000186480	INSIG1	0.398369				ENSG00000136938	ANP32B
																														ENSG00000213064	SFT2D2	0.0242485	ENSG00000105701	FKBP8	0.0470499	ENSG00000197111	PCBP2	0.172104	ENSG00000115241	PPM1G	0.10073	ENSG00000005483	KMT2E	0.398369				ENSG00000166441	RPL27A
																														ENSG00000122042	UBL3	0.0239925	ENSG00000133858	ZFC3H1	0.0470499	ENSG00000099795	NDUFB7	0.17191	ENSG00000177565	TBL1XR1	0.100405	ENSG00000183696	UPP1	0.398369				ENSG00000015475	BID
																														ENSG00000148834	GSTO1	0.0236542	ENSG00000068366	ACSL4	0.0470499	ENSG00000029363	BCLAF1	0.171636	ENSG00000169564	PCBP1	0.0995896	ENSG00000106588	PSMA2	0.398369				ENSG00000104903	LYL1
																														ENSG00000145703	IQGAP2	0.0235936	ENSG00000055332	EIF2AK2	0.0470499	ENSG00000159720	ATP6V0D1	0.17092	ENSG00000127445	PIN1	0.0995361	ENSG00000114125	RNF7	0.398369				ENSG00000170348	TMED10
																														ENSG00000198053	SIRPA	0.0234437	ENSG00000089280	FUS	0.0464526	ENSG00000104964	AES	0.170515	ENSG00000204569	PPP1R10	0.0985746	ENSG00000168329	CX3CR1	0.398369				ENSG00000118058	KMT2A
																														ENSG00000177666	PNPLA2	0.0228711	ENSG00000167978	SRRM2	0.0453368	ENSG00000179144	GIMAP7	0.170515	ENSG00000102760	RGCC	0.0977839	ENSG00000144655	CSRNP1	0.398369				ENSG00000185507	IRF7
																														ENSG00000168066	SF1	0.0225637	ENSG00000173113	TRMT112	0.0452808	ENSG00000163563	MNDA	0.168343	ENSG00000103490	PYCARD	0.0974489	ENSG00000168899	VAMP5	0.398369				ENSG00000124486	USP9X
																														ENSG00000231389	HLA-DPA1	0.0224627	ENSG00000074800	ENO1	0.0451403	ENSG00000093010	COMT	0.16815	ENSG00000101608	MYL12A	0.0969249	ENSG00000173726	TOMM20	0.398369				ENSG00000112245	PTP4A1
																														ENSG00000058272	PPP1R12A	0.022421	ENSG00000178127	NDUFV2	0.0450884	ENSG00000100097	LGALS1	0.167814	ENSG00000126432	PRDX5	0.0969249	ENSG00000162772	ATF3	0.398369				ENSG00000136603	SKIL
																														ENSG00000170581	STAT2	0.0224113	ENSG00000233927	RPS28	0.0450409	ENSG00000166326	TRIM44	0.167531	ENSG00000025708	TYMP	0.0968669	ENSG00000186517	ARHGAP30	0.398369				ENSG00000077380	DYNC1I2
																														ENSG00000177410	ZFAS1	0.0223602	ENSG00000135390	ATP5MC2	0.0450255	ENSG00000157500	APPL1	0.167531	ENSG00000100911	PSME2	0.0966037	ENSG00000065135	GNAI3	0.398369				ENSG00000084090	STARD7
																														ENSG00000142657	PGD	0.0223446	ENSG00000067560	RHOA	0.0449142	ENSG00000162734	PEA15	0.167531	ENSG00000155115	GTF3C6	0.0963098	ENSG00000054118	THRAP3	0.398369				ENSG00000162368	CMPK1
																														ENSG00000079246	XRCC5	0.0222696	ENSG00000171634	BPTF	0.0441383	ENSG00000120063	GNA13	0.166258	ENSG00000095787	WAC	0.0961273	ENSG00000131051	RBM39	0.398369				ENSG00000175489	LRRC25
																														ENSG00000101972	STAG2	0.0220679	ENSG00000081237	PTPRC	0.0440042	ENSG00000085224	ATRX	0.166258	ENSG00000127022	CANX	0.096077	ENSG00000140575	IQGAP1	0.398369				ENSG00000184897	H1FX
																														ENSG00000137210	TMEM14B	0.0220341	ENSG00000143119	CD53	0.043826	ENSG00000107372	ZFAND5	0.166029	ENSG00000183255	PTTG1IP	0.0957908	ENSG00000157514	TSC22D3	0.398369				ENSG00000115935	WIPF1
																														ENSG00000179010	MRFAP1	0.0220341	ENSG00000100129	EIF3L	0.0436857	ENSG00000198899	MT-ATP6	0.165421	ENSG00000104904	OAZ1	0.0954196	ENSG00000198938	MT-CO3	0.385072				ENSG00000116209	TMEM59
																														ENSG00000103490	PYCARD	0.0219384	ENSG00000138814	PPP3CA	0.0435777	ENSG00000078369	GNB1	0.164256	ENSG00000198833	UBE2J1	0.0949633	ENSG00000092841	MYL6	0.383262				ENSG00000206503	HLA-A
																														ENSG00000100201	DDX17	0.0218794	ENSG00000013441	CLK1	0.0429917	ENSG00000184752	NDUFA12	0.164256	ENSG00000138385	SSB	0.0944136	ENSG00000131236	CAP1	0.376343				ENSG00000087086	FTL
																														ENSG00000168899	VAMP5	0.021719	ENSG00000104325	DECR1	0.0427498	ENSG00000180530	NRIP1	0.164256	ENSG00000124831	LRRFIP1	0.0943891	ENSG00000204397	CARD16	0.370355				ENSG00000139278	GLIPR1
																														ENSG00000162772	ATF3	0.0214739	ENSG00000136810	TXN	0.0420318	ENSG00000082397	EPB41L3	0.164256	ENSG00000189159	JPT1	0.0940709	ENSG00000109861	CTSC	0.36666				ENSG00000092820	EZR
																														ENSG00000143669	LYST	0.0206232	ENSG00000136560	TANK	0.041937	ENSG00000161921	CXCL16	0.164256	ENSG00000120265	PCMT1	0.0940709	ENSG00000176340	COX8A	0.363604				ENSG00000189403	HMGB1
																														ENSG00000129292	PHF20L1	0.0206095	ENSG00000099795	NDUFB7	0.0414033	ENSG00000173141	MRPL57	0.164256	ENSG00000104205	SGK3	0.0938367	ENSG00000074800	ENO1	0.363604				ENSG00000126934	MAP2K2
																														ENSG00000087302	RTRAF	0.0205622	ENSG00000092531	SNAP23	0.0414033	ENSG00000185728	YTHDF3	0.164256	ENSG00000163191	S100A11	0.0936665	ENSG00000099622	CIRBP	0.361843				ENSG00000187735	TCEA1
																														ENSG00000105993	DNAJB6	0.0204433	ENSG00000167615	LENG8	0.0407453	ENSG00000113719	ERGIC1	0.164256	ENSG00000146457	WTAP	0.0931054	ENSG00000197471	SPN	0.3553				ENSG00000153147	SMARCA5
																														ENSG00000068305	MEF2A	0.0202032	ENSG00000008083	JARID2	0.0407453	ENSG00000155506	LARP1	0.164256	ENSG00000146247	PHIP	0.0925924	ENSG00000026025	VIM	0.352565				ENSG00000168028	RPSA
																														ENSG00000082153	BZW1	0.0199758	ENSG00000096384	HSP90AB1	0.0406302	ENSG00000197223	C1D	0.164256	ENSG00000204370	SDHD	0.0920576	ENSG00000160213	CSTB	0.351063				ENSG00000116171	SCP2
																														ENSG00000112695	COX7A2	0.0199033	ENSG00000100028	SNRPD3	0.0395162	ENSG00000109332	UBE2D3	0.162496	ENSG00000131508	UBE2D2	0.0918574	ENSG00000153310	FAM49B	0.349459				ENSG00000096384	HSP90AB1
																														ENSG00000122218	COPA	0.0199033	ENSG00000167283	ATP5MG	0.0392598	ENSG00000132334	PTPRE	0.161396	ENSG00000108953	YWHAE	0.0916882	ENSG00000167863	ATP5PD	0.345902				ENSG00000120690	ELF1
																														ENSG00000122566	HNRNPA2B1	0.0190699	ENSG00000135940	COX5B	0.0381918	ENSG00000069956	MAPK6	0.160645	ENSG00000100300	TSPO	0.0916882	ENSG00000165168	CYBB	0.345902				ENSG00000141552	ANAPC11
																														ENSG00000167522	ANKRD11	0.0182983	ENSG00000115524	SF3B1	0.037863	ENSG00000186480	INSIG1	0.160645	ENSG00000153823	PID1	0.0909165	ENSG00000104904	OAZ1	0.344149				ENSG00000149269	PAK1
																														ENSG00000143612	C1orf43	0.0180716	ENSG00000106153	CHCHD2	0.0374255	ENSG00000168003	SLC3A2	0.158697	ENSG00000167522	ANKRD11	0.089669	ENSG00000067900	ROCK1	0.341785				ENSG00000156587	UBE2L6
																														ENSG00000179218	CALR	0.0175327	ENSG00000100612	DHRS7	0.0369962	ENSG00000153310	FAM49B	0.156219	ENSG00000198899	MT-ATP6	0.0896462	ENSG00000101558	VAPA	0.341785				ENSG00000112799	LY86
																														ENSG00000072110	ACTN1	0.017024	ENSG00000212907	MT-ND4L	0.036902	ENSG00000186635	ARAP1	0.155574	ENSG00000198712	MT-CO2	0.0891632	ENSG00000214253	FIS1	0.341785				ENSG00000213585	VDAC1
																														ENSG00000129559	NEDD8	0.016952	ENSG00000081189	MEF2C	0.036109	ENSG00000135930	EIF4E2	0.155574	ENSG00000170043	TRAPPC1	0.0891577	ENSG00000095015	MAP3K1	0.341785				ENSG00000173915	ATP5MD
																														ENSG00000101439	CST3	0.0168642	ENSG00000117616	RSRP1	0.0360416	ENSG00000115760	BIRC6	0.155574	ENSG00000124126	PREX1	0.0887043	ENSG00000229833	PET100	0.336968				ENSG00000198961	PJA2
																														ENSG00000197746	PSAP	0.0157778	ENSG00000104870	FCGRT	0.0346284	ENSG00000185651	UBE2L3	0.154918	ENSG00000100387	RBX1	0.0883891	ENSG00000163660	CCNL1	0.336968				ENSG00000069275	NUCKS1
																														ENSG00000143226	FCGR2A	0.0157493	ENSG00000158195	WASF2	0.0343139	ENSG00000253729	PRKDC	0.154918	ENSG00000163513	TGFBR2	0.0882996	ENSG00000119801	YPEL5	0.336968				ENSG00000185862	EVI2B
																														ENSG00000132341	RAN	0.0151963	ENSG00000234545	FAM133B	0.0343139	ENSG00000143420	ENSA	0.152183	ENSG00000089327	FXYD5	0.0880234	ENSG00000117450	PRDX1	0.336968				ENSG00000161547	SRSF2
																														ENSG00000077147	TM9SF3	0.0145336	ENSG00000132510	KDM6B	0.0341109	ENSG00000078304	PPP2R5C	0.152183	ENSG00000112739	PRPF4B	0.0879361	ENSG00000198502	HLA-DRB5	0.334239				ENSG00000062716	VMP1
																														ENSG00000000938	FGR	0.0139996	ENSG00000117335	CD46	0.0336677	ENSG00000165732	DDX21	0.152183	ENSG00000057608	GDI2	0.0878558	ENSG00000164924	YWHAZ	0.333274				ENSG00000101182	PSMA7
																														ENSG00000101336	HCK	0.0138921	ENSG00000255823	MTRNR2L8	0.033375	ENSG00000163131	CTSS	0.151317	ENSG00000167996	FTH1	0.0876936	ENSG00000104894	CD37	0.331255				ENSG00000172809	RPL38
																														ENSG00000221983	UBA52	0.0138516	ENSG00000102317	RBM3	0.0332983	ENSG00000137876	RSL24D1	0.148916	ENSG00000108639	SYNGR2	0.0875634	ENSG00000135604	STX11	0.331255				ENSG00000005020	SKAP2
																														ENSG00000109320	NFKB1	0.0138321	ENSG00000172590	MRPL52	0.0332294	ENSG00000174231	PRPF8	0.148489	ENSG00000117592	PRDX6	0.0873098	ENSG00000029363	BCLAF1	0.331255				ENSG00000101596	SMCHD1
																														ENSG00000135677	GNS	0.0136891	ENSG00000157514	TSC22D3	0.0327959	ENSG00000100823	APEX1	0.148489	ENSG00000127540	UQCR11	0.0871438	ENSG00000113811	SELENOK	0.331255				ENSG00000029363	BCLAF1
																														ENSG00000125772	GPCPD1	0.0135539	ENSG00000128016	ZFP36	0.0324146	ENSG00000012660	ELOVL5	0.148489	ENSG00000104979	C19orf53	0.0869111	ENSG00000077549	CAPZB	0.324368				ENSG00000136167	LCP1
																														ENSG00000110852	CLEC2B	0.01339	ENSG00000112081	SRSF3	0.032317	ENSG00000134996	OSTF1	0.147934	ENSG00000110011	DNAJC4	0.0867894	ENSG00000186010	NDUFA13	0.324368				ENSG00000100129	EIF3L
																														ENSG00000233927	RPS28	0.0131875	ENSG00000120616	EPC1	0.031943	ENSG00000170248	PDCD6IP	0.147183	ENSG00000110422	HIPK3	0.0867894	ENSG00000174917	C19orf70	0.324368				ENSG00000048740	CELF2
																														ENSG00000009307	CSDE1	0.0126988	ENSG00000154582	ELOC	0.031943	ENSG00000140990	NDUFB10	0.146515	ENSG00000136536	2021-03-07	0.0867894	ENSG00000178996	SNX18	0.324368				ENSG00000204472	AIF1
																														ENSG00000130255	RPL36	0.0125284	ENSG00000028277	POU2F2	0.0313154	ENSG00000150316	CWC15	0.146109	ENSG00000163399	ATP1A1	0.0867894	ENSG00000072062	PRKACA	0.315907				ENSG00000121966	CXCR4
																														ENSG00000072364	AFF4	0.0123327	ENSG00000196954	CASP4	0.0311084	ENSG00000127951	FGL2	0.146052	ENSG00000141552	ANAPC11	0.0867894	ENSG00000140350	ANP32A	0.315907				ENSG00000169554	ZEB2
																														ENSG00000214212	C19orf38	0.0120603	ENSG00000147813	NAPRT	0.0305618	ENSG00000116288	PARK7	0.145094	ENSG00000106682	EIF4H	0.0865609	ENSG00000053254	FOXN3	0.315907				ENSG00000170043	TRAPPC1
																														ENSG00000182899	RPL35A	0.01196	ENSG00000196562	SULF2	0.0303926	ENSG00000109390	NDUFC1	0.144448	ENSG00000124575	HIST1H1D	0.0859746	ENSG00000171159	C9orf16	0.315907				ENSG00000104765	BNIP3L
																														ENSG00000130724	CHMP2A	0.011869	ENSG00000177105	RHOG	0.0294915	ENSG00000125611	CHCHD5	0.144448	ENSG00000106400	ZNHIT1	0.085503	ENSG00000147894	C9orf72	0.315907				ENSG00000168214	RBPJ
																														ENSG00000204628	RACK1	0.0117406	ENSG00000159840	ZYX	0.0294915	ENSG00000204397	CARD16	0.144	ENSG00000067560	RHOA	0.0852058	ENSG00000188921	HACD4	0.315907				ENSG00000178982	EIF3K
																														ENSG00000170144	HNRNPA3	0.0116194	ENSG00000100650	SRSF5	0.029402	ENSG00000101182	PSMA7	0.143672	ENSG00000168913	ENHO	0.0849792	ENSG00000170873	MTSS1	0.315907				ENSG00000173821	RNF213
																														ENSG00000129625	REEP5	0.0111234	ENSG00000144713	RPL32	0.0293749	ENSG00000130402	ACTN4	0.142723	ENSG00000136938	ANP32B	0.0846684	ENSG00000124795	DEK	0.310906				ENSG00000139112	GABARAPL1
																														ENSG00000136758	YME1L1	0.010877	ENSG00000140612	SEC11A	0.0292856	ENSG00000106003	LFNG	0.142723	ENSG00000183648	NDUFB1	0.0846334	ENSG00000110321	EIF4G2	0.309102				ENSG00000107262	BAG1
																														ENSG00000117614	SYF2	0.0107736	ENSG00000116350	SRSF4	0.0289026	ENSG00000077380	DYNC1I2	0.142723	ENSG00000142541	RPL13A	0.083806	ENSG00000167461	RAB8A	0.30526				ENSG00000240230	COX19
																														ENSG00000161960	EIF4A1	0.0107543	ENSG00000180353	HCLS1	0.0286379	ENSG00000177105	RHOG	0.142723	ENSG00000220205	VAMP2	0.0837361	ENSG00000232388	SMIM26	0.30526				ENSG00000112081	SRSF3
																														ENSG00000184076	UQCR10	0.0107326	ENSG00000130313	PGLS	0.0281414	ENSG00000197956	S100A6	0.141682	ENSG00000100028	SNRPD3	0.0835507	ENSG00000131759	RARA	0.30526				ENSG00000114416	FXR1
																														ENSG00000165732	DDX21	0.010718	ENSG00000124172	ATP5F1E	0.0280907	ENSG00000140836	ZFHX3	0.141536	ENSG00000142227	EMP3	0.0833534	ENSG00000169896	ITGAM	0.30526				ENSG00000186432	KPNA4
																														ENSG00000148672	GLUD1	0.0103875	ENSG00000060138	YBX3	0.0279411	ENSG00000135506	OS9	0.141536	ENSG00000173915	ATP5MD	0.0833319	ENSG00000005075	POLR2J	0.30526				ENSG00000241553	ARPC4
																														ENSG00000197958	RPL12	0.0102781	ENSG00000146731	CCT6A	0.0279411	ENSG00000067829	IDH3G	0.141536	ENSG00000182944	EWSR1	0.082918	ENSG00000067560	RHOA	0.30526				ENSG00000115165	CYTIP
																														ENSG00000112149	CD83	0.0102297	ENSG00000196924	FLNA	0.0279411	ENSG00000144224	UBXN4	0.141536	ENSG00000167615	LENG8	0.082918	ENSG00000107738	VSIR	0.301072				ENSG00000020633	RUNX3
																														ENSG00000130811	EIF3G	0.0102271	ENSG00000213654	GPSM3	0.0279411	ENSG00000111596	CNOT2	0.140009	ENSG00000120727	PAIP2	0.082494	ENSG00000111229	ARPC3	0.298833				ENSG00000160075	SSU72
																														ENSG00000101182	PSMA7	0.010163	ENSG00000153187	HNRNPU	0.0278328	ENSG00000185201	IFITM2	0.139298	ENSG00000134825	TMEM258	0.0820243	ENSG00000166501	PRKCB	0.298833				ENSG00000175756	AURKAIP1
																														ENSG00000138495	COX17	0.0100232	ENSG00000168172	HOOK3	0.0275975	ENSG00000155115	GTF3C6	0.139068	ENSG00000101109	STK4	0.0811575	ENSG00000136286	MYO1G	0.298833				ENSG00000139644	TMBIM6
																														ENSG00000153147	SMARCA5	0.0099713	ENSG00000068305	MEF2A	0.0274695	ENSG00000131507	NDFIP1	0.13843	ENSG00000180370	PAK2	0.0811575	ENSG00000132205	EMILIN2	0.291454				ENSG00000116560	SFPQ
																														ENSG00000156273	BACH1	0.00935933	ENSG00000026025	VIM	0.0274583	ENSG00000206503	HLA-A	0.138091	ENSG00000120616	EPC1	0.0811575	ENSG00000103266	STUB1	0.291454				ENSG00000130255	RPL36
																														ENSG00000060237	WNK1	0.00934884	ENSG00000103363	ELOB	0.0273616	ENSG00000103187	COTL1	0.137404	ENSG00000104852	SNRNP70	0.0811575	ENSG00000129562	DAD1	0.291454				ENSG00000137752	CASP1
																														ENSG00000159210	SNF8	0.00905976	ENSG00000130255	RPL36	0.0271466	ENSG00000170906	NDUFA3	0.137348	ENSG00000182578	CSF1R	0.0811575	ENSG00000196199	MPHOSPH8	0.291454				ENSG00000119335	SET
																														ENSG00000110321	EIF4G2	0.00891789	ENSG00000122257	RBBP6	0.0266968	ENSG00000122545	2021-09-07	0.137129	ENSG00000198492	YTHDF2	0.0811575	ENSG00000107745	MICU1	0.291454				ENSG00000113269	RNF130
																														ENSG00000008988	RPS20	0.00867275	ENSG00000079246	XRCC5	0.0257312	ENSG00000138029	HADHB	0.13511	ENSG00000144635	DYNC1LI1	0.080013	ENSG00000012779	ALOX5	0.291454				ENSG00000141480	ARRB2
																														ENSG00000101608	MYL12A	0.00808651	ENSG00000063177	RPL18	0.0250236	ENSG00000100028	SNRPD3	0.13511	ENSG00000112576	CCND3	0.0798814	ENSG00000067829	IDH3G	0.291454				ENSG00000174444	RPL4
																														ENSG00000125971	DYNLRB1	0.00796634	ENSG00000058272	PPP1R12A	0.0247618	ENSG00000130303	BST2	0.13511	ENSG00000010810	FYN	0.0797156	ENSG00000169223	LMAN2	0.291454				ENSG00000147604	RPL7
																														ENSG00000089280	FUS	0.0079218	ENSG00000136436	CALCOCO2	0.0243298	ENSG00000151366	NDUFC2	0.13511	ENSG00000082996	RNF13	0.0797156	ENSG00000186432	KPNA4	0.291454				ENSG00000100353	EIF3D
																														ENSG00000157106	SMG1	0.00744774	ENSG00000159140	SON	0.0240937	ENSG00000164754	RAD21	0.13511	ENSG00000156675	RAB11FIP1	0.0792093	ENSG00000134308	YWHAQ	0.291454				ENSG00000198712	MT-CO2
																														ENSG00000111832	RWDD1	0.00723778	ENSG00000147010	SH3KBP1	0.0237108	ENSG00000254087	LYN	0.131023	ENSG00000263001	GTF2I	0.0787944	ENSG00000119535	CSF3R	0.291454				ENSG00000129757	CDKN1C
																														ENSG00000185215	TNFAIP2	0.00653157	ENSG00000170144	HNRNPA3	0.0235747	ENSG00000162434	JAK1	0.13081	ENSG00000112514	CUTA	0.0787944	ENSG00000167658	EEF2	0.291454				ENSG00000093010	COMT
																														ENSG00000204287	HLA-DRA	0.00644321	ENSG00000135404	CD63	0.023381	ENSG00000138668	HNRNPD	0.130115	ENSG00000123146	ADGRE5	0.0784034	ENSG00000085265	FCN1	0.289845				ENSG00000257923	CUX1
																														ENSG00000171634	BPTF	0.00637446	ENSG00000143947	RPS27A	0.0228502	ENSG00000142347	MYO1F	0.128851	ENSG00000120868	APAF1	0.0776853	ENSG00000155368	DBI	0.285894				ENSG00000162244	RPL29
																														ENSG00000197956	S100A6	0.00584408	ENSG00000116741	RGS2	0.0228024	ENSG00000148700	ADD3	0.128851	ENSG00000104660	LEPROTL1	0.0776853	ENSG00000197956	S100A6	0.284501				ENSG00000172428	COPS9
																														ENSG00000118181	RPS25	0.00557828	ENSG00000168894	RNF181	0.0224202	ENSG00000176853	FAM91A1	0.128851	ENSG00000136942	RPL35	0.077414	ENSG00000110719	TCIRG1	0.282892				ENSG00000128016	ZFP36
																														ENSG00000038219	BOD1L1	0.00557635	ENSG00000187446	CHP1	0.0222465	ENSG00000152234	ATP5F1A	0.128337	ENSG00000112308	C6orf62	0.0773907	ENSG00000162191	UBXN1	0.279724				ENSG00000205581	HMGN1
																														ENSG00000173436	MINOS1	0.00546084	ENSG00000132424	PNISR	0.0210547	ENSG00000176101	SSNA1	0.12773	ENSG00000183726	TMEM50A	0.0773907	ENSG00000100650	SRSF5	0.279724				ENSG00000172081	MOB3A
																														ENSG00000134186	PRPF38B	0.00499002	ENSG00000177954	RPS27	0.0204251	ENSG00000100242	SUN2	0.126121	ENSG00000128272	ATF4	0.0770414	ENSG00000092010	PSME1	0.277063				ENSG00000012779	ALOX5
																														ENSG00000120063	GNA13	0.004828	ENSG00000186517	ARHGAP30	0.019232	ENSG00000204569	PPP1R10	0.126121	ENSG00000132205	EMILIN2	0.0770414	ENSG00000111640	GAPDH	0.277063				ENSG00000174903	RAB1B
																														ENSG00000125995	ROMO1	0.00449873	ENSG00000147123	NDUFB11	0.0182909	ENSG00000179833	SERTAD2	0.126121	ENSG00000163634	THOC7	0.0761043	ENSG00000124831	LRRFIP1	0.277063				ENSG00000149177	PTPRJ
																														ENSG00000119655	NPC2	0.00448015	ENSG00000115232	ITGA4	0.0180708	ENSG00000196504	PRPF40A	0.126121	ENSG00000132475	H3F3B	0.0760901	ENSG00000204525	HLA-C	0.276197				ENSG00000204435	CSNK2B
																														ENSG00000213654	GPSM3	0.00436373	ENSG00000143384	MCL1	0.0176352	ENSG00000165119	HNRNPK	0.125782	ENSG00000168028	RPSA	0.0759248	ENSG00000100292	HMOX1	0.272838				ENSG00000135390	ATP5MC2
																														ENSG00000136930	PSMB7	0.00415284	ENSG00000188186	LAMTOR4	0.0173899	ENSG00000171858	RPS21	0.125498	ENSG00000229833	PET100	0.0756893	ENSG00000130844	ZNF331	0.272838				ENSG00000121858	TNFSF10
																														ENSG00000104972	LILRB1	0.0041122	ENSG00000204103	MAFB	0.0173829	ENSG00000146247	PHIP	0.125416	ENSG00000139644	TMBIM6	0.0756326	ENSG00000064601	CTSA	0.272838				ENSG00000234745	HLA-B
																														ENSG00000185088	RPS27L	0.00362223	ENSG00000135363	LMO2	0.0166763	ENSG00000197747	S100A10	0.124363	ENSG00000170759	KIF5B	0.0755579	ENSG00000125826	RBCK1	0.272838				ENSG00000221963	APOL6
																														ENSG00000107551	RASSF4	0.00359087	ENSG00000172243	CLEC7A	0.0163274	ENSG00000197471	SPN	0.123614	ENSG00000115310	RTN4	0.0754552	ENSG00000109083	IFT20	0.272838				ENSG00000108774	RAB5C
																														ENSG00000146457	WTAP	0.00334907	ENSG00000174444	RPL4	0.0161526	ENSG00000126524	SBDS	0.123614	ENSG00000114125	RNF7	0.0746147	ENSG00000141027	NCOR1	0.272838				ENSG00000177733	HNRNPA0
																														ENSG00000116701	NCF2	0.00303627	ENSG00000196230	TUBB	0.016097	ENSG00000164405	UQCRQ	0.123614	ENSG00000143933	CALM2	0.0743796	ENSG00000184207	PGP	0.272838				ENSG00000213654	GPSM3
																														ENSG00000174444	RPL4	0.00249307	ENSG00000138670	RASGEF1B	0.0155283	ENSG00000184260	HIST2H2AC	0.121751	ENSG00000196628	TCF4	0.0738291	ENSG00000104164	BLOC1S6	0.272838				ENSG00000167526	RPL13
																														ENSG00000108654	DDX5	0.00211103	ENSG00000100077	GRK3	0.0153411	ENSG00000140455	USP3	0.120989	ENSG00000154589	LY96	0.0737401	ENSG00000100485	SOS2	0.272838				ENSG00000197958	RPL12
																														ENSG00000173726	TOMM20	0.00173142	ENSG00000108561	C1QBP	0.0153411	ENSG00000100911	PSME2	0.120989	ENSG00000014641	MDH1	0.0725955	ENSG00000100836	PABPN1	0.272838				ENSG00000134516	DOCK2
																														ENSG00000196502	SULT1A1	0.00170821	ENSG00000101182	PSMA7	0.0153411	ENSG00000135049	AGTPBP1	0.120989	ENSG00000173230	GOLGB1	0.0718797	ENSG00000092201	SUPT16H	0.272838				ENSG00000116489	CAPZA1
																														ENSG00000132334	PTPRE	0.0014809	ENSG00000136286	MYO1G	0.0150808	ENSG00000082153	BZW1	0.120989	ENSG00000136754	ABI1	0.0712905	ENSG00000148672	GLUD1	0.272838				ENSG00000101654	RNMT
																														ENSG00000143549	TPM3	0.00138891	ENSG00000250479	CHCHD10	0.0148695	ENSG00000084234	APLP2	0.120641	ENSG00000153310	FAM49B	0.071185	ENSG00000185627	PSMD13	0.272838				ENSG00000176731	C8orf59
																														ENSG00000171530	TBCA	0.00106132	ENSG00000153234	NR4A2	0.0143131	ENSG00000142507	PSMB6	0.120313	ENSG00000116209	TMEM59	0.0703777	ENSG00000164754	RAD21	0.272838				ENSG00000145592	RPL37
																														ENSG00000147140	NONO	0.000924461	ENSG00000182899	RPL35A	0.013962	ENSG00000165637	VDAC2	0.120313	ENSG00000004700	RECQL	0.0703777	ENSG00000137207	YIPF3	0.272838				ENSG00000110934	BIN2
																														ENSG00000184007	PTP4A2	0.000407652	ENSG00000166794	PPIB	0.0137499	ENSG00000125944	HNRNPR	0.119168	ENSG00000160714	UBE2Q1	0.0703777	ENSG00000163807	KIAA1143	0.272838				ENSG00000102317	RBM3
																														ENSG00000104763	ASAH1	0.000213038	ENSG00000174748	RPL15	0.0136665	ENSG00000160710	ADAR	0.116809	ENSG00000138029	HADHB	0.0690735	ENSG00000144635	DYNC1LI1	0.272838				ENSG00000106153	CHCHD2
																														ENSG00000104765	BNIP3L	4.55777e-05	ENSG00000198771	RCSD1	0.0136468	ENSG00000154518	ATP5MC3	0.116809	ENSG00000115286	NDUFS7	0.0689681	ENSG00000225733	FGD5-AS1	0.272838				ENSG00000140678	ITGAX
																																	ENSG00000071054	MAP4K4	0.0128342	ENSG00000162924	REL	0.115347	ENSG00000142507	PSMB6	0.0689681	ENSG00000162654	GBP4	0.272838				ENSG00000134480	CCNH
																																	ENSG00000215021	PHB2	0.0128342	ENSG00000109381	ELF2	0.115347	ENSG00000141504	SAT2	0.0687738	ENSG00000008130	NADK	0.272838				ENSG00000077549	CAPZB
																																	ENSG00000232112	TMA7	0.0128342	ENSG00000084093	REST	0.115347	ENSG00000111640	GAPDH	0.0682305	ENSG00000148908	RGS10	0.272838				ENSG00000125356	NDUFA1
																																	ENSG00000147604	RPL7	0.0120923	ENSG00000213719	CLIC1	0.115182	ENSG00000134884	ARGLU1	0.0679304	ENSG00000136819	C9orf78	0.272838				ENSG00000177200	CHD9
																																	ENSG00000153922	CHD1	0.0115512	ENSG00000185862	EVI2B	0.114646	ENSG00000087470	DNM1L	0.0679304	ENSG00000156976	EIF4A2	0.272838				ENSG00000121281	ADCY7
																																	ENSG00000127922	SEM1	0.011426	ENSG00000230989	HSBP1	0.114351	ENSG00000114850	SSR3	0.0673099	ENSG00000170776	AKAP13	0.265102				ENSG00000005844	ITGAL
																																	ENSG00000116171	SCP2	0.0112737	ENSG00000150991	UBC	0.112733	ENSG00000115541	HSPE1	0.0673099	ENSG00000176845	METRNL	0.260865				ENSG00000136156	ITM2B
																																	ENSG00000101294	HM13	0.0110844	ENSG00000091527	CDV3	0.112026	ENSG00000182117	NOP10	0.0662843	ENSG00000115091	ACTR3	0.260865				ENSG00000197451	HNRNPAB
																																	ENSG00000131174	COX7B	0.0109952	ENSG00000137801	THBS1	0.111587	ENSG00000168214	RBPJ	0.0662366	ENSG00000126267	COX6B1	0.255005				ENSG00000163931	TKT
																																	ENSG00000091527	CDV3	0.010524	ENSG00000170144	HNRNPA3	0.111414	ENSG00000060138	YBX3	0.0659444	ENSG00000130522	JUND	0.252518				ENSG00000117713	ARID1A
																																	ENSG00000128534	LSM8	0.010524	ENSG00000196924	FLNA	0.111131	ENSG00000126267	COX6B1	0.065933	ENSG00000005022	SLC25A5	0.252518				ENSG00000140612	SEC11A
																																	ENSG00000185043	CIB1	0.00943562	ENSG00000140299	BNIP2	0.109115	ENSG00000255302	EID1	0.065216	ENSG00000113648	H2AFY	0.252518				ENSG00000166710	B2M
																																	ENSG00000126934	MAP2K2	0.00838829	ENSG00000197971	MBP	0.109115	ENSG00000160014	CALM3	0.065216	ENSG00000156467	UQCRB	0.251528				ENSG00000148908	RGS10
																																	ENSG00000087460	GNAS	0.00838829	ENSG00000155090	KLF10	0.109115	ENSG00000086300	SNX10	0.065216	ENSG00000105887	MTPN	0.246366				ENSG00000122644	ARL4A
																																	ENSG00000141480	ARRB2	0.00826015	ENSG00000116171	SCP2	0.109115	ENSG00000166326	TRIM44	0.065216	ENSG00000133226	SRRM1	0.246366				ENSG00000136942	RPL35
																																	ENSG00000159388	BTG2	0.00748416	ENSG00000125991	ERGIC3	0.109115	ENSG00000109390	NDUFC1	0.065216	ENSG00000165312	OTUD1	0.246366				ENSG00000105669	COPE
																																	ENSG00000042753	AP2S1	0.00718253	ENSG00000158864	NDUFS2	0.109115	ENSG00000174021	GNG5	0.0647803	ENSG00000196230	TUBB	0.246366				ENSG00000010610	CD4
																																	ENSG00000265681	RPL17	0.00676819	ENSG00000179051	RCC2	0.109115	ENSG00000182196	ARL6IP4	0.0645534	ENSG00000114861	FOXP1	0.246366				ENSG00000131051	RBM39
																																	ENSG00000121552	CSTA	0.00659946	ENSG00000240230	COX19	0.109115	ENSG00000096384	HSP90AB1	0.0645437	ENSG00000170144	HNRNPA3	0.246366				ENSG00000197956	S100A6
																																	ENSG00000140990	NDUFB10	0.00640793	ENSG00000135077	HAVCR2	0.109115	ENSG00000065518	NDUFB4	0.0644414	ENSG00000152795	HNRNPDL	0.239671				ENSG00000183011	NAA38
																																	ENSG00000108298	RPL19	0.00631107	ENSG00000089820	ARHGAP4	0.109115	ENSG00000084070	SMAP2	0.0644143	ENSG00000125356	NDUFA1	0.237904				ENSG00000107968	MAP3K8
																																	ENSG00000023902	PLEKHO1	0.00597121	ENSG00000111640	GAPDH	0.108708	ENSG00000145287	PLAC8	0.0643202	ENSG00000125995	ROMO1	0.228444				ENSG00000241468	ATP5MF
																																	ENSG00000100697	DICER1	0.00560263	ENSG00000081237	PTPRC	0.108071	ENSG00000167085	PHB	0.0635276	ENSG00000186074	CD300LF	0.228444				ENSG00000140749	IGSF6
																																	ENSG00000166888	STAT6	0.00547081	ENSG00000108953	YWHAE	0.106728	ENSG00000167642	SPINT2	0.0633933	ENSG00000171490	RSL1D1	0.228444				ENSG00000092199	HNRNPC
																																	ENSG00000189067	LITAF	0.00421371	ENSG00000165629	ATP5F1C	0.106321	ENSG00000179271	GADD45GIP1	0.0633933	ENSG00000139687	RB1	0.228444				ENSG00000174748	RPL15
																																	ENSG00000120742	SERP1	0.00415195	ENSG00000170043	TRAPPC1	0.106061	ENSG00000110442	COMMD9	0.0625419	ENSG00000173334	TRIB1	0.228444				ENSG00000105640	RPL18A
																																	ENSG00000114861	FOXP1	0.00369354	ENSG00000198900	TOP1	0.105362	ENSG00000153317	ASAP1	0.0625419	ENSG00000185825	BCAP31	0.228444				ENSG00000105329	TGFB1
																																	ENSG00000156482	RPL30	0.00344961	ENSG00000116489	CAPZA1	0.105362	ENSG00000118640	VAMP8	0.0616047	ENSG00000266472	MRPS21	0.228444				ENSG00000167851	CD300A
																																	ENSG00000164308	ERAP2	0.00332853	ENSG00000086061	DNAJA1	0.105135	ENSG00000078140	UBE2K	0.0614393	ENSG00000070831	CDC42	0.226603				ENSG00000090376	IRAK3
																																	ENSG00000082996	RNF13	0.00243902	ENSG00000100077	GRK3	0.104878	ENSG00000113712	CSNK1A1	0.0606023	ENSG00000100300	TSPO	0.226188				ENSG00000162191	UBXN1
																																	ENSG00000197956	S100A6	0.00236203	ENSG00000167173	C15orf39	0.104249	ENSG00000160194	NDUFV3	0.0601979	ENSG00000129515	SNX6	0.221491				ENSG00000175130	MARCKSL1
																																	ENSG00000107372	ZFAND5	0.0021496	ENSG00000147894	C9orf72	0.104249	ENSG00000132507	EIF5A	0.0601979	ENSG00000122034	GTF3A	0.221491				ENSG00000198727	MT-CYB
																																	ENSG00000134419	RPS15A	0.00204609	ENSG00000169045	HNRNPH1	0.104249	ENSG00000170144	HNRNPA3	0.0599679	ENSG00000206503	HLA-A	0.219144				ENSG00000149806	FAU
																																	ENSG00000120992	LYPLA1	0.00203479	ENSG00000168264	IRF2BP2	0.103996	ENSG00000243147	MRPL33	0.0595805	ENSG00000169020	ATP5ME	0.215505				ENSG00000213719	CLIC1
																																	ENSG00000135837	CEP350	0.00203479	ENSG00000071082	RPL31	0.103741	ENSG00000133313	CNDP2	0.0593394	ENSG00000188612	SUMO2	0.213944				ENSG00000104870	FCGRT
																																	ENSG00000105669	COPE	0.00124622	ENSG00000185627	PSMD13	0.103401	ENSG00000101596	SMCHD1	0.0593394	ENSG00000133872	SARAF	0.213944				ENSG00000063177	RPL18
																																	ENSG00000171490	RSL1D1	0.000671557	ENSG00000225733	FGD5-AS1	0.103401	ENSG00000172936	MYD88	0.0593394	ENSG00000198830	HMGN2	0.213944				ENSG00000139318	DUSP6
																																	ENSG00000010810	FYN	0.000483092	ENSG00000231925	TAPBP	0.10265	ENSG00000105202	FBL	0.059211	ENSG00000123338	NCKAP1L	0.205724				ENSG00000120738	EGR1
																																				ENSG00000171314	PGAM1	0.102195	ENSG00000101367	MAPRE1	0.0587897	ENSG00000131171	SH3BGRL	0.205724				ENSG00000101745	ANKRD12
																																				ENSG00000103363	ELOB	0.102195	ENSG00000178127	NDUFV2	0.0587897	ENSG00000115935	WIPF1	0.205724				ENSG00000087266	SH3BP2
																																				ENSG00000110321	EIF4G2	0.101507	ENSG00000155957	TMBIM4	0.0585561	ENSG00000143977	SNRPG	0.205724				ENSG00000087088	BAX
																																				ENSG00000105887	MTPN	0.101379	ENSG00000166710	B2M	0.058511	ENSG00000168264	IRF2BP2	0.205724				ENSG00000109475	RPL34
																																				ENSG00000177600	RPLP2	0.101357	ENSG00000124570	SERPINB6	0.0570766	ENSG00000160194	NDUFV3	0.205724				ENSG00000026297	RNASET2
																																				ENSG00000141504	SAT2	0.100344	ENSG00000124795	DEK	0.0570206	ENSG00000093010	COMT	0.205724				ENSG00000111229	ARPC3
																																				ENSG00000165669	FAM204A	0.100344	ENSG00000135441	BLOC1S1	0.0568745	ENSG00000103035	PSMD7	0.205724				ENSG00000179583	CIITA
																																				ENSG00000110696	C11orf58	0.100344	ENSG00000131759	RARA	0.0562829	ENSG00000171988	JMJD1C	0.205724				ENSG00000073614	KDM5A
																																				ENSG00000108848	LUC7L3	0.0989904	ENSG00000136930	PSMB7	0.0562829	ENSG00000057608	GDI2	0.205724				ENSG00000067064	IDI1
																																				ENSG00000115053	NCL	0.098762	ENSG00000188229	TUBB4B	0.0559827	ENSG00000067064	IDI1	0.205724				ENSG00000106560	GIMAP2
																																				ENSG00000123338	NCKAP1L	0.0981435	ENSG00000186432	KPNA4	0.0553175	ENSG00000151366	NDUFC2	0.205724				ENSG00000106682	EIF4H
																																				ENSG00000082212	ME2	0.097142	ENSG00000241399	CD302	0.0552193	ENSG00000175334	BANF1	0.205724				ENSG00000242574	HLA-DMB
																																				ENSG00000110934	BIN2	0.097142	ENSG00000170348	TMED10	0.0549477	ENSG00000119314	PTBP3	0.205724				ENSG00000269893	SNHG8
																																				ENSG00000166913	YWHAB	0.0955998	ENSG00000102317	RBM3	0.0538683	ENSG00000104388	RAB2A	0.205724				ENSG00000115524	SF3B1
																																				ENSG00000101558	VAPA	0.0944678	ENSG00000196419	XRCC6	0.0538112	ENSG00000135269	TES	0.205724				ENSG00000156411	ATP5MPL
																																				ENSG00000008018	PSMB1	0.0936016	ENSG00000143158	MPC2	0.0531432	ENSG00000112308	C6orf62	0.205724				ENSG00000170906	NDUFA3
																																				ENSG00000082898	XPO1	0.0932896	ENSG00000111843	TMEM14C	0.0525884	ENSG00000131508	UBE2D2	0.205724				ENSG00000129534	MIS18BP1
																																				ENSG00000137154	RPS6	0.093228	ENSG00000139436	GIT2	0.0522304	ENSG00000164190	NIPBL	0.205724				ENSG00000120992	LYPLA1
																																				ENSG00000108107	RPL28	0.0929627	ENSG00000085491	SLC25A24	0.0522304	ENSG00000138757	G3BP2	0.205724				ENSG00000111669	TPI1
																																				ENSG00000156467	UQCRB	0.0923929	ENSG00000103187	COTL1	0.0518514	ENSG00000136521	NDUFB5	0.205724				ENSG00000133112	TPT1
																																				ENSG00000075426	FOSL2	0.0922012	ENSG00000105404	RABAC1	0.0516535	ENSG00000135899	SP110	0.205724				ENSG00000258289	CHURC1
																																				ENSG00000196154	S100A4	0.0916272	ENSG00000131981	LGALS3	0.0515759	ENSG00000132485	ZRANB2	0.205724				ENSG00000100503	NIN
																																				ENSG00000117523	PRRC2C	0.0913884	ENSG00000158195	WASF2	0.0512091	ENSG00000188243	COMMD6	0.205724				ENSG00000010404	IDS
																																				ENSG00000133226	SRRM1	0.0911927	ENSG00000090266	NDUFB2	0.0508853	ENSG00000087086	FTL	0.204587				ENSG00000106400	ZNHIT1
																																				ENSG00000102007	PLP2	0.0902556	ENSG00000196189	SEMA4A	0.0505692	ENSG00000197405	C5AR1	0.19807				ENSG00000101782	RIOK3
																																				ENSG00000147010	SH3KBP1	0.0902556	ENSG00000155090	KLF10	0.0505692	ENSG00000143933	CALM2	0.197456				ENSG00000102144	PGK1
																																				ENSG00000099817	POLR2E	0.0902556	ENSG00000158050	DUSP2	0.0502138	ENSG00000240065	PSMB9	0.196735				ENSG00000137876	RSL24D1
																																				ENSG00000170540	ARL6IP1	0.0902556	ENSG00000234745	HLA-B	0.0501998	ENSG00000198786	MT-ND5	0.196061				ENSG00000261371	PECAM1
																																				ENSG00000183172	SMDT1	0.0902556	ENSG00000070961	ATP2B1	0.0499169	ENSG00000130303	BST2	0.191918				ENSG00000099783	HNRNPM
																																				ENSG00000169230	PRELID1	0.0896971	ENSG00000119705	SLIRP	0.049665	ENSG00000168066	SF1	0.191918				ENSG00000125304	TM9SF2
																																				ENSG00000173193	PARP14	0.0885672	ENSG00000184983	NDUFA6	0.0495684	ENSG00000081189	MEF2C	0.191918				ENSG00000198918	RPL39
																																				ENSG00000122257	RBBP6	0.0878041	ENSG00000104824	HNRNPL	0.0492964	ENSG00000107372	ZFAND5	0.189782				ENSG00000142669	SH3BGRL3
																																				ENSG00000107262	BAG1	0.0878041	ENSG00000139684	ESD	0.0492964	ENSG00000131174	COX7B	0.189782				ENSG00000132963	POMP
																																				ENSG00000117151	CTBS	0.0878041	ENSG00000063046	EIF4B	0.0491697	ENSG00000101084	RAB5IF	0.186865				ENSG00000113387	SUB1
																																				ENSG00000026508	CD44	0.0877081	ENSG00000099977	DDT	0.0489239	ENSG00000181467	RAP2B	0.186865				ENSG00000129515	SNX6
																																				ENSG00000166012	TAF1D	0.0870883	ENSG00000176340	COX8A	0.0487655	ENSG00000153234	NR4A2	0.186865				ENSG00000106245	BUD31
																																				ENSG00000163412	EIF4E3	0.0870883	ENSG00000120690	ELF1	0.048033	ENSG00000116209	TMEM59	0.186865				ENSG00000118482	PHF3
																																				ENSG00000176340	COX8A	0.0868389	ENSG00000179583	CIITA	0.0468621	ENSG00000136156	ITM2B	0.186865				ENSG00000115268	RPS15
																																				ENSG00000051108	HERPUD1	0.0867468	ENSG00000128524	ATP6V1F	0.0467999	ENSG00000030582	GRN	0.18264				ENSG00000122026	RPL21
																																				ENSG00000178741	COX5A	0.0863227	ENSG00000182831	C16orf72	0.0466003	ENSG00000140749	IGSF6	0.18264				ENSG00000213145	CRIP1
																																				ENSG00000115956	PLEK	0.0857821	ENSG00000100811	YY1	0.0463446	ENSG00000130755	GMFG	0.179056				ENSG00000169429	CXCL8
																																				ENSG00000067900	ROCK1	0.0852679	ENSG00000136521	NDUFB5	0.0459477	ENSG00000177600	RPLP2	0.177527				ENSG00000198938	MT-CO3
																																				ENSG00000144381	HSPD1	0.0850691	ENSG00000165280	VCP	0.0455336	ENSG00000215301	DDX3X	0.175977				ENSG00000134333	LDHA
																																				ENSG00000123689	G0S2	0.0848539	ENSG00000198938	MT-CO3	0.0445778	ENSG00000130725	UBE2M	0.175977				ENSG00000186350	RXRA
																																				ENSG00000172590	MRPL52	0.0826424	ENSG00000132334	PTPRE	0.0445655	ENSG00000160410	SHKBP1	0.175977				ENSG00000188846	RPL14
																																				ENSG00000137076	TLN1	0.0812356	ENSG00000204256	BRD2	0.0442623	ENSG00000197006	METTL9	0.175977
																																				ENSG00000131446	MGAT1	0.0810223	ENSG00000196262	PPIA	0.0431976	ENSG00000119632	IFI27L2	0.175977
																																				ENSG00000204642	HLA-F	0.0807328	ENSG00000169230	PRELID1	0.0430092	ENSG00000138119	MYOF	0.175977
																																				ENSG00000105402	NAPA	0.0803173	ENSG00000161835	GRASP	0.042986	ENSG00000165637	VDAC2	0.175977
																																				ENSG00000174437	ATP2A2	0.0803173	ENSG00000197766	CFD	0.0428748	ENSG00000023445	BIRC3	0.175977
																																				ENSG00000124831	LRRFIP1	0.0799872	ENSG00000184990	SIVA1	0.0428748	ENSG00000133321	RARRES3	0.175977
																																				ENSG00000101439	CST3	0.0799642	ENSG00000130332	LSM7	0.0428047	ENSG00000096968	JAK2	0.175977
																																				ENSG00000114857	NKTR	0.0796708	ENSG00000197746	PSAP	0.0427708	ENSG00000176853	FAM91A1	0.175977
																																				ENSG00000125356	NDUFA1	0.0793672	ENSG00000119013	NDUFB3	0.0426205	ENSG00000104714	ERICH1	0.175977
																																				ENSG00000147065	MSN	0.079191	ENSG00000169499	PLEKHA2	0.0424959	ENSG00000071553	ATP6AP1	0.175977
																																				ENSG00000103653	CSK	0.0785263	ENSG00000143753	DEGS1	0.0424959	ENSG00000133574	GIMAP4	0.175977
																																				ENSG00000112335	SNX3	0.0777766	ENSG00000019582	CD74	0.0417605	ENSG00000106355	LSM5	0.175977
																																				ENSG00000182004	SNRPE	0.0759477	ENSG00000130811	EIF3G	0.0408146	ENSG00000072364	AFF4	0.175977
																																				ENSG00000142541	RPL13A	0.0756626	ENSG00000105939	ZC3HAV1	0.0406424	ENSG00000134056	MRPS36	0.175977
																																				ENSG00000167863	ATP5PD	0.0754469	ENSG00000092201	SUPT16H	0.0405156	ENSG00000109320	NFKB1	0.175977
																																				ENSG00000138964	PARVG	0.0749888	ENSG00000124562	SNRPC	0.0405156	ENSG00000065413	ANKRD44	0.175977
																																				ENSG00000198843	SELENOT	0.0749888	ENSG00000198961	PJA2	0.0403413	ENSG00000162511	LAPTM5	0.175977
																																				ENSG00000104763	ASAH1	0.0748923	ENSG00000149357	LAMTOR1	0.0401838	ENSG00000075624	ACTB	0.165497
																																				ENSG00000142634	EFHD2	0.0744356	ENSG00000123358	NR4A1	0.0390321	ENSG00000156261	CCT8	0.163904
																																				ENSG00000164190	NIPBL	0.0734907	ENSG00000137876	RSL24D1	0.0387879	ENSG00000100796	PPP4R3A	0.163904
																																				ENSG00000126756	UXT	0.072374	ENSG00000196504	PRPF40A	0.0384367	ENSG00000172590	MRPL52	0.163904
																																				ENSG00000136240	KDELR2	0.071916	ENSG00000135486	HNRNPA1	0.0383755	ENSG00000159840	ZYX	0.163904
																																				ENSG00000164691	TAGAP	0.071916	ENSG00000157916	RER1	0.0382489	ENSG00000204387	C6orf48	0.163904
																																				ENSG00000044574	HSPA5	0.0713842	ENSG00000143977	SNRPG	0.0380662	ENSG00000131495	NDUFA2	0.163904
																																				ENSG00000197766	CFD	0.0713232	ENSG00000113387	SUB1	0.0379728	ENSG00000003402	CFLAR	0.163904
																																				ENSG00000204256	BRD2	0.0700148	ENSG00000090013	BLVRB	0.0379324	ENSG00000182004	SNRPE	0.163904
																																				ENSG00000141367	CLTC	0.0692219	ENSG00000099622	CIRBP	0.0378301	ENSG00000149932	TMEM219	0.157361
																																				ENSG00000121552	CSTA	0.0691122	ENSG00000115935	WIPF1	0.0376302	ENSG00000067082	KLF6	0.157361
																																				ENSG00000142864	SERBP1	0.0690594	ENSG00000162585	FAAP20	0.037065	ENSG00000015285	WAS	0.157361
																																				ENSG00000142534	RPS11	0.0686909	ENSG00000213741	RPS29	0.0367676	ENSG00000112081	SRSF3	0.157361
																																				ENSG00000154723	ATP5PF	0.0678264	ENSG00000241343	RPL36A	0.0359788	ENSG00000170315	UBB	0.151729
																																				ENSG00000172809	RPL38	0.067172	ENSG00000136819	C9orf78	0.0357722	ENSG00000120533	ENY2	0.150441
																																				ENSG00000180353	HCLS1	0.0667683	ENSG00000118816	CCNI	0.0356292	ENSG00000198899	MT-ATP6	0.136964
																																				ENSG00000140264	SERF2	0.0666225	ENSG00000145675	PIK3R1	0.034722	ENSG00000105669	COPE	0.135335
																																				ENSG00000131171	SH3BGRL	0.0647205	ENSG00000108946	PRKAR1A	0.034355	ENSG00000125870	SNRPB2	0.135335
																																				ENSG00000184983	NDUFA6	0.0647205	ENSG00000189403	HMGB1	0.034355	ENSG00000128524	ATP6V1F	0.135335
																																				ENSG00000126934	MAP2K2	0.0647205	ENSG00000184924	PTRHD1	0.0332912	ENSG00000118418	HMGN3	0.135335
																																				ENSG00000125971	DYNLRB1	0.0647205	ENSG00000277443	MARCKS	0.0331871	ENSG00000198951	NAGA	0.135335
																																				ENSG00000008294	SPAG9	0.0647205	ENSG00000178982	EIF3K	0.0330081	ENSG00000105281	SLC1A5	0.135335
																																				ENSG00000119013	NDUFB3	0.0647205	ENSG00000009307	CSDE1	0.0327945	ENSG00000130312	MRPL34	0.135335
																																				ENSG00000177733	HNRNPA0	0.0647205	ENSG00000158717	RNF166	0.0327945	ENSG00000007312	CD79B	0.135335
																																				ENSG00000143337	TOR1AIP1	0.0647205	ENSG00000132485	ZRANB2	0.0327945	ENSG00000121281	ADCY7	0.135335
																																				ENSG00000140740	UQCRC2	0.0647205	ENSG00000069275	NUCKS1	0.0324361	ENSG00000138592	USP8	0.135335
																																				ENSG00000084207	GSTP1	0.0647205	ENSG00000126804	ZBTB1	0.0323514	ENSG00000166888	STAT6	0.135335
																																				ENSG00000112406	HECA	0.0647205	ENSG00000085224	ATRX	0.0319535	ENSG00000119979	FAM45A	0.135335
																																				ENSG00000100650	SRSF5	0.0638318	ENSG00000278311	GGNBP2	0.0312687	ENSG00000166275	BORCS7	0.135335
																																				ENSG00000113269	RNF130	0.0626928	ENSG00000184640	2021-09-09	0.0312687	ENSG00000168010	ATG16L2	0.135335
																																				ENSG00000111229	ARPC3	0.061145	ENSG00000101265	RASSF2	0.0309718	ENSG00000159069	FBXW5	0.135335
																																				ENSG00000186350	RXRA	0.0590739	ENSG00000173113	TRMT112	0.0307001	ENSG00000106948	AKNA	0.135335
																																				ENSG00000151702	FLI1	0.0584885	ENSG00000164032	H2AFZ	0.0304988	ENSG00000083168	KAT6A	0.135335
																																				ENSG00000105202	FBL	0.0577677	ENSG00000170776	AKAP13	0.029375	ENSG00000232119	MCTS1	0.135335
																																				ENSG00000119396	RAB14	0.0568584	ENSG00000131495	NDUFA2	0.0291467	ENSG00000085224	ATRX	0.135335
																																				ENSG00000077721	UBE2A	0.0568584	ENSG00000177600	RPLP2	0.0290917	ENSG00000102172	SMS	0.135335
																																				ENSG00000112715	VEGFA	0.0568584	ENSG00000100353	EIF3D	0.0283164	ENSG00000285437	POLR2J3	0.135335
																																				ENSG00000114125	RNF7	0.0568584	ENSG00000087365	SF3B2	0.0278867	ENSG00000241685	ARPC1A	0.135335
																																				ENSG00000155629	PIK3AP1	0.0563082	ENSG00000107290	SETX	0.0276081	ENSG00000205413	SAMD9	0.135335
																																				ENSG00000129625	REEP5	0.0563082	ENSG00000108179	PPIF	0.0267098	ENSG00000204463	BAG6	0.135335
																																				ENSG00000167552	TUBA1A	0.0561888	ENSG00000167283	ATP5MG	0.0255136	ENSG00000177565	TBL1XR1	0.135335
																																				ENSG00000137575	SDCBP	0.0559396	ENSG00000129657	SEC14L1	0.024574	ENSG00000127838	PNKD	0.135335
																																				ENSG00000118640	VAMP8	0.0553947	ENSG00000113013	HSPA9	0.024574	ENSG00000144224	UBXN4	0.135335
																																				ENSG00000162511	LAPTM5	0.0550518	ENSG00000170802	FOXN2	0.024574	ENSG00000136731	UGGT1	0.135335
																																				ENSG00000184557	SOCS3	0.0540732	ENSG00000228300	C19orf24	0.024574	ENSG00000169967	MAP3K2	0.135335
																																				ENSG00000124731	TREM1	0.0540732	ENSG00000259001	AL355075.4	0.024574	ENSG00000162976	PQLC3	0.135335
																																				ENSG00000095787	WAC	0.0534052	ENSG00000134308	YWHAQ	0.024574	ENSG00000143622	RIT1	0.135335
																																				ENSG00000124570	SERPINB6	0.0530387	ENSG00000105583	WDR83OS	0.0231086	ENSG00000160714	UBE2Q1	0.135335
																																				ENSG00000089327	FXYD5	0.0528072	ENSG00000100129	EIF3L	0.0228242	ENSG00000156171	DRAM2	0.135335
																																				ENSG00000115271	GCA	0.0517814	ENSG00000118508	RAB32	0.0226362	ENSG00000174574	AKIRIN1	0.135335
																																				ENSG00000055609	KMT2C	0.0507813	ENSG00000140307	GTF2A2	0.0225827	ENSG00000157191	NECAP2	0.135335
																																				ENSG00000099800	TIMM13	0.0502209	ENSG00000133773	CCDC59	0.0219244	ENSG00000142168	SOD1	0.135335
																																				ENSG00000147813	NAPRT	0.0502209	ENSG00000158517	NCF1	0.0219244	ENSG00000178980	SELENOW	0.135335
																																				ENSG00000118689	FOXO3	0.0502209	ENSG00000188313	PLSCR1	0.0218234	ENSG00000132510	KDM6B	0.135335
																																				ENSG00000169020	ATP5ME	0.0502209	ENSG00000176978	DPP7	0.0217144	ENSG00000100811	YY1	0.135335
																																				ENSG00000197629	MPEG1	0.0492139	ENSG00000240230	COX19	0.0217144	ENSG00000126777	KTN1	0.135335
																																				ENSG00000188612	SUMO2	0.0491796	ENSG00000125772	GPCPD1	0.0214681	ENSG00000171206	TRIM8	0.135335
																																				ENSG00000125772	GPCPD1	0.0490898	ENSG00000113282	CLINT1	0.0211754	ENSG00000089820	ARHGAP4	0.135335
																																				ENSG00000163466	ARPC2	0.0488541	ENSG00000147123	NDUFB11	0.0208858	ENSG00000127022	CANX	0.135335
																																				ENSG00000114416	FXR1	0.0482324	ENSG00000181222	POLR2A	0.0201281	ENSG00000185201	IFITM2	0.130889
																																				ENSG00000117592	PRDX6	0.0482324	ENSG00000008988	RPS20	0.0194225	ENSG00000025708	TYMP	0.126289
																																				ENSG00000118503	TNFAIP3	0.047647	ENSG00000075415	SLC25A3	0.01927	ENSG00000166710	B2M	0.123663
																																				ENSG00000132510	KDM6B	0.0474425	ENSG00000070190	DAPP1	0.0186734	ENSG00000103653	CSK	0.120835
																																				ENSG00000099331	MYO9B	0.0470185	ENSG00000119508	NR4A3	0.0185502	ENSG00000212907	MT-ND4L	0.119653
																																				ENSG00000162909	CAPN2	0.0470185	ENSG00000076662	ICAM3	0.0183331	ENSG00000164111	ANXA5	0.119653
																																				ENSG00000204525	HLA-C	0.0469444	ENSG00000157500	APPL1	0.0181477	ENSG00000180879	SSR4	0.118261
																																				ENSG00000268734	AC245128.3	0.0465731	ENSG00000087088	BAX	0.0179511	ENSG00000257764	AC020656.1	0.114576
																																				ENSG00000163479	SSR2	0.0462004	ENSG00000109083	IFT20	0.0175193	ENSG00000241343	RPL36A	0.114576
																																				ENSG00000213585	VDAC1	0.0456116	ENSG00000166927	MS4A7	0.0175193	ENSG00000101336	HCK	0.114576
																																				ENSG00000075624	ACTB	0.0455961	ENSG00000161203	AP2M1	0.0175193	ENSG00000173821	RNF213	0.114576
																																				ENSG00000129235	TXNDC17	0.0445426	ENSG00000127914	AKAP9	0.0171565	ENSG00000134294	SLC38A2	0.114576
																																				ENSG00000089248	ERP29	0.0445426	ENSG00000109536	FRG1	0.0167545	ENSG00000169564	PCBP1	0.112065
																																				ENSG00000105968	H2AFV	0.0435972	ENSG00000163466	ARPC2	0.0163677	ENSG00000130520	LSM4	0.108862
																																				ENSG00000119314	PTBP3	0.0429161	ENSG00000131051	RBM39	0.0162747	ENSG00000213246	SUPT4H1	0.108862
																																				ENSG00000159210	SNF8	0.0420004	ENSG00000101347	SAMHD1	0.0161066	ENSG00000114857	NKTR	0.108862
																																				ENSG00000138670	RASGEF1B	0.0420004	ENSG00000187735	TCEA1	0.0158038	ENSG00000166913	YWHAB	0.108862
																																				ENSG00000135837	CEP350	0.0420004	ENSG00000104823	ECH1	0.0158038	ENSG00000109971	HSPA8	0.108862
																																				ENSG00000179094	PER1	0.0420004	ENSG00000240972	MIF	0.0144141	ENSG00000120742	SERP1	0.106906
																																				ENSG00000112514	CUTA	0.0420004	ENSG00000105669	COPE	0.0141788	ENSG00000116560	SFPQ	0.104638
																																				ENSG00000234745	HLA-B	0.0413333	ENSG00000150316	CWC15	0.014107	ENSG00000163466	ARPC2	0.100288
																																				ENSG00000080824	HSP90AA1	0.0412821	ENSG00000140931	CMTM3	0.013575	ENSG00000100028	SNRPD3	0.0988087
																																				ENSG00000089280	FUS	0.0412615	ENSG00000166598	HSP90B1	0.0134003	ENSG00000214212	C19orf38	0.0988087
																																				ENSG00000021355	SERPINB1	0.0412615	ENSG00000136436	CALCOCO2	0.012986	ENSG00000025293	PHF20	0.0988087
																																				ENSG00000169554	ZEB2	0.0410044	ENSG00000204472	AIF1	0.0119524	ENSG00000017797	RALBP1	0.0988087
																																				ENSG00000241343	RPL36A	0.0407946	ENSG00000198900	TOP1	0.01175	ENSG00000104131	EIF3J	0.0988087
																																				ENSG00000120727	PAIP2	0.0407036	ENSG00000084090	STARD7	0.0113986	ENSG00000184014	DENND5A	0.0988087
																																				ENSG00000135486	HNRNPA1	0.0407036	ENSG00000105887	MTPN	0.0107682	ENSG00000130560	UBAC1	0.0988087
																																				ENSG00000171490	RSL1D1	0.0401425	ENSG00000130312	MRPL34	0.0107682	ENSG00000122694	GLIPR2	0.0988087
																																				ENSG00000180370	PAK2	0.0401425	ENSG00000103363	ELOB	0.0105898	ENSG00000146701	MDH2	0.0988087
																																				ENSG00000135269	TES	0.0396295	ENSG00000180817	PPA1	0.0105237	ENSG00000112245	PTP4A1	0.0988087
																																				ENSG00000153786	ZDHHC7	0.0387253	ENSG00000139083	ETV6	0.0102187	ENSG00000168394	TAP1	0.0988087
																																				ENSG00000118263	KLF7	0.0387253	ENSG00000074842	MYDGF	0.00930725	ENSG00000114416	FXR1	0.0988087
																																				ENSG00000119535	CSF3R	0.0387253	ENSG00000122705	CLTA	0.00912561	ENSG00000168894	RNF181	0.0988087
																																				ENSG00000198830	HMGN2	0.038503	ENSG00000185215	TNFAIP2	0.00907291	ENSG00000158825	CDA	0.0988087
																																				ENSG00000255302	EID1	0.0379536	ENSG00000204264	PSMB8	0.0085358	ENSG00000026297	RNASET2	0.0988087
																																				ENSG00000000938	FGR	0.0377534	ENSG00000005059	MCUB	0.00845434	ENSG00000152601	MBNL1	0.0988087
																																				ENSG00000133318	RTN3	0.0376086	ENSG00000005022	SLC25A5	0.00830284	ENSG00000127314	RAP1B	0.0958062
																																				ENSG00000167460	TPM4	0.0374131	ENSG00000121274	TENT4B	0.00750049	ENSG00000051523	CYBA	0.0955727
																																				ENSG00000086730	LAT2	0.0367061	ENSG00000093010	COMT	0.00697995	ENSG00000111348	ARHGDIB	0.0935144
																																				ENSG00000107290	SETX	0.0367061	ENSG00000168003	SLC3A2	0.0066521	ENSG00000102265	TIMP1	0.0902467
																																				ENSG00000138071	ACTR2	0.0367061	ENSG00000206503	HLA-A	0.00622298	ENSG00000105583	WDR83OS	0.0902467
																																				ENSG00000019582	CD74	0.0366472	ENSG00000197111	PCBP2	0.00560051	ENSG00000152234	ATP5F1A	0.0902467
																																				ENSG00000160213	CSTB	0.036264	ENSG00000140264	SERF2	0.00535363	ENSG00000184640	2021-09-09	0.0902467
																																				ENSG00000144746	ARL6IP5	0.0360998	ENSG00000170515	PA2G4	0.00520868	ENSG00000262202	AC007952.4	0.0902467
																																				ENSG00000067048	DDX3Y	0.0353367	ENSG00000131469	RPL27	0.00494896	ENSG00000058272	PPP1R12A	0.0902467
																																				ENSG00000070756	PABPC1	0.0336645	ENSG00000111716	LDHB	0.00491548	ENSG00000112335	SNX3	0.0902467
																																				ENSG00000072110	ACTN1	0.0330116	ENSG00000152082	MZT2B	0.00420116	ENSG00000163191	S100A11	0.0795468
																																				ENSG00000102572	STK24	0.0330116	ENSG00000139343	SNRPF	0.00391454	ENSG00000221983	UBA52	0.0776588
																																				ENSG00000115561	CHMP3	0.0330116	ENSG00000187514	PTMA	0.00284924	ENSG00000165732	DDX21	0.0764409
																																				ENSG00000070831	CDC42	0.0327637	ENSG00000163563	MNDA	0.00246017	ENSG00000184990	SIVA1	0.0764409
																																				ENSG00000134516	DOCK2	0.0321526	ENSG00000133226	SRRM1	0.00220619	ENSG00000140105	WARS	0.0764409
																																				ENSG00000084733	RAB10	0.0321526	ENSG00000132274	TRIM22	0.00220619	ENSG00000132963	POMP	0.0764409
																																				ENSG00000213246	SUPT4H1	0.0315536	ENSG00000088986	DYNLL1	0.00196444	ENSG00000186184	POLR1D	0.0764409
																																				ENSG00000004059	ARF5	0.0307731	ENSG00000189043	NDUFA4	0.00169954	ENSG00000084234	APLP2	0.0764409
																																				ENSG00000072062	PRKACA	0.0281946	ENSG00000188243	COMMD6	0.00159989	ENSG00000146007	ZMAT2	0.0764409
																																				ENSG00000154146	NRGN	0.0281946	ENSG00000156052	GNAQ	0.000727266	ENSG00000153187	HNRNPU	0.0764409
																																				ENSG00000131143	COX4I1	0.0257263				ENSG00000136250	AOAH	0.0764409
																																				ENSG00000137409	MTCH1	0.0247224				ENSG00000269028	MTRNR2L12	0.0743665
																																				ENSG00000133246	PRAM1	0.0240785				ENSG00000251562	MALAT1	0.0663112
																																				ENSG00000108061	SHOC2	0.0240785				ENSG00000023191	RNH1	0.0657936
																																				ENSG00000232956	SNHG15	0.0240785				ENSG00000086061	DNAJA1	0.0657936
																																				ENSG00000168036	CTNNB1	0.0240785				ENSG00000160888	IER2	0.0627659
																																				ENSG00000100034	PPM1F	0.0231414				ENSG00000108107	RPL28	0.0617886
																																				ENSG00000123200	ZC3H13	0.0231414				ENSG00000137076	TLN1	0.061334
																																				ENSG00000114978	MOB1A	0.0231414				ENSG00000108774	RAB5C	0.061334
																																				ENSG00000179820	MYADM	0.0224922				ENSG00000169813	HNRNPF	0.061334
																																				ENSG00000115165	CYTIP	0.0222371				ENSG00000122862	SRGN	0.0582935
																																				ENSG00000011600	TYROBP	0.0219682				ENSG00000205542	TMSB4X	0.0535899
																																				ENSG00000173915	ATP5MD	0.0216518				ENSG00000128340	RAC2	0.0504457
																																				ENSG00000131759	RARA	0.0216518				ENSG00000128245	YWHAH	0.0504457
																																				ENSG00000166523	CLEC4E	0.0205207				ENSG00000099795	NDUFB7	0.0504457
																																				ENSG00000113282	CLINT1	0.0205207				ENSG00000171634	BPTF	0.0504457
																																				ENSG00000123066	MED13L	0.0200514				ENSG00000149923	PPP4C	0.0504457
																																				ENSG00000140749	IGSF6	0.0199066				ENSG00000103429	BFAR	0.0504457
																																				ENSG00000100387	RBX1	0.0189168				ENSG00000086666	ZFAND6	0.0504457
																																				ENSG00000131979	GCH1	0.0189168				ENSG00000186469	GNG2	0.0504457
																																				ENSG00000168724	DNAJC21	0.0189168				ENSG00000166012	TAF1D	0.0504457
																																				ENSG00000165502	RPL36AL	0.0186085				ENSG00000166002	SMCO4	0.0504457
																																				ENSG00000100503	NIN	0.0174148				ENSG00000165264	NDUFB6	0.0504457
																																				ENSG00000163162	RNF149	0.0160052				ENSG00000128609	NDUFA5	0.0504457
																																				ENSG00000141759	TXNL4A	0.0153324				ENSG00000177556	ATOX1	0.0504457
																																				ENSG00000169499	PLEKHA2	0.0153324				ENSG00000044115	CTNNA1	0.0504457
																																				ENSG00000131981	LGALS3	0.0146798				ENSG00000120738	EGR1	0.0504457
																																				ENSG00000108774	RAB5C	0.0122531				ENSG00000145703	IQGAP2	0.0504457
																																				ENSG00000139083	ETV6	0.0122531				ENSG00000128699	ORMDL1	0.0504457
																																				ENSG00000122862	SRGN	0.0122531				ENSG00000082898	XPO1	0.0504457
																																				ENSG00000130066	SAT1	0.0116885				ENSG00000115760	BIRC6	0.0504457
																																				ENSG00000124762	CDKN1A	0.00985854				ENSG00000143549	TPM3	0.0484265
																																				ENSG00000143376	SNX27	0.00957892				ENSG00000198755	RPL10A	0.0465253
																																				ENSG00000198951	NAGA	0.00876407				ENSG00000178741	COX5A	0.0422252
																																				ENSG00000108175	ZMIZ1	0.00876407				ENSG00000119048	UBE2B	0.0422252
																																				ENSG00000135932	CAB39	0.00876407				ENSG00000116459	ATP5PB	0.0422252
																																				ENSG00000182944	EWSR1	0.00876407				ENSG00000197958	RPL12	0.0392135
																																				ENSG00000176845	METRNL	0.00876407				ENSG00000138071	ACTR2	0.0381934
																																				ENSG00000136490	LIMD2	0.00723498				ENSG00000141505	ASGR1	0.0357989
																																				ENSG00000160551	TAOK1	0.00723498				ENSG00000002586	CD99	0.0357989
																																				ENSG00000158050	DUSP2	0.00651668				ENSG00000006576	PHTF2	0.0357989
																																				ENSG00000134248	LAMTOR5	0.00637649				ENSG00000146425	DYNLT1	0.0357989
																																				ENSG00000184007	PTP4A2	0.00628365				ENSG00000113141	IK	0.0357989
																																				ENSG00000179271	GADD45GIP1	0.00582678				ENSG00000174953	DHX36	0.0357989
																																				ENSG00000096968	JAK2	0.00582678				ENSG00000158050	DUSP2	0.0357989
																																				ENSG00000188641	DPYD	0.00582678				ENSG00000143870	PDIA6	0.0357989
																																				ENSG00000118816	CCNI	0.00565855				ENSG00000135837	CEP350	0.0357989
																																				ENSG00000115875	SRSF7	0.00516363				ENSG00000160710	ADAR	0.0357989
																																				ENSG00000118515	SGK1	0.00452569				ENSG00000102144	PGK1	0.0322411
																																				ENSG00000189043	NDUFA4	0.00382569				ENSG00000163041	H3F3A	0.0322411
																																				ENSG00000118508	RAB32	0.00331993				ENSG00000175390	EIF3F	0.0306372
																																				ENSG00000135604	STX11	0.00331993				ENSG00000172354	GNB2	0.0306372
																																				ENSG00000138069	RAB1A	0.00331993				ENSG00000118640	VAMP8	0.0306372
																																				ENSG00000109180	OCIAD1	0.00331993				ENSG00000255823	MTRNR2L8	0.0264002
																																				ENSG00000113916	BCL6	0.00331993				ENSG00000140455	USP3	0.0264002
																																				ENSG00000158417	EIF5B	0.00331993				ENSG00000133961	NUMB	0.0264002
																																				ENSG00000099622	CIRBP	0.00331993				ENSG00000155629	PIK3AP1	0.0264002
																																				ENSG00000092010	PSME1	0.002862				ENSG00000095787	WAC	0.0264002
																																				ENSG00000155957	TMBIM4	0.00235459				ENSG00000131238	PPT1	0.0264002
																																										ENSG00000156482	RPL30	0.0243432
																																										ENSG00000140990	NDUFB10	0.0198573
																																										ENSG00000103811	CTSH	0.0198573
																																										ENSG00000135486	HNRNPA1	0.0198573
																																										ENSG00000184260	HIST2H2AC	0.0198573
																																										ENSG00000105372	RPS19	0.0180969
																																										ENSG00000221869	CEBPD	0.0150403
																																										ENSG00000174886	NDUFA11	0.0150403
																																										ENSG00000183011	NAA38	0.0150403
																																										ENSG00000089280	FUS	0.0150403
																																										ENSG00000116473	RAP1A	0.0150403
																																										ENSG00000142227	EMP3	0.0134515
																																										ENSG00000088832	FKBP1A	0.0113458
																																										ENSG00000180370	PAK2	0.0113458
																																										ENSG00000114353	GNAI2	0.00717821
																																										ENSG00000121552	CSTA	0.00409002
																																										ENSG00000146066	HIGD2A	0.00103347
[truncated: 4 more columns]
